# Supplementary material for: Transcriptome profiling of HepG2 cells exposed to the flame retardant 9,10-dihydro-9-oxa-10-phosphaphenanthrene 10-oxide (DOPO)
Source: Royal Society of Chemistry journal article supplement (doi:10.1039/c8tx00006a), 2018-01-01
Supplement: c8tx00006a1.zip [file Supplementary_File_2.xlsx]

## Sheet: High-dose DOPO GO terms
GOID	GOTerm	Ontology Source	Term PValue	Term PValue Corrected with Benjamini-Hochberg	GOLevels	% Associated Genes	Nr. Genes	Associated Genes Found
GO:0044281	small molecule metabolic process	GO_BiologicalProcess-GOA_09.02.2016_16h18	3.9e-21	9.6e-18	[3]	11.4517	325	[ABAT, ABCA1, ABCB1, ABCG5, ACAD9, ACADM, ACADS, ACLY, ACOT11, ACSL1, ACSL3, ACSL4, ACSS1, ADH4, ADH5, ADI1, ADNP, ADSL, AGPAT1, AK1, AKR1B10, AKR1C1, AKR1C2, AKR1D1, AKR7A2, AKT1, ALDH3B1, ALDH7A1, AOC3, APOA2, APOBEC3C, APOC1, APOC3, APOF, APOM, APP, APRT, ARF1, ARSG, ARSI, ATAT1, ATN1, ATP5G2, ATP5I, ATPIF1, AZIN1, B3GLCT, B4GALT2, BLVRA, BLVRB, BNIP2, BPGM, BPHL, BRCA1, BRIP1, BUD31, C3, CA9,…
GO:0044249	cellular biosynthetic process	GO_BiologicalProcess-GOA_09.02.2016_16h18	2e-16	1.6e-13	[3]	9.19123	583	[ABAT, ABCA1, ABCF1, ABL1, ACADM, ACLY, ACOT11, ACSL1, ACSL3, ACSL4, ACSS1, ADAMTSL4, ADGRG3, ADI1, ADNP, ADSL, AFF1, AFF4, AGPAT1, AK1, AKR1D1, AKT1, ALDH3B1, ALDH7A1, ALG11, ALPK3, ANK2, ANKRD52, ANXA4, APOA2, APOC1, APOC3, APP, APRT, ARF1, ARGLU1, ARHGAP35, ARHGEF11, ARID1B, ARNTL2, ARRB1, ASF1B, ASXL1, ASXL2, ATAD2, ATF7, ATN1, ATP1A1, ATP5G2, ATP5I, ATPIF1, AURKAIP1, AXIN1, AZIN1, B3GLCT, B4…
GO:1901576	organic substance biosynthetic process	GO_BiologicalProcess-GOA_09.02.2016_16h18	1.4e-16	1.7e-13	[3]	9.17559	591	[ABAT, ABCA1, ABCF1, ABL1, ACADM, ACLY, ACOT11, ACSL1, ACSL3, ACSL4, ACSS1, ADAMTSL4, ADGRG3, ADI1, ADNP, ADSL, AFF1, AFF4, AGPAT1, AK1, AKR1D1, AKT1, ALDH3B1, ALDH7A1, ALG11, ALPK3, ANK2, ANKRD52, ANXA4, APOA2, APOC1, APOC3, APP, APRT, ARF1, ARGLU1, ARHGAP35, ARHGEF11, ARID1B, ARNTL2, ARRB1, ASF1B, ASXL1, ASXL2, ATAD2, ATF7, ATN1, ATP1A1, ATP5G2, ATP5I, ATPIF1, AURKAIP1, AXIN1, AZIN1, B3GLCT, B4…
GO:0044260	cellular macromolecule metabolic process	GO_BiologicalProcess-GOA_09.02.2016_16h18	1e-15	4.9e-13	[3, 4]	8.62387	747	[A1CF, ABCA1, ABCA3, ABCF1, ABL1, ACADM, ACIN1, ACP1, ACSL1, ACTB, ADAMTSL4, ADD1, ADGRG3, ADH5, ADNP, ADSL, AFF1, AFF4, AHSG, AKT1, AKT1S1, ALG11, ALKBH5, ALPK3, ANAPC10, ANK2, ANKRD52, ANXA4, APH1A, APOA2, APOBEC3C, APP, ARAP1, ARF1, ARGLU1, ARHGAP35, ARHGEF11, ARID1B, ARIH2, ARNTL2, ARRB1, ARRDC3, ARSG, ARSI, ASB2, ASF1B, ASXL1, ASXL2, ATAD2, ATAT1, ATF7, ATN1, ATPIF1, AURKAIP1, AXIN1, AZGP1, …
GO:0006082	organic acid metabolic process	GO_BiologicalProcess-GOA_09.02.2016_16h18	2.6e-15	1e-12	[3, 4]	12.8475	171	[ABAT, ACAD9, ACADM, ACADS, ACLY, ACOT11, ACSL1, ACSL3, ACSL4, ACSS1, ADI1, ADSL, AKR1C1, AKR1C2, AKR1D1, AKT1, ALDH7A1, APOC1, APOC3, ATAT1, ATN1, ATPIF1, AZIN1, B4GALT2, BNIP2, BPGM, BPHL, BRCA1, C3, CHPF, CPS1, CSAD, CYGB, CYP21A2, CYP4F12, CYP4F2, DARS, DDAH1, DDC, DDIT4, DECR1, DHTKD1, DLST, DMGDH, DTD1, ECD, ECH1, ECHDC2, EDN1, EIF2AK3, EIF2B2, EIF2B4, ELOVL6, ENO1, ENOPH1, EPRS, ERLIN1, ER…
GO:0044267	cellular protein metabolic process	GO_BiologicalProcess-GOA_09.02.2016_16h18	4.4e-15	1.5e-12	[4, 5]	9.4167	494	[ABCA1, ABCA3, ABCF1, ABL1, ACP1, ACSL1, ACTB, ADAMTSL4, ADD1, ADH5, ADNP, ADSL, AHSG, AKT1, AKT1S1, ALG11, ALPK3, ANAPC10, ANK2, APH1A, APOA2, APP, ARIH2, ARRB1, ARRDC3, ARSG, ARSI, ASB2, ASXL1, ASXL2, ATAT1, ATN1, ATPIF1, AURKAIP1, AXIN1, B2M, B3GLCT, B4GALT2, BACH1, BAG1, BARD1, BAZ1B, BFAR, BLMH, BMP2K, BMP4, BNIP2, BNIP3, BRAF, BRCA1, BRIP1, BRMS1L, BUD31, C3, C3orf33, CAB39, CAMK2N1, CASC3,…
GO:0034641	cellular nitrogen compound metabolic process	GO_BiologicalProcess-GOA_09.02.2016_16h18	6.1e-15	1.8e-12	[3]	8.97893	605	[A1CF, ABAT, ABCA1, ABCF1, ABL1, ACADM, ACIN1, ACSL3, ADGRG3, ADI1, ADNP, ADSL, AFF1, AFF4, AK1, AKT1, ALDH7A1, ALKBH5, ALPK3, ANKRD52, ANXA4, APOA2, APOBEC3C, APOC1, APOC3, APP, APRT, ARGLU1, ARHGAP35, ARHGEF11, ARID1B, ARNTL2, ARRB1, ASF1B, ASXL1, ASXL2, ATAD2, ATAT1, ATF7, ATN1, ATP5G2, ATP5I, ATPIF1, AURKAIP1, AXIN1, AZGP1, AZIN1, BACH1, BAG1, BARD1, BAZ1A, BAZ1B, BLVRA, BLVRB, BMP4, BOD1L1, …
GO:0043436	oxoacid metabolic process	GO_BiologicalProcess-GOA_09.02.2016_16h18	1.2e-14	3.1e-12	[4, 5]	12.7384	167	[ABAT, ACAD9, ACADM, ACADS, ACLY, ACOT11, ACSL1, ACSL3, ACSL4, ACSS1, ADI1, ADSL, AKR1C1, AKR1C2, AKR1D1, AKT1, ALDH7A1, APOC1, APOC3, ATAT1, ATN1, ATPIF1, AZIN1, B4GALT2, BNIP2, BPGM, BPHL, BRCA1, C3, CHPF, CPS1, CSAD, CYGB, CYP21A2, CYP4F12, CYP4F2, DARS, DDAH1, DDC, DDIT4, DECR1, DHTKD1, DLST, DMGDH, DTD1, ECD, ECH1, ECHDC2, EDN1, EIF2AK3, EIF2B2, EIF2B4, ELOVL6, ENO1, ENOPH1, EPRS, ERLIN1, ER…
GO:0019752	carboxylic acid metabolic process	GO_BiologicalProcess-GOA_09.02.2016_16h18	1.5e-14	3.3e-12	[5, 6]	13.0691	155	[ABAT, ACAD9, ACADM, ACADS, ACLY, ACOT11, ACSL1, ACSL3, ACSL4, ACSS1, ADI1, ADSL, AKR1C1, AKR1C2, AKR1D1, AKT1, ALDH7A1, APOC1, APOC3, ATAT1, ATN1, ATPIF1, AZIN1, BPGM, BPHL, BRCA1, C3, CPS1, CSAD, CYGB, CYP21A2, CYP4F12, CYP4F2, DARS, DDAH1, DDC, DDIT4, DECR1, DHTKD1, DLST, DMGDH, DTD1, ECD, ECH1, ECHDC2, EDN1, EIF2AK3, EIF2B2, EIF2B4, ELOVL6, ENO1, ENOPH1, EPRS, ERLIN1, ERO1A, GATM, GCAT, GGT1,…
GO:1901360	organic cyclic compound metabolic process	GO_BiologicalProcess-GOA_09.02.2016_16h18	8.5e-14	1.7e-11	[3]	9.00398	565	[A1CF, ABAT, ABCA1, ABL1, ACIN1, ACLY, ADGRG3, ADNP, ADSL, AFF1, AFF4, AK1, AKR1B10, AKR1C1, AKR1C2, AKR1D1, AKT1, ALKBH5, ALPK3, ANKRD52, ANXA4, APOA2, APOBEC3C, APOC1, APOC3, APOF, APP, APRT, ARGLU1, ARHGAP35, ARHGEF11, ARID1B, ARNTL2, ARRB1, ASF1B, ASXL1, ASXL2, ATAD2, ATAT1, ATF7, ATN1, ATP1A1, ATP5G2, ATP5I, ATPIF1, AURKAIP1, AXIN1, AZGP1, BACH1, BAG1, BARD1, BAZ1A, BAZ1B, BLVRA, BLVRB, BMP4…
GO:0043933	macromolecular complex subunit organization	GO_BiologicalProcess-GOA_09.02.2016_16h18	9e-14	1.7e-11	[3]	10.567	287	[ABCA1, ABL1, ACAD9, ACADM, ACADS, ACSL3, ACTB, ADD1, ADSL, AKR1C1, ALMS1, ANLN, APOA2, APOC1, APOC3, APOM, ARAP1, ARF1, ARID1B, ARL4D, ARPC3, ARRB1, ASF1B, ASXL1, ASXL2, ATAD2, ATAT1, ATPAF1, ATPIF1, AURKAIP1, AXIN1, BAZ1A, BAZ1B, BNIP3, BPTF, BRAF, BRCA1, BRD2, BRMS1L, BUD31, C1QTNF6, CAB39, CAPZB, CCND1, CCT2, CD40, CDC42EP1, CDK1, CEP192, CEP57, CFL2, CHD4, CHD8, CHMP4B, CHRAC1, CHRNA2, CNIH1…
GO:1901564	organonitrogen compound metabolic process	GO_BiologicalProcess-GOA_09.02.2016_16h18	1.9e-13	3.4e-11	[3]	10.7839	260	[ABAT, ABCA1, ABCF1, ACADM, ACSL3, ADI1, ADNP, ADSL, AK1, AKT1, ALDH3B1, ALDH7A1, AOC3, APOA2, APOBEC3C, APOC1, APOC3, APP, APRT, ARSG, ARSI, ATAT1, ATN1, ATP5G2, ATP5I, ATPIF1, AURKAIP1, AZIN1, B4GALT2, BLVRA, BLVRB, BPGM, BPHL, BUD31, CASC3, CASK, CEP290, CERS2, CHDH, CHPF, CLIC4, CMPK1, CNOT3, CNOT6L, COA6, COQ7, COX5A, CPS1, CSAD, CSNK1G2, CTIF, CYP21A2, DARS, DCK, DDAH1, DDC, DDIT4, DDX3X, D…
GO:0006996	organelle organization	GO_BiologicalProcess-GOA_09.02.2016_16h18	2.1e-13	3.5e-11	[3]	9.80955	376	[ABCA1, ABL1, ACAD9, ACIN1, ACTB, ADD1, AFAP1, AKAP8, AKR1B10, AKT1, ALMS1, ANAPC10, ANLN, AP1G1, ARAP1, ARF1, ARHGEF11, ARHGEF28, ARID1B, ARIH2, ARL4D, ARPC3, ARRB1, ASB2, ASF1B, ASXL1, ASXL2, ATAD2, ATAT1, ATG2B, ATG9A, ATP8B2, ATPAF1, ATPIF1, AURKAIP1, AXIN1, BAZ1A, BAZ1B, BCL2L1, BLOC1S6, BMP4, BNIP2, BNIP3, BPTF, BRAF, BRCA1, BRD2, BRIP1, BRMS1L, BUD31, CAPZB, CCDC47, CCNA2, CCNB1IP1, CCND1,…
GO:0019538	protein metabolic process	GO_BiologicalProcess-GOA_09.02.2016_16h18	5.4e-13	8.4e-11	[3, 4]	9.03084	533	[ABCA1, ABCA3, ABCF1, ABL1, ACP1, ACSL1, ACTB, ADAMTSL4, ADD1, ADH5, ADNP, ADSL, AHSG, AKR1C1, AKT1, AKT1S1, ALG11, ALPK3, ANAPC10, ANK2, APH1A, APOA2, APOC1, APOC3, APOM, APP, ARIH2, ARRB1, ARRDC3, ARSG, ARSI, ASB2, ASXL1, ASXL2, ATAT1, ATN1, ATPIF1, AURKAIP1, AXIN1, AZIN1, B2M, B3GLCT, B4GALT2, BACH1, BAG1, BARD1, BAZ1B, BFAR, BLMH, BMP2K, BMP4, BNIP2, BNIP3, BRAF, BRCA1, BRIP1, BRMS1L, BUD31, …
GO:0044248	cellular catabolic process	GO_BiologicalProcess-GOA_09.02.2016_16h18	1.7e-12	2.3e-10	[3]	11.3344	203	[ABAT, ABL1, ACAD9, ACADM, ACADS, ACSL1, ADH5, ADSL, AKR1B10, AKR1D1, AKT1, ALDH3B1, ALDH7A1, ANAPC10, APOA2, APOBEC3C, APOC1, APOC3, ARIH2, ARRB1, ASB2, ATAT1, ATPIF1, AXIN1, BCL2L1, BFAR, BLVRA, BLVRB, BNIP2, BNIP3, BPGM, CAPN1, CASC3, CBL, CCDC47, CDK1, CHMP4B, CLPX, CNOT3, CNOT6L, CPS1, CPVL, CSAD, CTIF, CTSK, CTSL, CTSV, CUL7, CYLD, CYP21A2, CYP4F12, CYP4F2, DAB2IP, DAP, DDAH1, DDB1, DDIT4, …
GO:0043170	macromolecule metabolic process	GO_BiologicalProcess-GOA_09.02.2016_16h18	1.8e-12	2.3e-10	[3]	8.31645	780	[A1CF, ABCA1, ABCA3, ABCF1, ABL1, ACADM, ACIN1, ACP1, ACSL1, ACTA2, ACTB, ADAMTSL4, ADD1, ADGRG3, ADH5, ADNP, ADSL, AFF1, AFF4, AHSG, AKR1C1, AKT1, AKT1S1, ALG11, ALKBH5, ALPK3, ANAPC10, ANK2, ANKRD52, ANXA4, ANXA7, APH1A, APOA2, APOBEC3C, APOC1, APOC3, APOM, APP, ARAP1, ARF1, ARGLU1, ARHGAP35, ARHGEF11, ARID1B, ARIH2, ARNTL2, ARRB1, ARRDC3, ARSG, ARSI, ASB2, ASF1B, ASXL1, ASXL2, ATAD2, ATAT1, AT…
GO:0071822	protein complex subunit organization	GO_BiologicalProcess-GOA_09.02.2016_16h18	1.7e-12	2.4e-10	[4]	11.134	216	[ABL1, ACAD9, ACADM, ACADS, ADD1, ADSL, AKR1C1, ALMS1, ANLN, ARAP1, ARF1, ARL4D, ARPC3, ARRB1, ASF1B, ATAT1, ATPAF1, ATPIF1, AURKAIP1, AXIN1, BNIP3, BRAF, BRD2, BUD31, C1QTNF6, CAB39, CAPZB, CCT2, CD40, CDC42EP1, CDK1, CEP192, CEP57, CFL2, CHD4, CHMP4B, CHRNA2, CNIH1, COA6, COBLL1, COX20, CPSF6, CPSF7, CREBBP, CRTC2, CSNK2B, CYLD, DAB2IP, DARS, DBN1, DCTN6, DDIT4, DDX3X, DECR1, DKK1, DLC1, DLG1, …
GO:0046483	heterocycle metabolic process	GO_BiologicalProcess-GOA_09.02.2016_16h18	3.5e-12	4.3e-10	[3]	8.92502	538	[A1CF, ABCA1, ABL1, ACIN1, ADGRG3, ADNP, ADSL, AFF1, AFF4, AK1, AKT1, ALKBH5, ALPK3, ANKRD52, ANXA4, APOBEC3C, APOC3, APP, APRT, ARGLU1, ARHGAP35, ARHGEF11, ARID1B, ARNTL2, ARRB1, ASF1B, ASXL1, ASXL2, ATAD2, ATF7, ATN1, ATP5G2, ATP5I, ATPIF1, AURKAIP1, AXIN1, AZGP1, BACH1, BAG1, BARD1, BAZ1A, BAZ1B, BLVRA, BLVRB, BMP4, BOD1L1, BPGM, BPTF, BRCA1, BRD2, BRIP1, BRMS1L, BUD31, C3orf33, C8orf4, CA9, C…
GO:1901575	organic substance catabolic process	GO_BiologicalProcess-GOA_09.02.2016_16h18	9.7e-12	1.1e-09	[3]	10.9794	213	[ABAT, ACAD9, ACADM, ACADS, ADH4, ADH5, ADSL, AKR1B10, AKR1D1, AKT1, ALDH3B1, ALDH7A1, ANAPC10, APOA2, APOBEC3C, APOC1, APOC3, ARIH2, ARRB1, ASB2, ATAT1, ATPIF1, AXIN1, AZIN1, BARD1, BFAR, BLVRA, BLVRB, BNIP2, BNIP3, BPGM, CAPN1, CASC3, CBL, CCDC47, CDK1, CHMP4B, CLPX, CNOT3, CNOT6L, CPS1, CPVL, CSAD, CTIF, CTSK, CTSL, CTSV, CUL7, CYLD, CYP21A2, CYP4F12, CYP4F2, DAB2IP, DDAH1, DDB1, DDIT4, DDRGK1…
GO:0006725	cellular aromatic compound metabolic process	GO_BiologicalProcess-GOA_09.02.2016_16h18	1.3e-11	1.4e-09	[3]	8.8683	536	[A1CF, ABAT, ABCA1, ABL1, ACIN1, ADGRG3, ADNP, ADSL, AFF1, AFF4, AK1, AKT1, ALKBH5, ALPK3, ANKRD52, ANXA4, APOBEC3C, APOC3, APP, APRT, ARGLU1, ARHGAP35, ARHGEF11, ARID1B, ARNTL2, ARRB1, ASF1B, ASXL1, ASXL2, ATAD2, ATAT1, ATF7, ATN1, ATP5G2, ATP5I, ATPIF1, AURKAIP1, AXIN1, AZGP1, BACH1, BAG1, BARD1, BAZ1A, BAZ1B, BLVRA, BLVRB, BMP4, BOD1L1, BPGM, BPTF, BRCA1, BRD2, BRIP1, BRMS1L, BUD31, C3orf33, C…
GO:0009059	macromolecule biosynthetic process	GO_BiologicalProcess-GOA_09.02.2016_16h18	1.9e-11	2e-09	[4]	9.01837	486	[ABCA1, ABCF1, ABL1, ACADM, ADAMTSL4, ADGRG3, ADNP, AFF1, AFF4, AKT1, ALG11, ALPK3, ANK2, ANKRD52, ANXA4, APOA2, APP, ARGLU1, ARHGAP35, ARHGEF11, ARID1B, ARNTL2, ARRB1, ASF1B, ASXL1, ASXL2, ATAD2, ATF7, ATN1, AURKAIP1, AXIN1, B3GLCT, B4GALT2, BACH1, BAG1, BAZ1A, BAZ1B, BMP4, BOD1L1, BPTF, BRCA1, BRD2, BRIP1, BRMS1L, BUD31, C3orf33, C8orf4, CA9, CASC3, CASK, CBL, CBX5, CC2D1A, CCDC126, CCNA2, CCND…
GO:0016071	mRNA metabolic process	GO_BiologicalProcess-GOA_09.02.2016_16h18	1.9e-11	2.1e-09	[5, 6, 7]	14.3731	94	[A1CF, ACIN1, ALKBH5, APP, BARD1, BUD31, CASC3, CDK12, CDK13, CEBPG, CELF5, CNOT3, CNOT6L, CPSF1, CPSF6, CPSF7, CTIF, DAZAP1, DDX5, DHX35, DHX38, DKC1, DNAJC8, EIF4B, EIF4E, EIF4G1, ERCC2, ESRP2, EXOSC7, GSPT1, GTF2H3, HNRNPH1, HNRNPK, IWS1, LSM1, LSM5, LUC7L3, MBNL1, MLH1, NOL3, NUDT21, PABPC1, PPIL3, PPP2R1A, PRMT7, PSPC1, PTBP1, RBM10, RBM15, RBM23, RBM25, RPL10, RPL13, RPL15, RPL18, RPL23A, R…
GO:0006139	nucleobase-containing compound metabolic process	GO_BiologicalProcess-GOA_09.02.2016_16h18	3.7e-11	3.6e-09	[3, 4]	8.87442	518	[A1CF, ABCA1, ABL1, ACIN1, ADGRG3, ADNP, ADSL, AFF1, AFF4, AK1, AKT1, ALKBH5, ALPK3, ANKRD52, ANXA4, APOBEC3C, APOC3, APP, APRT, ARGLU1, ARHGAP35, ARHGEF11, ARID1B, ARNTL2, ARRB1, ASF1B, ASXL1, ASXL2, ATAD2, ATF7, ATN1, ATP5G2, ATP5I, ATPIF1, AURKAIP1, AXIN1, AZGP1, BACH1, BAG1, BARD1, BAZ1A, BAZ1B, BMP4, BOD1L1, BPGM, BPTF, BRCA1, BRD2, BRIP1, BRMS1L, BUD31, C3orf33, C8orf4, CA9, CASC3, CASK, CB…
GO:0034645	cellular macromolecule biosynthetic process	GO_BiologicalProcess-GOA_09.02.2016_16h18	3.8e-11	3.6e-09	[4, 5]	9.03349	472	[ABCA1, ABCF1, ABL1, ACADM, ADAMTSL4, ADGRG3, ADNP, AFF1, AFF4, AKT1, ALG11, ALPK3, ANK2, ANKRD52, ANXA4, APP, ARGLU1, ARHGAP35, ARHGEF11, ARID1B, ARNTL2, ARRB1, ASF1B, ASXL1, ASXL2, ATAD2, ATF7, ATN1, AURKAIP1, AXIN1, B3GLCT, B4GALT2, BACH1, BAG1, BAZ1A, BAZ1B, BMP4, BOD1L1, BPTF, BRCA1, BRD2, BRIP1, BRMS1L, BUD31, C3orf33, C8orf4, CA9, CASC3, CASK, CBL, CBX5, CC2D1A, CCDC126, CCNA2, CCND1, CCT2…
GO:0007049	cell cycle	GO_BiologicalProcess-GOA_09.02.2016_16h18	6.7e-11	6.1e-09	[3]	10.88	204	[ABCB1, ABL1, AK1, AKAP8, AKT1, ALMS1, ALPK3, ANAPC10, ANLN, APP, ARAP1, ARHGEF11, AURKAIP1, AZI2, BACH1, BARD1, BCL2L1, BMP4, BRCA1, BRIP1, C8orf4, CAB39, CABLES1, CAMK2N1, CCNA2, CCNB1IP1, CCND1, CDC25A, CDK1, CDK12, CDK13, CDKN1A, CDT1, CEP192, CEP290, CEP57, CHD4, CHMP4B, CKS2, CREBBP, CSNK2B, CTDNEP1, CUL7, CYLD, DAB2IP, DCTN6, DDB1, DDX3X, DLG1, DTL, DUSP1, DYNC1H1, E2F1, ECD, ECT2, EDN1, E…
GO:0044271	cellular nitrogen compound biosynthetic process	GO_BiologicalProcess-GOA_09.02.2016_16h18	9e-11	7.9e-09	[4]	9.04932	455	[ABCA1, ABCF1, ABL1, ACADM, ADGRG3, ADNP, ADSL, AFF1, AFF4, AK1, AKT1, ALDH7A1, ALPK3, ANKRD52, ANXA4, APP, APRT, ARGLU1, ARHGAP35, ARHGEF11, ARID1B, ARNTL2, ARRB1, ASF1B, ASXL1, ASXL2, ATAD2, ATF7, ATN1, ATP5G2, ATP5I, ATPIF1, AURKAIP1, AXIN1, AZIN1, BACH1, BAG1, BAZ1A, BAZ1B, BMP4, BPTF, BRCA1, BRD2, BRIP1, BRMS1L, BUD31, C3orf33, C8orf4, CA9, CASC3, CASK, CBL, CBX5, CC2D1A, CCNA2, CCND1, CCT2,…
GO:1902582	single-organism intracellular transport	GO_BiologicalProcess-GOA_09.02.2016_16h18	1.4e-10	1.1e-08	[4, 5]	10.8731	198	[ABCA1, ABL1, ACSL3, AKR1B10, AKT1, ALKBH5, ALMS1, ANK2, AP1G1, AP1S2, APP, ARF1, ARFRP1, ARIH2, ARL4D, ARRB1, ATP5G2, ATP5I, ATPIF1, AURKAIP1, AXIN1, BARD1, BCL2L1, BLOC1S6, BMP4, BNIP3, BRAF, BRCA1, C8orf4, CDK1, CDKN1A, CEP57, CHCHD2, CHMP4B, CLSTN1, CNIH1, COG2, COPZ1, CPSF1, CRY2, CSE1L, CTSK, CYLD, DAB2IP, DCTN6, DDX58, DHX38, DMTN, DOPEY2, DPYSL2, DYNC1H1, E2F1, ECT2, EIF4E, EIF5A, EIF6, E…
GO:0022402	cell cycle process	GO_BiologicalProcess-GOA_09.02.2016_16h18	1.3e-10	1.1e-08	[3, 4]	11.5607	160	[ABCB1, ABL1, AK1, AKAP8, AKT1, ALMS1, ANAPC10, ANLN, APP, ARAP1, ARHGEF11, AURKAIP1, BACH1, BARD1, BCL2L1, BMP4, BRCA1, BRIP1, C8orf4, CAB39, CCNA2, CCNB1IP1, CCND1, CDC25A, CDK1, CDK13, CDKN1A, CDT1, CEP192, CEP290, CEP57, CHD4, CHMP4B, CKS2, CREBBP, CTDNEP1, CUL7, DAB2IP, DCTN6, DDB1, DDX3X, DLG1, DTL, DUSP1, DYNC1H1, E2F1, ECD, ECT2, EDN1, EIF4E, EIF4G2, EP300, ERCC2, EZR, FANCI, FOXO4, GDNF,…
GO:0033554	cellular response to stress	GO_BiologicalProcess-GOA_09.02.2016_16h18	3e-10	2.3e-08	[3]	10.5547	215	[ABL1, ACIN1, ADD1, AKT1, AKT1S1, ALDH3B1, ASB2, ATPIF1, AXIN1, BACH1, BAG1, BARD1, BAZ1B, BCL2L1, BFAR, BMP4, BNIP3, BOD1L1, BRAF, BRCA1, BRIP1, C8orf4, CA9, CAB39, CCDC47, CCNA2, CCND1, CDK1, CDKN1A, CEBPG, CHCHD2, CHCHD6, CHMP4B, COPS2, COQ7, CREB3L3, CREBBP, CRKL, CRY2, CTSK, CTSV, CUL7, DAB2IP, DAP, DDB1, DDIT4, DDRGK1, DDX3X, DDX5, DLC1, DLG1, DNAJB1, DNAJB11, DNAJB2, DTL, DUSP10, E2F1, ECT…
GO:1903047	mitotic cell cycle process	GO_BiologicalProcess-GOA_09.02.2016_16h18	5e-10	3.8e-08	[4, 5]	12.5958	115	[ABCB1, ABL1, AKAP8, AKT1, ALMS1, ANAPC10, ANLN, APP, AURKAIP1, BACH1, BCL2L1, BMP4, BRIP1, CCNA2, CCND1, CDC25A, CDK1, CDK13, CDKN1A, CDT1, CEP192, CEP290, CEP57, CHMP4B, CREBBP, CTDNEP1, CUL7, DCTN6, DDB1, DDX3X, DLG1, DUSP1, DYNC1H1, E2F1, ECD, EDN1, EIF4E, EP300, ERCC2, FANCI, FOXO4, GDNF, GFI1, GIGYF2, GINS1, GSPT1, HAUS6, ITGB3BP, KIF23, KLHL42, LIG1, LIN54, MAPRE2, MCM10, MCM2, MCM7, MDC1,…
GO:0065003	macromolecular complex assembly	GO_BiologicalProcess-GOA_09.02.2016_16h18	6.7e-10	5e-08	[4]	10.8696	185	[ABCA1, ABL1, ACAD9, ACADM, ACADS, ACSL3, ADD1, ADSL, AKR1C1, ANLN, APOA2, APOC1, APOC3, APOM, ARF1, ARL4D, ARPC3, ASF1B, ATAT1, ATPAF1, ATPIF1, AXIN1, BRAF, BRD2, C1QTNF6, CAB39, CAPZB, CCT2, CD40, CDC42EP1, CDK1, CEP192, CEP57, CHD4, CHMP4B, CHRNA2, CNIH1, CNOT6L, COA6, COBLL1, COX20, CPSF6, CPSF7, CREBBP, CRTC2, CSNK2B, CYLD, DAB2IP, DARS, DDX3X, DECR1, DKK1, DLG1, DMTN, DNAJB11, DYNC1H1, ECT2…
GO:0071702	organic substance transport	GO_BiologicalProcess-GOA_09.02.2016_16h18	7.1e-10	5.1e-08	[4]	9.89451	272	[ABAT, ABCA1, ABCA3, ABCG5, ABL1, ACSL1, ACSL3, ACSL4, AKR1C1, AKT1, ALKBH5, ANK2, ANXA4, AP1G1, AP1S2, APOA2, APOC1, APOC3, APOF, APOM, ARF1, ARFRP1, ARIH2, ARL4D, ARRB1, ATG9A, ATP6V0E1, ATP8B2, ATPIF1, AURKAIP1, AXIN1, AZGP1, AZIN1, BARD1, BLOC1S6, BMP4, BRAF, BRCA1, BTN2A2, C3, C8orf4, CA9, CACNA1D, CASC3, CD40, CDK1, CDKN1A, CEP290, CEP57, CHCHD2, CHMP4B, COG2, COPZ1, CPSF1, CRY2, CSE1L, CTS…
GO:0055114	oxidation-reduction process	GO_BiologicalProcess-GOA_09.02.2016_16h18	7.7e-10	5.4e-08	[3]	11.8205	137	[ACAD9, ACADM, ACADS, ACLY, ACSS1, ADH4, ADH5, ADI1, ADSL, AGPAT1, AKR1B10, AKR1C1, AKR1C2, AKR1D1, AKR7A2, AKT1, ALDH16A1, ALDH3B1, ALDH7A1, ALKBH5, AOC3, APOA2, APOM, ATP5G2, ATP5I, BLVRA, BLVRB, BNIP3, C1orf43, CACNA1D, CHDH, COA6, COQ7, COX20, COX5A, COX7A2L, COX7C, CPS1, CYC1, CYGB, CYP19A1, CYP21A2, CYP4F12, CYP4F2, DECR1, DHODH, DHRS11, DHTKD1, DIDO1, DLST, DMGDH, ECH1, ENO1, ERO1A, FAR1, …
GO:0044765	single-organism transport	GO_BiologicalProcess-GOA_09.02.2016_16h18	2.1e-09	1.4e-07	[3, 4]	9.14986	381	[ABAT, ABCA1, ABCA3, ABCB1, ABCF1, ABCG5, ABL1, ACSL1, ACSL3, ACSL4, ACTB, ADD1, ADD3, AHSG, AKR1B10, AKR1C1, AKT1, ALKBH5, ALMS1, ANK2, ANXA4, AP1G1, AP1S2, APOA2, APOC1, APOC3, APOF, APOM, APP, APRT, ARF1, ARFRP1, ARIH2, ARL4D, ARMC1, ARPC3, ARRB1, ATP1A1, ATP5G2, ATP5I, ATP6V0E1, ATP8B2, ATPIF1, AURKAIP1, AXIN1, AZGP1, AZIN1, B2M, BARD1, BCL2L1, BLOC1S6, BMP4, BNIP3, BRAF, BRCA1, BTN2A2, C12or…
GO:0010467	gene expression	GO_BiologicalProcess-GOA_09.02.2016_16h18	2.8e-09	1.8e-07	[4]	8.7566	481	[A1CF, ABCF1, ABL1, ACIN1, ACTA2, ACTB, ADGRG3, ADNP, AFF1, AFF4, AKR1C1, AKT1, ALKBH5, ALPK3, ANK2, ANKRD52, ANXA4, ANXA7, APH1A, APP, ARGLU1, ARHGAP35, ARHGEF11, ARID1B, ARNTL2, ARRB1, ASF1B, ASXL1, ASXL2, ATAD2, ATF7, ATN1, AURKAIP1, AXIN1, BACH1, BAG1, BARD1, BAZ1A, BAZ1B, BMP4, BPTF, BRAF, BRCA1, BRD2, BRIP1, BRMS1L, BUD31, C3, C3orf33, C8orf4, CA9, CASC3, CASK, CBL, CBX5, CC2D1A, CCNA2, CCN…
GO:0000278	mitotic cell cycle	GO_BiologicalProcess-GOA_09.02.2016_16h18	3.3e-09	2e-07	[4]	11.7972	128	[ABCB1, ABL1, AKAP8, AKT1, ALMS1, ANAPC10, ANLN, APP, AURKAIP1, AZI2, BACH1, BCL2L1, BMP4, BRIP1, CCNA2, CCND1, CDC25A, CDK1, CDK13, CDKN1A, CDT1, CEP192, CEP290, CEP57, CHMP4B, CREBBP, CSNK2B, CTDNEP1, CUL7, CYLD, DCTN6, DDB1, DDX3X, DLG1, DUSP1, DYNC1H1, E2F1, ECD, EDN1, EIF4E, EP300, ERCC2, ESCO2, FANCI, FOXO4, GBF1, GDNF, GFI1, GIGYF2, GINS1, GINS3, GSPT1, HAUS6, ITGB3BP, KIF23, KLHL42, LIG1,…
GO:0043412	macromolecule modification	GO_BiologicalProcess-GOA_09.02.2016_16h18	3.4e-09	2e-07	[4]	9.0995	385	[A1CF, ABCA1, ABL1, ACP1, ACSL1, ADAMTSL4, ADH5, ADNP, ADSL, AKT1, AKT1S1, ALG11, ALKBH5, ALPK3, ANAPC10, ANK2, APOA2, APOBEC3C, APP, ARIH2, ARRB1, ARRDC3, ARSG, ARSI, ASB2, ASXL1, ASXL2, ATAT1, AURKAIP1, AXIN1, B3GLCT, B4GALT2, BACH1, BAG1, BARD1, BAZ1B, BFAR, BLMH, BMP2K, BMP4, BNIP2, BRAF, BRCA1, BRIP1, BRMS1L, BUD31, C3, C3orf33, CAB39, CAMK2N1, CASK, CBL, CCDC126, CCDC6, CCL16, CCNA2, CCNB1I…
GO:0090304	nucleic acid metabolic process	GO_BiologicalProcess-GOA_09.02.2016_16h18	3.7e-09	2.2e-07	[4, 5]	8.81167	459	[A1CF, ABL1, ACIN1, ADGRG3, ADNP, AFF1, AFF4, AKT1, ALKBH5, ALPK3, ANKRD52, ANXA4, APOBEC3C, APP, ARGLU1, ARHGAP35, ARHGEF11, ARID1B, ARNTL2, ARRB1, ASF1B, ASXL1, ASXL2, ATAD2, ATF7, ATN1, AURKAIP1, AXIN1, AZGP1, BACH1, BAG1, BARD1, BAZ1A, BAZ1B, BMP4, BOD1L1, BPTF, BRCA1, BRD2, BRIP1, BRMS1L, BUD31, C3orf33, C8orf4, CA9, CASC3, CASK, CBL, CBX5, CC2D1A, CCNA2, CCNB1IP1, CCND1, CCT2, CD40, CDC25A,…
GO:0044265	cellular macromolecule catabolic process	GO_BiologicalProcess-GOA_09.02.2016_16h18	4.9e-09	2.9e-07	[4, 5]	12.0494	117	[AKT1, ANAPC10, ARIH2, ARRB1, ASB2, ATPIF1, AXIN1, BFAR, BNIP3, CASC3, CBL, CCDC47, CDK1, CHMP4B, CLPX, CNOT3, CNOT6L, CPVL, CTIF, CTSK, CTSL, CTSV, CUL7, CYLD, DAB2IP, DDB1, DDRGK1, DNAJB2, DTL, DUSP1, EIF4B, EIF4E, EIF4G1, ERLIN1, EXOSC7, EZR, GAN, GSPT1, HECTD4, HUWE1, KLHL42, KPNA1, LRRK2, LSM1, LSM5, MLH1, MVB12B, NEDD4L, NFE2L2, NGLY1, PABPC1, PBK, PPP2R1A, PPT1, PSEN1, PSMA3, PSMA5, PSMA7,…
GO:1902589	single-organism organelle organization	GO_BiologicalProcess-GOA_09.02.2016_16h18	5.3e-09	3e-07	[3, 4]	9.7063	271	[ABL1, ACIN1, ADD1, AKAP8, AKT1, ALMS1, ANAPC10, ANLN, ARAP1, ARF1, ARHGEF11, ARHGEF28, ARL4D, ARPC3, ARRB1, ASB2, ASXL1, ASXL2, ATAT1, ATG2B, ATG9A, ATPIF1, AURKAIP1, AXIN1, BAZ1B, BCL2L1, BMP4, BNIP2, BNIP3, BRAF, BRCA1, BRMS1L, BUD31, CAPZB, CCNA2, CCNB1IP1, CCT2, CDC25A, CDC42BPA, CDC42EP1, CDK1, CDK13, CEP192, CEP290, CEP57, CFL2, CHCHD6, CHD4, CHMP4B, CKS2, CNIH1, COBLL1, COPZ1, COQ7, CREBB…
GO:0070271	protein complex biogenesis	GO_BiologicalProcess-GOA_09.02.2016_16h18	6.2e-09	3.4e-07	[3]	11.0028	158	[ABL1, ACAD9, ACADM, ACADS, ADD1, ADSL, AKR1C1, ANLN, ARF1, ARL4D, ARPC3, ASF1B, ATAT1, ATPAF1, ATPIF1, AXIN1, BRAF, BRD2, C1QTNF6, CAB39, CAPZB, CCT2, CD40, CDC42EP1, CDK1, CEP192, CEP57, CHD4, CHMP4B, CHRNA2, CNIH1, COA6, COBLL1, COX20, CPSF6, CPSF7, CREBBP, CRTC2, CSNK2B, CYLD, DAB2IP, DARS, DDX3X, DECR1, DKK1, DLG1, DMTN, DNAJB11, ECT2, EIF2AK3, EPRS, EXOC8, F5, FAM21C, FKBPL, GDNF, GJB1, GMF…
GO:0006461	protein complex assembly	GO_BiologicalProcess-GOA_09.02.2016_16h18	6.2e-09	3.4e-07	[4, 5]	11.0028	158	[ABL1, ACAD9, ACADM, ACADS, ADD1, ADSL, AKR1C1, ANLN, ARF1, ARL4D, ARPC3, ASF1B, ATAT1, ATPAF1, ATPIF1, AXIN1, BRAF, BRD2, C1QTNF6, CAB39, CAPZB, CCT2, CD40, CDC42EP1, CDK1, CEP192, CEP57, CHD4, CHMP4B, CHRNA2, CNIH1, COA6, COBLL1, COX20, CPSF6, CPSF7, CREBBP, CRTC2, CSNK2B, CYLD, DAB2IP, DARS, DDX3X, DECR1, DKK1, DLG1, DMTN, DNAJB11, ECT2, EIF2AK3, EPRS, EXOC8, F5, FAM21C, FKBPL, GDNF, GJB1, GMF…
GO:0036211	protein modification process	GO_BiologicalProcess-GOA_09.02.2016_16h18	1.1e-08	5.9e-07	[4, 5]	9.08196	369	[ABCA1, ABL1, ACP1, ACSL1, ADAMTSL4, ADH5, ADNP, ADSL, AKT1, AKT1S1, ALG11, ALPK3, ANAPC10, ANK2, APOA2, APP, ARIH2, ARRB1, ARRDC3, ARSG, ARSI, ASB2, ASXL1, ASXL2, ATAT1, AURKAIP1, AXIN1, B3GLCT, B4GALT2, BACH1, BAG1, BARD1, BAZ1B, BFAR, BLMH, BMP2K, BMP4, BNIP2, BRAF, BRCA1, BRIP1, BRMS1L, BUD31, C3, C3orf33, CAB39, CAMK2N1, CASK, CBL, CCDC126, CCDC6, CCL16, CCNA2, CCNB1IP1, CCND1, CD40, CDC25A,…
GO:0006464	cellular protein modification process	GO_BiologicalProcess-GOA_09.02.2016_16h18	1.1e-08	5.9e-07	[5, 6]	9.08196	369	[ABCA1, ABL1, ACP1, ACSL1, ADAMTSL4, ADH5, ADNP, ADSL, AKT1, AKT1S1, ALG11, ALPK3, ANAPC10, ANK2, APOA2, APP, ARIH2, ARRB1, ARRDC3, ARSG, ARSI, ASB2, ASXL1, ASXL2, ATAT1, AURKAIP1, AXIN1, B3GLCT, B4GALT2, BACH1, BAG1, BARD1, BAZ1B, BFAR, BLMH, BMP2K, BMP4, BNIP2, BRAF, BRCA1, BRIP1, BRMS1L, BUD31, C3, C3orf33, CAB39, CAMK2N1, CASK, CBL, CCDC126, CCDC6, CCL16, CCNA2, CCNB1IP1, CCND1, CD40, CDC25A,…
GO:0016482	cytoplasmic transport	GO_BiologicalProcess-GOA_09.02.2016_16h18	1.1e-08	5.9e-07	[5]	11.1195	147	[ABL1, ACSL3, AKR1B10, AKT1, ALKBH5, ANK2, AP1G1, ARF1, ARFRP1, ARIH2, ATPIF1, AURKAIP1, AXIN1, BARD1, BLOC1S6, BMP4, BRCA1, C8orf4, CDK1, CDKN1A, CEP57, CHCHD2, CHMP4B, CNIH1, COG2, COPZ1, CPSF1, CRY2, CSE1L, CTSK, CYLD, DAB2IP, DCTN6, DDX58, DHX38, DOPEY2, DYNC1H1, ECT2, EIF4E, EIF5A, EIF6, EMP2, ERO1A, EZR, F5, FAM160A2, FAM21C, GBF1, GNPTAB, GOLPH3, GSTO1, HHEX, HMGXB4, HSPA4, HUWE1, HYOU1, I…
GO:0016032	viral process	GO_BiologicalProcess-GOA_09.02.2016_16h18	1.7e-08	8.7e-07	[3, 4]	12.2619	103	[AP1G1, AP1S2, APOA2, APOBEC3C, ARF1, ATF7, B2M, BCL2L1, BNIP3, CBX5, CCNA2, CDHR3, CDK13, CHMP4B, CREBBP, CRTC2, CUL7, DDB1, DDX3X, DDX5, DDX58, DLG1, EIF4E, EIF4G1, EIF4H, EP300, ERCC2, FDPS, GBF1, GFI1, GTF2E2, GTF2H3, HAVCR1, HCFC1, HLA-A, HNRNPK, HPN, HS3ST5, ITGAV, KARS, KDM4A, KPNA1, LAMP1, LYN, MVB12B, NEDD4L, NUP107, NUP155, NUP210, NUP37, NUP58, NXF1, OAS1, P4HB, PABPC1, PSMA3, PSMA5, P…
GO:0046907	intracellular transport	GO_BiologicalProcess-GOA_09.02.2016_16h18	1.8e-08	8.9e-07	[4]	10.1908	203	[ABCA1, ABL1, ACSL3, AKR1B10, AKT1, ALKBH5, ALMS1, ANK2, AP1G1, AP1S2, APP, ARF1, ARFRP1, ARIH2, ARL4D, ARRB1, ATP5G2, ATP5I, ATPIF1, AURKAIP1, AXIN1, BARD1, BCL2L1, BLOC1S6, BMP4, BNIP3, BRAF, BRCA1, C8orf4, CDK1, CDKN1A, CEP290, CEP57, CHCHD2, CHMP4B, CLSTN1, CNIH1, COG2, COPZ1, CPSF1, CRY2, CSE1L, CTSK, CYLD, DAB2IP, DCTN6, DDX58, DHX38, DMTN, DOPEY2, DPYSL2, DYNC1H1, E2F1, ECT2, EIF4E, EIF5A,…
GO:0006520	cellular amino acid metabolic process	GO_BiologicalProcess-GOA_09.02.2016_16h18	1.9e-08	9.1e-07	[3, 4, 6, 7]	13.6201	76	[ABAT, ADI1, ADSL, ALDH7A1, ATAT1, ATN1, ATPIF1, AZIN1, BPHL, CPS1, CSAD, CYP21A2, DARS, DDAH1, DDC, DLST, DMGDH, DTD1, EIF2B2, EIF2B4, ENOPH1, EPRS, ERO1A, GATM, GCAT, GGT1, GNMT, GOT1, GSTZ1, HPN, IARS, IARS2, IVD, KARS, MAT1A, MPST, MTHFD1, MTR, NIT2, NQO1, OGDH, P4HB, PFAS, PIPOX, PPM1K, PRODH2, PSAT1, PSMA3, PSMA5, PSMA7, PSMB4, PSMC5, PSME3, RPL10, RPL13, RPL15, RPL18, RPL23A, RPL31, RPL34,…
GO:0016070	RNA metabolic process	GO_BiologicalProcess-GOA_09.02.2016_16h18	1.9e-08	9.1e-07	[4, 5, 6]	8.85617	415	[A1CF, ABL1, ACIN1, ADGRG3, ADNP, AFF1, AFF4, AKT1, ALKBH5, ALPK3, ANKRD52, ANXA4, APP, ARGLU1, ARHGAP35, ARHGEF11, ARID1B, ARNTL2, ARRB1, ASF1B, ASXL1, ASXL2, ATAD2, ATF7, ATN1, AURKAIP1, AXIN1, AZGP1, BACH1, BAG1, BARD1, BAZ1A, BAZ1B, BMP4, BPTF, BRCA1, BRD2, BRIP1, BRMS1L, BUD31, C3orf33, C8orf4, CA9, CASC3, CASK, CBL, CBX5, CC2D1A, CCNA2, CCND1, CD40, CDCA7, CDCA7L, CDK1, CDK12, CDK13, CDT1, …
GO:0070727	cellular macromolecule localization	GO_BiologicalProcess-GOA_09.02.2016_16h18	2e-08	9.3e-07	[3]	10.5846	172	[A1CF, ACSL3, AKR1B10, AKT1, ANK2, AP1G1, AP1S2, ARFRP1, ARIH2, ARL4D, ASTN2, ATG9A, ATPIF1, AURKAIP1, AXIN1, BAG1, BARD1, BCL2L1, BMP4, BRAF, BRCA1, C8orf4, CASC3, CCT2, CDK1, CDKN1A, CEP290, CEP57, CHCHD2, CHMP4B, COPZ1, CRY2, CSE1L, CTDNEP1, CTSK, CYLD, DAB2IP, DBN1, DDX58, DKC1, DLG1, DMTN, DNAJA3, E2F1, ECT2, EIF2AK3, EIF5A, EMP2, ESCO2, EXOC8, EZR, GBF1, GNPTAB, GOLPH3, GPAA1, GPD1L, HHEX, …
GO:0061024	membrane organization	GO_BiologicalProcess-GOA_09.02.2016_16h18	2.3e-08	1e-06	[3]	11.2999	133	[ABCA1, ACSL3, ACTB, AKT1, ANK2, ANXA7, AP1G1, AP1S2, APP, ARF1, ARFRP1, ARL4D, ARRB1, ATG9A, ATP8B2, ATPIF1, BCL2L1, BLOC1S6, BNIP3, BRAF, CDK1, CHCHD6, CHMP4B, CNIH1, COG2, COPZ1, CTDNEP1, DCTN6, DLG1, DMTN, DNAJA3, DYNC1H1, E2F1, EMP2, EXOC8, EZR, F5, FAT4, GBF1, GDNF, GJB1, GNAI3, GOLPH3, HSPA4, IKBKB, KIF3A, LIN7C, LRP4, LYPLA1, LYPLAL1, MIA3, MIEF1, MPP2, MTSS1, MTSS1L, MYH10, MYO18A, NAPB,…
GO:0009892	negative regulation of metabolic process	GO_BiologicalProcess-GOA_09.02.2016_16h18	2.7e-08	1.1e-06	[2, 3, 4]	9.55595	269	[ABL1, ACIN1, ADGRG3, ADNP, AHSG, AKT1, AKT1S1, ANAPC10, ANKRD52, ANXA4, ANXA7, APOA2, APOC1, APOC3, APOM, APP, ARHGAP35, ARRB1, ARRDC3, ASXL1, ASXL2, ATAD2, ATF7, ATN1, ATP1A1, ATPIF1, AURKAIP1, AXIN1, AZIN1, BACH1, BAG1, BARD1, BCL2L1, BMP4, BNIP3, BPTF, BRCA1, BRIP1, BRMS1L, BTN2A2, BUD31, C3, C3orf33, CAMK2N1, CBX5, CC2D1A, CCND1, CDKN1A, CEBPG, CEP192, CHD4, CHD8, CHMP4B, CNOT3, CNOT6L, COPS…
GO:1901362	organic cyclic compound biosynthetic process	GO_BiologicalProcess-GOA_09.02.2016_16h18	2.7e-08	1.2e-06	[4]	8.85473	409	[ABCA1, ABL1, ACLY, ADGRG3, ADNP, ADSL, AFF1, AFF4, AK1, AKR1D1, AKT1, ALPK3, ANKRD52, ANXA4, APP, APRT, ARGLU1, ARHGAP35, ARHGEF11, ARID1B, ARNTL2, ARRB1, ASF1B, ASXL1, ASXL2, ATAD2, ATF7, ATN1, ATP1A1, ATP5G2, ATP5I, ATPIF1, AURKAIP1, AXIN1, BACH1, BAG1, BAZ1A, BAZ1B, BMP4, BPTF, BRCA1, BRD2, BRIP1, BRMS1L, BUD31, C3orf33, C8orf4, CA9, CASK, CBL, CBX5, CC2D1A, CCNA2, CCND1, CCT2, CD40, CDCA7, C…
GO:0008104	protein localization	GO_BiologicalProcess-GOA_09.02.2016_16h18	3.6e-08	1.4e-06	[3]	9.68372	248	[ABAT, ABCA1, ABL1, ACSL3, AKR1B10, AKT1, ANK2, ANXA4, AP1G1, AP1S2, APOA2, APOC3, ARF1, ARFRP1, ARIH2, ARL4D, ARRB1, ASTN2, ATG9A, ATP6V0E1, ATPIF1, AURKAIP1, AXIN1, AZGP1, BAG1, BARD1, BCL2L1, BLOC1S6, BMP4, BRAF, BRCA1, BTN2A2, C8orf4, CACNA1D, CCT2, CD40, CDK1, CDKN1A, CEP290, CEP57, CHCHD2, CHMP4B, CLSTN3, COG2, COPZ1, CRY2, CSE1L, CTDNEP1, CTSK, CYLD, DAB2IP, DBN1, DDX58, DKC1, DLG1, DMTN, …
GO:0034613	cellular protein localization	GO_BiologicalProcess-GOA_09.02.2016_16h18	3.6e-08	1.4e-06	[4]	10.5263	170	[ACSL3, AKR1B10, AKT1, ANK2, AP1G1, AP1S2, ARFRP1, ARIH2, ARL4D, ASTN2, ATG9A, ATPIF1, AURKAIP1, AXIN1, BAG1, BARD1, BCL2L1, BMP4, BRAF, BRCA1, C8orf4, CCT2, CDK1, CDKN1A, CEP290, CEP57, CHCHD2, CHMP4B, COPZ1, CRY2, CSE1L, CTDNEP1, CTSK, CYLD, DAB2IP, DBN1, DDX58, DKC1, DLG1, DMTN, DNAJA3, E2F1, ECT2, EIF2AK3, EIF5A, EMP2, ESCO2, EXOC8, EZR, GBF1, GNPTAB, GOLPH3, GPAA1, GPD1L, HHEX, HNRNPK, HOMER…
GO:0009057	macromolecule catabolic process	GO_BiologicalProcess-GOA_09.02.2016_16h18	3.4e-08	1.4e-06	[4]	11.1567	136	[AKT1, ANAPC10, ARIH2, ARRB1, ASB2, ATPIF1, AXIN1, AZIN1, BARD1, BFAR, BNIP3, CAPN1, CASC3, CBL, CCDC47, CDK1, CHMP4B, CLPX, CNOT3, CNOT6L, CPS1, CPVL, CTIF, CTSK, CTSL, CTSV, CUL7, CYLD, CYP21A2, DAB2IP, DDB1, DDRGK1, DNAJB2, DTL, DUSP1, EIF4B, EIF4E, EIF4G1, ERLIN1, EXOSC7, EZR, G6PC, GAN, GPC3, GPLD1, GSPT1, HECTD4, HUWE1, KLHL42, KPNA1, LPCAT1, LRRK2, LSM1, LSM5, LYPLA1, LYPLAL1, MLH1, MVB12B…
GO:0006810	transport	GO_BiologicalProcess-GOA_09.02.2016_16h18	3.5e-08	1.4e-06	[3]	8.80371	418	[ABAT, ABCA1, ABCA3, ABCB1, ABCF1, ABCG5, ABL1, ACSL1, ACSL3, ACSL4, ACTB, ADD1, ADD3, AHSG, AKR1B10, AKR1C1, AKT1, ALKBH5, ALMS1, ANK2, ANXA4, AP1G1, AP1S2, APOA2, APOC1, APOC3, APOF, APOM, APP, APRT, ARF1, ARFRP1, ARIH2, ARL4D, ARMC1, ARPC3, ARRB1, ASGR1, ATG9A, ATP1A1, ATP5G2, ATP5I, ATP6V0E1, ATP8B2, ATPIF1, AURKAIP1, AXIN1, AZGP1, AZIN1, B2M, BARD1, BCL2L1, BLOC1S6, BMP4, BNIP3, BRAF, BRCA1,…
GO:0033365	protein localization to organelle	GO_BiologicalProcess-GOA_09.02.2016_16h18	4e-08	1.5e-06	[5]	11.828	110	[AKR1B10, AKT1, ANK2, ARFRP1, ARIH2, ARL4D, ATG9A, ATPIF1, AURKAIP1, AXIN1, BAG1, BMP4, BRCA1, C8orf4, CCT2, CDK1, CDKN1A, CEP57, CHCHD2, CHMP4B, CRY2, CSE1L, CTDNEP1, CTSK, CYLD, DAB2IP, DDX58, DKC1, E2F1, ECT2, EIF2AK3, ESCO2, EZR, GBF1, GNPTAB, GOLPH3, GPAA1, HHEX, HSPA4, HSPH1, HUWE1, JAK2, KPNA1, LAMP1, LITAF, LRRK2, MBD4, MBTPS1, MED1, NCKIPSD, NFKBIB, NFKBIE, NOL3, NRP1, NUP107, NUP155, NU…
GO:0044403	symbiosis, encompassing mutualism through parasitism	GO_BiologicalProcess-GOA_09.02.2016_16h18	6.3e-08	2.4e-06	[3]	11.8913	105	[AKR1C1, AP1G1, AP1S2, APOA2, APOBEC3C, ARF1, ATF7, B2M, BCL2L1, BNIP3, CBX5, CCNA2, CDHR3, CDK13, CHMP4B, CREBBP, CRTC2, CUL7, DDB1, DDX3X, DDX5, DDX58, DLG1, EIF4E, EIF4G1, EIF4H, EP300, ERCC2, FDPS, GBF1, GFI1, GTF2E2, GTF2H3, HAVCR1, HCFC1, HLA-A, HNRNPK, HPN, HS3ST5, ITGAV, KARS, KDM4A, KPNA1, LAMP1, LYN, MVB12B, NEDD4L, NUP107, NUP155, NUP210, NUP37, NUP58, NXF1, OAS1, P4HB, PABPC1, PSMA3, …
GO:0000184	nuclear-transcribed mRNA catabolic process, nonsense-mediated decay	GO_BiologicalProcess-GOA_09.02.2016_16h18	6.7e-08	2.5e-06	[8, 9, 10]	21.7054	28	[CASC3, CTIF, EIF4G1, GSPT1, PABPC1, PPP2R1A, RPL10, RPL13, RPL15, RPL18, RPL23A, RPL31, RPL34, RPL37A, RPL5, RPL7, RPS10, RPS11, RPS12, RPS15, RPS16, RPS21, RPS5, RPS8, SMG9, UHMK1, UPF2, UPF3A]
GO:1901566	organonitrogen compound biosynthetic process	GO_BiologicalProcess-GOA_09.02.2016_16h18	7.8e-08	2.9e-06	[4]	10.5788	159	[ABAT, ABCA1, ABCF1, ACADM, ACSL3, ADI1, ADNP, ADSL, AK1, AKT1, ALDH3B1, ALDH7A1, APOA2, APP, APRT, ATN1, ATP5G2, ATP5I, ATPIF1, AURKAIP1, AZIN1, B4GALT2, BUD31, CASC3, CERS2, CHDH, CHPF, CMPK1, CNOT3, CNOT6L, CPS1, CSAD, CSNK1G2, CTIF, CYP21A2, DARS, DCK, DDC, DDX3X, DHODH, DTD1, DUT, EDN1, EEF1G, EIF1, EIF1AX, EIF1B, EIF2AK3, EIF2B2, EIF2B3, EIF2B4, EIF3B, EIF4B, EIF4E, EIF4G1, EIF4G2, EIF4H, E…
GO:0044255	cellular lipid metabolic process	GO_BiologicalProcess-GOA_09.02.2016_16h18	8.8e-08	3.3e-06	[3, 4]	11.21	126	[ABCA1, ACAD9, ACADM, ACADS, ACLY, ACOT11, ACSL1, ACSL3, ACSL4, ACSS1, ADH4, ADH5, AGPAT1, AKR1B10, AKR1C1, AKR1C2, AKT1, ALDH3B1, ALG11, APOA2, APOC1, APOC3, APOM, ARF1, ARSG, ARSI, BRCA1, C3, CERS2, CLSTN1, CPS1, CREBBP, CRLS1, CSNK1G2, CTDNEP1, CYGB, CYP21A2, CYP4F12, CYP4F2, DAB2IP, DECR1, E2F1, ECH1, ECHDC2, EDN1, EIF2AK3, ELOVL6, ENPP7, ERLIN1, FAR1, FDPS, FHL2, G6PC, GGT1, GPAA1, GPC3, GPD…
GO:1902580	single-organism cellular localization	GO_BiologicalProcess-GOA_09.02.2016_16h18	9.6e-08	3.5e-06	[3]	10.7887	145	[ACSL3, AKT1, ANK2, AP1S2, ARF1, ARFRP1, ARIH2, ARL4D, ATPIF1, AURKAIP1, AXIN1, BCL2L1, BLOC1S6, BMP4, BRAF, BRCA1, C8orf4, CDK1, CDKN1A, CEP57, CHCHD2, CHMP4B, CLSTN1, CNIH1, COPZ1, CRY2, CSE1L, CTSK, CYLD, DAB2IP, DDX58, DLG1, DMTN, DNAJA3, DPYSL2, DYNC1H1, E2F1, ECT2, EIF6, EMP2, EZR, F5, GBF1, GNPTAB, GOLPH3, HIF1A, HSPA4, HUWE1, IKBKB, JAK2, KIF3A, KIF3C, KPNA1, LAMP1, LIN7C, LITAF, LRP4, LR…
GO:0044802	single-organism membrane organization	GO_BiologicalProcess-GOA_09.02.2016_16h18	9.7e-08	3.5e-06	[3, 4]	11.5987	111	[ABCA1, ACSL3, AKT1, ANK2, ARF1, ARFRP1, ARL4D, ATG9A, ATP8B2, ATPIF1, BCL2L1, BNIP3, BRAF, CDK1, CHCHD6, CHMP4B, CNIH1, COPZ1, CTDNEP1, DLG1, DMTN, DNAJA3, E2F1, EMP2, EZR, F5, FAT4, GBF1, GDNF, GNAI3, GOLPH3, HSPA4, IKBKB, LIN7C, LRP4, LYPLA1, LYPLAL1, MIEF1, MPP2, MTSS1, MTSS1L, MYH10, MYO18A, NDEL1, NEK6, NOL3, NUMB, NUP107, NUP155, NUP210, NUP37, NUP58, OXA1L, PLSCR4, PPP2R1A, PPP6R3, PPT1, …
GO:0018130	heterocycle biosynthetic process	GO_BiologicalProcess-GOA_09.02.2016_16h18	1e-07	3.6e-06	[4]	8.8091	395	[ABCA1, ABL1, ADGRG3, ADNP, ADSL, AFF1, AFF4, AK1, AKT1, ALPK3, ANKRD52, ANXA4, APP, APRT, ARGLU1, ARHGAP35, ARHGEF11, ARID1B, ARNTL2, ARRB1, ASF1B, ASXL1, ASXL2, ATAD2, ATF7, ATN1, ATP5G2, ATP5I, ATPIF1, AURKAIP1, AXIN1, BACH1, BAG1, BAZ1A, BAZ1B, BMP4, BPTF, BRCA1, BRD2, BRIP1, BRMS1L, BUD31, C3orf33, C8orf4, CA9, CASK, CBL, CBX5, CC2D1A, CCNA2, CCND1, CCT2, CD40, CDCA7, CDCA7L, CDK1, CDK12, CD…
GO:0031324	negative regulation of cellular metabolic process	GO_BiologicalProcess-GOA_09.02.2016_16h18	1.1e-07	4.1e-06	[3, 4, 5]	9.61539	240	[ABL1, ACIN1, ADGRG3, AHSG, AKT1, AKT1S1, ANAPC10, ANKRD52, ANXA4, APOC1, APOC3, APOM, APP, ARHGAP35, ARRB1, ASXL1, ASXL2, ATAD2, ATF7, ATN1, ATP1A1, AXIN1, BACH1, BAG1, BARD1, BCL2L1, BMP4, BNIP3, BPTF, BRCA1, BRIP1, BRMS1L, BTN2A2, BUD31, C3, C3orf33, CAMK2N1, CBX5, CC2D1A, CCND1, CDKN1A, CEBPG, CEP192, CHD4, CHD8, CHMP4B, CNOT3, CNOT6L, COPS2, COQ7, CREBBP, CRY2, CYLD, DAB2IP, DAP, DDIT4, DDX3…
GO:0045184	establishment of protein localization	GO_BiologicalProcess-GOA_09.02.2016_16h18	1.3e-07	4.8e-06	[3, 4]	9.87654	208	[ABAT, ABCA1, ABL1, ACSL3, AKT1, ANK2, ANXA4, AP1G1, AP1S2, APOA2, APOC3, ARF1, ARFRP1, ARIH2, ARL4D, ARRB1, ATG9A, ATP6V0E1, ATPIF1, AURKAIP1, AXIN1, AZGP1, BARD1, BCL2L1, BLOC1S6, BMP4, BRAF, BRCA1, BTN2A2, C8orf4, CACNA1D, CCT2, CD40, CDK1, CDKN1A, CEP290, CEP57, CHCHD2, CHMP4B, COG2, COPZ1, CRY2, CSE1L, CTSK, CYLD, DAB2IP, DDX58, DKC1, DLG1, DMTN, DOPEY2, E2F1, ECT2, EIF2AK3, EIF5A, EXOC8, EZ…
GO:0000956	nuclear-transcribed mRNA catabolic process	GO_BiologicalProcess-GOA_09.02.2016_16h18	1.4e-07	4.9e-06	[7, 8, 9]	17.7885	37	[CASC3, CNOT3, CNOT6L, CTIF, EIF4B, EIF4E, EIF4G1, EXOSC7, GSPT1, LSM1, LSM5, MLH1, PABPC1, PPP2R1A, RPL10, RPL13, RPL15, RPL18, RPL23A, RPL31, RPL34, RPL37A, RPL5, RPL7, RPS10, RPS11, RPS12, RPS15, RPS16, RPS21, RPS5, RPS8, SMG9, TNRC6B, UHMK1, UPF2, UPF3A]
GO:0051649	establishment of localization in cell	GO_BiologicalProcess-GOA_09.02.2016_16h18	1.4e-07	5e-06	[3]	9.43601	261	[ABAT, ABCA1, ABL1, ACSL3, AKR1B10, AKT1, ALKBH5, ALMS1, ANK2, ANXA4, AP1G1, AP1S2, APOA2, APP, ARF1, ARFRP1, ARIH2, ARL4D, ARRB1, ATP5G2, ATP5I, ATPIF1, AURKAIP1, AXIN1, BARD1, BCL2L1, BLOC1S6, BMP4, BNIP3, BRAF, BRCA1, BTN2A2, C8orf4, CACNA1D, CASK, CD40, CDC42BPA, CDK1, CDKN1A, CEP290, CEP57, CHCHD2, CHMP4B, CLSTN1, CNIH1, COG2, COPZ1, CPSF1, CRY2, CSE1L, CTSK, CYLD, DAB2IP, DCTN6, DDC, DDX58,…
GO:0001887	selenium compound metabolic process	GO_BiologicalProcess-GOA_09.02.2016_16h18	1.5e-07	5e-06	[3]	21.4286	27	[DARS, EPRS, GNMT, IARS, KARS, MAT1A, PAPSS2, RPL10, RPL13, RPL15, RPL18, RPL23A, RPL31, RPL34, RPL37A, RPL5, RPL7, RPS10, RPS11, RPS12, RPS15, RPS16, RPS21, RPS5, RPS8, SEPHS2, SEPP1]
GO:0048522	positive regulation of cellular process	GO_BiologicalProcess-GOA_09.02.2016_16h18	1.5e-07	5e-06	[2, 3, 4]	8.66492	429	[ABAT, ABCA1, ABCF1, ABL1, ACIN1, ACLY, ACSL1, ACSL3, ACSL4, ADAMTSL4, ADNP, AFF1, AGPAT1, AHSG, AKR1C2, AKT1, ANAPC10, ANK2, AP1G1, APH1A, APOA2, APOC1, APOC3, APP, ARAP1, ARF1, ARHGAP35, ARHGEF11, ARID1B, ARIH2, ARNTL2, ARPC3, ARRB1, ARRDC3, ASXL1, ASXL2, ATAD2, ATAT1, ATPIF1, AURKAIP1, AXIN1, AZIN1, B2M, BACH1, BAG1, BARD1, BAZ1B, BCL2L1, BLOC1S6, BMP4, BNIP2, BNIP3, BPTF, BRAF, BRCA1, BRIP1, …
GO:0034654	nucleobase-containing compound biosynthetic process	GO_BiologicalProcess-GOA_09.02.2016_16h18	1.6e-07	5.2e-06	[4, 5]	8.80018	388	[ABCA1, ABL1, ADGRG3, ADNP, ADSL, AFF1, AFF4, AK1, AKT1, ALPK3, ANKRD52, ANXA4, APP, APRT, ARGLU1, ARHGAP35, ARHGEF11, ARID1B, ARNTL2, ARRB1, ASF1B, ASXL1, ASXL2, ATAD2, ATF7, ATN1, ATP5G2, ATP5I, AURKAIP1, AXIN1, BACH1, BAG1, BAZ1A, BAZ1B, BMP4, BPTF, BRCA1, BRD2, BRIP1, BRMS1L, BUD31, C3orf33, C8orf4, CA9, CASK, CBL, CBX5, CC2D1A, CCNA2, CCND1, CCT2, CD40, CDCA7, CDCA7L, CDK1, CDK12, CDK13, CDK…
GO:0006413	translational initiation	GO_BiologicalProcess-GOA_09.02.2016_16h18	1.7e-07	5.5e-06	[3, 6, 7, 8]	16.0142	45	[ABCF1, AURKAIP1, CTIF, DDX3X, EIF1, EIF1AX, EIF1B, EIF2AK3, EIF2B2, EIF2B3, EIF2B4, EIF3B, EIF4B, EIF4E, EIF4G1, EIF4G2, EIF4H, EIF6, MRPL42, MRPL52, MRPS26, MRPS36, PABPC1, PPP1R15A, RPL10, RPL13, RPL15, RPL18, RPL23A, RPL31, RPL34, RPL37A, RPL5, RPL7, RPS10, RPS11, RPS12, RPS15, RPS16, RPS21, RPS5, RPS6KB1, RPS8, UHMK1, YTHDF2]
GO:0010033	response to organic substance	GO_BiologicalProcess-GOA_09.02.2016_16h18	1.7e-07	5.5e-06	[3]	9.23223	291	[ABAT, ABCA1, ABCA3, ABL1, ACADM, ACADS, ACSL1, ACSL3, ACSL4, ADD1, ADH5, ADNP, AGPAT1, AHSG, AKR1C1, AKR1C2, AKT1, AKT1S1, ANK2, ANXA7, APH1A, APOA2, APOC3, APOM, APP, APRT, ARHGEF11, ARRB1, ASXL1, ATAT1, ATP1A1, ATP6V0E1, AXIN1, B2M, BCL2L1, BFAR, BMP4, BPTF, BRAF, BRCA1, BUD31, C12orf76, C3, CA9, CAB39, CASK, CBL, CCDC47, CCL16, CCNA2, CCND1, CD40, CDH5, CDK1, CDKN1A, CEP57, CHRNA2, CLSTN1, CO…
GO:0006396	RNA processing	GO_BiologicalProcess-GOA_09.02.2016_16h18	2.2e-07	6.8e-06	[5, 6, 7]	11.7647	100	[A1CF, ACIN1, ALKBH5, APP, BARD1, BUD31, CASC3, CDK12, CDK13, CELF5, CNOT6L, COQ7, CPSF1, CPSF6, CPSF7, DAZAP1, DDX5, DHX33, DHX35, DHX38, DHX40, DKC1, DNAJC8, EMG1, EPRS, ERCC2, ESRP2, EXOSC7, FTSJ3, GTF2H3, HEATR1, HNRNPH1, HNRNPK, INTS2, IWS1, KARS, LSM1, LSM5, LUC7L3, MBNL1, MCM2, NOL3, NSUN4, NUDT21, NUP107, NUP155, NUP210, NUP37, NUP58, PABPC1, PIWIL2, PPIL3, PPP2R1A, PRMT7, PSPC1, PTBP1, P…
GO:0006629	lipid metabolic process	GO_BiologicalProcess-GOA_09.02.2016_16h18	2.3e-07	7.1e-06	[3]	10.53	151	[ABCA1, ACAD9, ACADM, ACADS, ACAT2, ACLY, ACOT11, ACSL1, ACSL3, ACSL4, ACSS1, ADH4, ADH5, AGPAT1, AKR1B10, AKR1C1, AKR1C2, AKR1D1, AKT1, ALDH3B1, ALG11, APOA2, APOC1, APOC3, APOF, APOM, APP, ARF1, ARSG, ARSI, ATP1A1, BRCA1, C3, CERS2, CLSTN1, CPS1, CREBBP, CRLS1, CSNK1G2, CTDNEP1, CYGB, CYP19A1, CYP21A2, CYP4F12, CYP4F2, DAB2IP, DECR1, E2F1, ECH1, ECHDC2, EDN1, EIF2AK3, ELOVL6, ENPP7, ERLIN1, FAR…
GO:0043604	amide biosynthetic process	GO_BiologicalProcess-GOA_09.02.2016_16h18	2.7e-07	8.4e-06	[5]	11.8519	96	[ABCF1, ADSL, AKT1, APP, ATN1, ATPIF1, AURKAIP1, CASC3, CERS2, CNOT3, CNOT6L, CPS1, CTIF, CYP21A2, DARS, DDX3X, DTD1, EEF1G, EIF1, EIF1AX, EIF1B, EIF2AK3, EIF2B2, EIF2B3, EIF2B4, EIF3B, EIF4B, EIF4E, EIF4G1, EIF4G2, EIF4H, EIF5A, EIF6, EPRS, GDF15, GGT1, GIGYF2, GSPT1, GTF2H3, IARS, IARS2, KARS, MGST2, MRPL42, MRPL52, MRPS26, MRPS36, MTHFD1, NFE2L2, NSUN4, PABPC1, PIWIL2, POU5F1, PPP1R15A, PTAFR,…
GO:0051171	regulation of nitrogen compound metabolic process	GO_BiologicalProcess-GOA_09.02.2016_16h18	2.9e-07	8.7e-06	[3, 4]	8.75451	388	[ABAT, ABCA1, ABCF1, ABL1, ACIN1, ACSL3, ADGRG3, ADNP, AFF1, AFF4, AKT1, ALPK3, ANKRD52, ANXA4, APOC1, APOC3, APP, ARGLU1, ARHGAP35, ARHGEF11, ARID1B, ARNTL2, ARRB1, ASF1B, ASXL1, ASXL2, ATAD2, ATF7, ATN1, ATPIF1, AURKAIP1, AXIN1, AZIN1, BACH1, BAG1, BARD1, BAZ1A, BAZ1B, BMP4, BPGM, BPTF, BRCA1, BRD2, BRIP1, BRMS1L, BUD31, C3orf33, C8orf4, CA9, CASC3, CASK, CBL, CBX5, CC2D1A, CCNA2, CCND1, CCT2, …
GO:0006793	phosphorus metabolic process	GO_BiologicalProcess-GOA_09.02.2016_16h18	3.1e-07	9e-06	[3]	9.12686	300	[ABCA1, ABL1, ACLY, ACOT11, ACP1, ACSL1, ACSL3, ACSL4, ACSS1, ADNP, ADSL, AGPAT1, AHSG, AK1, AKAP8L, AKT1, AKT1S1, ALPK3, APOA2, APOC1, APOC3, APP, APRT, ARF1, ARRB1, ATP1A1, ATP5G2, ATP5I, ATPIF1, AURKAIP1, AXIN1, BAG1, BARD1, BAZ1B, BMP2K, BMP4, BNIP2, BPGM, BRAF, BUD31, C3, C3orf33, CAB39, CAMK2N1, CASK, CCDC6, CCL16, CCNA2, CCND1, CD40, CDC25A, CDC42BPA, CDK1, CDK12, CDK13, CDKN1A, CEP192, CE…
GO:0006366	transcription from RNA polymerase II promoter	GO_BiologicalProcess-GOA_09.02.2016_16h18	3e-07	9e-06	[6, 7, 8, 9, 10]	9.77444	208	[ABL1, AFF4, AKT1, ANKRD52, ANXA4, APP, ARHGAP35, ARNTL2, ARRB1, ASXL1, ASXL2, ATAD2, ATF7, ATN1, AXIN1, BACH1, BAG1, BMP4, BPTF, BRCA1, BRD2, BRIP1, BRMS1L, BUD31, CA9, CASK, CC2D1A, CCND1, CD40, CDK1, CDK12, CDK13, CDT1, CEBPG, CHCHD2, CHD4, CHD8, COPS2, COQ7, COX5A, COX7A2L, COX7C, CPSF1, CPSF7, CREB3L3, CREBBP, CRTC2, CRY2, DAB2IP, DDIT4, DDX3X, DDX5, DDX58, DHX38, DKK1, DLG1, DNAJA3, E2F1, E…
GO:0010605	negative regulation of macromolecule metabolic process	GO_BiologicalProcess-GOA_09.02.2016_16h18	3.2e-07	9.4e-06	[3, 4, 5]	9.50298	239	[ABL1, ACIN1, ADGRG3, ADNP, AHSG, AKT1, AKT1S1, ANAPC10, ANKRD52, ANXA4, ANXA7, APOM, APP, ARHGAP35, ARRB1, ASXL1, ASXL2, ATAD2, ATF7, ATN1, AXIN1, AZIN1, BACH1, BAG1, BARD1, BMP4, BPTF, BRCA1, BRIP1, BRMS1L, C3, C3orf33, CAMK2N1, CBX5, CC2D1A, CCND1, CDKN1A, CEBPG, CEP192, CHD4, CHD8, CNOT3, CNOT6L, COPS2, COQ7, CREBBP, CRY2, CYGB, CYLD, DAB2IP, DAP, DDIT4, DDX3X, DDX5, DEPDC1, DKK1, DLG1, DMTN,…
GO:0019438	aromatic compound biosynthetic process	GO_BiologicalProcess-GOA_09.02.2016_16h18	3.3e-07	9.4e-06	[4]	8.73051	392	[ABCA1, ABL1, ADGRG3, ADNP, ADSL, AFF1, AFF4, AK1, AKT1, ALPK3, ANKRD52, ANXA4, APP, APRT, ARGLU1, ARHGAP35, ARHGEF11, ARID1B, ARNTL2, ARRB1, ASF1B, ASXL1, ASXL2, ATAD2, ATF7, ATN1, ATP5G2, ATP5I, ATPIF1, AURKAIP1, AXIN1, BACH1, BAG1, BAZ1A, BAZ1B, BMP4, BPTF, BRCA1, BRD2, BRIP1, BRMS1L, BUD31, C3orf33, C8orf4, CA9, CASK, CBL, CBX5, CC2D1A, CCNA2, CCND1, CCT2, CD40, CDCA7, CDCA7L, CDK1, CDK12, CD…
GO:0022607	cellular component assembly	GO_BiologicalProcess-GOA_09.02.2016_16h18	3.4e-07	9.8e-06	[3]	9.45216	245	[ABCA1, ABL1, ACAD9, ACADM, ACADS, ACSL3, ACTB, ADD1, ADNP, ADSL, AKR1C1, ALMS1, ANK2, ANLN, APOA2, APOC1, APOC3, APOM, APP, ARAP1, ARF1, ARL4D, ARPC3, ARRB1, ASF1B, ATAT1, ATG2B, ATG9A, ATPAF1, ATPIF1, AXIN1, BRAF, BRCA1, BRD2, BUD31, C1QTNF6, CAB39, CAPZB, CCNB1IP1, CCT2, CD40, CDC42EP1, CDH5, CDK1, CEP192, CEP290, CEP57, CFL2, CHD4, CHMP4B, CHRNA2, CLDN19, CLSTN1, CLSTN3, CNIH1, CNOT6L, COA6, …
GO:0006790	sulfur compound metabolic process	GO_BiologicalProcess-GOA_09.02.2016_16h18	3.6e-07	1e-05	[3]	14.0097	58	[ACLY, ACOT11, ACSL1, ACSL3, ACSL4, ACSS1, ADI1, ARSG, B4GALT2, CHPF, CLIC4, CPS1, CSAD, CYP21A2, DLST, EEF1G, EIF2B2, EIF2B4, ELOVL6, ENOPH1, ESD, FAR1, GGT1, GLCE, GLO1, GNMT, GOT1, GPC3, GSTA1, GSTM4, GSTO1, GSTZ1, GXYLT1, HS3ST3B1, HS3ST5, IMPAD1, MAT1A, MGST2, MPST, MTHFD1, MTR, MVD, MVK, NFE2L2, OGDH, PAPSS2, PDHB, PDK1, PIPOX, PPT1, SDC1, SLC19A2, SLC25A1, SOD2, ST3GAL4, SUCLG2, SULT2A1, T…
GO:0032446	protein modification by small protein conjugation	GO_BiologicalProcess-GOA_09.02.2016_16h18	3.9e-07	1e-05	[7, 8]	11.4629	105	[ABL1, AKT1, ANAPC10, ARIH2, ARRB1, ARRDC3, ASB2, AXIN1, BACH1, BARD1, BFAR, BLMH, BRCA1, BRIP1, CBL, CCNB1IP1, CDK1, CUL7, DCAF5, DCAF7, DCUN1D2, DDB1, DDRGK1, DNAJA3, DNAJB2, DTL, DUSP1, EGR1, FANCI, GAN, HECTD4, HNRNPK, HUWE1, KLHL29, KLHL42, LRRK2, LTN1, MBD4, MDC1, MED1, MED11, MED17, MIA3, MIB2, MYCBP2, NEDD4L, NFE2L2, NUP107, NUP155, NUP210, NUP37, NUP58, PAXIP1, PIAS4, PSEN1, PSMA3, PSMA5…
GO:1901605	alpha-amino acid metabolic process	GO_BiologicalProcess-GOA_09.02.2016_16h18	4.2e-07	1.1e-05	[4, 5, 7, 8]	14.2487	55	[ADI1, ADSL, ALDH7A1, ATAT1, ATPIF1, AZIN1, CPS1, CYP21A2, DDAH1, DLST, DMGDH, DTD1, EIF2B2, EIF2B4, ENOPH1, ERO1A, GATM, GCAT, GGT1, GNMT, GOT1, GSTZ1, IVD, MPST, MTHFD1, MTR, NIT2, OGDH, P4HB, PFAS, PIPOX, PRODH2, PSAT1, RPL10, RPL13, RPL15, RPL18, RPL23A, RPL31, RPL34, RPL37A, RPL5, RPL7, RPS10, RPS11, RPS12, RPS15, RPS16, RPS21, RPS5, RPS8, SEPHS2, SERINC3, SLC6A4, TINAGL1]
GO:0006575	cellular modified amino acid metabolic process	GO_BiologicalProcess-GOA_09.02.2016_16h18	4.6e-07	1.2e-05	[3, 4]	14.6552	51	[ALDH7A1, ATPIF1, CHDH, CLIC4, CPS1, CYP21A2, DDAH1, DIDO1, EEF1G, ERO1A, GATM, GGT1, GLO1, GNMT, GSTA1, GSTM4, GSTO1, GSTZ1, HPN, MAT1A, MBD4, MED1, MGST2, MPST, MTHFD1, NFE2L2, P4HB, PANK1, PIPOX, RPL10, RPL13, RPL15, RPL18, RPL23A, RPL31, RPL34, RPL37A, RPL5, RPL7, RPS10, RPS11, RPS12, RPS15, RPS16, RPS21, RPS5, RPS8, SEPHS2, SERINC3, SLC6A4, SOD2]
GO:0031323	regulation of cellular metabolic process	GO_BiologicalProcess-GOA_09.02.2016_16h18	4.7e-07	1.2e-05	[3, 4]	8.37446	509	[ABAT, ABCA1, ABCF1, ABL1, ACADM, ACIN1, ACLY, ACSL1, ACSL3, ADGRG3, ADNP, AFF1, AFF4, AGPAT1, AHSG, AKT1, AKT1S1, ALPK3, ANAPC10, ANKRD52, ANXA4, APOA2, APOC1, APOC3, APOM, APP, ARAP1, ARF1, ARGLU1, ARHGAP35, ARHGEF11, ARID1B, ARIH2, ARNTL2, ARRB1, ARRDC3, ASF1B, ASXL1, ASXL2, ATAD2, ATF7, ATN1, ATP1A1, ATPIF1, AURKAIP1, AXIN1, AZIN1, BACH1, BAG1, BARD1, BAZ1A, BAZ1B, BCL2L1, BMP4, BNIP2, BNIP3,…
GO:0015031	protein transport	GO_BiologicalProcess-GOA_09.02.2016_16h18	6.4e-07	1.6e-05	[4, 5]	9.83103	192	[ABAT, ABCA1, ABL1, ACSL3, AKT1, ANK2, ANXA4, AP1G1, AP1S2, APOA2, APOC3, ARF1, ARFRP1, ARIH2, ARL4D, ARRB1, ATG9A, ATP6V0E1, ATPIF1, AURKAIP1, AXIN1, AZGP1, BARD1, BLOC1S6, BMP4, BRCA1, BTN2A2, C8orf4, CACNA1D, CD40, CDK1, CDKN1A, CEP290, CEP57, CHCHD2, CHMP4B, COG2, COPZ1, CRY2, CSE1L, CTSK, CYLD, DAB2IP, DDX58, DMTN, DOPEY2, ECT2, EIF2AK3, EIF5A, EXOC8, EZR, FAM160A2, FAM21C, FOXA2, FRAS1, GBF…
GO:0019222	regulation of metabolic process	GO_BiologicalProcess-GOA_09.02.2016_16h18	6.5e-07	1.7e-05	[2, 3]	8.22392	570	[A1CF, ABAT, ABCA1, ABCF1, ABL1, ACADM, ACIN1, ACLY, ACSL1, ACSL3, ACTA2, ACTB, ADGRG3, ADNP, AFF1, AFF4, AGPAT1, AHSG, AKR1B10, AKR1C1, AKT1, AKT1S1, ALPK3, ANAPC10, ANK2, ANKRD52, ANXA4, ANXA7, APH1A, APOA2, APOC1, APOC3, APOM, APP, ARAP1, ARF1, ARGLU1, ARHGAP11A, ARHGAP35, ARHGEF11, ARHGEF28, ARID1B, ARIH2, ARNTL2, ARRB1, ARRDC3, ASF1B, ASXL1, ASXL2, ATAD2, ATF7, ATN1, ATP1A1, ATPIF1, AURKAIP1…
GO:0043043	peptide biosynthetic process	GO_BiologicalProcess-GOA_09.02.2016_16h18	6.7e-07	1.7e-05	[5, 6]	11.967	87	[ABCF1, AKT1, APP, ATN1, AURKAIP1, CASC3, CNOT3, CNOT6L, CTIF, DARS, DDX3X, DTD1, EEF1G, EIF1, EIF1AX, EIF1B, EIF2AK3, EIF2B2, EIF2B3, EIF2B4, EIF3B, EIF4B, EIF4E, EIF4G1, EIF4G2, EIF4H, EIF5A, EIF6, EPRS, GDF15, GGT1, GIGYF2, GSPT1, GTF2H3, IARS, IARS2, KARS, MGST2, MRPL42, MRPL52, MRPS26, MRPS36, NFE2L2, NSUN4, PABPC1, PIWIL2, POU5F1, PPP1R15A, PTAFR, RACK1, RAN, RPL10, RPL13, RPL15, RPL18, RPL…
GO:0048518	positive regulation of biological process	GO_BiologicalProcess-GOA_09.02.2016_16h18	7.4e-07	1.8e-05	[1, 2, 3]	8.4057	484	[ABAT, ABCA1, ABCB1, ABCF1, ABL1, ACIN1, ACLY, ACSL1, ACSL3, ACSL4, ACTA2, ACTB, ADAMTSL4, ADNP, AFF1, AGPAT1, AHSG, AKR1B10, AKR1C1, AKR1C2, AKT1, ANAPC10, ANK2, AP1G1, APH1A, APOA2, APOC1, APOC3, APP, ARAP1, ARF1, ARHGAP11A, ARHGAP35, ARHGEF11, ARHGEF28, ARID1B, ARIH2, ARNTL2, ARPC3, ARRB1, ARRDC3, ASXL1, ASXL2, ATAD2, ATAT1, ATP1A1, ATPIF1, AURKAIP1, AXIN1, AZIN1, B2M, BACH1, BAG1, BARD1, BAZ1…
GO:0006397	mRNA processing	GO_BiologicalProcess-GOA_09.02.2016_16h18	7.7e-07	1.9e-05	[6, 7, 8]	13.3621	62	[A1CF, ACIN1, ALKBH5, APP, BARD1, BUD31, CASC3, CDK12, CDK13, CELF5, CNOT6L, CPSF1, CPSF6, CPSF7, DAZAP1, DDX5, DHX35, DHX38, DNAJC8, ERCC2, ESRP2, GTF2H3, HNRNPH1, HNRNPK, IWS1, LSM1, LSM5, LUC7L3, MBNL1, NOL3, NUDT21, PABPC1, PPIL3, PRMT7, PSPC1, PTBP1, RBM10, RBM15, RBM23, RBM25, SAFB, SCAF1, SF3B3, SFPQ, SFSWAP, SNRPB, SON, SRRM2, SRSF3, SRSF4, SRSF7, SSU72, SUPT6H, SYF2, TFIP11, THOC1, TNRC6…
GO:0032787	monocarboxylic acid metabolic process	GO_BiologicalProcess-GOA_09.02.2016_16h18	7.5e-07	1.9e-05	[6, 7]	12.2511	80	[ABAT, ACAD9, ACADM, ACADS, ACLY, ACOT11, ACSL1, ACSL3, ACSL4, ACSS1, AKR1C1, AKR1C2, AKR1D1, AKT1, APOC1, APOC3, BPGM, BRCA1, C3, CYGB, CYP4F12, CYP4F2, DDIT4, DECR1, DHTKD1, DLST, ECD, ECH1, ECHDC2, EDN1, EIF2AK3, ELOVL6, ENO1, ERLIN1, ERO1A, GGT1, GLO1, GRHPR, HACL1, HADH, HADHB, HIF1A, HSD17B8, IVD, LYPLA1, MGST2, MIA3, MIF, MORC2, MSMO1, MYCBP2, NCOA1, NDUFAB1, NUCB2, OGDH, P4HB, PANK1, PDHB…
GO:0015931	nucleobase-containing compound transport	GO_BiologicalProcess-GOA_09.02.2016_16h18	7.7e-07	1.9e-05	[5]	17.1569	35	[ALKBH5, CASC3, CPSF1, DHX38, EIF4E, EIF5A, GJB1, HHEX, IWS1, NPIPA1, NUP107, NUP155, NUP210, NUP37, NUP58, NXF1, RAN, RIPK1, SENP2, SLC25A36, SLC29A1, SLC29A3, SLC35A3, SLC35B4, SLC6A4, SRSF3, SRSF4, SRSF7, SUPT6H, THOC1, TOMM20, TSC1, UPF2, UPF3A, XPO7]
GO:0032774	RNA biosynthetic process	GO_BiologicalProcess-GOA_09.02.2016_16h18	8.5e-07	2.1e-05	[5, 6, 7]	8.80725	350	[ABL1, ADGRG3, ADNP, AFF1, AFF4, AKT1, ALPK3, ANKRD52, ANXA4, APP, ARGLU1, ARHGAP35, ARHGEF11, ARID1B, ARNTL2, ARRB1, ASF1B, ASXL1, ASXL2, ATAD2, ATF7, ATN1, AURKAIP1, AXIN1, BACH1, BAG1, BAZ1A, BAZ1B, BMP4, BPTF, BRCA1, BRD2, BRIP1, BRMS1L, BUD31, C3orf33, C8orf4, CA9, CASK, CBL, CBX5, CC2D1A, CCNA2, CCND1, CD40, CDCA7, CDCA7L, CDK1, CDK12, CDK13, CDT1, CEBPG, CEP290, CHCHD2, CHD4, CHD8, CNOT3, …
GO:0006412	translation	GO_BiologicalProcess-GOA_09.02.2016_16h18	9.4e-07	2.2e-05	[5, 6, 7]	12	84	[ABCF1, AKT1, APP, ATN1, AURKAIP1, CASC3, CNOT3, CNOT6L, CTIF, DARS, DDX3X, DTD1, EEF1G, EIF1, EIF1AX, EIF1B, EIF2AK3, EIF2B2, EIF2B3, EIF2B4, EIF3B, EIF4B, EIF4E, EIF4G1, EIF4G2, EIF4H, EIF5A, EIF6, EPRS, GDF15, GIGYF2, GSPT1, GTF2H3, IARS, IARS2, KARS, MRPL42, MRPL52, MRPS26, MRPS36, NSUN4, PABPC1, PIWIL2, POU5F1, PPP1R15A, PTAFR, RACK1, RAN, RPL10, RPL13, RPL15, RPL18, RPL23A, RPL31, RPL34, RP…
GO:0044770	cell cycle phase transition	GO_BiologicalProcess-GOA_09.02.2016_16h18	9.4e-07	2.3e-05	[4, 5]	12.8544	68	[ABCB1, AKT1, ALMS1, ANAPC10, ANLN, APP, BACH1, BRIP1, C8orf4, CCNA2, CCND1, CDC25A, CDK1, CDKN1A, CDT1, CEP192, CEP290, CEP57, CREBBP, DDB1, DDX3X, DUSP1, DYNC1H1, E2F1, ECD, EIF4E, EP300, ERCC2, FANCI, FOXO4, GFI1, GIGYF2, GSPT1, LIN54, MCM10, MCM2, MCM7, NEK6, NUMA1, PLCB1, PPP2R1A, PPP3CA, PRIM1, PRIM2, PSMA3, PSMA5, PSMA7, PSMB4, PSMC5, PSME3, PSMG2, RAB11A, RAB8A, RAD51B, RDX, RPS6KB1, RRM2…
GO:0006402	mRNA catabolic process	GO_BiologicalProcess-GOA_09.02.2016_16h18	1.2e-06	2.8e-05	[6, 7, 8]	16.3717	37	[CASC3, CNOT3, CNOT6L, CTIF, EIF4B, EIF4E, EIF4G1, EXOSC7, GSPT1, LSM1, LSM5, MLH1, PABPC1, PPP2R1A, RPL10, RPL13, RPL15, RPL18, RPL23A, RPL31, RPL34, RPL37A, RPL5, RPL7, RPS10, RPS11, RPS12, RPS15, RPS16, RPS21, RPS5, RPS8, SMG9, TNRC6B, UHMK1, UPF2, UPF3A]
GO:0010468	regulation of gene expression	GO_BiologicalProcess-GOA_09.02.2016_16h18	1.1e-06	2.8e-05	[4, 5]	8.66697	381	[A1CF, ABCF1, ABL1, ACIN1, ACTA2, ACTB, ADGRG3, ADNP, AFF1, AFF4, AKR1C1, AKT1, ALPK3, ANK2, ANKRD52, ANXA4, ANXA7, APP, ARGLU1, ARHGAP35, ARHGEF11, ARID1B, ARNTL2, ARRB1, ASF1B, ASXL1, ASXL2, ATAD2, ATF7, ATN1, AXIN1, BACH1, BAG1, BARD1, BAZ1A, BAZ1B, BMP4, BPTF, BRAF, BRCA1, BRD2, BRIP1, BRMS1L, BUD31, C3, C3orf33, C8orf4, CA9, CASC3, CASK, CBL, CBX5, CC2D1A, CCNA2, CCND1, CD40, CDCA7, CDCA7L, …
GO:0010629	negative regulation of gene expression	GO_BiologicalProcess-GOA_09.02.2016_16h18	1.2e-06	2.8e-05	[4, 5, 6]	10.1004	161	[ACIN1, ADGRG3, ADNP, AKT1, ANKRD52, ANXA4, ANXA7, ARHGAP35, ARRB1, ASXL1, ASXL2, ATAD2, ATF7, ATN1, AXIN1, BACH1, BARD1, BMP4, BPTF, BRCA1, BRIP1, BRMS1L, CBX5, CC2D1A, CCND1, CDKN1A, CEBPG, CHD4, CHD8, CNOT3, CNOT6L, COPS2, COQ7, CREBBP, CRY2, CYLD, DAB2IP, DAP, DDX3X, DDX5, DEPDC1, DKK1, DLG1, DNAJA3, E2F1, EDN1, EFNA1, EGR1, EHMT1, EIF2AK3, EIF2B3, EIF2B4, EIF4E, ENO1, EP300, EPRS, ERCC2, EZR…
GO:1901700	response to oxygen-containing compound	GO_BiologicalProcess-GOA_09.02.2016_16h18	1.3e-06	3.1e-05	[3]	9.90379	175	[ABAT, ABCA1, ABL1, ACSL1, ADH5, ADNP, AHSG, AKR1C1, AKR1C2, AKT1, AKT1S1, APOA2, APOC3, APOM, APP, APRT, ARRB1, ASXL1, ATP1A1, ATP6V0E1, B2M, BCL2L1, BMP4, BNIP3, BRAF, BRCA1, BUD31, C12orf76, C3, CA9, CAB39, CCNA2, CCND1, CD40, CDK1, CDKN1A, COL4A6, CPS1, CRY2, CTSV, CXCL16, CYC1, CYP21A2, DAB2IP, DKK1, DLC1, DMTN, DPYSL2, DUSP1, DUSP10, E2F1, ECT2, EDN1, EGR1, EIF2B2, EIF2B3, EIF2B4, EIF4B, EI…
GO:0044711	single-organism biosynthetic process	GO_BiologicalProcess-GOA_09.02.2016_16h18	1.4e-06	3.2e-05	[3]	9.79766	184	[ABAT, ABCA1, ACADM, ACLY, ACOT11, ACSL1, ACSL3, ACSL4, ACSS1, ADI1, ADNP, ADSL, AGPAT1, AK1, AKR1D1, AKT1, ALDH3B1, ALDH7A1, ALG11, APOA2, APOC1, APOC3, APRT, ARF1, ATP1A1, ATP5G2, ATP5I, ATPIF1, AURKAIP1, AZIN1, B4GALT2, BMP4, BPGM, BRCA1, BUD31, C3, CCT2, CDT1, CERS2, CHDH, CHPF, CLSTN1, CMPK1, COQ7, CPS1, CRLS1, CRTC2, CSNK1G2, CTDNEP1, CYGB, CYP19A1, CYP21A2, DCK, DDB1, DHODH, DKC1, DTD1, DT…
GO:1902532	negative regulation of intracellular signal transduction	GO_BiologicalProcess-GOA_09.02.2016_16h18	1.4e-06	3.2e-05	[4, 5, 6, 7]	13.0435	63	[ABL1, ADGRG3, AKT1, AKT1S1, ARHGAP35, ARRB1, BCL2L1, BMP4, C3orf33, CYLD, DAB2IP, DDIT4, DDX3X, DLC1, DLG1, DNAJA3, DUSP1, DUSP10, DUSP14, ERRFI1, EZR, GPD1L, GSTO1, HIF1A, HMGCR, HSPH1, HYOU1, KLF4, LITAF, LRRK2, LYN, MAPKAP1, MCL1, MIF, NFE2L2, NFKBIB, NFKBID, NOL3, PBK, PDCD4, PDCD6, PIBF1, PPP2R1A, RACK1, RIPK1, RPL10, SEC14L1, SENP2, SERPINE2, SOCS7, SOD2, SORL1, SPINK1, SPRED2, SPRY1, STK3…
GO:0044772	mitotic cell cycle phase transition	GO_BiologicalProcess-GOA_09.02.2016_16h18	1.4e-06	3.3e-05	[5, 6]	12.8968	65	[ABCB1, AKT1, ALMS1, ANAPC10, ANLN, APP, BACH1, BRIP1, CCNA2, CCND1, CDC25A, CDK1, CDKN1A, CDT1, CEP192, CEP290, CEP57, CREBBP, DDB1, DDX3X, DUSP1, DYNC1H1, E2F1, ECD, EIF4E, EP300, ERCC2, FANCI, FOXO4, GFI1, GIGYF2, GSPT1, LIN54, MCM10, MCM2, MCM7, NEK6, NUMA1, PLCB1, PPP2R1A, PPP3CA, PRIM1, PRIM2, PSMA3, PSMA5, PSMA7, PSMB4, PSMC5, PSME3, PSMG2, RAB11A, RAB8A, RAD51B, RDX, RPS6KB1, RRM2, SENP2,…
GO:1901657	glycosyl compound metabolic process	GO_BiologicalProcess-GOA_09.02.2016_16h18	1.6e-06	3.6e-05	[3, 4]	13.3949	58	[ADSL, AK1, AKR1B10, AKR1C1, AKR1C2, AKR7A2, APOBEC3C, APOC3, APRT, ATP5G2, ATP5I, ATPIF1, BPGM, CASK, CMPK1, COA6, COQ7, COX5A, DCK, DDIT4, DERA, DHODH, DHTKD1, DLG1, DNPH1, DUT, ECD, ENO1, ERH, GNAI3, GNMT, HIF1A, HMGCR, LRRK2, MAT1A, MIA3, MPP1, MPP2, MSH2, NDUFA10, NDUFA4, NDUFA8, NDUFAB1, NDUFB5, OGDH, PANK1, PAPSS2, PFKFB1, PFKL, PMPCB, QTRT1, SLC25A25, STAT3, STOML2, SULT2A1, UCK2, UQCC2, …
GO:0070887	cellular response to chemical stimulus	GO_BiologicalProcess-GOA_09.02.2016_16h18	1.6e-06	3.6e-05	[3]	9.10613	272	[ABCA1, ABL1, ACSL1, ACSS1, ADD1, ADH4, ADH5, AGPAT1, AHSG, AKR1C1, AKR1C2, AKR7A2, AKT1, AKT1S1, ALDH3B1, AOC3, APH1A, APOC3, APP, APRT, ARHGEF11, ARRB1, ATP1A1, ATP6V0E1, AURKAIP1, AXIN1, B2M, BACH1, BCL2L1, BFAR, BMP4, BNIP3, BPHL, BPTF, BRAF, BRCA1, BRIP1, BUD31, CA9, CAB39, CASK, CBL, CCL16, CCNA2, CCND1, CD40, CDH5, CDK1, CDKN1A, CEP57, CHCHD2, CLIC4, CLSTN1, COL4A6, COQ7, CPS1, CREB3L3, CR…
GO:0044272	sulfur compound biosynthetic process	GO_BiologicalProcess-GOA_09.02.2016_16h18	1.7e-06	3.7e-05	[4]	16.1572	37	[ACLY, ACOT11, ACSL1, ACSL3, ACSL4, ACSS1, ADI1, B4GALT2, CHPF, CSAD, EIF2B2, EIF2B4, ELOVL6, ENOPH1, ESD, GGT1, GLCE, GOT1, GSTA1, GSTM4, GSTO1, GSTZ1, HS3ST3B1, HS3ST5, MAT1A, MGST2, MPST, MTHFD1, MTR, NFE2L2, PAPSS2, PDHB, PDK1, PPT1, SLC25A1, ST3GAL4, THEM4]
GO:0080090	regulation of primary metabolic process	GO_BiologicalProcess-GOA_09.02.2016_16h18	1.9e-06	4.3e-05	[3, 4]	8.30831	498	[ABAT, ABCA1, ABCF1, ABL1, ACADM, ACIN1, ACSL1, ACSL3, ADGRG3, ADNP, AFF1, AFF4, AHSG, AKR1C1, AKT1, AKT1S1, ALPK3, ANAPC10, ANKRD52, ANXA4, APOA2, APOC1, APOC3, APOM, APP, ARF1, ARGLU1, ARHGAP35, ARHGEF11, ARID1B, ARIH2, ARNTL2, ARRB1, ARRDC3, ASF1B, ASXL1, ASXL2, ATAD2, ATF7, ATN1, ATP1A1, ATPIF1, AURKAIP1, AXIN1, AZIN1, BACH1, BAG1, BARD1, BAZ1A, BAZ1B, BMP4, BNIP2, BPGM, BPTF, BRAF, BRCA1, BR…
GO:0006796	phosphate-containing compound metabolic process	GO_BiologicalProcess-GOA_09.02.2016_16h18	2.1e-06	4.5e-05	[4]	8.98111	290	[ABCA1, ABL1, ACP1, ACSL1, ACSL3, ADNP, ADSL, AGPAT1, AHSG, AK1, AKAP8L, AKT1, AKT1S1, ALPK3, APOA2, APOC1, APOC3, APP, APRT, ARF1, ARRB1, ATP1A1, ATP5G2, ATP5I, ATPIF1, AURKAIP1, AXIN1, BAG1, BARD1, BAZ1B, BMP2K, BMP4, BNIP2, BPGM, BRAF, BUD31, C3, C3orf33, CAB39, CAMK2N1, CASK, CCDC6, CCL16, CCNA2, CCND1, CD40, CDC25A, CDC42BPA, CDK1, CDK12, CDK13, CDKN1A, CEP192, CEP290, CKS2, CLSTN1, CMPK1, C…
GO:0051726	regulation of cell cycle	GO_BiologicalProcess-GOA_09.02.2016_16h18	2.1e-06	4.5e-05	[3, 4]	10.737	118	[ABL1, AK1, AKT1, ALPK3, ANAPC10, ANLN, APP, AURKAIP1, BARD1, BCL2L1, BMP4, BRCA1, C8orf4, CAB39, CABLES1, CAMK2N1, CCNA2, CCND1, CDC25A, CDK1, CDK12, CDK13, CDKN1A, CDT1, CHMP4B, CKS2, CREBBP, CUL7, CYLD, DAB2IP, DDB1, DDX3X, DLG1, DTL, DUSP1, E2F1, ECD, ECT2, EDN1, EIF4E, EIF4G2, EP300, ERCC2, FANCI, FOXO4, GBF1, GDNF, GDPD5, GIGYF2, GIT1, GMFB, HCFC1, HHEX, ID3, KIAA0101, KIF23, LIN54, MAP4K3,…
GO:0048519	negative regulation of biological process	GO_BiologicalProcess-GOA_09.02.2016_16h18	2.1e-06	4.6e-05	[1, 2, 3]	8.52972	409	[ABAT, ABCA1, ABCG5, ABHD2, ABL1, ACIN1, ACSL4, ADD1, ADGRG3, ADNP, AHSG, AK1, AKT1, AKT1S1, ANAPC10, ANK2, ANKRD52, ANXA4, ANXA7, APOA2, APOBEC3C, APOC1, APOC3, APOM, APP, ARAP1, ARF1, ARHGAP35, ARRB1, ARRDC3, ASTN2, ASXL1, ASXL2, ATAD2, ATF7, ATG9A, ATN1, ATP1A1, ATPIF1, AURKAIP1, AXIN1, AZGP1, AZIN1, BACH1, BAG1, BARD1, BCL2L1, BFAR, BMP4, BNIP2, BNIP3, BPTF, BRAF, BRCA1, BRIP1, BRMS1L, BTN2A2…
GO:0060255	regulation of macromolecule metabolic process	GO_BiologicalProcess-GOA_09.02.2016_16h18	2.1e-06	4.6e-05	[3, 4]	8.30277	498	[A1CF, ABCF1, ABL1, ACIN1, ACSL1, ACTA2, ACTB, ADGRG3, ADNP, AFF1, AFF4, AHSG, AKR1C1, AKT1, AKT1S1, ALPK3, ANAPC10, ANK2, ANKRD52, ANXA4, ANXA7, APOA2, APOM, APP, ARAP1, ARF1, ARGLU1, ARHGAP35, ARHGEF11, ARID1B, ARIH2, ARNTL2, ARRB1, ARRDC3, ASF1B, ASXL1, ASXL2, ATAD2, ATF7, ATN1, ATPIF1, AURKAIP1, AXIN1, AZIN1, BACH1, BAG1, BARD1, BAZ1A, BAZ1B, BMP4, BNIP2, BPGM, BPTF, BRAF, BRCA1, BRD2, BRIP1,…
GO:0010646	regulation of cell communication	GO_BiologicalProcess-GOA_09.02.2016_16h18	2.2e-06	4.7e-05	[3, 4]	8.99654	286	[ABAT, ABCA1, ABL1, ADGRG3, ADNP, AFAP1, AGPAT1, AHSG, AKR1C2, AKT1, AKT1S1, ANK2, APOC3, APP, ARAP1, ARF1, ARHGAP11A, ARHGAP35, ARHGEF11, ARHGEF28, ARL4D, ARRB1, ARRDC3, ASXL1, ASXL2, ATPIF1, AURKAIP1, AXIN1, BAZ1B, BCL2L1, BFAR, BMP4, BNIP2, BNIP3, BRAF, BRCA1, BUD31, C3, C3orf33, C8orf4, CACNA1D, CAPZB, CASP10, CBL, CC2D1A, CCDC6, CCL16, CCND1, CD40, CDK1, CDK12, CHD8, CHMP4B, CLSTN1, CLSTN3, …
GO:0000122	negative regulation of transcription from RNA polymerase II promoter	GO_BiologicalProcess-GOA_09.02.2016_16h18	2.5e-06	5.2e-05	[6, 7, 8, 9, 10, 11, 12]	11.4796	90	[ANKRD52, ARHGAP35, ASXL1, ASXL2, ATF7, ATN1, AXIN1, BACH1, BMP4, BPTF, BRIP1, BRMS1L, CC2D1A, CCND1, CHD4, CHD8, COPS2, COQ7, CREBBP, CRY2, DAB2IP, DDX5, DKK1, DLG1, DNAJA3, E2F1, EDN1, EFNA1, EGR1, EHMT1, ENO1, EP300, EZR, FHL2, FOXA2, GATAD2B, GDNF, GFI1, HCFC1, HDGF, HHEX, HIF1A, HIVEP1, HNRNPK, ID1, ID3, IRF2, KLF4, MBD2, MBD4, MED1, MTA2, MXD4, NEDD4L, NFKB1, OSR1, PAWR, PEG3, PHF12, PIAS4,…
GO:0051172	negative regulation of nitrogen compound metabolic process	GO_BiologicalProcess-GOA_09.02.2016_16h18	2.6e-06	5.4e-05	[3, 4, 5]	9.99371	159	[ACIN1, ADGRG3, ANKRD52, ANXA4, APOC1, APOC3, ARHGAP35, ARRB1, ASXL1, ASXL2, ATAD2, ATF7, ATN1, AXIN1, BACH1, BARD1, BMP4, BPTF, BRCA1, BRIP1, BRMS1L, BUD31, CBX5, CC2D1A, CCND1, CEBPG, CHD4, CHD8, CNOT3, CNOT6L, COPS2, COQ7, CREBBP, CRY2, CYLD, DAB2IP, DAP, DDIT4, DDX3X, DDX5, DEPDC1, DKK1, DLG1, DNAJA3, DUSP1, E2F1, EDN1, EFNA1, EGR1, EHMT1, EIF2AK3, EIF2B3, EIF2B4, EIF4E, ENO1, ENPP7, EP300, E…
GO:0070972	protein localization to endoplasmic reticulum	GO_BiologicalProcess-GOA_09.02.2016_16h18	2.8e-06	5.6e-05	[6]	18.6207	27	[ANK2, CHMP4B, GBF1, GPAA1, PDIA3, PPP1R15A, PTGES2, RPL10, RPL13, RPL15, RPL18, RPL23A, RPL31, RPL34, RPL37A, RPL5, RPL7, RPS10, RPS11, RPS12, RPS15, RPS16, RPS21, RPS5, RPS8, SPCS3, SRP14]
GO:0044712	single-organism catabolic process	GO_BiologicalProcess-GOA_09.02.2016_16h18	2.7e-06	5.6e-05	[3]	10.5307	125	[ABAT, ACAD9, ACADM, ACADS, ACIN1, ADH4, ADH5, ADSL, AKR1B10, AKR1D1, AKT1, ALDH3B1, ALDH7A1, APOA2, APOBEC3C, APOC1, APOC3, ASB2, ATAT1, ATG2B, ATG9A, ATPIF1, BLVRA, BLVRB, BNIP2, BNIP3, BPGM, CCDC47, COL4A6, CPS1, CSAD, CTSK, CTSL, CYP21A2, CYP4F12, CYP4F2, DDAH1, DDIT4, DECR1, DERA, DHTKD1, DLC1, DLST, DNAJB2, DNPH1, DTD1, DUT, ECD, ECH1, ENO1, ENPP7, ERLIN1, ESD, EVA1B, FAM13B, FUNDC1, FUT6, …
GO:0043603	cellular amide metabolic process	GO_BiologicalProcess-GOA_09.02.2016_16h18	2.9e-06	5.8e-05	[4]	10.7547	114	[ABCF1, ADSL, AKT1, APP, ATN1, ATPIF1, AURKAIP1, BPGM, CASC3, CERS2, CLIC4, CNOT3, CNOT6L, CPS1, CTIF, CYP21A2, DARS, DDX3X, DTD1, EEF1G, EIF1, EIF1AX, EIF1B, EIF2AK3, EIF2B2, EIF2B3, EIF2B4, EIF3B, EIF4B, EIF4E, EIF4G1, EIF4G2, EIF4H, EIF5A, EIF6, ENPP7, EPRS, GDF15, GGT1, GIGYF2, GLO1, GSPT1, GSTA1, GSTM4, GSTO1, GSTZ1, GTF2H3, IARS, IARS2, KARS, MGST2, MRPL42, MRPL52, MRPS26, MRPS36, MTHFD1, M…
GO:0010563	negative regulation of phosphorus metabolic process	GO_BiologicalProcess-GOA_09.02.2016_16h18	3e-06	6e-05	[4, 5, 6]	12.3239	70	[ABL1, AHSG, AKT1, AKT1S1, APOC1, APOC3, ARRB1, BAG1, BMP4, BUD31, C3orf33, CAMK2N1, CDKN1A, CEP192, CRY2, DAB2IP, DDIT4, DKK1, DLG1, DMTN, DNAJA3, DUSP1, DUSP10, DUSP14, EDN1, EPHA1, ERRFI1, EZR, FOXA2, GMFB, GNAI2, GNAI3, GPD1L, GPRC5A, HHEX, HMGCR, HPN, HSPH1, IKBKB, KLF4, LPCAT1, LRRK2, LYN, MPP2, MYO1D, NUCB2, PBK, PDCD4, PIBF1, PLPP3, PPP1R15A, PPP2R1A, PRDX3, PSEN1, RACK1, SOCS7, SORL1, SP…
GO:0045936	negative regulation of phosphate metabolic process	GO_BiologicalProcess-GOA_09.02.2016_16h18	3e-06	6e-05	[5, 6, 7]	12.3239	70	[ABL1, AHSG, AKT1, AKT1S1, APOC1, APOC3, ARRB1, BAG1, BMP4, BUD31, C3orf33, CAMK2N1, CDKN1A, CEP192, CRY2, DAB2IP, DDIT4, DKK1, DLG1, DMTN, DNAJA3, DUSP1, DUSP10, DUSP14, EDN1, EPHA1, ERRFI1, EZR, FOXA2, GMFB, GNAI2, GNAI3, GPD1L, GPRC5A, HHEX, HMGCR, HPN, HSPH1, IKBKB, KLF4, LPCAT1, LRRK2, LYN, MPP2, MYO1D, NUCB2, PBK, PDCD4, PIBF1, PLPP3, PPP1R15A, PPP2R1A, PRDX3, PSEN1, RACK1, SOCS7, SORL1, SP…
GO:0010608	posttranscriptional regulation of gene expression	GO_BiologicalProcess-GOA_09.02.2016_16h18	3.1e-06	6.2e-05	[5, 6]	12.959	60	[A1CF, ABCF1, AKT1, APP, CASC3, CNOT3, CNOT6L, CTIF, DDX3X, DKC1, DTD1, E2F1, EIF1, EIF1B, EIF2AK3, EIF2B2, EIF2B3, EIF2B4, EIF3B, EIF4B, EIF4E, EIF4G1, EIF4G2, EIF4H, EIF5A, EIF6, EPRS, EXOSC7, GDNF, GIGYF2, IARS, IARS2, NSUN4, PABPC1, PIWIL2, POU5F1, PPP1R15A, PSMA3, PSMA5, PSMA7, PSMB4, PSMC5, PSME3, PTAFR, RACK1, RAN, RBM10, RPS5, RPS6KB1, SELT, SLC11A1, SRRT, TNRC6B, TSC1, UBC, UHMK1, UPF3A,…
GO:0022411	cellular component disassembly	GO_BiologicalProcess-GOA_09.02.2016_16h18	3.4e-06	6.6e-05	[3]	11.33	92	[ACIN1, ADD1, ASB2, ATG2B, ATG9A, ATPIF1, AURKAIP1, BNIP3, CAPN1, CAPZB, CDK1, CFL2, COL4A6, CTDNEP1, CTSK, CTSL, CTSV, DDIT4, DMTN, DSTN, EIF5A, EVA1B, EXOC8, FAM13B, FAM21C, FUNDC1, GBF1, GSPT1, HIF1A, HPN, KIF24, KPNA1, LAMC1, MAP1LC3B, MDH1, MEX3C, MMP11, MMP15, MRPL42, MRPL52, MRPS26, MRPS36, MYLK, NAPB, NCAPG, NDEL1, NEK6, NR2C2, NUP107, NUP155, NUP210, NUP37, NUP58, PDK1, PSEN1, PTGES2, RD…
GO:0006259	DNA metabolic process	GO_BiologicalProcess-GOA_09.02.2016_16h18	3.6e-06	6.9e-05	[4, 5, 6]	10.8242	109	[ABL1, AKT1, APOBEC3C, BACH1, BARD1, BAZ1A, BAZ1B, BMP4, BOD1L1, BRCA1, BRIP1, CCNB1IP1, CCT2, CD40, CDC25A, CDK1, CDKN1A, CDT1, CEBPG, CHRAC1, COPS2, CRY2, DDB1, DKC1, DNAJA3, DTD1, DTL, DUSP1, DUT, EHMT1, ENPP7, EP300, ERCC2, ERI2, ESCO2, FANCI, GATAD2B, GDNF, GINS1, GINS3, GTF2H3, HMBOX1, HUWE1, ID3, KDM4A, KIAA0101, KLF4, KPNA1, LIG1, MBD4, MCM10, MCM2, MCM7, MDC1, MGMT, MLH1, MSH2, MTA2, MYO…
GO:0006518	peptide metabolic process	GO_BiologicalProcess-GOA_09.02.2016_16h18	3.6e-06	6.9e-05	[4, 5]	11.1237	98	[ABCF1, AKT1, APP, ATN1, AURKAIP1, CASC3, CLIC4, CNOT3, CNOT6L, CTIF, DARS, DDX3X, DTD1, EEF1G, EIF1, EIF1AX, EIF1B, EIF2AK3, EIF2B2, EIF2B3, EIF2B4, EIF3B, EIF4B, EIF4E, EIF4G1, EIF4G2, EIF4H, EIF5A, EIF6, EPRS, GDF15, GGT1, GIGYF2, GLO1, GSPT1, GSTA1, GSTM4, GSTO1, GSTZ1, GTF2H3, IARS, IARS2, KARS, MGST2, MRPL42, MRPL52, MRPS26, MRPS36, MYCBP2, NFE2L2, NSUN4, PABPC1, PCSK6, PIWIL2, POU5F1, PPP1…
GO:0072594	establishment of protein localization to organelle	GO_BiologicalProcess-GOA_09.02.2016_16h18	3.9e-06	7.2e-05	[4, 5, 6]	11.6643	82	[AKT1, ARIH2, ATPIF1, AURKAIP1, AXIN1, BMP4, BRCA1, C8orf4, CCT2, CDK1, CDKN1A, CEP57, CHCHD2, CHMP4B, CRY2, CSE1L, CTSK, CYLD, DAB2IP, DDX58, DKC1, E2F1, ECT2, GNPTAB, HSPA4, HSPH1, HUWE1, JAK2, KPNA1, LAMP1, LITAF, LRRK2, MBD4, MBTPS1, MED1, NCKIPSD, NFKBIB, NFKBIE, NOL3, NUP107, NUP155, NUP58, PDIA3, PEX10, PLAGL2, PMPCB, POU5F1, PPP3CA, RAB11A, RAN, RPL10, RPL13, RPL15, RPL18, RPL23A, RPL31, …
GO:0070647	protein modification by small protein conjugation or removal	GO_BiologicalProcess-GOA_09.02.2016_16h18	3.8e-06	7.2e-05	[6, 7]	10.7383	112	[ABL1, AKT1, ANAPC10, ARIH2, ARRB1, ARRDC3, ASB2, ASXL1, AXIN1, BACH1, BARD1, BFAR, BLMH, BRCA1, BRIP1, CBL, CCNB1IP1, CDK1, COPS2, CUL7, CYLD, DCAF5, DCAF7, DCUN1D2, DDB1, DDRGK1, DNAJA3, DNAJB2, DTL, DUSP1, EGR1, FANCI, GAN, HECTD4, HNRNPK, HUWE1, KLHL29, KLHL42, LRRK2, LTN1, MBD4, MDC1, MED1, MED11, MED17, MIA3, MIB2, MYCBP2, NEDD4L, NFE2L2, NUP107, NUP155, NUP210, NUP37, NUP58, OTUD5, PAXIP1,…
GO:0080134	regulation of response to stress	GO_BiologicalProcess-GOA_09.02.2016_16h18	3.8e-06	7.2e-05	[3, 4]	9.99351	154	[ABAT, ABL1, ACIN1, AHSG, AKR1C1, AKT1, AKT1S1, ALKBH5, AP1G1, AP1S2, ARF1, ASB2, AXIN1, B2M, BAG1, BCL2L1, BFAR, BNIP3, BRAF, BRCA1, C3, CASK, CCL16, CEBPG, CFI, CHCHD2, CHMP4B, CNPY3, CREB3L3, CREBBP, CTSK, CTSL, CYLD, CYP19A1, DAB2IP, DDX5, DDX58, DLC1, DLG1, DMTN, DNAJA3, DNAJB1, DUSP10, EDN1, EIF2AK3, EP300, ERRFI1, EZR, FAM13B, FAM46A, FEZ2, FKBPL, FOXA2, GDNF, GFI1, GGT1, HIF1A, HLA-A, HMG…
GO:0019637	organophosphate metabolic process	GO_BiologicalProcess-GOA_09.02.2016_16h18	4e-06	7.4e-05	[3, 4]	10.5309	121	[ABCA1, ACSL3, ADNP, ADSL, AGPAT1, AK1, APOA2, APOC1, APOC3, APRT, ARF1, ATP5G2, ATP5I, ATPIF1, BPGM, BUD31, CASK, CEP290, CLSTN1, CMPK1, COA6, COQ7, COX5A, CPS1, CRLS1, CYP21A2, DAB2IP, DCK, DDIT4, DERA, DHODH, DHTKD1, DLG1, DLST, DNPH1, DUT, ECD, EDN1, ENO1, ENPP7, ERH, FAR1, FDPS, G6PC, GNAI2, GNAI3, GPAA1, GPD1L, GPLD1, HADHB, HIF1A, HMGCR, IMPAD1, INPP1, IP6K2, KARS, KHK, KLF4, LPCAT1, LRRK2…
GO:0006403	RNA localization	GO_BiologicalProcess-GOA_09.02.2016_16h18	4.2e-06	7.6e-05	[3]	16.1905	34	[A1CF, ALKBH5, CASC3, CCT2, CPSF1, DHX38, DKC1, EIF4E, EIF5A, HHEX, IWS1, NPIPA1, NUP107, NUP155, NUP210, NUP37, NUP58, NXF1, RAN, RUVBL2, SENP2, SLC6A4, SRSF3, SRSF4, SRSF7, SUPT6H, THOC1, TNIP1, TOMM20, TSC1, UPF2, UPF3A, XPO7, YY1]
GO:0009123	nucleoside monophosphate metabolic process	GO_BiologicalProcess-GOA_09.02.2016_16h18	4.6e-06	8.3e-05	[5, 6, 7]	14.3791	44	[ADSL, AK1, APOC3, APRT, ATP5G2, ATP5I, ATPIF1, BPGM, CASK, CMPK1, COA6, COQ7, COX5A, DCK, DDIT4, DHODH, DHTKD1, DLG1, DNPH1, DUT, ECD, ENO1, HIF1A, MIA3, MPP1, MPP2, MSH2, NDUFA10, NDUFA4, NDUFA8, NDUFAB1, NDUFB5, OGDH, PAICS, PFAS, PFKFB1, PFKL, PMPCB, SLC25A25, STAT3, STOML2, UCK2, UQCC2, UQCRC1]
GO:0006974	cellular response to DNA damage stimulus	GO_BiologicalProcess-GOA_09.02.2016_16h18	5e-06	8.9e-05	[4]	11.1913	93	[ABL1, AKT1, BACH1, BARD1, BAZ1B, BCL2L1, BOD1L1, BRCA1, BRIP1, CCNA2, CCND1, CDK1, CDKN1A, CEBPG, CHCHD6, COPS2, CRY2, DDB1, DDIT4, DDX5, DTL, E2F1, EP300, ERCC2, ESCO2, FANCI, FOXO4, GDNF, GIGYF2, GTF2H3, HNRNPK, HUWE1, KDM4A, KIAA0101, LIG1, LYN, MBD4, MCL1, MCM10, MCM7, MDC1, MGMT, MIF, MLH1, MRPS26, MSH2, NEIL2, NEK6, NPAS2, NUPR1, PAXIP1, PIAS4, PMS2P3, POLQ, PPP1R15A, PSEN1, PSMA3, PSMA5, …
GO:0048583	regulation of response to stimulus	GO_BiologicalProcess-GOA_09.02.2016_16h18	5.2e-06	9.2e-05	[2, 3]	8.68011	340	[ABAT, ABCA1, ABL1, ACIN1, ACTB, ADGRG3, AFAP1, AGPAT1, AHSG, AKR1C1, AKR1C2, AKT1, AKT1S1, ALKBH5, AP1G1, AP1S2, APOA2, APOC3, APP, ARAP1, ARF1, ARHGAP11A, ARHGAP35, ARHGEF11, ARHGEF28, ARL4D, ARPC3, ARRB1, ARRDC3, ASB2, ASXL1, ASXL2, ATPIF1, AURKAIP1, AXIN1, B2M, BAG1, BAZ1B, BCL2L1, BFAR, BMP4, BNIP2, BNIP3, BRAF, BRCA1, BUD31, C3, C3orf33, C8orf4, CAPZB, CASK, CASP10, CBL, CC2D1A, CCDC6, CCL1…
GO:0016567	protein ubiquitination	GO_BiologicalProcess-GOA_09.02.2016_16h18	5.2e-06	9.2e-05	[8, 9]	11.2782	90	[ABL1, AKT1, ANAPC10, ARIH2, ARRB1, ARRDC3, ASB2, AXIN1, BACH1, BARD1, BFAR, BLMH, BRCA1, BRIP1, CBL, CCNB1IP1, CDK1, CUL7, DCAF5, DCAF7, DCUN1D2, DDB1, DNAJA3, DNAJB2, DTL, DUSP1, FANCI, GAN, HECTD4, HUWE1, KLHL29, KLHL42, LRRK2, LTN1, MBD4, MED1, MED11, MED17, MIB2, MYCBP2, NEDD4L, NFE2L2, PAXIP1, PSEN1, PSMA3, PSMA5, PSMA7, PSMB4, PSMC5, PSME3, PSMG2, RBBP6, RNF11, RNF130, RNF141, RNF213, RNF6…
GO:0006081	cellular aldehyde metabolic process	GO_BiologicalProcess-GOA_09.02.2016_16h18	5.7e-06	9.8e-05	[3]	21.5054	20	[ADH4, ADH5, AKR1B10, AKR1C1, AKR7A2, ALDH3B1, ALDH7A1, BPGM, DERA, DHTKD1, DLST, ESD, GLO1, GRHPR, KHK, NDUFAB1, OGDH, PDHB, PGD, RPE]
GO:0071426	ribonucleoprotein complex export from nucleus	GO_BiologicalProcess-GOA_09.02.2016_16h18	5.7e-06	9.8e-05	[4, 5, 6, 8]	21.5054	20	[ALKBH5, CPSF1, DHX38, EIF4E, EIF5A, EIF6, HHEX, IWS1, NUP107, NUP155, NXF1, RAN, RPS15, SRSF3, SRSF4, SRSF7, SUPT6H, THOC1, TSC1, UPF2]
GO:0048193	Golgi vesicle transport	GO_BiologicalProcess-GOA_09.02.2016_16h18	7.1e-06	0.00011	[5, 6]	13.6752	48	[ACSL3, AKR1B10, ANK2, AP1G1, AP1S2, APP, ARF1, ARFRP1, ARRB1, BLOC1S6, CNIH1, COG2, COPZ1, DCTN6, DOPEY2, DYNC1H1, F5, GBF1, GOLGA3, GOLPH3, HYOU1, KIF1C, LAMP1, LYPLA1, LYPLAL1, MIA3, MYO18A, NAPG, PPP6R3, PRKCI, PTGES2, RAB1B, RAB29, RAB35, RAB8A, RACK1, SEC24C, SLC6A4, SNX8, SORL1, SORT1, TBC1D20, TFG, TRAPPC4, VAMP8, VTI1A, WIPI1, YKT6]
GO:0031326	regulation of cellular biosynthetic process	GO_BiologicalProcess-GOA_09.02.2016_16h18	7e-06	0.00011	[4, 5]	8.54839	371	[ABCA1, ABCF1, ABL1, ACADM, ACSL3, ADGRG3, ADNP, AFF1, AFF4, AKT1, ALPK3, ANKRD52, ANXA4, APOA2, APOC1, APOC3, APP, ARGLU1, ARHGAP35, ARHGEF11, ARID1B, ARNTL2, ARRB1, ASF1B, ASXL1, ASXL2, ATAD2, ATF7, ATN1, ATP1A1, AURKAIP1, AXIN1, BACH1, BAG1, BAZ1A, BAZ1B, BMP4, BPTF, BRCA1, BRD2, BRIP1, BRMS1L, BUD31, C3, C3orf33, C8orf4, CA9, CASC3, CASK, CBL, CBX5, CC2D1A, CCNA2, CCND1, CCT2, CD40, CDCA7, CD…
GO:0043068	positive regulation of programmed cell death	GO_BiologicalProcess-GOA_09.02.2016_16h18	6.8e-06	0.00011	[4, 5, 6]	11.7925	75	[ABL1, ACIN1, ADAMTSL4, AKT1, APH1A, ARHGEF11, ARRB1, ATPIF1, BAG1, BARD1, BCL2L1, BMP4, BNIP3, BRMS1L, BUD31, CD40, CDKN1A, CYLD, DAB2IP, DAP, DDX3X, DFNA5, DHODH, DLC1, DNAJA3, DUSP1, E2F1, ECT2, EIF2AK3, FGD4, GDNF, GPLD1, HIF1A, HMGCR, ID3, IGF2R, IP6K2, ITGA6, ITGB3BP, JAK2, KNG1, LRRK2, LYN, MCL1, NCOA1, NFKBID, NGEF, NGFRAP1, NQO1, NUPR1, OSGIN1, PAWR, PDCD4, PDCD6, PDIA3, PIAS4, PLAGL2, P…
GO:0016197	endosomal transport	GO_BiologicalProcess-GOA_09.02.2016_16h18	7e-06	0.00011	[5, 6]	14.8855	39	[ABCA1, AKR1B10, ALMS1, AP1G1, ARF1, ARFRP1, BLOC1S6, CHMP4B, DOPEY2, EMP2, EZR, FAM160A2, FAM21C, GBF1, HMGXB4, LRRK2, MYO1D, NDRG4, PTGES2, RAB11A, RAB29, RAB35, RAB9A, RDX, RHOBTB3, SLC6A4, SNX18, SNX3, SNX8, SORL1, SORT1, TINAGL1, TOM1, UBC, USP6NL, VPS53, VTI1A, WIPI1, YKT6]
GO:0000226	microtubule cytoskeleton organization	GO_BiologicalProcess-GOA_09.02.2016_16h18	7.6e-06	0.00012	[4, 5]	12.7473	58	[ABL1, ATAT1, AXIN1, BNIP2, BRCA1, CAPZB, CDC42BPA, CDK1, CEP192, CEP57, CHD4, CHMP4B, CUL7, CYLD, DCTN6, DLG1, DOCK7, DYNC1H1, ECT2, EZR, FKBPL, HAUS6, KIAA0101, KIF23, KIF24, MAP1B, MAP7D1, MAPRE2, MLH1, NDEL1, NEK6, NUMA1, NUSAP1, PIBF1, PPP2R1A, RAB11A, RAN, SKA1, SLC16A1, SLC6A4, SON, SPDL1, SPRY1, STIL, STMN1, SUN2, TACC1, TACC2, TBCD, TPX2, TRAF3IP1, TTK, TTL, TTLL5, TUBA1B, TUBB, TUBB1, X…
GO:0009889	regulation of biosynthetic process	GO_BiologicalProcess-GOA_09.02.2016_16h18	7.7e-06	0.00012	[3, 4]	8.53102	374	[ABCA1, ABCF1, ABL1, ACADM, ACSL3, ADGRG3, ADNP, AFF1, AFF4, AKT1, ALPK3, ANKRD52, ANXA4, APOA2, APOC1, APOC3, APP, ARGLU1, ARHGAP35, ARHGEF11, ARID1B, ARNTL2, ARRB1, ASF1B, ASXL1, ASXL2, ATAD2, ATF7, ATN1, ATP1A1, AURKAIP1, AXIN1, BACH1, BAG1, BAZ1A, BAZ1B, BMP4, BPTF, BRCA1, BRD2, BRIP1, BRMS1L, BUD31, C3, C3orf33, C8orf4, CA9, CASC3, CASK, CBL, CBX5, CC2D1A, CCNA2, CCND1, CCT2, CD40, CDCA7, CD…
GO:0015758	glucose transport	GO_BiologicalProcess-GOA_09.02.2016_16h18	7.3e-06	0.00012	[7, 8]	17.3913	28	[AKT1, BRAF, C3, EDN1, EZR, G6PC, GNAI2, GPC3, NFE2L2, NUP107, NUP155, NUP210, NUP37, NUP58, PRKCI, REPIN1, RPS6KB1, SLC2A1, SLC2A10, SLC2A2, SLC2A3, SLC2A9, SLC37A4, SORT1, STXBP4, TRIB3, TSC1, VIL1]
GO:0071705	nitrogen compound transport	GO_BiologicalProcess-GOA_09.02.2016_16h18	7.3e-06	0.00012	[4]	11.0588	94	[ABAT, ABCA1, ALKBH5, ARRB1, AZIN1, C8orf4, CACNA1D, CASC3, CPSF1, CYLD, DDC, DHX38, DPYSL2, EDN1, EIF2AK3, EIF4E, EIF5A, FOXA2, GDNF, GJB1, GNAI2, GPLD1, HADH, HHEX, HIF1A, HMGCR, IL1RN, IWS1, JAK2, KCNJ10, LITAF, LYN, MIF, NFKBIB, NFKBIE, NOL3, NPIPA1, NUCB2, NUP107, NUP155, NUP210, NUP37, NUP58, NXF1, PDE7A, PFKL, PIM3, PPP3CA, PSEN1, RAB3B, RAN, RIPK1, RPL10, SEC14L1, SENP2, SERINC3, SLC11A1,…
GO:0009116	nucleoside metabolic process	GO_BiologicalProcess-GOA_09.02.2016_16h18	8.6e-06	0.00013	[4, 5, 6]	13.012	54	[ADSL, AK1, APOBEC3C, APOC3, APRT, ATP5G2, ATP5I, ATPIF1, BPGM, CASK, CMPK1, COA6, COQ7, COX5A, DCK, DDIT4, DERA, DHODH, DHTKD1, DLG1, DNPH1, DUT, ECD, ENO1, ERH, GNAI3, GNMT, HIF1A, HMGCR, LRRK2, MAT1A, MIA3, MPP1, MPP2, MSH2, NDUFA10, NDUFA4, NDUFA8, NDUFAB1, NDUFB5, OGDH, PANK1, PAPSS2, PFKFB1, PFKL, PMPCB, QTRT1, SLC25A25, STAT3, STOML2, SULT2A1, UCK2, UQCC2, UQCRC1]
GO:0048523	negative regulation of cellular process	GO_BiologicalProcess-GOA_09.02.2016_16h18	8.1e-06	0.00013	[2, 3, 4]	8.52028	376	[ABAT, ABCA1, ABHD2, ABL1, ACIN1, ADD1, ADGRG3, ADNP, AHSG, AK1, AKT1, AKT1S1, ANAPC10, ANK2, ANKRD52, ANXA4, APOA2, APOBEC3C, APOC1, APOC3, APOM, APP, ARAP1, ARF1, ARHGAP35, ARRB1, ASTN2, ASXL1, ASXL2, ATAD2, ATF7, ATN1, ATP1A1, ATPIF1, AURKAIP1, AXIN1, AZGP1, BACH1, BAG1, BARD1, BCL2L1, BFAR, BMP4, BNIP2, BNIP3, BPTF, BRAF, BRCA1, BRIP1, BRMS1L, BTN2A2, BUD31, C3, C3orf33, C8orf4, CAB39, CAMK2N…
GO:0006915	apoptotic process	GO_BiologicalProcess-GOA_09.02.2016_16h18	8.2e-06	0.00013	[5]	9.48319	189	[ABL1, ACIN1, ADAMTSL4, ADD1, ADNP, AKT1, AKT1S1, ANXA4, APH1A, APP, ARHGEF11, ARRB1, ATN1, ATPIF1, AXIN1, BAG1, BARD1, BCL2L1, BFAR, BMP4, BNIP2, BNIP3, BRAF, BRCA1, BRMS1L, BUD31, C3orf38, C8orf4, CASP10, CBL, CD40, CDCA7, CDK1, CDKN1A, CHD8, CLIC4, CRLF1, CSE1L, CTSL, CYLD, DAB2IP, DAP, DDB1, DDIT4, DDX3X, DDX5, DFNA5, DHODH, DIDO1, DLC1, DNAJA3, DUSP1, E2F1, ECT2, EDN1, EGR1, EIF2AK3, EIF5A, …
GO:0008645	hexose transport	GO_BiologicalProcess-GOA_09.02.2016_16h18	9.3e-06	0.00014	[6, 7]	17.1779	28	[AKT1, BRAF, C3, EDN1, EZR, G6PC, GNAI2, GPC3, NFE2L2, NUP107, NUP155, NUP210, NUP37, NUP58, PRKCI, REPIN1, RPS6KB1, SLC2A1, SLC2A10, SLC2A2, SLC2A3, SLC2A9, SLC37A4, SORT1, STXBP4, TRIB3, TSC1, VIL1]
GO:0044092	negative regulation of molecular function	GO_BiologicalProcess-GOA_09.02.2016_16h18	1e-05	0.00015	[3]	10.3128	122	[ABL1, ADGRG3, ADNP, AHSG, AKT1, AKT1S1, ANAPC10, ANKRD52, ANXA4, APOA2, APOC1, APOC3, APP, ARRB1, ATPIF1, AURKAIP1, B2M, BMP4, BRMS1L, C3, CAB39, CAMK2N1, CDKN1A, CEBPG, CEP192, COPS2, CRY2, CYLD, DAB2IP, DAP, DDX3X, DKK1, DLC1, DNAJA3, DUSP1, DUSP10, DUSP14, E2F1, EPHA1, ERRFI1, FOXA2, GFI1, GMFB, GNAI2, GNAI3, GPC3, GPRC5A, GSTO1, HHEX, HMGCR, HNRNPK, HPN, ID1, ID3, IKBKB, IQGAP2, ITIH5, JAK2,…
GO:0030163	protein catabolic process	GO_BiologicalProcess-GOA_09.02.2016_16h18	1e-05	0.00015	[4, 5]	11.0312	92	[AKT1, ANAPC10, ARIH2, ARRB1, ASB2, ATPIF1, AXIN1, AZIN1, BARD1, BFAR, BNIP3, CBL, CCDC47, CDK1, CHMP4B, CLPX, CPVL, CTSK, CTSL, CTSV, CUL7, CYLD, DAB2IP, DDB1, DDRGK1, DNAJB2, DTL, DUSP1, ERLIN1, EZR, GAN, GPC3, GPLD1, HECTD4, HUWE1, KLHL42, LPCAT1, LRRK2, LYPLA1, LYPLAL1, MVB12B, MYCBP2, NEDD4L, NFE2L2, NGLY1, NKD1, PBK, PPT1, PSEN1, PSMA3, PSMA5, PSMA7, PSMB4, PSMC5, PSME3, PSMG2, RACK1, RAD23…
GO:0042326	negative regulation of phosphorylation	GO_BiologicalProcess-GOA_09.02.2016_16h18	1e-05	0.00015	[6, 7, 8]	12.7854	56	[ABL1, AHSG, AKT1, AKT1S1, APOC3, ARRB1, BAG1, BMP4, C3orf33, CAMK2N1, CDKN1A, DAB2IP, DDIT4, DKK1, DLG1, DMTN, DNAJA3, DUSP1, DUSP10, DUSP14, EPHA1, ERRFI1, EZR, FOXA2, GMFB, GPD1L, GPRC5A, HHEX, HMGCR, HSPH1, KLF4, LRRK2, LYN, PBK, PDCD4, PIBF1, PLPP3, PPP1R15A, PPP2R1A, PRDX3, PSEN1, RACK1, SOCS7, SORL1, SPINK1, SPRED2, SPRY1, STAT3, STK38, TNFAIP3, TNIP1, TRAF3IP1, TRIB3, UBASH3B, UBE2C, ZGPA…
GO:0071166	ribonucleoprotein complex localization	GO_BiologicalProcess-GOA_09.02.2016_16h18	1.1e-05	0.00016	[3]	20.6186	20	[ALKBH5, CPSF1, DHX38, EIF4E, EIF5A, EIF6, HHEX, IWS1, NUP107, NUP155, NXF1, RAN, RPS15, SRSF3, SRSF4, SRSF7, SUPT6H, THOC1, TSC1, UPF2]
GO:0000096	sulfur amino acid metabolic process	GO_BiologicalProcess-GOA_09.02.2016_16h18	1.2e-05	0.00017	[4, 5, 7, 8]	26.4151	14	[ADI1, CPS1, CSAD, CYP21A2, EIF2B2, EIF2B4, ENOPH1, GGT1, GNMT, GOT1, MAT1A, MPST, MTHFD1, MTR]
GO:0051186	cofactor metabolic process	GO_BiologicalProcess-GOA_09.02.2016_16h18	1.2e-05	0.00017	[3]	13.0326	52	[ACLY, ACOT11, ACSL1, ACSL3, ACSL4, ACSS1, ADH4, AKR1B10, AKR1C1, AKR1C2, AKR7A2, ATPIF1, BLVRA, BLVRB, BPGM, COQ7, CYP4F2, DDIT4, DERA, DHTKD1, DLST, ECD, ELOVL6, ENO1, FAR1, GNMT, GPD1L, HIF1A, HMGCR, MAT1A, MDH1, ME2, MIA3, MTHFD1, MVD, MVK, NAMPT, OGDH, PANK1, PDHB, PDK1, PFKFB1, PFKL, PGD, PIPOX, PPT1, RPE, SLC11A2, SLC25A1, STAT3, SUCLG2, THEM4]
GO:0009069	serine family amino acid metabolic process	GO_BiologicalProcess-GOA_09.02.2016_16h18	1.2e-05	0.00017	[5, 6, 8, 9]	17.9856	25	[DMGDH, GCAT, GGT1, MPST, MTHFD1, PSAT1, RPL10, RPL13, RPL15, RPL18, RPL23A, RPL31, RPL34, RPL37A, RPL5, RPL7, RPS10, RPS11, RPS12, RPS15, RPS16, RPS21, RPS5, RPS8, SEPHS2]
GO:0012501	programmed cell death	GO_BiologicalProcess-GOA_09.02.2016_16h18	1.1e-05	0.00017	[4]	9.4246	190	[ABL1, ACIN1, ADAMTSL4, ADD1, ADNP, AKT1, AKT1S1, ANXA4, APH1A, APP, ARHGEF11, ARRB1, ATN1, ATPIF1, AXIN1, BAG1, BARD1, BCL2L1, BFAR, BMP4, BNIP2, BNIP3, BRAF, BRCA1, BRMS1L, BUD31, C3orf38, C8orf4, CASP10, CBL, CD40, CDCA7, CDK1, CDKN1A, CHD8, CLIC4, CRLF1, CSE1L, CTSL, CTSV, CYLD, DAB2IP, DAP, DDB1, DDIT4, DDX3X, DDX5, DFNA5, DHODH, DIDO1, DLC1, DNAJA3, DUSP1, E2F1, ECT2, EDN1, EGR1, EIF2AK3, E…
GO:0015749	monosaccharide transport	GO_BiologicalProcess-GOA_09.02.2016_16h18	1.1e-05	0.00017	[5, 6]	16.9697	28	[AKT1, BRAF, C3, EDN1, EZR, G6PC, GNAI2, GPC3, NFE2L2, NUP107, NUP155, NUP210, NUP37, NUP58, PRKCI, REPIN1, RPS6KB1, SLC2A1, SLC2A10, SLC2A2, SLC2A3, SLC2A9, SLC37A4, SORT1, STXBP4, TRIB3, TSC1, VIL1]
GO:0032369	negative regulation of lipid transport	GO_BiologicalProcess-GOA_09.02.2016_16h18	1.1e-05	0.00017	[3, 4, 5, 6, 7]	35.7143	10	[ABCG5, ACSL4, AKT1, APOA2, APOC1, APOC3, CRY2, CYP4F2, ITGAV, NFKB1]
GO:1901135	carbohydrate derivative metabolic process	GO_BiologicalProcess-GOA_09.02.2016_16h18	1.2e-05	0.00018	[3]	9.91053	144	[ABCA1, ADAMTSL4, ADNP, ADSL, AK1, AKR1B10, AKR1C1, AKR1C2, AKR7A2, AKT1, ALG11, ANK2, APOBEC3C, APOC3, APRT, ARSG, ARSI, ATP5G2, ATP5I, ATPIF1, B3GLCT, B4GALT2, BPGM, BUD31, CASK, CCDC126, CEP290, CHPF, CMPK1, CNIH1, COA6, COG2, COPZ1, COQ7, COX5A, DCK, DCTN6, DDIT4, DERA, DHODH, DHTKD1, DLG1, DNPH1, DPY19L3, DUT, DYNC1H1, ECD, EDN1, ENO1, ENPP7, ERH, F5, FUT6, G6PC, GBF1, GLCE, GNAI2, GNAI3, GN…
GO:0010256	endomembrane system organization	GO_BiologicalProcess-GOA_09.02.2016_16h18	1.4e-05	0.0002	[3]	11.9217	67	[ABCA1, ACSL3, AKR1B10, AKT1, ANK2, ARFRP1, ATP8B2, BCL2L1, CCDC47, CDK1, CHMP4B, COG2, CTDNEP1, CUL7, DLG1, DOPEY2, EIF2AK3, EMP2, EXOC8, EZR, FAM160A2, FAT4, GBF1, GOLPH3, IKBKB, KIAA1715, KIFC3, LIN7C, LRRK2, LYPLA1, LYPLAL1, MTSS1, MTSS1L, MYH10, MYO18A, NDEL1, NEK6, NUMB, NUP107, NUP155, NUP210, NUP37, NUP58, NUSAP1, PLSCR4, PPP2R1A, PRKCI, PTGES2, RAB11A, RAB29, RAB8A, RACK1, RDX, RILPL2, S…
GO:0006357	regulation of transcription from RNA polymerase II promoter	GO_BiologicalProcess-GOA_09.02.2016_16h18	1.4e-05	0.0002	[6, 7, 8, 9, 10, 11]	9.47368	180	[ABL1, AKT1, ANKRD52, ANXA4, APP, ARHGAP35, ARNTL2, ARRB1, ASXL1, ASXL2, ATAD2, ATF7, ATN1, AXIN1, BACH1, BAG1, BMP4, BPTF, BRCA1, BRD2, BRIP1, BRMS1L, BUD31, CA9, CASK, CC2D1A, CCND1, CD40, CDK1, CDK12, CDK13, CDT1, CEBPG, CHCHD2, CHD4, CHD8, COPS2, COQ7, CREB3L3, CREBBP, CRTC2, CRY2, DAB2IP, DDX3X, DDX5, DDX58, DKK1, DLG1, DNAJA3, E2F1, EDN1, EFNA1, EGR1, EHMT1, EIF2AK3, ENO1, EP300, ERCC2, ERL…
GO:0044257	cellular protein catabolic process	GO_BiologicalProcess-GOA_09.02.2016_16h18	1.4e-05	0.0002	[5, 6]	11.4202	78	[AKT1, ANAPC10, ARIH2, ARRB1, ASB2, ATPIF1, AXIN1, BFAR, BNIP3, CBL, CCDC47, CDK1, CHMP4B, CLPX, CPVL, CTSK, CTSL, CTSV, CUL7, CYLD, DAB2IP, DDB1, DDRGK1, DNAJB2, DTL, DUSP1, ERLIN1, EZR, GAN, HECTD4, HUWE1, KLHL42, LRRK2, MVB12B, NEDD4L, NFE2L2, PBK, PPT1, PSEN1, PSMA3, PSMA5, PSMA7, PSMB4, PSMC5, PSME3, PSMG2, RACK1, RAD23B, RBBP6, RDX, RIPK1, RNF11, RNF6, RNF7, RNF8, SIAH2, TINAGL1, TNFAIP1, T…
GO:0006631	fatty acid metabolic process	GO_BiologicalProcess-GOA_09.02.2016_16h18	1.5e-05	0.00021	[4, 5, 7, 8]	13.0102	51	[ACAD9, ACADM, ACADS, ACLY, ACOT11, ACSL1, ACSL3, ACSL4, ACSS1, AKR1C2, AKT1, APOC1, APOC3, BRCA1, C3, CYGB, CYP4F12, CYP4F2, DECR1, ECH1, ECHDC2, EDN1, EIF2AK3, ELOVL6, ERLIN1, GGT1, HACL1, HADH, HADHB, HSD17B8, IVD, LYPLA1, MGST2, MIF, MORC2, MSMO1, MYCBP2, NDUFAB1, NUCB2, PDHB, PDK1, PECR, PHYH, PIBF1, PPARG, PRKAB1, PTGES2, PTGES3, THEM4, TRIB3, VDAC2]
GO:0006091	generation of precursor metabolites and energy	GO_BiologicalProcess-GOA_09.02.2016_16h18	1.6e-05	0.00022	[3]	12.1154	63	[ACAD9, ACADM, ACLY, ADSL, AGPAT1, AKT1, APOC3, ATP5G2, ATP5I, ATPIF1, BNIP3, BPGM, CACNA1D, COA6, COQ7, COX20, COX5A, COX7A2L, COX7C, CPS1, CYC1, CYP21A2, DDIT4, DHTKD1, DLST, ECD, ENO1, G6PC, GNMT, HHEX, HIF1A, KHK, MDH1, MIA3, MSH2, MTFR2, NDUFA10, NDUFA4, NDUFA8, NDUFAB1, NDUFAF3, NDUFB5, NUBPL, OGDH, OXA1L, PDHB, PFKFB1, PFKL, PHKA2, PMPCB, PPP1R2, PTGES3, SLC25A25, SLC2A1, SLC2A2, SLC37A4, …
GO:0097193	intrinsic apoptotic signaling pathway	GO_BiologicalProcess-GOA_09.02.2016_16h18	1.6e-05	0.00022	[5, 6, 7]	13.7072	44	[ABL1, AKT1, BCL2L1, BNIP3, BRCA1, CDKN1A, CYLD, DAB2IP, DDIT4, DDX3X, DDX5, DFNA5, E2F1, EIF2AK3, EP300, ERO1A, HIF1A, HNRNPK, HSPH1, HYOU1, JAK2, LRRK2, MCL1, MIF, MLH1, MSH2, NFE2L2, NOL3, NUPR1, P4HB, PDK1, PIAS4, PLAGL2, PPP1R15A, RACK1, SEPT4, SERINC3, SFPQ, SOD2, TMEM161A, TOPORS, TRIB3, VDAC2, YWHAH]
GO:0007010	cytoskeleton organization	GO_BiologicalProcess-GOA_09.02.2016_16h18	1.7e-05	0.00023	[4]	10.2698	118	[ABL1, ADD1, AFAP1, ALMS1, ANLN, ARAP1, ARF1, ARHGEF11, ARHGEF28, ARPC3, ARRB1, ATAT1, AXIN1, BNIP2, BRAF, BRCA1, BUD31, CAPZB, CDC42BPA, CDC42EP1, CDK1, CEP192, CEP57, CFL2, CHD4, CHMP4B, CLIC4, COBLL1, CTSV, CUL7, CYLD, DBN1, DCTN6, DIAPH3, DLC1, DLG1, DMTN, DOCK7, DPYSL2, DSTN, DYNC1H1, ECT2, EDN1, EMP2, EPB41L2, EPHA1, EZR, FAM21C, FAT1, FGD4, FKBPL, GAN, GMFB, HAUS6, ID1, IKBKB, IQGAP2, JAK2…
GO:0008380	RNA splicing	GO_BiologicalProcess-GOA_09.02.2016_16h18	1.7e-05	0.00023	[6, 7, 8]	12.9442	51	[ACIN1, BUD31, CASC3, CDK12, CDK13, COQ7, CPSF1, CPSF7, DAZAP1, DDX5, DHX35, DHX38, DNAJC8, ESRP2, HNRNPH1, HNRNPK, IWS1, LSM1, LSM5, LUC7L3, MBNL1, NOL3, NUDT21, PABPC1, PPIL3, PPP2R1A, PRMT7, PSPC1, PTBP1, RBM10, RBM15, RBM25, SCAF1, SF3B3, SFPQ, SFSWAP, SNRPB, SON, SRRM2, SRSF3, SRSF4, SRSF7, SUPT6H, SYF2, TFIP11, THOC1, UHMK1, WDR83, YBX1, YTHDC1, ZCRB1]
GO:0010556	regulation of macromolecule biosynthetic process	GO_BiologicalProcess-GOA_09.02.2016_16h18	1.7e-05	0.00023	[4, 5]	8.52245	353	[ABCF1, ABL1, ADGRG3, ADNP, AFF1, AFF4, AKT1, ALPK3, ANKRD52, ANXA4, APOA2, APP, ARGLU1, ARHGAP35, ARHGEF11, ARID1B, ARNTL2, ARRB1, ASF1B, ASXL1, ASXL2, ATAD2, ATF7, ATN1, AURKAIP1, AXIN1, BACH1, BAG1, BAZ1A, BAZ1B, BMP4, BPTF, BRCA1, BRD2, BRIP1, BRMS1L, BUD31, C3orf33, C8orf4, CA9, CASC3, CASK, CBL, CBX5, CC2D1A, CCNA2, CCND1, CCT2, CD40, CDCA7, CDCA7L, CDK1, CDK12, CDK13, CDKN1A, CDT1, CEBPG, …
GO:0034248	regulation of cellular amide metabolic process	GO_BiologicalProcess-GOA_09.02.2016_16h18	1.7e-05	0.00023	[4, 5]	13.2231	48	[ABCF1, AKT1, APP, BPGM, CASC3, CNOT3, CNOT6L, CTIF, DDX3X, DTD1, EIF1, EIF1B, EIF2AK3, EIF2B2, EIF2B3, EIF2B4, EIF3B, EIF4B, EIF4E, EIF4G1, EIF4G2, EIF4H, EIF5A, EIF6, EPRS, GIGYF2, IARS, IARS2, NFE2L2, NSUN4, PABPC1, PIWIL2, POU5F1, PPP1R15A, PTAFR, RACK1, RAN, RPS5, RPS6KB1, SELT, SORL1, SRRT, TNRC6B, TSC1, UHMK1, UPF3A, UQCC2, YTHDF2]
GO:0010942	positive regulation of cell death	GO_BiologicalProcess-GOA_09.02.2016_16h18	1.7e-05	0.00023	[3, 4, 5]	11.4074	77	[ABL1, ACIN1, ADAMTSL4, AKT1, APH1A, ARHGEF11, ARRB1, ATPIF1, BAG1, BARD1, BCL2L1, BMP4, BNIP3, BRMS1L, BUD31, CD40, CDKN1A, CYLD, DAB2IP, DAP, DDIT4, DDX3X, DFNA5, DHODH, DLC1, DNAJA3, DUSP1, E2F1, ECT2, EIF2AK3, FGD4, GDNF, GPLD1, HIF1A, HMGCR, ID3, IGF2R, IKBKB, IP6K2, ITGA6, ITGB3BP, JAK2, KNG1, LRRK2, LYN, MCL1, NCOA1, NFKBID, NGEF, NGFRAP1, NQO1, NUPR1, OSGIN1, PAWR, PDCD4, PDCD6, PDIA3, PI…
GO:0043065	positive regulation of apoptotic process	GO_BiologicalProcess-GOA_09.02.2016_16h18	1.7e-05	0.00023	[5, 6, 7]	11.5689	73	[ABL1, ACIN1, ADAMTSL4, AKT1, APH1A, ARHGEF11, ARRB1, ATPIF1, BAG1, BARD1, BCL2L1, BMP4, BNIP3, BRMS1L, BUD31, CD40, CYLD, DAB2IP, DAP, DDX3X, DFNA5, DHODH, DLC1, DNAJA3, DUSP1, E2F1, ECT2, EIF2AK3, FGD4, GDNF, GPLD1, HIF1A, HMGCR, ID3, IGF2R, IP6K2, ITGA6, ITGB3BP, JAK2, KNG1, LYN, MCL1, NCOA1, NFKBID, NGEF, NGFRAP1, NQO1, NUPR1, OSGIN1, PAWR, PDCD4, PDCD6, PDIA3, PIAS4, PLAGL2, PNMA1, PPARG, PP…
GO:0051276	chromosome organization	GO_BiologicalProcess-GOA_09.02.2016_16h18	1.7e-05	0.00023	[4]	10.2609	118	[ACIN1, ACTB, ANAPC10, ARID1B, ARRB1, ASF1B, ASXL1, ASXL2, ATAD2, BAZ1A, BAZ1B, BPTF, BRCA1, BRD2, BRIP1, BRMS1L, CCNB1IP1, CCND1, CCT2, CDK1, CEP57, CHD4, CHD8, CHMP4B, CHRAC1, COPS2, CREBBP, CRTC2, DDB1, DDX3X, DKC1, DUSP1, EHMT1, EIF4E, EP300, ERCC2, FOXA2, GATAD2B, GDNF, GFI1, GINS1, HCFC1, HHEX, HIST1H2AC, HIST2H2BE, HMBOX1, HUWE1, ITGB3BP, IWS1, JADE2, JAK2, KAT6A, KDM4A, KDM7A, KMT2C, KMT2…
GO:0000375	RNA splicing, via transesterification reactions	GO_BiologicalProcess-GOA_09.02.2016_16h18	1.8e-05	0.00024	[7, 8, 9]	13.9932	41	[ACIN1, BUD31, CDK13, CPSF1, CPSF7, DAZAP1, DDX5, DHX35, DHX38, DNAJC8, HNRNPH1, HNRNPK, LSM1, LSM5, LUC7L3, MBNL1, NOL3, NUDT21, PABPC1, PPIL3, PRMT7, PSPC1, PTBP1, RBM10, RBM15, RBM25, SF3B3, SFPQ, SFSWAP, SNRPB, SRRM2, SRSF3, SRSF4, SRSF7, SYF2, TFIP11, UHMK1, WDR83, YBX1, YTHDC1, ZCRB1]
GO:0009725	response to hormone	GO_BiologicalProcess-GOA_09.02.2016_16h18	1.8e-05	0.00024	[3, 4]	10.2722	117	[ABCA3, ACADM, ACADS, ACSL1, AHSG, AKR1C1, AKR1C2, AKT1, AKT1S1, APOA2, APOC3, APRT, ATAT1, ATP1A1, ATP6V0E1, BMP4, BRAF, BRCA1, C3, CA9, CAB39, CCNA2, CCND1, CDKN1A, CPS1, CRY2, CSNK2B, CTSL, CTSV, CYC1, CYP21A2, DAB2IP, DUSP1, EDN1, EGR1, EIF2B2, EIF2B3, EIF2B4, EIF4B, EIF4E, EIF4G1, EP300, ERRFI1, FHL2, FOXO4, GNAI1, GNAI2, GOT1, GPLD1, HADH, HHEX, HIF1A, HNRNPK, HPN, IGFBP1, IL1RN, JAK2, KHK,…
GO:0009161	ribonucleoside monophosphate metabolic process	GO_BiologicalProcess-GOA_09.02.2016_16h18	2e-05	0.00026	[6, 7, 8]	13.9456	41	[ADSL, AK1, APOC3, APRT, ATP5G2, ATP5I, ATPIF1, BPGM, CASK, CMPK1, COA6, COQ7, COX5A, DDIT4, DHODH, DHTKD1, DLG1, ECD, ENO1, HIF1A, MIA3, MPP1, MPP2, MSH2, NDUFA10, NDUFA4, NDUFA8, NDUFAB1, NDUFB5, OGDH, PAICS, PFAS, PFKFB1, PFKL, PMPCB, SLC25A25, STAT3, STOML2, UCK2, UQCC2, UQCRC1]
GO:0006446	regulation of translational initiation	GO_BiologicalProcess-GOA_09.02.2016_16h18	2e-05	0.00026	[4, 6, 7, 8, 9]	21.1765	18	[CTIF, DDX3X, EIF1, EIF1B, EIF2AK3, EIF2B2, EIF2B3, EIF2B4, EIF3B, EIF4B, EIF4G1, EIF4G2, EIF4H, EIF6, PPP1R15A, RPS6KB1, UHMK1, YTHDF2]
GO:0034377	plasma lipoprotein particle assembly	GO_BiologicalProcess-GOA_09.02.2016_16h18	2e-05	0.00026	[3, 4, 6]	37.5	9	[ABCA1, ACSL3, APOA2, APOC1, APOC3, APOM, ARF1, MTTP, PLAGL2]
GO:0006401	RNA catabolic process	GO_BiologicalProcess-GOA_09.02.2016_16h18	2.1e-05	0.00027	[5, 6, 7]	14.5098	37	[CASC3, CNOT3, CNOT6L, CTIF, EIF4B, EIF4E, EIF4G1, EXOSC7, GSPT1, LSM1, LSM5, MLH1, PABPC1, PPP2R1A, RPL10, RPL13, RPL15, RPL18, RPL23A, RPL31, RPL34, RPL37A, RPL5, RPL7, RPS10, RPS11, RPS12, RPS15, RPS16, RPS21, RPS5, RPS8, SMG9, TNRC6B, UHMK1, UPF2, UPF3A]
GO:1901361	organic cyclic compound catabolic process	GO_BiologicalProcess-GOA_09.02.2016_16h18	2.1e-05	0.00027	[4]	12.0623	62	[AKR1D1, APOBEC3C, ATAT1, BLVRA, BLVRB, CASC3, CNOT3, CNOT6L, CTIF, DDIT4, DERA, DNPH1, DUT, ECD, EIF4B, EIF4E, EIF4G1, EXOSC7, GSPT1, GSTZ1, HIF1A, HSD17B11, KPNA1, LSM1, LSM5, MBD4, MIA3, MLH1, NEIL2, PABPC1, PDE7A, PPP2R1A, PRODH2, RACK1, RPL10, RPL13, RPL15, RPL18, RPL23A, RPL31, RPL34, RPL37A, RPL5, RPL7, RPS10, RPS11, RPS12, RPS15, RPS16, RPS21, RPS5, RPS8, SCARB1, SMG9, STAT3, SULT2A1, TNR…
GO:0001933	negative regulation of protein phosphorylation	GO_BiologicalProcess-GOA_09.02.2016_16h18	2.1e-05	0.00027	[6, 7, 8, 9]	12.8463	51	[ABL1, AKT1, AKT1S1, ARRB1, BAG1, BMP4, C3orf33, CAMK2N1, CDKN1A, DAB2IP, DDIT4, DKK1, DLG1, DMTN, DNAJA3, DUSP1, DUSP10, DUSP14, EPHA1, ERRFI1, EZR, GMFB, GPD1L, GPRC5A, HHEX, HMGCR, HSPH1, KLF4, LRRK2, LYN, PBK, PDCD4, PIBF1, PLPP3, PPP1R15A, PPP2R1A, PSEN1, RACK1, SOCS7, SORL1, SPINK1, SPRED2, SPRY1, STK38, TNFAIP3, TNIP1, TRAF3IP1, TRIB3, UBASH3B, UBE2C, ZGPAT]
GO:0032880	regulation of protein localization	GO_BiologicalProcess-GOA_09.02.2016_16h18	2.2e-05	0.00029	[3, 4]	10.4046	108	[ABAT, ABL1, ACSL3, AKT1, ANXA4, APOA2, ARF1, ARIH2, ARRB1, ASTN2, ATPIF1, AXIN1, BARD1, BCL2L1, BMP4, BRCA1, BTN2A2, C8orf4, CACNA1D, CCT2, CD40, CDK1, CDKN1A, CEP290, CLSTN3, CTSK, CYLD, DAB2IP, DDX58, DKC1, DLG1, DMTN, DNAJB2, E2F1, ECT2, EIF2AK3, EZR, FOXA2, GBF1, GNAI2, GOLPH3, GPD1L, GPLD1, HADH, HIF1A, HMGCR, HNRNPK, HSPH1, HUWE1, JAK2, KPNA1, LITAF, LRP4, LRRK2, LYN, LYPLA1, LYPLAL1, MBD4…
GO:2000112	regulation of cellular macromolecule biosynthetic process	GO_BiologicalProcess-GOA_09.02.2016_16h18	2.3e-05	0.00029	[5, 6]	8.52598	343	[ABCF1, ABL1, ADGRG3, ADNP, AFF1, AFF4, AKT1, ALPK3, ANKRD52, ANXA4, APP, ARGLU1, ARHGAP35, ARHGEF11, ARID1B, ARNTL2, ARRB1, ASF1B, ASXL1, ASXL2, ATAD2, ATF7, ATN1, AXIN1, BACH1, BAG1, BAZ1A, BAZ1B, BMP4, BPTF, BRCA1, BRD2, BRIP1, BRMS1L, BUD31, C3orf33, C8orf4, CA9, CASC3, CASK, CBL, CBX5, CC2D1A, CCNA2, CCND1, CCT2, CD40, CDCA7, CDCA7L, CDK1, CDK12, CDK13, CDKN1A, CDT1, CEBPG, CEP290, CHCHD2, C…
GO:0006417	regulation of translation	GO_BiologicalProcess-GOA_09.02.2016_16h18	2.3e-05	0.00029	[5, 6, 7, 8]	13.3929	45	[ABCF1, AKT1, APP, CASC3, CNOT3, CNOT6L, CTIF, DDX3X, DTD1, EIF1, EIF1B, EIF2AK3, EIF2B2, EIF2B3, EIF2B4, EIF3B, EIF4B, EIF4E, EIF4G1, EIF4G2, EIF4H, EIF5A, EIF6, EPRS, GIGYF2, IARS, IARS2, NSUN4, PABPC1, PIWIL2, POU5F1, PPP1R15A, PTAFR, RACK1, RAN, RPS5, RPS6KB1, SELT, SRRT, TNRC6B, TSC1, UHMK1, UPF3A, UQCC2, YTHDF2]
GO:0080135	regulation of cellular response to stress	GO_BiologicalProcess-GOA_09.02.2016_16h18	2.4e-05	0.00029	[3, 4, 5]	11.2554	78	[ABL1, AKT1, AKT1S1, AXIN1, BAG1, BCL2L1, BFAR, BNIP3, BRAF, BRCA1, CEBPG, CHCHD2, CHMP4B, CREBBP, CTSK, DAB2IP, DDX5, DLC1, DLG1, DNAJB1, DUSP10, EDN1, EIF2AK3, EP300, EZR, FEZ2, FKBPL, HIF1A, HMGCR, HNRNPK, HSPH1, HYOU1, KLF4, LRRK2, LYN, MAP1LC3B, MCL1, MGMT, MIF, NDEL1, NEK6, NFE2L2, NOL3, NPAS2, NUP107, NUP155, NUP210, NUP37, NUP58, P4HB, PBK, PDCD4, PIAS4, PIP4K2C, PLCB1, POLQ, POMT2, PPP1R…
GO:0050658	RNA transport	GO_BiologicalProcess-GOA_09.02.2016_16h18	2.3e-05	0.00029	[4, 5, 7]	16.3743	28	[ALKBH5, CASC3, CPSF1, DHX38, EIF4E, EIF5A, HHEX, IWS1, NPIPA1, NUP107, NUP155, NUP210, NUP37, NUP58, NXF1, RAN, SENP2, SLC6A4, SRSF3, SRSF4, SRSF7, SUPT6H, THOC1, TOMM20, TSC1, UPF2, UPF3A, XPO7]
GO:0050657	nucleic acid transport	GO_BiologicalProcess-GOA_09.02.2016_16h18	2.3e-05	0.00029	[6]	16.3743	28	[ALKBH5, CASC3, CPSF1, DHX38, EIF4E, EIF5A, HHEX, IWS1, NPIPA1, NUP107, NUP155, NUP210, NUP37, NUP58, NXF1, RAN, SENP2, SLC6A4, SRSF3, SRSF4, SRSF7, SUPT6H, THOC1, TOMM20, TSC1, UPF2, UPF3A, XPO7]
GO:0035383	thioester metabolic process	GO_BiologicalProcess-GOA_09.02.2016_16h18	2.4e-05	0.0003	[3, 4]	20.2128	19	[ACLY, ACOT11, ACSL1, ACSL3, ACSL4, ACSS1, DLST, ELOVL6, FAR1, MVD, MVK, OGDH, PDHB, PDK1, PIPOX, PPT1, SLC25A1, SUCLG2, THEM4]
GO:0006637	acyl-CoA metabolic process	GO_BiologicalProcess-GOA_09.02.2016_16h18	2.4e-05	0.0003	[4, 5]	20.2128	19	[ACLY, ACOT11, ACSL1, ACSL3, ACSL4, ACSS1, DLST, ELOVL6, FAR1, MVD, MVK, OGDH, PDHB, PDK1, PIPOX, PPT1, SLC25A1, SUCLG2, THEM4]
GO:0051028	mRNA transport	GO_BiologicalProcess-GOA_09.02.2016_16h18	2.5e-05	0.00031	[5, 6, 8]	17.2414	25	[ALKBH5, CASC3, CPSF1, DHX38, EIF4E, EIF5A, HHEX, IWS1, NPIPA1, NUP107, NUP155, NUP210, NUP37, NUP58, NXF1, SENP2, SLC6A4, SRSF3, SRSF4, SRSF7, SUPT6H, THOC1, UPF2, UPF3A, XPO7]
GO:0035556	intracellular signal transduction	GO_BiologicalProcess-GOA_09.02.2016_16h18	2.8e-05	0.00034	[4, 5]	8.86872	254	[ABCA1, ABL1, ACOT11, ACTB, ADGRG3, AKR1B10, AKR1C2, AKT1, AKT1S1, ANK2, APOC3, ARAP1, ARF1, ARFRP1, ARHGAP11A, ARHGAP35, ARHGEF11, ARHGEF28, ARL16, ARL4D, ARPC3, ARRB1, ASB2, AURKAIP1, AXIN1, AZI2, BAG1, BCL2L1, BMP4, BNIP2, BNIP3, BRAF, BRCA1, BUD31, C3, C3orf33, C8orf4, CAB39, CAPZB, CASP10, CBL, CC2D1A, CCDC6, CCL16, CCNA2, CD40, CDC42BPA, CDC42EP1, CDK1, CDK12, CDKN1A, CLSTN1, CNIH1, CREBBP,…
GO:0015980	energy derivation by oxidation of organic compounds	GO_BiologicalProcess-GOA_09.02.2016_16h18	2.9e-05	0.00035	[3, 4]	12.6214	52	[ACAD9, ACADM, ACLY, ADSL, AGPAT1, AKT1, ATP5G2, ATP5I, BNIP3, CACNA1D, COA6, COQ7, COX20, COX5A, COX7A2L, COX7C, CPS1, CYC1, CYP21A2, DHTKD1, DLST, G6PC, GNMT, HHEX, HIF1A, KHK, MDH1, MTFR2, NDUFA10, NDUFA4, NDUFA8, NDUFAB1, NDUFAF3, NDUFB5, NUBPL, OGDH, OXA1L, PDHB, PFKFB1, PHKA2, PMPCB, PPP1R2, PTGES3, SLC25A25, SLC2A1, SLC2A2, SLC37A4, SOD2, SUCLG2, UBC, UGP2, UQCRC1]
GO:0008219	cell death	GO_BiologicalProcess-GOA_09.02.2016_16h18	2.9e-05	0.00035	[3]	9.22285	197	[ABL1, ACIN1, ADAMTSL4, ADD1, ADNP, AKT1, AKT1S1, ANXA4, APH1A, APP, ARHGEF11, ARRB1, ATN1, ATPIF1, AXIN1, BAG1, BARD1, BCL2L1, BFAR, BMP4, BNIP2, BNIP3, BRAF, BRCA1, BRMS1L, BUD31, C3orf38, C8orf4, CASP10, CBL, CD40, CDCA7, CDK1, CDKN1A, CHD8, CHMP4B, CLIC4, CRLF1, CSE1L, CTSL, CTSV, CYLD, DAB2IP, DAP, DDB1, DDIT4, DDX3X, DDX5, DFNA5, DHODH, DIDO1, DLC1, DNAJA3, DUSP1, E2F1, ECT2, EDN1, EGR1, EI…
GO:0051246	regulation of protein metabolic process	GO_BiologicalProcess-GOA_09.02.2016_16h18	3e-05	0.00036	[4, 5]	8.90585	245	[ABCF1, ABL1, ACSL1, ADNP, AHSG, AKR1C1, AKT1, AKT1S1, ANAPC10, APOA2, APOM, APP, ARIH2, ARRB1, ARRDC3, ASXL2, ATPIF1, AURKAIP1, AXIN1, AZIN1, BAG1, BARD1, BMP4, BNIP2, BRAF, BRCA1, BRMS1L, BUD31, C3, C3orf33, CAB39, CAMK2N1, CASC3, CCDC6, CCL16, CCNA2, CCND1, CD40, CDC25A, CDK1, CDK12, CDKN1A, CEBPG, CEP192, CFI, CKS2, CLPX, CNOT3, CNOT6L, CRKL, CRLF1, CRY2, CSNK2B, CTIF, DAB2IP, DAP, DCUN1D2, D…
GO:0000377	RNA splicing, via transesterification reactions with bulged adenosine as nucleophile	GO_BiologicalProcess-GOA_09.02.2016_16h18	3e-05	0.00036	[8, 9, 10]	13.8408	40	[ACIN1, BUD31, CDK13, CPSF1, CPSF7, DAZAP1, DDX5, DHX35, DHX38, DNAJC8, HNRNPH1, HNRNPK, LSM5, LUC7L3, MBNL1, NOL3, NUDT21, PABPC1, PPIL3, PRMT7, PSPC1, PTBP1, RBM10, RBM15, RBM25, SF3B3, SFPQ, SFSWAP, SNRPB, SRRM2, SRSF3, SRSF4, SRSF7, SYF2, TFIP11, UHMK1, WDR83, YBX1, YTHDC1, ZCRB1]
GO:0000398	mRNA splicing, via spliceosome	GO_BiologicalProcess-GOA_09.02.2016_16h18	3e-05	0.00036	[7, 8, 9, 10, 11]	13.8408	40	[ACIN1, BUD31, CDK13, CPSF1, CPSF7, DAZAP1, DDX5, DHX35, DHX38, DNAJC8, HNRNPH1, HNRNPK, LSM5, LUC7L3, MBNL1, NOL3, NUDT21, PABPC1, PPIL3, PRMT7, PSPC1, PTBP1, RBM10, RBM15, RBM25, SF3B3, SFPQ, SFSWAP, SNRPB, SRRM2, SRSF3, SRSF4, SRSF7, SYF2, TFIP11, UHMK1, WDR83, YBX1, YTHDC1, ZCRB1]
GO:0045934	negative regulation of nucleobase-containing compound metabolic process	GO_BiologicalProcess-GOA_09.02.2016_16h18	3.1e-05	0.00037	[4, 5, 6]	9.74778	143	[ACIN1, ADGRG3, ANKRD52, ANXA4, APOC3, ARHGAP35, ARRB1, ASXL1, ASXL2, ATAD2, ATF7, ATN1, AXIN1, BACH1, BARD1, BMP4, BPTF, BRCA1, BRIP1, BRMS1L, BUD31, CBX5, CC2D1A, CCND1, CEBPG, CHD4, CHD8, COPS2, COQ7, CREBBP, CRY2, CYLD, DAB2IP, DAP, DDIT4, DDX5, DEPDC1, DKK1, DLG1, DNAJA3, DUSP1, E2F1, EDN1, EFNA1, EGR1, EHMT1, ENO1, ENPP7, EP300, EZR, FHL2, FOXA2, GATAD2B, GDNF, GFI1, GNAI2, GNAI3, HCFC1, HD…
GO:0023051	regulation of signaling	GO_BiologicalProcess-GOA_09.02.2016_16h18	3.1e-05	0.00037	[2, 3]	8.74645	277	[ABAT, ABCA1, ABL1, ADGRG3, ADNP, AFAP1, AGPAT1, AHSG, AKR1C2, AKT1, AKT1S1, ANK2, APOC3, APP, ARAP1, ARF1, ARHGAP11A, ARHGAP35, ARHGEF11, ARHGEF28, ARL4D, ARRB1, ARRDC3, ASXL1, ASXL2, ATP1A1, ATPIF1, AURKAIP1, AXIN1, BAZ1B, BCL2L1, BFAR, BMP4, BNIP2, BNIP3, BRAF, BRCA1, BUD31, C3, C3orf33, C8orf4, CACNA1D, CAPZB, CASP10, CBL, CC2D1A, CCDC6, CCL16, CCND1, CD40, CDK1, CDK12, CHD8, CLSTN1, CLSTN3, …
GO:0045444	fat cell differentiation	GO_BiologicalProcess-GOA_09.02.2016_16h18	3.2e-05	0.00038	[5]	14.9321	33	[AKT1, AP1S2, ARL4D, ASXL1, ASXL2, ATAT1, AXIN1, BNIP3, CCND1, DUSP10, E2F1, EIF2AK3, EP300, ERO1A, GDNF, HHEX, ITGA6, KLF4, MBD4, MED1, MEX3C, MMP11, NUCB2, PLAC8, PLCB1, PPARG, SDF4, SENP2, SOCS7, SOD2, SORT1, TAF8, TRIB3]
GO:0019432	triglyceride biosynthetic process	GO_BiologicalProcess-GOA_09.02.2016_16h18	3.3e-05	0.00039	[6, 7, 8]	20.4545	18	[ACLY, ACOT11, ACSL1, ACSL3, ACSL4, AGPAT1, APOC3, C3, CTDNEP1, ELOVL6, GPD1L, GPLD1, LPCAT1, MOGAT2, PPT1, SCARB1, SLC25A1, THEM4]
GO:0031400	negative regulation of protein modification process	GO_BiologicalProcess-GOA_09.02.2016_16h18	3.4e-05	0.00039	[5, 6, 7, 8]	11.2977	74	[ABL1, AKT1, AKT1S1, ANAPC10, ARRB1, BAG1, BMP4, BRCA1, C3orf33, CAMK2N1, CDKN1A, CEP192, CRY2, DAB2IP, DDIT4, DKK1, DLG1, DMTN, DNAJA3, DNAJB2, DUSP1, DUSP10, DUSP14, EPHA1, ERRFI1, EZR, GMFB, GPD1L, GPRC5A, HHEX, HMGCR, HPN, HSPH1, IKBKB, KDM4A, KLF4, LRRK2, LYN, MPP2, MYO1D, PBK, PDCD4, PIBF1, PLPP3, PPP1R15A, PPP2R1A, PSEN1, PSMA3, PSMA5, PSMA7, PSMB4, PSMC5, PSME3, PSMG2, RACK1, SENP2, SOCS7…
GO:0009991	response to extracellular stimulus	GO_BiologicalProcess-GOA_09.02.2016_16h18	3.6e-05	0.00041	[3]	11.545	68	[ABCA1, ABCG5, ACADM, ACADS, ACSL1, ACSL3, ACSL4, ADNP, ADSL, AKT1, APOC3, ASGR1, BNIP3, BRCA1, BRIP1, CCND1, CDKN1A, CHMP4B, CPS1, CTSK, CTSV, CYP21A2, DAP, DHODH, EIF2AK3, FEZ2, FOXA2, G6PC, GNAI2, HHEX, HIF1A, HMGCR, ITGA6, LRP11, LRRK2, LYN, MAP1LC3B, MAX, MBD4, MED1, MGMT, NCOA1, NFE2L2, NQO1, NUCB2, PAWR, PFKFB1, PIP4K2C, PPARG, PPP1R15A, PRDM4, QSOX1, RAB1B, RPS6KB1, SERPINC1, SLC16A1, SLC…
GO:0006886	intracellular protein transport	GO_BiologicalProcess-GOA_09.02.2016_16h18	3.7e-05	0.00043	[5, 6]	10.2421	110	[ACSL3, AKT1, ANK2, AP1G1, AP1S2, ARFRP1, ARIH2, ARL4D, ATPIF1, AURKAIP1, AXIN1, BARD1, BMP4, BRCA1, C8orf4, CDK1, CDKN1A, CEP290, CEP57, CHCHD2, CHMP4B, COPZ1, CRY2, CSE1L, CTSK, CYLD, DAB2IP, DDX58, DMTN, ECT2, EIF5A, GNPTAB, GOLPH3, HOMER3, HSPA4, HUWE1, JAK2, KPNA1, LITAF, LRRK2, LTBP3, LYPLA1, LYPLAL1, MBD4, MBTPS1, MED1, MIEF1, NAPB, NAPG, NCKIPSD, NDEL1, NFKBIB, NFKBIE, NOL3, NUP107, NUP15…
GO:0006913	nucleocytoplasmic transport	GO_BiologicalProcess-GOA_09.02.2016_16h18	3.8e-05	0.00044	[6]	12.2004	56	[AKT1, ALKBH5, AXIN1, BARD1, BMP4, BRCA1, C8orf4, CDK1, CDKN1A, CEP57, CPSF1, CRY2, CSE1L, CYLD, DAB2IP, DDX58, DHX38, ECT2, EIF4E, EIF5A, EIF6, HHEX, IWS1, JAK2, KPNA1, LITAF, MBD4, MBTPS1, MED1, NCKIPSD, NFKBIB, NFKBIE, NOL3, NUP107, NUP155, NUP58, NXF1, PDIA3, POU5F1, PPP3CA, RAN, RPL10, RPS15, SLC11A1, SLC6A4, SRSF3, SRSF4, SRSF7, STAT3, SUPT6H, THOC1, TSC1, UHMK1, UPF2, UPF3A, XPO7]
GO:0044843	cell cycle G1/S phase transition	GO_BiologicalProcess-GOA_09.02.2016_16h18	3.8e-05	0.00044	[5, 6]	13.9706	38	[AKT1, BACH1, BRIP1, C8orf4, CCND1, CDC25A, CDK1, CDKN1A, CDT1, CREBBP, DDX3X, E2F1, ECD, EIF4E, GFI1, GIGYF2, GSPT1, MCM10, MCM2, MCM7, PLCB1, PPP3CA, PRIM1, PRIM2, PSMA3, PSMA5, PSMA7, PSMB4, PSMC5, PSME3, RDX, RPS6KB1, RRM2, SENP2, STXBP4, TCF3, UBC, ZNF655]
GO:0044270	cellular nitrogen compound catabolic process	GO_BiologicalProcess-GOA_09.02.2016_16h18	3.9e-05	0.00044	[4]	12.1277	57	[APOBEC3C, BLVRA, BLVRB, CASC3, CNOT3, CNOT6L, CTIF, DDIT4, DERA, DMGDH, DNPH1, DUT, ECD, EIF4B, EIF4E, EIF4G1, EXOSC7, GSPT1, HIF1A, KPNA1, LSM1, LSM5, MBD4, MIA3, MLH1, MPST, NEIL2, PABPC1, PDE7A, PPP2R1A, RACK1, RPL10, RPL13, RPL15, RPL18, RPL23A, RPL31, RPL34, RPL37A, RPL5, RPL7, RPS10, RPS11, RPS12, RPS15, RPS16, RPS21, RPS5, RPS8, SMG9, STAT3, TNRC6B, UHMK1, UNG, UPF2, UPF3A, VDAC2]
GO:1903827	regulation of cellular protein localization	GO_BiologicalProcess-GOA_09.02.2016_16h18	4.2e-05	0.00047	[4, 5]	11.5318	67	[ACSL3, AKT1, ARIH2, ASTN2, ATPIF1, AXIN1, BARD1, BCL2L1, BMP4, BRCA1, C8orf4, CCT2, CDK1, CDKN1A, CEP290, CTSK, CYLD, DAB2IP, DDX58, DKC1, DLG1, DMTN, E2F1, ECT2, EIF2AK3, EZR, GBF1, GPD1L, HNRNPK, HSPH1, HUWE1, JAK2, KPNA1, LITAF, LRP4, LRRK2, LYPLA1, LYPLAL1, MBD4, MBTPS1, MED1, MIEF1, NDEL1, NEDD4L, NFKBIB, NFKBIE, NOL3, NUMB, NUP58, PLAGL2, POU5F1, PPP3CA, PRKCI, PTGES2, RAB29, RACK1, RDX, R…
GO:0006605	protein targeting	GO_BiologicalProcess-GOA_09.02.2016_16h18	4.3e-05	0.00047	[5, 6, 7]	10.9608	81	[AKT1, ANK2, ARIH2, ARL4D, ATPIF1, AURKAIP1, AXIN1, BMP4, BRCA1, C8orf4, CDK1, CDKN1A, CEP57, CHCHD2, CHMP4B, CRY2, CSE1L, CTSK, CYLD, DAB2IP, DDX58, DMTN, ECT2, GNPTAB, HOMER3, HSPA4, HUWE1, JAK2, KPNA1, LITAF, LRRK2, LTBP3, MBD4, MBTPS1, MED1, MIEF1, NCKIPSD, NFKBIB, NFKBIE, NOL3, NUP107, NUP155, NUP58, PDIA3, PEX10, PLAGL2, PMPCB, POU5F1, PPP3CA, PRKCI, RAN, RPL10, RPL13, RPL15, RPL18, RPL23A,…
GO:0031327	negative regulation of cellular biosynthetic process	GO_BiologicalProcess-GOA_09.02.2016_16h18	4.2e-05	0.00047	[4, 5, 6]	9.60307	150	[ADGRG3, ANKRD52, ANXA4, APOC1, APOC3, ARHGAP35, ARRB1, ASXL1, ASXL2, ATAD2, ATF7, ATN1, ATP1A1, AXIN1, BACH1, BMP4, BPTF, BRCA1, BRIP1, BRMS1L, BUD31, CBX5, CC2D1A, CCND1, CEBPG, CHD4, CHD8, CNOT3, CNOT6L, COPS2, COQ7, CREBBP, CRY2, CYLD, DAB2IP, DAP, DDX3X, DDX5, DEPDC1, DKK1, DLG1, DNAJA3, DUSP1, E2F1, EDN1, EFNA1, EGR1, EHMT1, EIF2AK3, EIF2B3, EIF2B4, EIF4E, ENO1, ENPP7, EP300, EPRS, ERLIN1, …
GO:0010648	negative regulation of cell communication	GO_BiologicalProcess-GOA_09.02.2016_16h18	4.2e-05	0.00047	[3, 4, 5]	9.88506	129	[ABL1, ADGRG3, ADNP, AHSG, AKT1, AKT1S1, ARF1, ARHGAP35, ARRB1, ASXL1, AXIN1, BCL2L1, BFAR, BMP4, BRAF, BRCA1, C3orf33, C8orf4, CBL, CCND1, CHD8, CHMP4B, CRY2, CTHRC1, CYLD, DAB2IP, DDIT4, DDX3X, DKK1, DLC1, DLG1, DNAJA3, DUSP1, DUSP10, DUSP14, EDN1, EGR1, ERRFI1, EZR, FEZ2, GDNF, GNAI1, GNAI2, GPC3, GPD1L, GPRC5A, GSTO1, HADH, HHEX, HIF1A, HMGCR, HMGXB4, HSPH1, HYOU1, IGFBP1, IGFBP6, IL1RN, ITGA…
GO:0051236	establishment of RNA localization	GO_BiologicalProcess-GOA_09.02.2016_16h18	4.4e-05	0.00048	[3, 4]	15.8192	28	[ALKBH5, CASC3, CPSF1, DHX38, EIF4E, EIF5A, HHEX, IWS1, NPIPA1, NUP107, NUP155, NUP210, NUP37, NUP58, NXF1, RAN, SENP2, SLC6A4, SRSF3, SRSF4, SRSF7, SUPT6H, THOC1, TOMM20, TSC1, UPF2, UPF3A, XPO7]
GO:0071466	cellular response to xenobiotic stimulus	GO_BiologicalProcess-GOA_09.02.2016_16h18	4.3e-05	0.00048	[4]	15.122	31	[ACSL1, ACSS1, ADH4, ADH5, AKR1C1, AKR7A2, AOC3, AURKAIP1, BPHL, CYP19A1, CYP21A2, CYP4F12, CYP4F2, E2F1, EIF4G2, ESD, GGT1, GSTA1, GSTM4, GSTO1, GSTZ1, MAT1A, MCM7, MGST2, MTR, NCEH1, NQO1, NR1I2, PAPSS2, SULT2A1, UGP2]
GO:0009066	aspartate family amino acid metabolic process	GO_BiologicalProcess-GOA_09.02.2016_16h18	4.4e-05	0.00049	[5, 6, 8, 9]	23.7288	14	[ADI1, ALDH7A1, DLST, EIF2B2, EIF2B4, ENOPH1, GCAT, GNMT, GOT1, MTHFD1, MTR, NIT2, OGDH, PIPOX]
GO:0046460	neutral lipid biosynthetic process	GO_BiologicalProcess-GOA_09.02.2016_16h18	4.6e-05	0.00049	[4, 5, 6]	20	18	[ACLY, ACOT11, ACSL1, ACSL3, ACSL4, AGPAT1, APOC3, C3, CTDNEP1, ELOVL6, GPD1L, GPLD1, LPCAT1, MOGAT2, PPT1, SCARB1, SLC25A1, THEM4]
GO:0046463	acylglycerol biosynthetic process	GO_BiologicalProcess-GOA_09.02.2016_16h18	4.6e-05	0.00049	[5, 6, 7]	20	18	[ACLY, ACOT11, ACSL1, ACSL3, ACSL4, AGPAT1, APOC3, C3, CTDNEP1, ELOVL6, GPD1L, GPLD1, LPCAT1, MOGAT2, PPT1, SCARB1, SLC25A1, THEM4]
GO:0006732	coenzyme metabolic process	GO_BiologicalProcess-GOA_09.02.2016_16h18	4.5e-05	0.00049	[4]	13.1343	44	[ACLY, ACOT11, ACSL1, ACSL3, ACSL4, ACSS1, ATPIF1, BPGM, COQ7, CYP4F2, DDIT4, DERA, DHTKD1, DLST, ECD, ELOVL6, ENO1, FAR1, GNMT, GPD1L, HIF1A, HMGCR, MAT1A, MDH1, ME2, MIA3, MTHFD1, MVD, MVK, NAMPT, OGDH, PANK1, PDHB, PDK1, PFKFB1, PFKL, PGD, PIPOX, PPT1, RPE, SLC25A1, STAT3, SUCLG2, THEM4]
GO:0016259	selenocysteine metabolic process	GO_BiologicalProcess-GOA_09.02.2016_16h18	4.5e-05	0.00049	[4, 5, 6, 7, 9, 10]	19.3878	19	[RPL10, RPL13, RPL15, RPL18, RPL23A, RPL31, RPL34, RPL37A, RPL5, RPL7, RPS10, RPS11, RPS12, RPS15, RPS16, RPS21, RPS5, RPS8, SEPHS2]
GO:2000113	negative regulation of cellular macromolecule biosynthetic process	GO_BiologicalProcess-GOA_09.02.2016_16h18	4.6e-05	0.00049	[5, 6, 7]	9.75089	137	[ADGRG3, ANKRD52, ANXA4, ARHGAP35, ARRB1, ASXL1, ASXL2, ATAD2, ATF7, ATN1, AXIN1, BACH1, BMP4, BPTF, BRCA1, BRIP1, BRMS1L, CBX5, CC2D1A, CCND1, CEBPG, CHD4, CHD8, CNOT3, CNOT6L, COPS2, COQ7, CREBBP, CRY2, CYLD, DAB2IP, DAP, DDX3X, DDX5, DEPDC1, DKK1, DLG1, DNAJA3, DUSP1, E2F1, EDN1, EFNA1, EGR1, EHMT1, EIF2AK3, EIF2B3, EIF2B4, EIF4E, ENO1, ENPP7, EP300, EPRS, EZR, FHL2, FOXA2, GATAD2B, GDNF, GFI1…
GO:0009966	regulation of signal transduction	GO_BiologicalProcess-GOA_09.02.2016_16h18	4.5e-05	0.00049	[3, 4, 5]	8.8467	247	[ABAT, ABCA1, ABL1, ADGRG3, AFAP1, AGPAT1, AHSG, AKR1C2, AKT1, AKT1S1, APOC3, APP, ARAP1, ARHGAP11A, ARHGAP35, ARHGEF11, ARHGEF28, ARL4D, ARRB1, ARRDC3, ASXL1, ASXL2, ATPIF1, AURKAIP1, AXIN1, BAZ1B, BCL2L1, BFAR, BMP4, BNIP2, BNIP3, BRAF, BRCA1, BUD31, C3, C3orf33, C8orf4, CAPZB, CASP10, CBL, CC2D1A, CCDC6, CCL16, CCND1, CD40, CDK1, CDK12, CHD8, CREBBP, CRKL, CRLF1, CRY2, CSNK1G2, CSNK2B, CTDNEP1…
GO:0009890	negative regulation of biosynthetic process	GO_BiologicalProcess-GOA_09.02.2016_16h18	4.7e-05	0.0005	[3, 4, 5]	9.55975	152	[ADGRG3, ANKRD52, ANXA4, APOC1, APOC3, ARHGAP35, ARRB1, ASXL1, ASXL2, ATAD2, ATF7, ATN1, ATP1A1, AXIN1, BACH1, BMP4, BPTF, BRCA1, BRIP1, BRMS1L, BUD31, CBX5, CC2D1A, CCND1, CEBPG, CHD4, CHD8, CNOT3, CNOT6L, COPS2, COQ7, CREBBP, CRY2, CYGB, CYLD, DAB2IP, DAP, DDX3X, DDX5, DEPDC1, DKK1, DLG1, DNAJA3, DUSP1, E2F1, EDN1, EFNA1, EGR1, EHMT1, EIF2AK3, EIF2B3, EIF2B4, EIF4E, ENO1, ENPP7, EP300, EPRS, ER…
GO:0009117	nucleotide metabolic process	GO_BiologicalProcess-GOA_09.02.2016_16h18	4.8e-05	0.00051	[5, 6, 7]	11.0632	77	[ABCA1, ADNP, ADSL, AK1, APOC3, APRT, ATP5G2, ATP5I, ATPIF1, BPGM, BUD31, CASK, CEP290, CMPK1, COA6, COQ7, COX5A, DCK, DDIT4, DERA, DHODH, DHTKD1, DLG1, DLST, DNPH1, DUT, ECD, EDN1, ENO1, ERH, GNAI2, GNAI3, GPD1L, HIF1A, HMGCR, KARS, LRRK2, MBD4, MDH1, ME2, MIA3, MPP1, MPP2, MSH2, MTHFD1, NAMPT, NDUFA10, NDUFA4, NDUFA8, NDUFAB1, NDUFB5, NEIL2, NUCB2, OAS1, OGDH, PAICS, PANK1, PAPSS2, PDE7A, PDHB,…
GO:0045333	cellular respiration	GO_BiologicalProcess-GOA_09.02.2016_16h18	4.9e-05	0.00052	[4, 5]	14.8148	32	[ACAD9, ADSL, ATP5G2, ATP5I, BNIP3, COA6, COQ7, COX20, COX5A, COX7A2L, COX7C, CYC1, DHTKD1, DLST, HIF1A, MDH1, MTFR2, NDUFA10, NDUFA4, NDUFA8, NDUFAB1, NDUFAF3, NDUFB5, NUBPL, OGDH, OXA1L, PDHB, PMPCB, SLC25A25, SOD2, SUCLG2, UQCRC1]
GO:0051169	nuclear transport	GO_BiologicalProcess-GOA_09.02.2016_16h18	5.2e-05	0.00055	[5]	12.069	56	[AKT1, ALKBH5, AXIN1, BARD1, BMP4, BRCA1, C8orf4, CDK1, CDKN1A, CEP57, CPSF1, CRY2, CSE1L, CYLD, DAB2IP, DDX58, DHX38, ECT2, EIF4E, EIF5A, EIF6, HHEX, IWS1, JAK2, KPNA1, LITAF, MBD4, MBTPS1, MED1, NCKIPSD, NFKBIB, NFKBIE, NOL3, NUP107, NUP155, NUP58, NXF1, PDIA3, POU5F1, PPP3CA, RAN, RPL10, RPS15, SLC11A1, SLC6A4, SRSF3, SRSF4, SRSF7, STAT3, SUPT6H, THOC1, TSC1, UHMK1, UPF2, UPF3A, XPO7]
GO:0051301	cell division	GO_BiologicalProcess-GOA_09.02.2016_16h18	5.2e-05	0.00055	[3]	11.0014	78	[AKT1, ANAPC10, ANLN, ARHGEF11, AURKAIP1, BCL2L1, BMP4, CABLES1, CCNA2, CCND1, CDC25A, CDCA7, CDCA7L, CDK1, CDK13, CDKN1A, CHMP4B, CKS2, CUL7, DAB2IP, DOCK7, DUSP1, ECT2, EDN1, ERCC2, GIT1, GNAI1, GNAI2, GNAI3, HAUS6, ITGB3BP, KIF23, KLHL42, LIG1, MAPRE2, MCM2, MSH2, MYH10, NCAPG, NEDD9, NEK6, NUMA1, NUMB, NUP37, NUSAP1, PDS5B, PIWIL2, PLCB1, POU5F1, PSMG2, RAB11A, RAB11FIP4, RAB35, RACK1, RAN, R…
GO:0055086	nucleobase-containing small molecule metabolic process	GO_BiologicalProcess-GOA_09.02.2016_16h18	5.4e-05	0.00056	[3, 4, 5]	10.8214	83	[ABCA1, ADNP, ADSL, AK1, APOBEC3C, APOC3, APRT, ATP5G2, ATP5I, ATPIF1, BPGM, BUD31, CASK, CEP290, CMPK1, COA6, COQ7, COX5A, CPS1, CYP21A2, DCK, DDIT4, DERA, DHODH, DHTKD1, DLG1, DLST, DNPH1, DUT, ECD, EDN1, ENO1, ERH, GNAI2, GNAI3, GNMT, GPD1L, HIF1A, HMGCR, KARS, LRRK2, MAT1A, MBD4, MDH1, ME2, MIA3, MPP1, MPP2, MSH2, MTHFD1, NAMPT, NDUFA10, NDUFA4, NDUFA8, NDUFAB1, NDUFB5, NEIL2, NUCB2, OAS1, OG…
GO:0043086	negative regulation of catalytic activity	GO_BiologicalProcess-GOA_09.02.2016_16h18	5.4e-05	0.00056	[3, 4, 5]	10.4575	96	[ABL1, AHSG, AKT1, AKT1S1, ANAPC10, ANXA4, APOA2, APOC1, APOC3, APP, ARRB1, ATPIF1, AURKAIP1, BMP4, C3, CAMK2N1, CDKN1A, CEP192, COPS2, CRY2, DAB2IP, DDX3X, DLC1, DNAJA3, DUSP1, DUSP10, DUSP14, EPHA1, ERRFI1, FOXA2, GFI1, GMFB, GNAI2, GNAI3, GPC3, GPRC5A, HHEX, HMGCR, HPN, IKBKB, IQGAP2, ITIH5, KLF4, KNG1, LRRK2, LYN, MPP2, MYO1D, NFKB1, NOL3, NQO1, OXA1L, PDCD4, PPARG, PPP1R15A, PPP1R2, PPP2R1A,…
GO:0045892	negative regulation of transcription, DNA-templated	GO_BiologicalProcess-GOA_09.02.2016_16h18	5.7e-05	0.00059	[5, 6, 7, 8, 9, 10, 11]	9.94248	121	[ADGRG3, ANKRD52, ANXA4, ARHGAP35, ARRB1, ASXL1, ASXL2, ATAD2, ATF7, ATN1, AXIN1, BACH1, BMP4, BPTF, BRCA1, BRIP1, BRMS1L, CBX5, CC2D1A, CCND1, CEBPG, CHD4, CHD8, COPS2, COQ7, CREBBP, CRY2, CYLD, DAB2IP, DAP, DDX5, DEPDC1, DKK1, DLG1, DNAJA3, E2F1, EDN1, EFNA1, EGR1, EHMT1, ENO1, EP300, EZR, FHL2, FOXA2, GATAD2B, GDNF, GFI1, HCFC1, HDGF, HHEX, HIF1A, HIST1H2AC, HIVEP1, HMBOX1, HNRNPK, ID1, ID3, I…
GO:0034655	nucleobase-containing compound catabolic process	GO_BiologicalProcess-GOA_09.02.2016_16h18	5.9e-05	0.0006	[4, 5]	12.2931	52	[APOBEC3C, CASC3, CNOT3, CNOT6L, CTIF, DDIT4, DERA, DNPH1, DUT, ECD, EIF4B, EIF4E, EIF4G1, EXOSC7, GSPT1, HIF1A, KPNA1, LSM1, LSM5, MBD4, MIA3, MLH1, NEIL2, PABPC1, PDE7A, PPP2R1A, RACK1, RPL10, RPL13, RPL15, RPL18, RPL23A, RPL31, RPL34, RPL37A, RPL5, RPL7, RPS10, RPS11, RPS12, RPS15, RPS16, RPS21, RPS5, RPS8, SMG9, STAT3, TNRC6B, UHMK1, UNG, UPF2, UPF3A]
GO:0009119	ribonucleoside metabolic process	GO_BiologicalProcess-GOA_09.02.2016_16h18	5.9e-05	0.0006	[5, 6, 7]	12.532	49	[ADSL, AK1, APOBEC3C, APOC3, APRT, ATP5G2, ATP5I, ATPIF1, BPGM, CASK, CMPK1, COA6, COQ7, COX5A, DDIT4, DHODH, DHTKD1, DLG1, ECD, ENO1, GNAI3, GNMT, HIF1A, HMGCR, LRRK2, MAT1A, MIA3, MPP1, MPP2, MSH2, NDUFA10, NDUFA4, NDUFA8, NDUFAB1, NDUFB5, OGDH, PANK1, PAPSS2, PFKFB1, PFKL, PMPCB, QTRT1, SLC25A25, STAT3, STOML2, SULT2A1, UCK2, UQCC2, UQCRC1]
GO:0042981	regulation of apoptotic process	GO_BiologicalProcess-GOA_09.02.2016_16h18	5.9e-05	0.0006	[5, 6]	9.55128	149	[ABL1, ACIN1, ADAMTSL4, ADNP, AKT1, AKT1S1, ANXA4, APH1A, ARHGEF11, ARRB1, ATPIF1, BAG1, BARD1, BCL2L1, BFAR, BMP4, BNIP2, BNIP3, BRAF, BRCA1, BRMS1L, BUD31, CASP10, CBL, CD40, CDK1, CDKN1A, CHD8, CRLF1, CYLD, DAB2IP, DAP, DDB1, DDX3X, DFNA5, DHODH, DLC1, DNAJA3, DUSP1, E2F1, ECT2, EDN1, EGR1, EIF2AK3, FGD4, FHL2, GDF11, GDF15, GDNF, GLO1, GOLPH3, GPLD1, HIF1A, HMGCR, HNRNPK, HPN, HSPH1, HYOU1, I…
GO:0065005	protein-lipid complex assembly	GO_BiologicalProcess-GOA_09.02.2016_16h18	6e-05	0.00061	[5]	33.3333	9	[ABCA1, ACSL3, APOA2, APOC1, APOC3, APOM, ARF1, MTTP, PLAGL2]
GO:0007017	microtubule-based process	GO_BiologicalProcess-GOA_09.02.2016_16h18	6.5e-05	0.00065	[3]	11.1987	71	[ABL1, APP, ATAT1, AXIN1, BLOC1S6, BNIP2, BRCA1, CAPZB, CDC42BPA, CDK1, CEP192, CEP57, CHD4, CHMP4B, CUL7, CYLD, DCTN6, DLG1, DNHD1, DOCK7, DYNC1H1, ECT2, EZR, FKBPL, HAUS6, HIF1A, KIAA0101, KIF1C, KIF23, KIF24, KIF3A, KIF3C, KIF5A, KIFC3, KLHL42, LAMP1, MAP1B, MAP7D1, MAPRE2, MLH1, NDEL1, NEK6, NUMA1, NUSAP1, PIBF1, PPP2R1A, RAB11A, RAN, SKA1, SLC16A1, SLC6A4, SON, SPDL1, SPRY1, STIL, STMN1, SUN…
GO:0051248	negative regulation of protein metabolic process	GO_BiologicalProcess-GOA_09.02.2016_16h18	6.6e-05	0.00066	[4, 5, 6]	9.99139	116	[ABL1, AHSG, AKT1, AKT1S1, ANAPC10, APOM, APP, ARRB1, AXIN1, AZIN1, BAG1, BMP4, BRCA1, C3, C3orf33, CAMK2N1, CDKN1A, CEP192, CNOT3, CNOT6L, CRY2, DAB2IP, DDIT4, DDX3X, DKK1, DLG1, DMTN, DNAJA3, DNAJB2, DUSP1, DUSP10, DUSP14, EDN1, EIF2AK3, EIF2B3, EIF2B4, EIF4E, EPHA1, EPRS, ERRFI1, EZR, GIGYF2, GMFB, GPC3, GPD1L, GPRC5A, HHEX, HMGCR, HPN, HSPH1, IKBKB, ITGAV, ITIH5, KDM4A, KLF4, KNG1, LAG3, LRRK…
GO:0006753	nucleoside phosphate metabolic process	GO_BiologicalProcess-GOA_09.02.2016_16h18	6.7e-05	0.00067	[4, 5, 6]	10.9531	77	[ABCA1, ADNP, ADSL, AK1, APOC3, APRT, ATP5G2, ATP5I, ATPIF1, BPGM, BUD31, CASK, CEP290, CMPK1, COA6, COQ7, COX5A, DCK, DDIT4, DERA, DHODH, DHTKD1, DLG1, DLST, DNPH1, DUT, ECD, EDN1, ENO1, ERH, GNAI2, GNAI3, GPD1L, HIF1A, HMGCR, KARS, LRRK2, MBD4, MDH1, ME2, MIA3, MPP1, MPP2, MSH2, MTHFD1, NAMPT, NDUFA10, NDUFA4, NDUFA8, NDUFAB1, NDUFB5, NEIL2, NUCB2, OAS1, OGDH, PAICS, PANK1, PAPSS2, PDE7A, PDHB,…
GO:0051253	negative regulation of RNA metabolic process	GO_BiologicalProcess-GOA_09.02.2016_16h18	6.8e-05	0.00067	[4, 5, 6, 7, 8]	9.78014	129	[ACIN1, ADGRG3, ANKRD52, ANXA4, ARHGAP35, ARRB1, ASXL1, ASXL2, ATAD2, ATF7, ATN1, AXIN1, BACH1, BARD1, BMP4, BPTF, BRCA1, BRIP1, BRMS1L, CBX5, CC2D1A, CCND1, CEBPG, CHD4, CHD8, COPS2, COQ7, CREBBP, CRY2, CYLD, DAB2IP, DAP, DDX5, DEPDC1, DKK1, DLG1, DNAJA3, E2F1, EDN1, EFNA1, EGR1, EHMT1, ENO1, EP300, EZR, FHL2, FOXA2, GATAD2B, GDNF, GFI1, HCFC1, HDGF, HHEX, HIF1A, HIST1H2AC, HIVEP1, HMBOX1, HNRNP…
GO:0006555	methionine metabolic process	GO_BiologicalProcess-GOA_09.02.2016_16h18	7.6e-05	0.00075	[5, 6, 7, 8, 9, 10]	36.3636	8	[ADI1, EIF2B2, EIF2B4, ENOPH1, GNMT, GOT1, MTHFD1, MTR]
GO:0009167	purine ribonucleoside monophosphate metabolic process	GO_BiologicalProcess-GOA_09.02.2016_16h18	7.9e-05	0.00078	[7, 8, 9]	13.5231	38	[ADSL, AK1, APOC3, APRT, ATP5G2, ATP5I, ATPIF1, BPGM, CASK, COA6, COQ7, COX5A, DDIT4, DHTKD1, DLG1, ECD, ENO1, HIF1A, MIA3, MPP1, MPP2, MSH2, NDUFA10, NDUFA4, NDUFA8, NDUFAB1, NDUFB5, OGDH, PAICS, PFAS, PFKFB1, PFKL, PMPCB, SLC25A25, STAT3, STOML2, UQCC2, UQCRC1]
GO:0097190	apoptotic signaling pathway	GO_BiologicalProcess-GOA_09.02.2016_16h18	7.9e-05	0.00078	[4, 5, 6]	10.9353	76	[ABL1, AKT1, APH1A, ARHGEF11, ATPIF1, BCL2L1, BNIP3, BRCA1, CASP10, CD40, CDKN1A, CYLD, DAB2IP, DAP, DDIT4, DDX3X, DDX5, DFNA5, DIDO1, E2F1, ECT2, EIF2AK3, EP300, ERO1A, FGD4, GDNF, HIF1A, HNRNPK, HSPH1, HYOU1, ITGA6, ITGAV, ITGB3BP, JAK2, LAMP1, LRRK2, MCL1, MIF, MLH1, MSH2, NFE2L2, NGEF, NGFRAP1, NOL3, NRP1, NUPR1, P4HB, PAWR, PDCD6, PDIA3, PDK1, PIAS4, PLAGL2, PPP1R15A, PPP2R1A, PSEN1, PSME3, …
GO:0031667	response to nutrient levels	GO_BiologicalProcess-GOA_09.02.2016_16h18	8.2e-05	0.00079	[4]	11.4286	64	[ABCA1, ABCG5, ACADM, ACADS, ACSL1, ACSL3, ACSL4, ADSL, AKT1, APOC3, BNIP3, BRCA1, BRIP1, CCND1, CDKN1A, CHMP4B, CPS1, CTSK, CTSV, CYP21A2, DAP, DHODH, EIF2AK3, FEZ2, FOXA2, G6PC, GNAI2, HHEX, HIF1A, HMGCR, LRP11, LRRK2, MAP1LC3B, MAX, MBD4, MED1, MGMT, NCOA1, NFE2L2, NQO1, NUCB2, PAWR, PFKFB1, PIP4K2C, PPARG, PPP1R15A, PRDM4, QSOX1, RAB1B, RPS6KB1, SERPINC1, SLC16A1, SLC25A25, SLC2A1, SLC37A4, S…
GO:0009410	response to xenobiotic stimulus	GO_BiologicalProcess-GOA_09.02.2016_16h18	8.3e-05	0.0008	[3]	14.6226	31	[ACSL1, ACSS1, ADH4, ADH5, AKR1C1, AKR7A2, AOC3, AURKAIP1, BPHL, CYP19A1, CYP21A2, CYP4F12, CYP4F2, E2F1, EIF4G2, ESD, GGT1, GSTA1, GSTM4, GSTO1, GSTZ1, MAT1A, MCM7, MGST2, MTR, NCEH1, NQO1, NR1I2, PAPSS2, SULT2A1, UGP2]
GO:0010564	regulation of cell cycle process	GO_BiologicalProcess-GOA_09.02.2016_16h18	8.3e-05	0.00081	[4, 5]	11.2795	67	[AKT1, ANAPC10, ANLN, APP, AURKAIP1, BMP4, BRCA1, C8orf4, CCNA2, CCND1, CDK1, CDK13, CDKN1A, CDT1, CHMP4B, CREBBP, CUL7, DAB2IP, DDB1, DDX3X, DUSP1, E2F1, ECD, ECT2, EDN1, ERCC2, FANCI, FOXO4, GIGYF2, GIT1, KIF23, MBD4, MCM2, MED1, MIF, MSH2, NEK6, NUSAP1, PIWIL2, PLCB1, PPP2R1A, PSMA3, PSMA5, PSMA7, PSMB4, PSMC5, PSME3, PSMG2, RAB11A, RAD51B, RDX, SENP2, SFPQ, SOX9, SSTR5, STIL, STXBP4, SYF2, TC…
GO:0009126	purine nucleoside monophosphate metabolic process	GO_BiologicalProcess-GOA_09.02.2016_16h18	8.5e-05	0.00082	[6, 7, 8]	13.4752	38	[ADSL, AK1, APOC3, APRT, ATP5G2, ATP5I, ATPIF1, BPGM, CASK, COA6, COQ7, COX5A, DDIT4, DHTKD1, DLG1, ECD, ENO1, HIF1A, MIA3, MPP1, MPP2, MSH2, NDUFA10, NDUFA4, NDUFA8, NDUFAB1, NDUFB5, OGDH, PAICS, PFAS, PFKFB1, PFKL, PMPCB, SLC25A25, STAT3, STOML2, UQCC2, UQCRC1]
GO:0097659	nucleic acid-templated transcription	GO_BiologicalProcess-GOA_09.02.2016_16h18	8.5e-05	0.00082	[6, 7, 8]	8.45254	325	[ABL1, ADGRG3, ADNP, AFF1, AFF4, AKT1, ALPK3, ANKRD52, ANXA4, APP, ARGLU1, ARHGAP35, ARHGEF11, ARID1B, ARNTL2, ARRB1, ASF1B, ASXL1, ASXL2, ATAD2, ATF7, ATN1, AURKAIP1, AXIN1, BACH1, BAG1, BAZ1A, BAZ1B, BMP4, BPTF, BRCA1, BRD2, BRIP1, BRMS1L, BUD31, C3orf33, C8orf4, CA9, CASK, CBL, CBX5, CC2D1A, CCNA2, CCND1, CD40, CDCA7, CDCA7L, CDK1, CDK12, CDK13, CDT1, CEBPG, CEP290, CHCHD2, CHD4, CHD8, CNOT3, …
GO:0051603	proteolysis involved in cellular protein catabolic process	GO_BiologicalProcess-GOA_09.02.2016_16h18	8.5e-05	0.00082	[5, 6, 7]	11.0599	72	[AKT1, ANAPC10, ARIH2, ARRB1, ASB2, ATPIF1, AXIN1, BFAR, CBL, CCDC47, CDK1, CHMP4B, CLPX, CPVL, CTSK, CTSL, CTSV, CUL7, CYLD, DAB2IP, DDB1, DDRGK1, DNAJB2, DTL, DUSP1, ERLIN1, GAN, HECTD4, HUWE1, KLHL42, LRRK2, MVB12B, NEDD4L, NFE2L2, PBK, PSEN1, PSMA3, PSMA5, PSMA7, PSMB4, PSMC5, PSME3, PSMG2, RACK1, RAD23B, RBBP6, RNF11, RNF6, RNF7, RNF8, SIAH2, TINAGL1, TNFAIP1, TNFAIP3, TOPORS, TRIB3, TRIM25,…
GO:0019058	viral life cycle	GO_BiologicalProcess-GOA_09.02.2016_16h18	8.8e-05	0.00084	[4, 5]	11.8393	56	[APOBEC3C, CDHR3, CHMP4B, DDB1, DDX3X, DDX5, EP300, ERCC2, GTF2H3, HAVCR1, HPN, HS3ST5, ITGAV, KPNA1, LAMP1, MVB12B, NEDD4L, NUP107, NUP155, NUP210, NUP37, NUP58, OAS1, P4HB, PABPC1, RAB1B, RAN, RPL10, RPL13, RPL15, RPL18, RPL23A, RPL31, RPL34, RPL37A, RPL5, RPL7, RPS10, RPS11, RPS12, RPS15, RPS16, RPS21, RPS5, RPS8, SCARB1, SNX3, TBC1D20, TFRC, THOC1, TNIP1, TRIM25, TRIM5, UBC, USP6NL, VAMP8]
GO:0000082	G1/S transition of mitotic cell cycle	GO_BiologicalProcess-GOA_09.02.2016_16h18	9.4e-05	0.00088	[6, 7]	13.6882	36	[AKT1, BACH1, BRIP1, CCND1, CDC25A, CDK1, CDKN1A, CDT1, CREBBP, DDX3X, E2F1, ECD, EIF4E, GFI1, GIGYF2, GSPT1, MCM10, MCM2, MCM7, PLCB1, PPP3CA, PRIM1, PRIM2, PSMA3, PSMA5, PSMA7, PSMB4, PSMC5, PSME3, RDX, RPS6KB1, RRM2, SENP2, TCF3, UBC, ZNF655]
GO:0019219	regulation of nucleobase-containing compound metabolic process	GO_BiologicalProcess-GOA_09.02.2016_16h18	9.3e-05	0.00088	[4, 5]	8.37975	346	[ABCA1, ABL1, ACIN1, ADGRG3, ADNP, AFF1, AFF4, AKT1, ALPK3, ANKRD52, ANXA4, APOC3, APP, ARGLU1, ARHGAP35, ARHGEF11, ARID1B, ARNTL2, ARRB1, ASF1B, ASXL1, ASXL2, ATAD2, ATF7, ATN1, ATPIF1, AURKAIP1, AXIN1, BACH1, BAG1, BARD1, BAZ1A, BAZ1B, BMP4, BPGM, BPTF, BRCA1, BRD2, BRIP1, BRMS1L, BUD31, C3orf33, C8orf4, CA9, CASK, CBL, CBX5, CC2D1A, CCNA2, CCND1, CCT2, CD40, CDCA7, CDCA7L, CDK1, CDK12, CDK13, …
GO:0043067	regulation of programmed cell death	GO_BiologicalProcess-GOA_09.02.2016_16h18	9.4e-05	0.00088	[4, 5]	9.46032	149	[ABL1, ACIN1, ADAMTSL4, ADNP, AKT1, AKT1S1, ANXA4, APH1A, ARHGEF11, ARRB1, ATPIF1, BAG1, BARD1, BCL2L1, BFAR, BMP4, BNIP2, BNIP3, BRAF, BRCA1, BRMS1L, BUD31, CASP10, CBL, CD40, CDK1, CDKN1A, CHD8, CRLF1, CYLD, DAB2IP, DAP, DDB1, DDX3X, DFNA5, DHODH, DLC1, DNAJA3, DUSP1, E2F1, ECT2, EDN1, EGR1, EIF2AK3, FGD4, FHL2, GDF11, GDF15, GDNF, GLO1, GOLPH3, GPLD1, HIF1A, HMGCR, HNRNPK, HPN, HSPH1, HYOU1, I…
GO:0023057	negative regulation of signaling	GO_BiologicalProcess-GOA_09.02.2016_16h18	9.7e-05	0.0009	[2, 3, 4]	9.74478	126	[ABL1, ADGRG3, ADNP, AHSG, AKT1, AKT1S1, ARF1, ARHGAP35, ARRB1, ASXL1, AXIN1, BCL2L1, BFAR, BMP4, BRAF, BRCA1, C3orf33, C8orf4, CBL, CCND1, CHD8, CRY2, CTHRC1, CYLD, DAB2IP, DDIT4, DDX3X, DKK1, DLC1, DLG1, DNAJA3, DUSP1, DUSP10, DUSP14, EDN1, EGR1, ERRFI1, EZR, GDNF, GNAI1, GNAI2, GPC3, GPD1L, GPRC5A, GSTO1, HADH, HHEX, HIF1A, HMGCR, HMGXB4, HSPH1, HYOU1, IGFBP1, IGFBP6, IL1RN, ITGA6, ITGAV, KLF4…
GO:0006405	RNA export from nucleus	GO_BiologicalProcess-GOA_09.02.2016_16h18	9.7e-05	0.0009	[5, 6, 8]	18.9474	18	[ALKBH5, CPSF1, DHX38, EIF4E, EIF5A, HHEX, IWS1, NUP107, NUP155, NXF1, RAN, SRSF3, SRSF4, SRSF7, SUPT6H, THOC1, TSC1, UPF2]
GO:0045047	protein targeting to ER	GO_BiologicalProcess-GOA_09.02.2016_16h18	0.0001	0.00093	[4, 6, 7, 8]	17.3554	21	[CHMP4B, RPL10, RPL13, RPL15, RPL18, RPL23A, RPL31, RPL34, RPL37A, RPL5, RPL7, RPS10, RPS11, RPS12, RPS15, RPS16, RPS21, RPS5, RPS8, SPCS3, SRP14]
GO:0070849	response to epidermal growth factor	GO_BiologicalProcess-GOA_09.02.2016_16h18	0.0001	0.00095	[3, 5]	28.5714	10	[AKT1, DAB2IP, ERRFI1, ID1, IL1R1, MBD4, MCM7, MED1, SOX9, VIL1]
GO:0006351	transcription, DNA-templated	GO_BiologicalProcess-GOA_09.02.2016_16h18	0.0001	0.00097	[5, 6, 7, 8, 9]	8.43562	323	[ABL1, ADGRG3, ADNP, AFF1, AFF4, AKT1, ALPK3, ANKRD52, ANXA4, APP, ARGLU1, ARHGAP35, ARHGEF11, ARID1B, ARNTL2, ARRB1, ASF1B, ASXL1, ASXL2, ATAD2, ATF7, ATN1, AXIN1, BACH1, BAG1, BAZ1A, BAZ1B, BMP4, BPTF, BRCA1, BRD2, BRIP1, BRMS1L, BUD31, C3orf33, C8orf4, CA9, CASK, CBL, CBX5, CC2D1A, CCNA2, CCND1, CD40, CDCA7, CDCA7L, CDK1, CDK12, CDK13, CDT1, CEBPG, CEP290, CHCHD2, CHD4, CHD8, CNOT3, CNOT6L, CO…
GO:0051128	regulation of cellular component organization	GO_BiologicalProcess-GOA_09.02.2016_16h18	0.0001	0.00097	[3, 4]	8.93617	210	[ABL1, ACSL3, ACSL4, ADD1, ADNP, AFAP1, AHSG, AKT1, ALMS1, ANAPC10, ANLN, ANXA7, APOA2, APOC1, APOC3, ARAP1, ARF1, ARHGAP35, ARHGEF11, ARIH2, ARPC3, ARRB1, ASXL2, ATAD2, ATAT1, ATPIF1, AURKAIP1, B2M, BCL2L1, BMP4, BNIP3, BRAF, BRCA1, BUD31, C3, CAPZB, CBL, CCT2, CDC42EP1, CDK13, CDKN1A, CFL2, CHMP4B, CLIC4, CLSTN1, CLSTN3, CNOT6L, CTSK, CTSV, CUL7, CXCL16, CYLD, DAB2IP, DBN1, DCDC2, DDX3X, DHODH,…
GO:0009636	response to toxic substance	GO_BiologicalProcess-GOA_09.02.2016_16h18	0.0001	0.00099	[3]	13.4545	37	[AOC3, APOM, BLMH, BPHL, CDK1, CDKN1A, CPS1, CYGB, CYP21A2, DDC, DLC1, EHMT1, GPX2, GPX3, GPX7, GSTA1, GSTO1, GSTZ1, HIF1A, ID1, IKBKB, JAK2, LYN, MGMT, MGST2, MPST, NFE2L2, NQO1, NUPR1, PPP1R15A, PRDX3, PRDX6, RPS6KB1, SDC1, SLC6A4, SOD2, TINAGL1]
GO:0000075	cell cycle checkpoint	GO_BiologicalProcess-GOA_09.02.2016_16h18	0.00011	0.001	[4, 5]	13.5849	36	[AKT1, ANAPC10, BCL2L1, BRCA1, BRIP1, CCNA2, CCND1, CDK1, CDKN1A, CDT1, DLG1, DTL, DUSP1, E2F1, FANCI, FOXO4, GDNF, GIGYF2, MDC1, MSH2, NEK6, PSMA3, PSMA5, PSMA7, PSMB4, PSMC5, PSME3, PSMG2, SPDL1, SYF2, THOC1, TTK, UBC, UBE2C, WAC, ZWINT]
GO:0008643	carbohydrate transport	GO_BiologicalProcess-GOA_09.02.2016_16h18	0.00011	0.001	[4, 5]	14.5631	30	[AKT1, BRAF, C3, EDN1, EZR, G6PC, GNAI2, GPC3, NFE2L2, NUP107, NUP155, NUP210, NUP37, NUP58, PRKCI, REPIN1, RPS6KB1, SLC2A1, SLC2A10, SLC2A2, SLC2A3, SLC2A9, SLC35A3, SLC35B4, SLC37A4, SORT1, STXBP4, TRIB3, TSC1, VIL1]
GO:0018193	peptidyl-amino acid modification	GO_BiologicalProcess-GOA_09.02.2016_16h18	0.00012	0.001	[6, 7]	9.54704	137	[ABL1, ADH5, ADNP, AKT1, ALG11, ANK2, APOA2, APP, ARRB1, ASXL2, ATAT1, AURKAIP1, AXIN1, B4GALT2, BAZ1B, BRAF, BRCA1, CAB39, CD40, CDK1, CNIH1, COG2, COPZ1, COQ7, CREBBP, CRLF1, CRTC2, CSNK1G2, DCTN6, DDIT4, DKK1, DMTN, DOCK7, DPY19L3, DYNC1H1, EFNA1, EGR1, EHMT1, EIF2AK3, EIF4E, EIF5A, EP300, EPHA1, ERRFI1, F5, FKBP10, FKBPL, GBF1, GDF15, GDNF, GFI1, GPD1L, GPRC5A, HCFC1, HNRNPK, HSPH1, IKBKB, IW…
GO:0009086	methionine biosynthetic process	GO_BiologicalProcess-GOA_09.02.2016_16h18	0.00013	0.0011	[6, 7, 8, 9, 10, 11]	38.8889	7	[ADI1, EIF2B2, EIF2B4, ENOPH1, GOT1, MTHFD1, MTR]
GO:0010558	negative regulation of macromolecule biosynthetic process	GO_BiologicalProcess-GOA_09.02.2016_16h18	0.00012	0.0011	[4, 5, 6]	9.47931	142	[ADGRG3, ANKRD52, ANXA4, ARHGAP35, ARRB1, ASXL1, ASXL2, ATAD2, ATF7, ATN1, AXIN1, BACH1, BMP4, BPTF, BRCA1, BRIP1, BRMS1L, CBX5, CC2D1A, CCND1, CEBPG, CHD4, CHD8, CNOT3, CNOT6L, COPS2, COQ7, CREBBP, CRY2, CYGB, CYLD, DAB2IP, DAP, DDX3X, DDX5, DEPDC1, DKK1, DLG1, DNAJA3, DUSP1, E2F1, EDN1, EFNA1, EGR1, EHMT1, EIF2AK3, EIF2B3, EIF2B4, EIF4E, ENO1, ENPP7, EP300, EPRS, ERRFI1, EZR, FHL2, FOXA2, GATAD…
GO:0030518	intracellular steroid hormone receptor signaling pathway	GO_BiologicalProcess-GOA_09.02.2016_16h18	0.00012	0.0011	[5, 6]	16.6667	22	[BRCA1, BUD31, CRY2, DDRGK1, DDX5, EP300, FHL2, FKBPL, JAK2, KMT2D, MBD4, MED1, MED17, NCOA1, NCOA4, PLPP1, PTGES3, RAN, RNF6, SAFB, UFL1, YWHAH]
GO:0033043	regulation of organelle organization	GO_BiologicalProcess-GOA_09.02.2016_16h18	0.00012	0.0011	[4, 5]	9.85433	115	[ABL1, ADD1, AFAP1, AKT1, ALMS1, ANAPC10, ANLN, ARAP1, ARF1, ARIH2, ARPC3, ARRB1, ASXL2, ATAD2, ATAT1, ATPIF1, AURKAIP1, BCL2L1, BMP4, BNIP3, BRAF, BRCA1, BUD31, CAPZB, CCT2, CDC42EP1, CDK13, CFL2, CHMP4B, CLIC4, CNOT6L, CTSK, CTSV, CUL7, CYLD, DCDC2, DHODH, DKC1, DLC1, DLG1, DMTN, DSTN, DUSP1, E2F1, ECT2, EDN1, EPHA1, EZR, FAM21C, FEZ2, FKBPL, GFI1, GMFB, GOLPH3, HIF1A, HMBOX1, HUWE1, ID1, IQGAP…
GO:0045717	negative regulation of fatty acid biosynthetic process	GO_BiologicalProcess-GOA_09.02.2016_16h18	0.00013	0.0011	[5, 6, 7, 8, 9, 10, 11]	46.1538	6	[APOC1, APOC3, BRCA1, ERLIN1, PIBF1, TRIB3]
GO:0019439	aromatic compound catabolic process	GO_BiologicalProcess-GOA_09.02.2016_16h18	0.00014	0.0012	[4]	11.6183	56	[APOBEC3C, ATAT1, BLVRA, BLVRB, CASC3, CNOT3, CNOT6L, CTIF, DDIT4, DERA, DNPH1, DUT, ECD, EIF4B, EIF4E, EIF4G1, EXOSC7, GSPT1, GSTZ1, HIF1A, KPNA1, LSM1, LSM5, MBD4, MIA3, MLH1, NEIL2, PABPC1, PDE7A, PPP2R1A, RACK1, RPL10, RPL13, RPL15, RPL18, RPL23A, RPL31, RPL34, RPL37A, RPL5, RPL7, RPS10, RPS11, RPS12, RPS15, RPS16, RPS21, RPS5, RPS8, SMG9, STAT3, TNRC6B, UHMK1, UNG, UPF2, UPF3A]
GO:0046700	heterocycle catabolic process	GO_BiologicalProcess-GOA_09.02.2016_16h18	0.00013	0.0012	[4]	11.7021	55	[APOBEC3C, BLVRA, BLVRB, CASC3, CNOT3, CNOT6L, CTIF, DDIT4, DERA, DNPH1, DUT, ECD, EIF4B, EIF4E, EIF4G1, EXOSC7, GSPT1, HIF1A, KPNA1, LSM1, LSM5, MBD4, MIA3, MLH1, NEIL2, PABPC1, PDE7A, PPP2R1A, PRODH2, RACK1, RPL10, RPL13, RPL15, RPL18, RPL23A, RPL31, RPL34, RPL37A, RPL5, RPL7, RPS10, RPS11, RPS12, RPS15, RPS16, RPS21, RPS5, RPS8, SMG9, STAT3, TNRC6B, UHMK1, UNG, UPF2, UPF3A]
GO:0043434	response to peptide hormone	GO_BiologicalProcess-GOA_09.02.2016_16h18	0.00014	0.0012	[4, 5, 6]	10.9546	70	[AHSG, AKT1, AKT1S1, APOC3, APRT, ATP6V0E1, BRAF, CAB39, CCNA2, CPS1, CRY2, CYC1, CYP21A2, DAB2IP, EDN1, EGR1, EIF2B2, EIF2B3, EIF2B4, EIF4B, EIF4E, EIF4G1, ERRFI1, FOXO4, GNAI1, GNAI2, GOT1, GPLD1, HADH, HHEX, HIF1A, HNRNPK, IGFBP1, JAK2, KHK, LYN, MARK3, MAX, NAMPT, NFKB1, NUCB2, NUCKS1, PFKFB1, PPARG, PRKAB1, PRKCI, PSMA3, PSMA5, PSMA7, PSMB4, PSMC5, PSME3, RAB8A, REPIN1, RPS6KB1, SLC2A2, SOCS…
GO:0009968	negative regulation of signal transduction	GO_BiologicalProcess-GOA_09.02.2016_16h18	0.00014	0.0012	[3, 4, 5, 6]	9.82906	115	[ABL1, ADGRG3, AHSG, AKT1, AKT1S1, ARHGAP35, ARRB1, ASXL1, AXIN1, BCL2L1, BFAR, BMP4, BRCA1, C3orf33, C8orf4, CBL, CCND1, CHD8, CRY2, CTHRC1, CYLD, DAB2IP, DDIT4, DDX3X, DKK1, DLC1, DLG1, DNAJA3, DUSP1, DUSP10, DUSP14, EGR1, ERRFI1, EZR, GDNF, GPC3, GPD1L, GPRC5A, GSTO1, HHEX, HIF1A, HMGCR, HMGXB4, HSPH1, HYOU1, IGFBP1, IGFBP6, IL1RN, ITGA6, ITGAV, KLF4, LITAF, LRP4, LRRK2, LYN, MAPKAP1, MCL1, MI…
GO:0005975	carbohydrate metabolic process	GO_BiologicalProcess-GOA_09.02.2016_16h18	0.00013	0.0012	[3]	9.97204	107	[ACADM, ADAMTSL4, ADNP, AKR7A2, AKT1, ALG11, ANK2, B3GLCT, B4GALT2, BPGM, CCDC126, CHPF, CNIH1, COG2, COPZ1, CPS1, CRTC2, CYP21A2, DCTN6, DDIT4, DERA, DHTKD1, DPY19L3, DYNC1H1, ECD, ENO1, F5, FOXA2, FUT6, G6PC, GALE, GBF1, GLCE, GLO1, GNMT, GNPTAB, GOT1, GPC3, GPD1L, GPLD1, GSTO1, GXYLT1, HECTD4, HIF1A, HS3ST3B1, HS3ST5, IMPAD1, INPP1, KHK, LIG1, MAGT1, MAN2A2, MAN2B1, MDH1, MIA3, MOGAT2, MVD, NF…
GO:0043409	negative regulation of MAPK cascade	GO_BiologicalProcess-GOA_09.02.2016_16h18	0.00014	0.0012	[5, 6, 7, 8, 9, 10, 11]	15.894	24	[ABL1, AKT1, ARRB1, BMP4, C3orf33, DAB2IP, DLG1, DUSP1, DUSP10, DUSP14, ERRFI1, EZR, HMGCR, HSPH1, KLF4, LYN, PBK, PDCD4, PPP2R1A, SORL1, SPRED2, SPRY1, STK38, TNIP1]
GO:0071427	mRNA-containing ribonucleoprotein complex export from nucleus	GO_BiologicalProcess-GOA_09.02.2016_16h18	0.00014	0.0012	[5, 6, 7, 9]	19.7531	16	[ALKBH5, CPSF1, DHX38, EIF4E, EIF5A, HHEX, IWS1, NUP107, NUP155, NXF1, SRSF3, SRSF4, SRSF7, SUPT6H, THOC1, UPF2]
GO:0006406	mRNA export from nucleus	GO_BiologicalProcess-GOA_09.02.2016_16h18	0.00014	0.0012	[5, 6, 7, 8, 9, 10]	19.7531	16	[ALKBH5, CPSF1, DHX38, EIF4E, EIF5A, HHEX, IWS1, NUP107, NUP155, NXF1, SRSF3, SRSF4, SRSF7, SUPT6H, THOC1, UPF2]
GO:0043620	regulation of DNA-templated transcription in response to stress	GO_BiologicalProcess-GOA_09.02.2016_16h18	0.00014	0.0012	[4, 6, 7, 8, 9, 10, 11]	20.5479	15	[BACH1, BRIP1, C8orf4, CA9, CREB3L3, CREBBP, EGR1, EP300, HIF1A, MBTPS2, MIA3, NFE2L2, PPP1R15A, UBC, UBE2D2]
GO:0006641	triglyceride metabolic process	GO_BiologicalProcess-GOA_09.02.2016_16h18	0.00016	0.0013	[6, 7]	15.4321	25	[ACLY, ACOT11, ACSL1, ACSL3, ACSL4, AGPAT1, APOA2, APOC1, APOC3, C3, CPS1, CTDNEP1, CYP21A2, ELOVL6, G6PC, GPD1L, GPLD1, LPCAT1, MOGAT2, MTTP, PPT1, SCARB1, SLC25A1, SLC37A4, THEM4]
GO:0007051	spindle organization	GO_BiologicalProcess-GOA_09.02.2016_16h18	0.00015	0.0013	[4, 5, 6]	16.0839	23	[CEP192, CHD4, CHMP4B, DCTN6, DLG1, DYNC1H1, EZR, HAUS6, KIF23, MLH1, NEK6, PIBF1, PPP2R1A, RAB11A, RAN, STIL, STMN1, SUN2, TACC2, TPX2, TTK, TUBB, TUBB1]
GO:0044283	small molecule biosynthetic process	GO_BiologicalProcess-GOA_09.02.2016_16h18	0.00015	0.0013	[4]	11.0379	67	[ABAT, ACADM, ACLY, ACSL3, ACSS1, ADI1, ADSL, AKR1D1, APOA2, APOC1, APOC3, ATPIF1, BPGM, BRCA1, COQ7, CPS1, CRTC2, CYP21A2, EDN1, EIF2B2, EIF2B4, ELOVL6, ENO1, ENOPH1, ERLIN1, FDPS, G6PC, GATM, GFI1, GGT1, GNMT, GOT1, GSTO1, HMGCR, HSD17B8, IMPAD1, LBR, LPCAT1, MDH1, MGST2, MIF, MSMO1, MTHFD1, MTR, MVD, MVK, NDUFAB1, NFKB1, PCNX4, PECR, PFKFB1, PGD, PIBF1, PRKAB1, PSAT1, PTAFR, PTGES2, PTGES3, SE…
GO:0072599	establishment of protein localization to endoplasmic reticulum	GO_BiologicalProcess-GOA_09.02.2016_16h18	0.00016	0.0013	[5, 6, 7]	16.8	21	[CHMP4B, RPL10, RPL13, RPL15, RPL18, RPL23A, RPL31, RPL34, RPL37A, RPL5, RPL7, RPS10, RPS11, RPS12, RPS15, RPS16, RPS21, RPS5, RPS8, SPCS3, SRP14]
GO:0032269	negative regulation of cellular protein metabolic process	GO_BiologicalProcess-GOA_09.02.2016_16h18	0.00015	0.0013	[4, 5, 6, 7]	9.91736	108	[ABL1, AHSG, AKT1, AKT1S1, ANAPC10, APP, ARRB1, BAG1, BMP4, BRCA1, C3, C3orf33, CAMK2N1, CDKN1A, CEP192, CNOT3, CNOT6L, CRY2, DAB2IP, DDIT4, DDX3X, DKK1, DLG1, DMTN, DNAJA3, DNAJB2, DUSP1, DUSP10, DUSP14, EDN1, EIF2AK3, EIF2B3, EIF2B4, EIF4E, EPHA1, EPRS, ERRFI1, EZR, GIGYF2, GMFB, GPC3, GPD1L, GPRC5A, HHEX, HMGCR, HPN, HSPH1, IKBKB, ITIH5, KDM4A, KLF4, KNG1, LRRK2, LYN, MIF, MPP2, MYO1D, NFKB1, …
GO:0071364	cellular response to epidermal growth factor stimulus	GO_BiologicalProcess-GOA_09.02.2016_16h18	0.00015	0.0013	[4, 6]	30	9	[AKT1, DAB2IP, ERRFI1, ID1, MBD4, MCM7, MED1, SOX9, VIL1]
GO:0006614	SRP-dependent cotranslational protein targeting to membrane	GO_BiologicalProcess-GOA_09.02.2016_16h18	0.00018	0.0014	[5, 7, 8, 9, 10]	17.094	20	[RPL10, RPL13, RPL15, RPL18, RPL23A, RPL31, RPL34, RPL37A, RPL5, RPL7, RPS10, RPS11, RPS12, RPS15, RPS16, RPS21, RPS5, RPS8, SPCS3, SRP14]
GO:0016568	chromatin modification	GO_BiologicalProcess-GOA_09.02.2016_16h18	0.00016	0.0014	[5, 6]	10.935	69	[ACTB, ARID1B, ARRB1, ASF1B, ASXL1, ASXL2, ATAD2, BAZ1A, BAZ1B, BPTF, BRCA1, BRD2, BRMS1L, CDK1, CHD4, CHD8, CHRAC1, CREBBP, CRTC2, DDB1, EHMT1, EIF4E, EP300, FOXA2, GATAD2B, GDNF, GFI1, HCFC1, HUWE1, ITGB3BP, IWS1, JADE2, JAK2, KAT6A, KDM4A, KDM7A, KMT2C, KMT2D, LDB1, MBD2, MSL3, MTA2, NASP, NCOA1, PAXIP1, PBRM1, PIWIL2, POU5F1, PRDM4, PRMT7, RCOR1, RNF8, RUVBL2, SATB2, SF3B3, SFPQ, SIRT7, SMARC…
GO:1901652	response to peptide	GO_BiologicalProcess-GOA_09.02.2016_16h18	0.00016	0.0014	[4, 5]	10.7829	73	[AHSG, AKT1, AKT1S1, APOC3, APRT, ATP6V0E1, BRAF, CAB39, CCNA2, CPS1, CRY2, CYC1, CYP21A2, DAB2IP, EDN1, EGR1, EIF2B2, EIF2B3, EIF2B4, EIF4B, EIF4E, EIF4G1, ERRFI1, FOXO4, GNAI1, GNAI2, GOT1, GPLD1, HADH, HHEX, HIF1A, HNRNPK, ID1, IGFBP1, JAK2, KHK, KLF4, LYN, MARK3, MAX, NAMPT, NFKB1, NUCB2, NUCKS1, PFKFB1, PPARG, PRKAB1, PRKCI, PSMA3, PSMA5, PSMA7, PSMB4, PSMC5, PSME3, RAB8A, REPIN1, RPS6KB1, S…
GO:0051252	regulation of RNA metabolic process	GO_BiologicalProcess-GOA_09.02.2016_16h18	0.00017	0.0014	[4, 5, 6, 7]	8.39937	318	[ABL1, ACIN1, ADGRG3, ADNP, AFF1, AFF4, AKT1, ALPK3, ANKRD52, ANXA4, APP, ARGLU1, ARHGAP35, ARHGEF11, ARID1B, ARNTL2, ARRB1, ASF1B, ASXL1, ASXL2, ATAD2, ATF7, ATN1, AURKAIP1, AXIN1, BACH1, BAG1, BARD1, BAZ1A, BAZ1B, BMP4, BPTF, BRCA1, BRD2, BRIP1, BRMS1L, BUD31, C3orf33, C8orf4, CA9, CASK, CBL, CBX5, CC2D1A, CCNA2, CCND1, CD40, CDCA7, CDCA7L, CDK1, CDK12, CDK13, CDT1, CEBPG, CEP290, CHCHD2, CHD4,…
GO:1903507	negative regulation of nucleic acid-templated transcription	GO_BiologicalProcess-GOA_09.02.2016_16h18	0.00016	0.0014	[6, 7, 8, 9, 10]	9.67486	122	[ADGRG3, ANKRD52, ANXA4, ARHGAP35, ARRB1, ASXL1, ASXL2, ATAD2, ATF7, ATN1, AXIN1, BACH1, BMP4, BPTF, BRCA1, BRIP1, BRMS1L, CBX5, CC2D1A, CCND1, CEBPG, CHD4, CHD8, COPS2, COQ7, CREBBP, CRY2, CYLD, DAB2IP, DAP, DDX5, DEPDC1, DKK1, DLG1, DNAJA3, E2F1, EDN1, EFNA1, EGR1, EHMT1, ENO1, EP300, EZR, FHL2, FOXA2, GATAD2B, GDNF, GFI1, HCFC1, HDGF, HHEX, HIF1A, HIST1H2AC, HIVEP1, HMBOX1, HNRNPK, ID1, ID3, I…
GO:0006986	response to unfolded protein	GO_BiologicalProcess-GOA_09.02.2016_16h18	0.00017	0.0014	[4, 5]	15.1163	26	[ADD1, BFAR, CCND1, CREB3L3, CUL7, DAB2IP, DNAJB1, DNAJB11, DNAJB2, EIF2AK3, EP300, ERO1A, HDGF, HSPA4, HSPH1, HYOU1, IGFBP1, MBTPS1, MBTPS2, NFE2L2, POMT2, PPP1R15A, RACK1, UBE2J2, WIPI1, ZBTB17]
GO:0044282	small molecule catabolic process	GO_BiologicalProcess-GOA_09.02.2016_16h18	0.00017	0.0014	[4]	12.0603	48	[ABAT, ACAD9, ACADM, ACADS, ADH4, ADH5, ADSL, AKR1B10, AKR1D1, AKT1, ALDH3B1, ALDH7A1, APOC1, ATAT1, CSAD, CYP4F12, CYP4F2, DDAH1, DECR1, DLST, DTD1, ECH1, ENO1, ENPP7, ESD, FUT6, GALE, GCAT, GOT1, GSTZ1, HACL1, HADH, HADHB, INPP1, IVD, KHK, OGDH, PFKFB1, PFKL, PHYH, PIPOX, PPM1K, PRODH2, RBKS, RPE, SCARB1, SULT2A1, TINAGL1]
GO:0006805	xenobiotic metabolic process	GO_BiologicalProcess-GOA_09.02.2016_16h18	0.00017	0.0014	[3, 5]	14.4279	29	[ACSL1, ACSS1, ADH4, ADH5, AKR1C1, AKR7A2, AOC3, AURKAIP1, BPHL, CYP19A1, CYP21A2, CYP4F12, CYP4F2, EIF4G2, ESD, GGT1, GSTA1, GSTM4, GSTO1, GSTZ1, MAT1A, MGST2, MTR, NCEH1, NQO1, NR1I2, PAPSS2, SULT2A1, UGP2]
GO:0008202	steroid metabolic process	GO_BiologicalProcess-GOA_09.02.2016_16h18	0.00019	0.0015	[4]	12.7389	40	[ABCA1, ACLY, AKR1B10, AKR1C1, AKR1C2, AKR1D1, APOA2, APOC1, APOC3, APOF, APP, ATP1A1, CYP19A1, CYP21A2, ERLIN1, FDPS, FOXA2, G6PC, GFI1, HMGCR, HSD17B11, HSD17B8, LBR, MBD4, MBTPS1, MBTPS2, MED1, MSMO1, MVD, MVK, NCOA1, NFKB1, NR1I2, SCARB1, SLC37A4, SORL1, SULT2A1, UGT2B7, VDAC2, YWHAH]
GO:0070201	regulation of establishment of protein localization	GO_BiologicalProcess-GOA_09.02.2016_16h18	0.00018	0.0015	[4, 5]	10.2247	91	[ABAT, ABL1, ACSL3, AKT1, ANXA4, APOA2, ARF1, ARIH2, ARRB1, ATPIF1, AXIN1, BARD1, BCL2L1, BMP4, BRCA1, BTN2A2, C8orf4, CACNA1D, CCT2, CD40, CDK1, CDKN1A, CEP290, CTSK, CYLD, DAB2IP, DDX58, DKC1, DLG1, DMTN, E2F1, ECT2, EZR, FOXA2, GNAI2, GOLPH3, GPLD1, HADH, HIF1A, HMGCR, HSPH1, HUWE1, JAK2, KPNA1, LITAF, LRRK2, LYN, LYPLA1, LYPLAL1, MBD4, MBTPS1, MED1, MIEF1, MIF, MYCBP2, MYO18A, NDEL1, NFKBIB, …
GO:0050684	regulation of mRNA processing	GO_BiologicalProcess-GOA_09.02.2016_16h18	0.00019	0.0015	[5, 6, 7, 8, 9]	18	18	[ACIN1, BARD1, DAZAP1, DDX5, HNRNPK, IWS1, MBNL1, PABPC1, PTBP1, RBM10, RBM25, SAFB, SFSWAP, SRSF4, SRSF7, SUPT6H, TNRC6B, UHMK1]
GO:0010243	response to organonitrogen compound	GO_BiologicalProcess-GOA_09.02.2016_16h18	0.00018	0.0015	[3, 4]	9.95215	104	[ABAT, ABL1, AHSG, AKT1, AKT1S1, APOC3, APP, APRT, ATP6V0E1, BCL2L1, BRAF, BRCA1, C12orf76, CAB39, CCNA2, CCND1, CDK1, CDKN1A, CHRNA2, COL4A6, CPS1, CRY2, CYC1, CYP21A2, DAB2IP, DDC, DHODH, DMTN, DPYSL2, DUSP1, EDN1, EGR1, EIF2B2, EIF2B3, EIF2B4, EIF4B, EIF4E, EIF4G1, ERRFI1, EZR, FOXO4, GNAI1, GNAI2, GOT1, GPLD1, HADH, HHEX, HIF1A, HNRNPK, ID1, IGFBP1, JAK2, KHK, KLF4, LRRK2, LYN, MARK3, MAX, MG…
GO:0090150	establishment of protein localization to membrane	GO_BiologicalProcess-GOA_09.02.2016_16h18	0.00021	0.0016	[4, 5, 6]	12.0513	47	[ACSL3, AKT1, ANK2, ARFRP1, ARL4D, BCL2L1, BRAF, CHMP4B, DLG1, DMTN, E2F1, EZR, GOLPH3, HSPA4, IKBKB, LYPLA1, LYPLAL1, MIEF1, OXA1L, PRKCI, RAB11A, RACK1, RDX, RILPL2, RPL10, RPL13, RPL15, RPL18, RPL23A, RPL31, RPL34, RPL37A, RPL5, RPL7, RPS10, RPS11, RPS12, RPS15, RPS16, RPS21, RPS5, RPS8, SPCS3, SRP14, TSPAN14, VIL1, YWHAH]
GO:0007346	regulation of mitotic cell cycle	GO_BiologicalProcess-GOA_09.02.2016_16h18	0.0002	0.0016	[4, 5]	11.3027	59	[ABL1, AKT1, ANAPC10, ANLN, APP, AURKAIP1, BCL2L1, BMP4, CCNA2, CCND1, CDK1, CDK13, CDKN1A, CHMP4B, CREBBP, CUL7, CYLD, DDB1, DDX3X, DLG1, DUSP1, E2F1, ECD, EDN1, EIF4E, ERCC2, FANCI, FOXO4, GBF1, GDNF, GIGYF2, MAP4K3, MDC1, MSH2, NEK6, NUSAP1, PIM3, PLCB1, PSMA3, PSMA5, PSMA7, PSMB4, PSMC5, PSME3, PSMG2, PTGES2, RAB11A, RAD51B, RDX, RPS6KB1, SENP2, SYF2, TCF3, TPX2, TTK, UBC, UBE2C, ZNF655, ZWIN…
GO:1901990	regulation of mitotic cell cycle phase transition	GO_BiologicalProcess-GOA_09.02.2016_16h18	0.00021	0.0016	[5, 6, 7]	13.0282	37	[AKT1, ANAPC10, ANLN, APP, CCNA2, CCND1, CDK1, CDKN1A, CREBBP, DDB1, DDX3X, DUSP1, E2F1, ECD, ERCC2, FANCI, FOXO4, GIGYF2, NEK6, PLCB1, PSMA3, PSMA5, PSMA7, PSMB4, PSMC5, PSME3, PSMG2, RAB11A, RAD51B, RDX, SENP2, SYF2, TCF3, TTK, UBC, UBE2C, ZNF655]
GO:0010941	regulation of cell death	GO_BiologicalProcess-GOA_09.02.2016_16h18	0.00021	0.0016	[3, 4]	9.23719	155	[ABL1, ACIN1, ADAMTSL4, ADNP, AKT1, AKT1S1, ANXA4, APH1A, ARHGEF11, ARRB1, ATPIF1, BAG1, BARD1, BCL2L1, BFAR, BMP4, BNIP2, BNIP3, BRAF, BRCA1, BRMS1L, BUD31, CASP10, CBL, CD40, CDK1, CDKN1A, CHD8, CHMP4B, CRLF1, CYLD, DAB2IP, DAP, DDB1, DDIT4, DDX3X, DFNA5, DHODH, DLC1, DNAJA3, DUSP1, E2F1, ECT2, EDN1, EGR1, EIF2AK3, FGD4, FHL2, GDF11, GDF15, GDNF, GLO1, GOLPH3, GPLD1, HIF1A, HMGCR, HNRNPK, HPN, …
GO:0000097	sulfur amino acid biosynthetic process	GO_BiologicalProcess-GOA_09.02.2016_16h18	0.00021	0.0017	[5, 6, 7, 8, 9]	32	8	[ADI1, EIF2B2, EIF2B4, ENOPH1, GGT1, GOT1, MTHFD1, MTR]
GO:0032268	regulation of cellular protein metabolic process	GO_BiologicalProcess-GOA_09.02.2016_16h18	0.00021	0.0017	[4, 5, 6]	8.74658	224	[ABCF1, ABL1, ACSL1, ADNP, AHSG, AKT1, AKT1S1, ANAPC10, APP, ARIH2, ARRB1, ARRDC3, ASXL2, ATPIF1, AURKAIP1, AXIN1, BAG1, BMP4, BNIP2, BRAF, BRCA1, BRMS1L, BUD31, C3, C3orf33, CAB39, CAMK2N1, CASC3, CCDC6, CCL16, CCNA2, CCND1, CD40, CDC25A, CDK1, CDK12, CDKN1A, CEP192, CKS2, CLPX, CNOT3, CNOT6L, CRKL, CRLF1, CRY2, CSNK2B, CTIF, DAB2IP, DAP, DCUN1D2, DDIT4, DDRGK1, DDX3X, DKK1, DLC1, DLG1, DMTN, DN…
GO:0006892	post-Golgi vesicle-mediated transport	GO_BiologicalProcess-GOA_09.02.2016_16h18	0.00022	0.0017	[6, 7]	16.4062	21	[ACSL3, AP1G1, AP1S2, APP, ARF1, ARFRP1, ARRB1, BLOC1S6, DOPEY2, GBF1, GOLPH3, LAMP1, LYPLA1, LYPLAL1, PTGES2, RAB29, RACK1, SORL1, SORT1, VAMP8, WIPI1]
GO:1901987	regulation of cell cycle phase transition	GO_BiologicalProcess-GOA_09.02.2016_16h18	0.00022	0.0017	[5, 6]	12.7451	39	[AKT1, ANAPC10, ANLN, APP, C8orf4, CCNA2, CCND1, CDK1, CDKN1A, CREBBP, DDB1, DDX3X, DUSP1, E2F1, ECD, ERCC2, FANCI, FOXO4, GIGYF2, NEK6, PLCB1, PSMA3, PSMA5, PSMA7, PSMB4, PSMC5, PSME3, PSMG2, RAB11A, RAD51B, RDX, SENP2, STXBP4, SYF2, TCF3, TTK, UBC, UBE2C, ZNF655]
GO:0006613	cotranslational protein targeting to membrane	GO_BiologicalProcess-GOA_09.02.2016_16h18	0.00022	0.0017	[6, 7, 8, 9]	16.8067	20	[RPL10, RPL13, RPL15, RPL18, RPL23A, RPL31, RPL34, RPL37A, RPL5, RPL7, RPS10, RPS11, RPS12, RPS15, RPS16, RPS21, RPS5, RPS8, SPCS3, SRP14]
GO:0046128	purine ribonucleoside metabolic process	GO_BiologicalProcess-GOA_09.02.2016_16h18	0.00022	0.0017	[6, 7, 8]	12.2563	44	[ADSL, AK1, APOC3, APRT, ATP5G2, ATP5I, ATPIF1, BPGM, CASK, COA6, COQ7, COX5A, DDIT4, DHTKD1, DLG1, ECD, ENO1, GNAI3, GNMT, HIF1A, HMGCR, LRRK2, MAT1A, MIA3, MPP1, MPP2, MSH2, NDUFA10, NDUFA4, NDUFA8, NDUFAB1, NDUFB5, OGDH, PANK1, PAPSS2, PFKFB1, PFKL, PMPCB, SLC25A25, STAT3, STOML2, SULT2A1, UQCC2, UQCRC1]
GO:0071453	cellular response to oxygen levels	GO_BiologicalProcess-GOA_09.02.2016_16h18	0.00022	0.0017	[4]	15.1515	25	[AKT1, BACH1, BNIP3, BRIP1, BUD31, CA9, CCNA2, CHCHD2, CREBBP, E2F1, EDN1, EGR1, EP300, ERO1A, HIF1A, HYOU1, MIA3, P4HB, PDK1, PPARG, PPP1R15A, SLC29A1, TSC1, UBC, UBE2D2]
GO:0043618	regulation of transcription from RNA polymerase II promoter in response to stress	GO_BiologicalProcess-GOA_09.02.2016_16h18	0.00022	0.0017	[5, 7, 8, 9, 10, 11, 12]	20.5882	14	[BACH1, BRIP1, CA9, CREB3L3, CREBBP, EGR1, EP300, HIF1A, MBTPS2, MIA3, NFE2L2, PPP1R15A, UBC, UBE2D2]
GO:0061418	regulation of transcription from RNA polymerase II promoter in response to hypoxia	GO_BiologicalProcess-GOA_09.02.2016_16h18	0.00021	0.0017	[5, 6, 7, 8, 9, 10, 11, 12, 13]	26.3158	10	[BACH1, BRIP1, CA9, CREBBP, EGR1, EP300, HIF1A, MIA3, UBC, UBE2D2]
GO:0033993	response to lipid	GO_BiologicalProcess-GOA_09.02.2016_16h18	0.00023	0.0018	[4]	10.0636	95	[ABCA1, ABCA3, ABL1, ACADM, ACADS, ACSL1, ADH5, AKR1C2, AKT1, APOA2, APOC3, ASXL1, ATAT1, ATP1A1, B2M, BMP4, BRCA1, BUD31, C3, CA9, CCNA2, CCND1, CD40, CDKN1A, CPS1, CTSV, CXCL16, CYP21A2, DAB2IP, DKK1, DUSP1, DUSP10, E2F1, EDN1, EP300, ERRFI1, GFI1, GNAI1, GNAI2, GOT1, GPLD1, HIF1A, HNRNPK, IGF2R, IKBKB, IL1RN, JAK2, KLF4, KMT2D, LITAF, LOX, LYN, MBD4, MED1, MGST2, MIF, MMP15, MYCBP2, NASP, NCOA…
GO:0071310	cellular response to organic substance	GO_BiologicalProcess-GOA_09.02.2016_16h18	0.00023	0.0018	[4]	8.77692	216	[ABCA1, ABL1, ACSL1, ADD1, AGPAT1, AHSG, AKR1C1, AKR1C2, AKT1, AKT1S1, APH1A, APOC3, APP, APRT, ARHGEF11, ARRB1, ATP1A1, ATP6V0E1, AXIN1, B2M, BCL2L1, BFAR, BMP4, BPTF, BRAF, BRCA1, BUD31, CAB39, CASK, CBL, CCL16, CCNA2, CCND1, CD40, CDH5, CDKN1A, CEP57, CLSTN1, COL4A6, CPS1, CREB3L3, CRKL, CSNK2B, CTSL, CUL7, CXCL16, CYLD, CYP21A2, DAB2IP, DDC, DDIT4, DKK1, DMTN, DNAJA3, DNAJB11, DUSP1, E2F1, EC…
GO:0050767	regulation of neurogenesis	GO_BiologicalProcess-GOA_09.02.2016_16h18	0.00024	0.0018	[5, 6, 7, 8]	10.5556	76	[ABL1, ADNP, AKT1, APP, ARF1, ARHGAP35, BMP4, BNIP2, BRAF, BUD31, CDK1, CUL7, DAB2IP, DBN1, DKK1, DOCK7, DPYSL2, DUSP10, ECT2, EFNA1, EIF4E, EIF4G1, FKBPL, FOXA2, GDF11, GDNF, GDPD5, GFI1, HIF1A, HNRNPK, ID1, IKBKB, KLF4, L1CAM, LRP4, LRRK2, LSM1, LYN, MAP1B, MBD4, MED1, MOB2, NCKIPSD, NCOA1, NDEL1, NDRG4, NEDD4L, NGEF, NREP, NRP1, NSMF, NUMB, PPARG, PPP3CA, PRKCI, PSEN1, RAB11A, RAB29, RAC3, RBM…
GO:2001242	regulation of intrinsic apoptotic signaling pathway	GO_BiologicalProcess-GOA_09.02.2016_16h18	0.00024	0.0018	[5, 6, 7, 8]	15.0602	25	[AKT1, BCL2L1, CYLD, DDX3X, DFNA5, EIF2AK3, HIF1A, HNRNPK, HSPH1, HYOU1, LRRK2, MCL1, MIF, NFE2L2, NOL3, P4HB, PIAS4, PLAGL2, RACK1, SEPT4, SERINC3, SFPQ, SOD2, TMEM161A, VDAC2]
GO:0044723	single-organism carbohydrate metabolic process	GO_BiologicalProcess-GOA_09.02.2016_16h18	0.00025	0.0019	[3, 4]	10.158	90	[ACADM, ADAMTSL4, ADNP, AKT1, ALG11, ANK2, B3GLCT, B4GALT2, BPGM, CCDC126, CNIH1, COG2, COPZ1, CPS1, CRTC2, CYP21A2, DCTN6, DDIT4, DHTKD1, DPY19L3, DYNC1H1, ECD, ENO1, F5, FOXA2, FUT6, G6PC, GALE, GBF1, GNMT, GNPTAB, GOT1, GPLD1, GSTO1, GXYLT1, HECTD4, HIF1A, IMPAD1, INPP1, KHK, LIG1, MAGT1, MAN2A2, MAN2B1, MDH1, MIA3, MOGAT2, MVD, NFKB1, OAS1, OGDH, PCNX4, PDCD6, PDHB, PDIA3, PDK1, PFKFB1, PFKL,…
GO:1902175	regulation of oxidative stress-induced intrinsic apoptotic signaling pathway	GO_BiologicalProcess-GOA_09.02.2016_16h18	0.00026	0.0019	[5, 6, 7, 8, 9]	28.125	9	[AKT1, HIF1A, HSPH1, MCL1, NFE2L2, NOL3, P4HB, SFPQ, SOD2]
GO:0042278	purine nucleoside metabolic process	GO_BiologicalProcess-GOA_09.02.2016_16h18	0.00027	0.002	[5, 6, 7]	12.1547	44	[ADSL, AK1, APOC3, APRT, ATP5G2, ATP5I, ATPIF1, BPGM, CASK, COA6, COQ7, COX5A, DDIT4, DHTKD1, DLG1, ECD, ENO1, GNAI3, GNMT, HIF1A, HMGCR, LRRK2, MAT1A, MIA3, MPP1, MPP2, MSH2, NDUFA10, NDUFA4, NDUFA8, NDUFAB1, NDUFB5, OGDH, PANK1, PAPSS2, PFKFB1, PFKL, PMPCB, SLC25A25, STAT3, STOML2, SULT2A1, UQCC2, UQCRC1]
GO:1902679	negative regulation of RNA biosynthetic process	GO_BiologicalProcess-GOA_09.02.2016_16h18	0.00027	0.002	[5, 6, 7, 8, 9]	9.56113	122	[ADGRG3, ANKRD52, ANXA4, ARHGAP35, ARRB1, ASXL1, ASXL2, ATAD2, ATF7, ATN1, AXIN1, BACH1, BMP4, BPTF, BRCA1, BRIP1, BRMS1L, CBX5, CC2D1A, CCND1, CEBPG, CHD4, CHD8, COPS2, COQ7, CREBBP, CRY2, CYLD, DAB2IP, DAP, DDX5, DEPDC1, DKK1, DLG1, DNAJA3, E2F1, EDN1, EFNA1, EGR1, EHMT1, ENO1, EP300, EZR, FHL2, FOXA2, GATAD2B, GDNF, GFI1, HCFC1, HDGF, HHEX, HIF1A, HIST1H2AC, HIVEP1, HMBOX1, HNRNPK, ID1, ID3, I…
GO:0030521	androgen receptor signaling pathway	GO_BiologicalProcess-GOA_09.02.2016_16h18	0.00026	0.002	[6, 7]	20.2899	14	[BRCA1, BUD31, DDX5, EP300, FHL2, FKBPL, MBD4, MED1, MED17, NCOA1, NCOA4, PLPP1, RAN, RNF6]
GO:0051259	protein oligomerization	GO_BiologicalProcess-GOA_09.02.2016_16h18	0.00028	0.002	[5, 6]	11.4407	54	[ACADM, ACADS, ADSL, AKR1C1, ATPIF1, AXIN1, BRAF, C1QTNF6, CAB39, CEP57, CHMP4B, CHRNA2, CPSF6, CPSF7, CRTC2, DECR1, ECT2, EIF2AK3, GJB1, GNMT, GPX3, GRHPR, HACL1, HMGCR, KCNG3, KCTD2, LRP4, MIF, MYCBP2, NOL3, NUDT21, NUP58, OAS1, OXA1L, PANX1, PFKL, POLQ, PRKAB1, RACK1, RIPK1, RRM1, RRM2, SLC6A4, SOD2, SORL1, STOML2, TINAGL1, TNFAIP1, TNFAIP3, TRIM4, TRIM5, TSC1, VASP, ZNF395]
GO:0006338	chromatin remodeling	GO_BiologicalProcess-GOA_09.02.2016_16h18	0.00029	0.0021	[6, 7]	15.4362	23	[ACTB, ARID1B, BAZ1A, BAZ1B, BPTF, CHD4, CHD8, CHRAC1, GATAD2B, ITGB3BP, MBD2, MSL3, MTA2, NASP, PBRM1, RNF8, RUVBL2, SATB2, SMARCA5, SMARCC2, SMARCD2, SOX9, SUPT6H]
GO:0051384	response to glucocorticoid	GO_BiologicalProcess-GOA_09.02.2016_16h18	0.00028	0.0021	[6, 7]	14.4385	27	[ABCA3, ACADM, ACADS, APOA2, ATAT1, BMP4, C3, CCND1, CDKN1A, CPS1, CTSV, CYP21A2, DUSP1, EDN1, ERRFI1, GOT1, HIF1A, IL1RN, JAK2, MYCBP2, PFKFB1, PTAFR, RPS6KB1, SDC1, SSTR5, TINAGL1, UBE2L3]
GO:0007584	response to nutrient	GO_BiologicalProcess-GOA_09.02.2016_16h18	0.00029	0.0021	[3, 5]	13.6564	31	[ABCA1, ABCG5, ACADM, ACSL1, ACSL3, ACSL4, ADSL, APOC3, BRCA1, BRIP1, CCND1, FOXA2, GNAI2, HMGCR, MBD4, MED1, MGMT, NCOA1, NQO1, PAWR, PPARG, PRDM4, RPS6KB1, SERPINC1, SLC16A1, SLC37A4, SLC6A4, SOD2, TFRC, TINAGL1, VDAC2]
GO:0009743	response to carbohydrate	GO_BiologicalProcess-GOA_09.02.2016_16h18	0.00028	0.0021	[4]	13.3603	33	[ADNP, APOA2, APOC3, APOM, ARRB1, CTSV, EGR1, EIF2B2, EIF2B3, EIF2B4, FOXA2, GNAI2, GPLD1, HHEX, HIF1A, HMGCR, HNRNPK, IL1R1, KHK, LYN, NFKB1, NUCB2, PFKL, PIM3, PPP1R15A, PPP3CA, RACK1, RPS6KB1, SLC29A1, SLC2A2, SLC37A4, SOD2, STXBP4]
GO:0043241	protein complex disassembly	GO_BiologicalProcess-GOA_09.02.2016_16h18	0.00031	0.0022	[5]	12.3494	41	[ADD1, AURKAIP1, BNIP3, CAPZB, CFL2, DDIT4, DMTN, DSTN, EIF5A, FAM21C, GSPT1, KIF24, MRPL42, MRPL52, MRPS26, MRPS36, NAPB, NCAPG, RDX, RPL10, RPL13, RPL15, RPL18, RPL23A, RPL31, RPL34, RPL37A, RPL5, RPL7, RPS10, RPS11, RPS12, RPS15, RPS16, RPS21, RPS5, RPS8, SMARCC2, SMARCD2, STMN1, VIL1]
GO:0051168	nuclear export	GO_BiologicalProcess-GOA_09.02.2016_16h18	0.00031	0.0022	[7]	15.0943	24	[ALKBH5, BARD1, CPSF1, CSE1L, DHX38, EIF4E, EIF5A, EIF6, HHEX, IWS1, NUP107, NUP155, NXF1, RAN, RPS15, SRSF3, SRSF4, SRSF7, SUPT6H, THOC1, TSC1, UHMK1, UPF2, XPO7]
GO:0031570	DNA integrity checkpoint	GO_BiologicalProcess-GOA_09.02.2016_16h18	0.00033	0.0023	[5, 6]	14.5251	26	[BRCA1, BRIP1, CCNA2, CCND1, CDK1, CDKN1A, CDT1, DTL, E2F1, FANCI, FOXO4, GDNF, GIGYF2, MDC1, MSH2, NEK6, PSMA3, PSMA5, PSMA7, PSMB4, PSMC5, PSME3, SYF2, THOC1, UBC, WAC]
GO:0000077	DNA damage checkpoint	GO_BiologicalProcess-GOA_09.02.2016_16h18	0.00032	0.0023	[5, 6, 7]	14.7929	25	[BRCA1, BRIP1, CCNA2, CCND1, CDK1, CDKN1A, DTL, E2F1, FANCI, FOXO4, GDNF, GIGYF2, MDC1, MSH2, NEK6, PSMA3, PSMA5, PSMA7, PSMB4, PSMC5, PSME3, SYF2, THOC1, UBC, WAC]
GO:0032984	macromolecular complex disassembly	GO_BiologicalProcess-GOA_09.02.2016_16h18	0.00031	0.0023	[4]	12.2449	42	[ADD1, AURKAIP1, BNIP3, CAPZB, CFL2, DDIT4, DMTN, DSTN, EIF5A, FAM21C, GSPT1, KIF24, MRPL42, MRPL52, MRPS26, MRPS36, NAPB, NCAPG, RDX, RPL10, RPL13, RPL15, RPL18, RPL23A, RPL31, RPL34, RPL37A, RPL5, RPL7, RPS10, RPS11, RPS12, RPS15, RPS16, RPS21, RPS5, RPS8, SMARCC2, SMARCD2, STMN1, TFIP11, VIL1]
GO:1901701	cellular response to oxygen-containing compound	GO_BiologicalProcess-GOA_09.02.2016_16h18	0.00031	0.0023	[4]	9.67185	112	[ABCA1, ABL1, AHSG, AKR1C1, AKR1C2, AKT1, AKT1S1, APOC3, APP, APRT, ARRB1, ATP6V0E1, B2M, BCL2L1, BNIP3, BRAF, BRCA1, BUD31, CAB39, CCNA2, CD40, CDK1, COL4A6, CPS1, CXCL16, CYP21A2, DAB2IP, DMTN, E2F1, ECT2, EDN1, EGR1, EIF4B, EIF4E, EIF4G1, ERRFI1, EZR, FOXA2, FOXO4, GFI1, GNAI1, GOT1, GPLD1, HIF1A, HMGCR, HNRNPK, HSPH1, ID1, IGFBP1, IL1R1, JAK2, KLF4, LITAF, LRRK2, LYN, MARK3, MAX, MBD4, MED1, …
GO:0034384	high-density lipoprotein particle clearance	GO_BiologicalProcess-GOA_09.02.2016_16h18	0.00031	0.0023	[4, 5]	50	5	[APOA2, APOC3, APOM, GPLD1, SCARB1]
GO:0030010	establishment of cell polarity	GO_BiologicalProcess-GOA_09.02.2016_16h18	0.00032	0.0023	[4]	16.8142	19	[ARHGEF11, CDH5, DOCK7, EZR, FERMT1, GBF1, GOLPH3, MAP1B, MYO18A, MYO9B, NDEL1, NUMA1, PRKCI, PTGES2, RACK1, SIPA1L3, SLC6A4, SPDL1, SPRY1]
GO:0072657	protein localization to membrane	GO_BiologicalProcess-GOA_09.02.2016_16h18	0.00034	0.0024	[4, 5]	11.1324	58	[ACSL3, AKT1, ANK2, ARFRP1, ARL4D, BCL2L1, BRAF, CHMP4B, DLG1, DMTN, DNAJA3, E2F1, EMP2, EZR, GOLPH3, HSPA4, IKBKB, LIN7C, LRP4, LYPLA1, LYPLAL1, MIEF1, MPP2, NUMB, OXA1L, PRKCI, RAB11A, RAB29, RAB8A, RACK1, RDX, RELN, RILPL2, RPL10, RPL13, RPL15, RPL18, RPL23A, RPL31, RPL34, RPL37A, RPL5, RPL7, RPS10, RPS11, RPS12, RPS15, RPS16, RPS21, RPS5, RPS8, SPCS3, SRP14, TSPAN14, VAMP8, VIL1, YWHAH, ZFYVE…
GO:0071827	plasma lipoprotein particle organization	GO_BiologicalProcess-GOA_09.02.2016_16h18	0.00034	0.0024	[3, 5]	25	10	[ABCA1, ACSL3, APOA2, APOC1, APOC3, APOM, ARF1, MTTP, PLAGL2, SCARB1]
GO:0030968	endoplasmic reticulum unfolded protein response	GO_BiologicalProcess-GOA_09.02.2016_16h18	0.00035	0.0024	[4, 5, 6, 7]	15.9091	21	[ADD1, BFAR, CCND1, CREB3L3, CUL7, DAB2IP, DNAJB11, EIF2AK3, EP300, ERO1A, HDGF, HYOU1, IGFBP1, MBTPS1, MBTPS2, NFE2L2, POMT2, PPP1R15A, RACK1, WIPI1, ZBTB17]
GO:0009060	aerobic respiration	GO_BiologicalProcess-GOA_09.02.2016_16h18	0.00036	0.0025	[5, 6]	19.7183	14	[ADSL, BNIP3, COX20, DHTKD1, DLST, HIF1A, MDH1, MTFR2, OGDH, OXA1L, PDHB, PMPCB, SUCLG2, UQCRC1]
GO:0070373	negative regulation of ERK1 and ERK2 cascade	GO_BiologicalProcess-GOA_09.02.2016_16h18	0.00036	0.0025	[6, 7, 8, 9, 10, 11, 12]	21.8182	12	[ABL1, ARRB1, C3orf33, DAB2IP, DLG1, DUSP1, ERRFI1, EZR, KLF4, LYN, SPRY1, TNIP1]
GO:1902591	single-organism membrane budding	GO_BiologicalProcess-GOA_09.02.2016_16h18	0.00038	0.0026	[4, 5, 6]	18.1818	16	[ARF1, CNIH1, COPZ1, F5, GBF1, GOLPH3, MYO18A, PPP6R3, PRKCI, PTGES2, RAB1B, SEC24C, SNX3, TBC1D20, TFG, TRAPPC4]
GO:0060627	regulation of vesicle-mediated transport	GO_BiologicalProcess-GOA_09.02.2016_16h18	0.00037	0.0026	[3, 4, 5]	11.5473	50	[ABL1, ACSL3, AHSG, AP1G1, APOC1, APOC3, ARF1, ARRB1, B2M, BRAF, C3, CBL, DKK1, EZR, GPC3, HNRNPK, ITGAV, KIF3A, LAMP1, LRRK2, LYN, LYPLA1, LYPLAL1, MERTK, NAPB, NDRG4, NEDD4L, NRP1, PLCB1, PPARG, PPT1, PTAFR, RAB11A, RAB15, RAB3B, RAB9A, RACK1, RDX, SCARB1, SDC1, SLC11A1, SNX3, SORL1, SPINK1, SYT7, SYTL4, TBC1D20, TFR2, VAMP8, WASL]
GO:0009266	response to temperature stimulus	GO_BiologicalProcess-GOA_09.02.2016_16h18	0.00038	0.0026	[3]	13.1474	33	[ACADM, ACOT11, AKT1, AKT1S1, BAG1, C8orf4, CDKN1A, CREBBP, DNAJA3, DNAJB1, EIF2AK3, EIF2B2, EIF2B3, EIF2B4, EP300, ERO1A, FKBPL, HSPH1, IL1R1, LRP11, LYN, NUP107, NUP155, NUP210, NUP37, NUP58, PAWR, PDCD6, PLAC8, PPARG, PTGES3, RPS6KB1, SOD2]
GO:0016053	organic acid biosynthetic process	GO_BiologicalProcess-GOA_09.02.2016_16h18	0.0004	0.0027	[4, 5]	12.2024	41	[ABAT, ACADM, ACLY, ACSL3, ACSS1, ADI1, ADSL, AKR1D1, APOC1, APOC3, ATPIF1, BRCA1, CPS1, CYP21A2, EDN1, EIF2B2, EIF2B4, ELOVL6, ENOPH1, ERLIN1, GATM, GGT1, GOT1, GSTO1, HSD17B8, MGST2, MIF, MSMO1, MTHFD1, MTR, NDUFAB1, PECR, PIBF1, PRKAB1, PSAT1, PTGES2, PTGES3, SEPHS2, SLC6A4, TRIB3, UGP2]
GO:0046394	carboxylic acid biosynthetic process	GO_BiologicalProcess-GOA_09.02.2016_16h18	0.0004	0.0027	[5, 6, 7]	12.2024	41	[ABAT, ACADM, ACLY, ACSL3, ACSS1, ADI1, ADSL, AKR1D1, APOC1, APOC3, ATPIF1, BRCA1, CPS1, CYP21A2, EDN1, EIF2B2, EIF2B4, ELOVL6, ENOPH1, ERLIN1, GATM, GGT1, GOT1, GSTO1, HSD17B8, MGST2, MIF, MSMO1, MTHFD1, MTR, NDUFAB1, PECR, PIBF1, PRKAB1, PSAT1, PTGES2, PTGES3, SEPHS2, SLC6A4, TRIB3, UGP2]
GO:0006639	acylglycerol metabolic process	GO_BiologicalProcess-GOA_09.02.2016_16h18	0.00039	0.0027	[5, 6]	14.6199	25	[ACLY, ACOT11, ACSL1, ACSL3, ACSL4, AGPAT1, APOA2, APOC1, APOC3, C3, CPS1, CTDNEP1, CYP21A2, ELOVL6, G6PC, GPD1L, GPLD1, LPCAT1, MOGAT2, MTTP, PPT1, SCARB1, SLC25A1, SLC37A4, THEM4]
GO:0048194	Golgi vesicle budding	GO_BiologicalProcess-GOA_09.02.2016_16h18	0.0004	0.0027	[4, 5, 6, 7]	33.3333	7	[ARF1, COPZ1, GBF1, GOLPH3, MYO18A, PRKCI, PTGES2]
GO:1901615	organic hydroxy compound metabolic process	GO_BiologicalProcess-GOA_09.02.2016_16h18	0.00039	0.0027	[3]	10.7616	65	[ABAT, ABCA1, ACADM, ACLY, ACSL3, ACSS1, ADH4, ADH5, AKR1B10, AKR1C1, AKR1D1, ALDH3B1, ALDH7A1, APOA2, APOC1, APOC3, APOF, APP, CHDH, CYP19A1, CYP21A2, CYP4F12, CYP4F2, DDC, DIDO1, DMGDH, ENPP7, ERLIN1, FDPS, GFI1, GOT1, GPLD1, HIF1A, HMGCR, HPN, IMPAD1, INPP1, IP6K2, LBR, LPCAT1, MBD4, MBTPS1, MBTPS2, MED1, MOGAT2, MSMO1, MVD, MVK, NCOA1, NFKB1, PECR, PLCB1, PNPLA6, PPIP5K2, PSAT1, PTAFR, RETSAT…
GO:0006511	ubiquitin-dependent protein catabolic process	GO_BiologicalProcess-GOA_09.02.2016_16h18	0.00039	0.0027	[7, 8, 9]	10.8434	63	[AKT1, ANAPC10, ARIH2, ARRB1, ASB2, AXIN1, BFAR, CBL, CCDC47, CDK1, CUL7, CYLD, DAB2IP, DDB1, DNAJB2, DTL, DUSP1, ERLIN1, GAN, HECTD4, HUWE1, KLHL42, LRRK2, MVB12B, NEDD4L, NFE2L2, PBK, PSEN1, PSMA3, PSMA5, PSMA7, PSMB4, PSMC5, PSME3, PSMG2, RACK1, RAD23B, RBBP6, RNF11, RNF6, RNF7, RNF8, SIAH2, TNFAIP1, TNFAIP3, TOPORS, TRIB3, TRIM25, TRPC4AP, TTK, UBAP1, UBC, UBE2C, UBE2D2, UBE2J2, UBE2L3, UFL1,…
GO:0048002	antigen processing and presentation of peptide antigen	GO_BiologicalProcess-GOA_09.02.2016_16h18	0.0004	0.0027	[3]	13.9303	28	[ABCB1, ACTR1B, AP1G1, AP1S2, ARF1, AZGP1, B2M, BLMH, CTSL, CTSV, DCTN6, DYNC1H1, HLA-A, ITGAV, KIF23, KIF3A, KIF3C, KIF5A, PDIA3, PSMA3, PSMA5, PSMA7, PSMB4, PSMC5, PSME3, SEC24C, SLC11A1, UBC]
GO:0048025	negative regulation of mRNA splicing, via spliceosome	GO_BiologicalProcess-GOA_09.02.2016_16h18	0.0004	0.0027	[6, 7, 8, 9, 10, 11, 12, 13]	33.3333	7	[ACIN1, HNRNPK, PTBP1, RBM10, SFSWAP, SRSF4, SRSF7]
GO:0006638	neutral lipid metabolic process	GO_BiologicalProcess-GOA_09.02.2016_16h18	0.00042	0.0029	[4, 5]	14.5349	25	[ACLY, ACOT11, ACSL1, ACSL3, ACSL4, AGPAT1, APOA2, APOC1, APOC3, C3, CPS1, CTDNEP1, CYP21A2, ELOVL6, G6PC, GPD1L, GPLD1, LPCAT1, MOGAT2, MTTP, PPT1, SCARB1, SLC25A1, SLC37A4, THEM4]
GO:0051656	establishment of organelle localization	GO_BiologicalProcess-GOA_09.02.2016_16h18	0.00044	0.0029	[3, 4]	11.8919	44	[AP1S2, ARF1, ARL4D, BLOC1S6, BRAF, CDC42BPA, CHMP4B, CNIH1, COPZ1, DLG1, DPYSL2, DYNC1H1, EIF6, EZR, F5, GBF1, HIF1A, KIF3A, LRRK2, MAP1B, MLH1, MYH10, NAPB, NDEL1, NUMA1, NUSAP1, PIBF1, PPP6R3, PSEN1, PTGES2, RAB11A, RAB1B, RAN, RPS15, SEC24C, SLC6A4, SPDL1, SPRY1, SUN2, TFG, TRAPPC4, WASL, WIPI1, YKT6]
GO:0010628	positive regulation of gene expression	GO_BiologicalProcess-GOA_09.02.2016_16h18	0.00043	0.0029	[4, 5, 6]	8.993	167	[ABCF1, ACTA2, ACTB, AFF1, AKT1, ANK2, APP, ARHGEF11, ARID1B, ARNTL2, ARRB1, ASXL1, ASXL2, ATAD2, AXIN1, BACH1, BAG1, BAZ1B, BMP4, BPTF, BRAF, BRCA1, BRIP1, BUD31, C3, CASK, CCNA2, CD40, CDK1, CEBPG, CEP290, CHCHD2, CHD8, CLSTN1, COQ7, CREB3L3, CREBBP, CRTC2, DAB2IP, DAZAP1, DDRGK1, DDX3X, DDX5, DDX58, DHX33, E2F1, EDN1, EGR1, EIF2AK3, EIF5A, EP300, EPRS, ERCC2, ERLIN1, EZR, FHL2, FOXA2, FOXO4, F…
GO:0033673	negative regulation of kinase activity	GO_BiologicalProcess-GOA_09.02.2016_16h18	0.00046	0.003	[5, 6, 7, 8, 9]	12.8788	34	[ABL1, AKT1, AKT1S1, BMP4, CAMK2N1, CDKN1A, DAB2IP, DNAJA3, DUSP1, DUSP10, DUSP14, EPHA1, ERRFI1, FOXA2, GMFB, GPRC5A, HHEX, HMGCR, LYN, PDCD4, PPP2R1A, PRDX3, PSEN1, RACK1, SOCS7, SORL1, SPRED2, SPRY1, STK38, TNFAIP3, TRIB3, UBASH3B, UBE2C, ZGPAT]
GO:0042592	homeostatic process	GO_BiologicalProcess-GOA_09.02.2016_16h18	0.00045	0.003	[3]	9.08558	155	[ABAT, ABCA1, ABCG5, ABL1, ACAD9, ACADM, ACADS, ACIN1, ACTB, ADD1, ADNP, AKR1C1, AKT1, ALPK3, ANK2, ANKRD11, ANXA7, APOA2, APOC3, APOM, APP, ARF1, ARRB1, ARRDC3, ATP1A1, ATP6V0E1, ATPIF1, AZGP1, B2M, BARD1, BMP4, BUD31, CALB2, CCDC47, CCDC6, CCT2, CD40, CEBPG, CEP290, CFL2, CHMP4B, CLIC4, CLSTN1, CPS1, CREBBP, CRTC2, CRY2, CTSK, CYP21A2, CYP4F12, CYP4F2, DDB1, DKC1, DMTN, DNAJA3, EDN1, ERCC2, ERO…
GO:0006066	alcohol metabolic process	GO_BiologicalProcess-GOA_09.02.2016_16h18	0.00046	0.0031	[4]	11.5023	49	[ABCA1, ACLY, ACSL3, ACSS1, ADH4, ADH5, AKR1B10, AKR1D1, ALDH3B1, ALDH7A1, APOA2, APOC1, APOC3, APOF, APP, CHDH, CYP19A1, CYP21A2, DMGDH, ENPP7, ERLIN1, FDPS, GFI1, GOT1, GPLD1, HMGCR, IMPAD1, INPP1, IP6K2, LBR, LPCAT1, MBTPS1, MBTPS2, MOGAT2, MSMO1, MVD, MVK, NFKB1, PECR, PLCB1, PNPLA6, PPIP5K2, PTAFR, RETSAT, SCARB1, SLC44A2, SORL1, TTR, VDAC2]
GO:0045787	positive regulation of cell cycle	GO_BiologicalProcess-GOA_09.02.2016_16h18	0.00046	0.0031	[3, 4, 5]	11.9444	43	[ABL1, AKT1, APP, BRCA1, CCND1, CDK1, CDKN1A, CREBBP, DAB2IP, DDX3X, ECT2, EDN1, EIF4E, FOXO4, GDPD5, HCFC1, KIF23, MBD4, MCM2, MED1, MIF, NUSAP1, PIWIL2, PLCB1, PSMA3, PSMA5, PSMA7, PSMB4, PSMC5, PSME3, RAB11A, RAD51B, RDX, RPS6KB1, SFPQ, SLC6A4, SSTR5, STIL, STXBP4, TCF3, UBC, UBE2C, UHRF2]
GO:0007005	mitochondrion organization	GO_BiologicalProcess-GOA_09.02.2016_16h18	0.00046	0.0031	[4]	10.1887	81	[ACAD9, ACIN1, AKT1, ARIH2, ASB2, ATG2B, ATG9A, ATPAF1, ATPIF1, AURKAIP1, BCL2L1, BNIP3, CHCHD2, CHCHD6, COQ7, COX20, CTSK, DHODH, DNAJA3, DNAJB11, DTD1, E2F1, EVA1B, FAM13B, FUNDC1, GDNF, GOLPH3, HCFC1, HIF1A, HSPA4, HUWE1, LRRK2, MAP1LC3B, MCL1, MDH1, MEX3C, MIEF1, MRPL42, MRPL52, MRPS26, MRPS36, MTFR2, MYLK, NDUFA10, NDUFA8, NDUFAB1, NDUFAF3, NDUFB5, NOL3, NR2C2, NSUN4, NUBPL, OXA1L, PDK1, PLA…
GO:1903322	positive regulation of protein modification by small protein conjugation or removal	GO_BiologicalProcess-GOA_09.02.2016_16h18	0.00047	0.0031	[6, 7, 8, 9]	13.7931	28	[ANAPC10, ARRB1, ARRDC3, AXIN1, BRCA1, CDK1, DCUN1D2, DNAJA3, DNAJB2, FANCI, LRRK2, MIA3, PAXIP1, PIAS4, PSMA3, PSMA5, PSMA7, PSMB4, PSMC5, PSME3, SENP2, SEPT4, TBC1D7, TOPORS, TRIB3, UBC, UBE2C, UBE2L3]
GO:0051340	regulation of ligase activity	GO_BiologicalProcess-GOA_09.02.2016_16h18	0.00046	0.0031	[4, 5]	15.2778	22	[ABL1, ANAPC10, ARRDC3, AXIN1, CDK1, DCUN1D2, DUSP1, PSEN1, PSMA3, PSMA5, PSMA7, PSMB4, PSMC5, PSME3, PSMG2, TFIP11, TOPORS, TRIB3, TTK, UBC, UBE2C, UBE2L3]
GO:0034620	cellular response to unfolded protein	GO_BiologicalProcess-GOA_09.02.2016_16h18	0.00048	0.0031	[5, 6]	15.5556	21	[ADD1, BFAR, CCND1, CREB3L3, CUL7, DAB2IP, DNAJB11, EIF2AK3, EP300, ERO1A, HDGF, HYOU1, IGFBP1, MBTPS1, MBTPS2, NFE2L2, POMT2, PPP1R15A, RACK1, WIPI1, ZBTB17]
GO:0043632	modification-dependent macromolecule catabolic process	GO_BiologicalProcess-GOA_09.02.2016_16h18	0.00048	0.0032	[5, 6]	10.7203	64	[AKT1, ANAPC10, ARIH2, ARRB1, ASB2, AXIN1, BFAR, CBL, CCDC47, CDK1, CUL7, CYLD, DAB2IP, DDB1, DNAJB2, DTL, DUSP1, ERLIN1, EXOSC7, GAN, HECTD4, HUWE1, KLHL42, LRRK2, MVB12B, NEDD4L, NFE2L2, PBK, PSEN1, PSMA3, PSMA5, PSMA7, PSMB4, PSMC5, PSME3, PSMG2, RACK1, RAD23B, RBBP6, RNF11, RNF6, RNF7, RNF8, SIAH2, TNFAIP1, TNFAIP3, TOPORS, TRIB3, TRIM25, TRPC4AP, TTK, UBAP1, UBC, UBE2C, UBE2D2, UBE2J2, UBE2L…
GO:0008631	intrinsic apoptotic signaling pathway in response to oxidative stress	GO_BiologicalProcess-GOA_09.02.2016_16h18	0.00048	0.0032	[5, 6, 7, 8]	22.449	11	[AKT1, HIF1A, HSPH1, JAK2, MCL1, NFE2L2, NOL3, P4HB, PDK1, SFPQ, SOD2]
GO:0051262	protein tetramerization	GO_BiologicalProcess-GOA_09.02.2016_16h18	0.00049	0.0032	[6, 7]	15.873	20	[ACADM, ACADS, ADSL, ATPIF1, CPSF6, CPSF7, CRTC2, DECR1, GNMT, GPX3, HMGCR, LRP4, NUDT21, NUP58, OXA1L, PFKL, RRM1, RRM2, SOD2, VASP]
GO:0042398	cellular modified amino acid biosynthetic process	GO_BiologicalProcess-GOA_09.02.2016_16h18	0.00051	0.0033	[4, 5]	21.0526	12	[ALDH7A1, ATPIF1, CHDH, CPS1, CYP21A2, GATM, GGT1, MAT1A, MGST2, MTHFD1, NFE2L2, SEPHS2]
GO:0044773	mitotic DNA damage checkpoint	GO_BiologicalProcess-GOA_09.02.2016_16h18	0.00051	0.0033	[5, 6, 7, 8, 9]	16.6667	18	[CCNA2, CCND1, CDK1, CDKN1A, FANCI, FOXO4, GDNF, GIGYF2, MDC1, MSH2, PSMA3, PSMA5, PSMA7, PSMB4, PSMC5, PSME3, SYF2, UBC]
GO:0043484	regulation of RNA splicing	GO_BiologicalProcess-GOA_09.02.2016_16h18	0.0005	0.0033	[5, 6, 7, 8, 9]	17.1717	17	[ACIN1, CDK12, COQ7, DAZAP1, DDX5, ESRP2, HNRNPH1, HNRNPK, MBNL1, PTBP1, RBM10, RBM25, SFSWAP, SON, SRSF4, SRSF7, UHMK1]
GO:1901698	response to nitrogen compound	GO_BiologicalProcess-GOA_09.02.2016_16h18	0.00051	0.0033	[3]	9.59507	109	[ABAT, ABL1, AHSG, AKT1, AKT1S1, APOC3, APP, APRT, ATP6V0E1, BCL2L1, BMP4, BRAF, BRCA1, C12orf76, CAB39, CCNA2, CCND1, CDK1, CDKN1A, CHRNA2, COL4A6, CPS1, CRY2, CYC1, CYP21A2, DAB2IP, DDC, DDX58, DHODH, DMTN, DPYSL2, DUSP1, EDN1, EGR1, EIF2B2, EIF2B3, EIF2B4, EIF4B, EIF4E, EIF4G1, ERRFI1, EZR, FOXO4, GNAI1, GNAI2, GOT1, GPLD1, HADH, HHEX, HIF1A, HNRNPK, ID1, IGFBP1, IL1R1, JAK2, KHK, KLF4, LRRK2,…
GO:0009790	embryo development	GO_BiologicalProcess-GOA_09.02.2016_16h18	0.00051	0.0033	[3, 4]	9.65961	105	[ACSL4, ADD1, AKT1, ANKRD11, ARFRP1, ARHGAP35, ASXL2, AXIN1, BCL2L1, BMP4, BNIP2, BPTF, BRCA1, CCNB1IP1, CDK1, CEP290, CHD8, CNOT3, COQ7, CREBBP, CTHRC1, DDX5, DKK1, DLC1, DLG1, DSCAML1, DUSP1, EDN1, EFNA1, EHMT1, EP300, ERCC2, FOXA2, FRAS1, GDNF, GFI1, GINS1, GPC3, HHEX, HIF1A, HPN, ID3, IFT52, IL1RN, IMPAD1, ITGAV, KAT6A, KIAA1715, KIF3A, KLF4, KMT2D, LDB1, LRP4, MBD4, MBNL1, MED1, MIA3, MMP15,…
GO:0030522	intracellular receptor signaling pathway	GO_BiologicalProcess-GOA_09.02.2016_16h18	0.00052	0.0033	[4, 5]	12.2257	39	[APP, ASXL1, ASXL2, BCL2L1, BRCA1, BUD31, CRY2, CYLD, DDRGK1, DDX5, DDX58, EP300, FHL2, FKBPL, IKBKB, JAK2, KMT2D, MBD4, MED1, MED17, MIA3, NCOA1, NCOA4, NR1I2, PANX1, PLPP1, PPARG, PTGES3, RAN, RNF6, SAFB, SEC14L1, STARD10, STAT3, THRB, TNFAIP3, UBC, UFL1, YWHAH]
GO:0051348	negative regulation of transferase activity	GO_BiologicalProcess-GOA_09.02.2016_16h18	0.00052	0.0033	[4, 5, 6]	11.7188	45	[ABL1, AKT1, AKT1S1, ANAPC10, BMP4, CAMK2N1, CDKN1A, DAB2IP, DNAJA3, DUSP1, DUSP10, DUSP14, EPHA1, ERRFI1, FOXA2, GMFB, GPRC5A, HHEX, HMGCR, LYN, PDCD4, PPARG, PPP2R1A, PRDX3, PSEN1, PSMA3, PSMA5, PSMA7, PSMB4, PSMC5, PSME3, PSMG2, RACK1, SOCS7, SORL1, SPRED2, SPRY1, STK38, TNFAIP3, TRIB3, TTK, UBASH3B, UBC, UBE2C, ZGPAT]
GO:0006469	negative regulation of protein kinase activity	GO_BiologicalProcess-GOA_09.02.2016_16h18	0.00052	0.0033	[6, 7, 8, 9, 10]	13.0612	32	[ABL1, AKT1, AKT1S1, BMP4, CAMK2N1, CDKN1A, DAB2IP, DNAJA3, DUSP1, DUSP10, DUSP14, EPHA1, ERRFI1, GMFB, GPRC5A, HHEX, HMGCR, LYN, PDCD4, PPP2R1A, PSEN1, RACK1, SOCS7, SORL1, SPRED2, SPRY1, STK38, TNFAIP3, TRIB3, UBASH3B, UBE2C, ZGPAT]
GO:0006576	cellular biogenic amine metabolic process	GO_BiologicalProcess-GOA_09.02.2016_16h18	0.00051	0.0033	[5, 6]	13.5514	29	[ACSL3, ADI1, ADSL, ALDH7A1, APOA2, APOC1, AZIN1, CHDH, CPS1, CYP21A2, DDC, DMGDH, ENOPH1, ENPP7, GATM, GOT1, GPLD1, LPCAT1, NQO1, PNPLA6, PSMA3, PSMA5, PSMA7, PSMB4, PSMC5, PSME3, SCARB1, SLC44A2, TINAGL1]
GO:0035966	response to topologically incorrect protein	GO_BiologicalProcess-GOA_09.02.2016_16h18	0.00051	0.0033	[3, 4]	14.1304	26	[ADD1, BFAR, CCND1, CREB3L3, CUL7, DAB2IP, DNAJB1, DNAJB11, DNAJB2, EIF2AK3, EP300, ERO1A, HDGF, HSPA4, HSPH1, HYOU1, IGFBP1, MBTPS1, MBTPS2, NFE2L2, POMT2, PPP1R15A, RACK1, UBE2J2, WIPI1, ZBTB17]
GO:0034976	response to endoplasmic reticulum stress	GO_BiologicalProcess-GOA_09.02.2016_16h18	0.00052	0.0033	[4]	12.782	34	[ADD1, BFAR, CCDC47, CCND1, CREB3L3, CUL7, DAB2IP, DDRGK1, DNAJB11, DNAJB2, EIF2AK3, EP300, ERLIN1, ERO1A, HDGF, HYOU1, IGFBP1, LRRK2, MBTPS1, MBTPS2, NFE2L2, P4HB, PDIA3, POMT2, PPP1R15A, PSMC5, RACK1, SERINC3, TRIB3, TRIM25, UBE2J2, UFL1, WIPI1, ZBTB17]
GO:0036294	cellular response to decreased oxygen levels	GO_BiologicalProcess-GOA_09.02.2016_16h18	0.00052	0.0033	[5]	14.8387	23	[AKT1, BACH1, BNIP3, BRIP1, CA9, CCNA2, CHCHD2, CREBBP, E2F1, EDN1, EGR1, EP300, ERO1A, HIF1A, HYOU1, MIA3, P4HB, PDK1, PPP1R15A, SLC29A1, TSC1, UBC, UBE2D2]
GO:0019509	L-methionine biosynthetic process from methylthioadenosine	GO_BiologicalProcess-GOA_09.02.2016_16h18	0.00055	0.0034	[7, 8, 9, 10, 11, 12, 13, 14]	45.4545	5	[ADI1, EIF2B2, EIF2B4, ENOPH1, GOT1]
GO:0034599	cellular response to oxidative stress	GO_BiologicalProcess-GOA_09.02.2016_16h18	0.00054	0.0034	[4]	12.8906	33	[ABL1, AKT1, ALDH3B1, BMP4, BNIP3, CCNA2, CDK1, COQ7, DLC1, ECT2, HIF1A, HSPH1, JAK2, KLF4, LRRK2, MCL1, MGMT, MIA3, MTR, NFE2L2, NOL3, NQO1, OSER1, P4HB, PDK1, PRDX3, RACK1, SFPQ, SLC11A2, SOD2, TINAGL1, TMEM161A, TNFAIP3]
GO:0051960	regulation of nervous system development	GO_BiologicalProcess-GOA_09.02.2016_16h18	0.00054	0.0034	[4, 5, 6]	10.111	82	[ABL1, ADNP, AKT1, APP, ARF1, ARHGAP35, BMP4, BNIP2, BRAF, BUD31, CDK1, CLSTN1, CLSTN3, CUL7, DAB2IP, DBN1, DKK1, DLG1, DOCK7, DPYSL2, DUSP10, ECT2, EFNA1, EIF2AK3, EIF4E, EIF4G1, FKBPL, FOXA2, GDF11, GDNF, GDPD5, GFI1, HIF1A, HNRNPK, ID1, IKBKB, KLF4, L1CAM, LRP4, LRRK2, LSM1, LYN, MAP1B, MBD4, MED1, MOB2, NCKIPSD, NCMAP, NCOA1, NDEL1, NDRG4, NEDD4L, NGEF, NREP, NRP1, NSMF, NUMB, PPARG, PPP3CA, …
GO:0042493	response to drug	GO_BiologicalProcess-GOA_09.02.2016_16h18	0.00056	0.0035	[3]	11.0664	55	[ABAT, ABCA1, ABCA3, ABCB1, ABCG5, ACADM, ACSL1, ADD3, APOA2, APOC3, ARRB1, ATP1A1, B2M, BLMH, BRAF, CA9, CCND1, CDK1, CDKN1A, COQ7, CPS1, CYP21A2, DDC, DHODH, DPYSL2, EDN1, GNAI2, GPLD1, HADH, HIF1A, IKBKB, LOX, LYN, MCM7, MGMT, MYCBP2, NCOA1, NDUFA10, NFE2L2, NR1I2, PDE7A, PFAS, PPARG, PPP1R15A, PPP3CA, RPS6KB1, SLC47A1, SLC6A4, SOD2, SRP14, STAT3, TCF3, TFRC, TINAGL1, VDAC2]
GO:0019941	modification-dependent protein catabolic process	GO_BiologicalProcess-GOA_09.02.2016_16h18	0.00057	0.0035	[6, 7, 8]	10.6961	63	[AKT1, ANAPC10, ARIH2, ARRB1, ASB2, AXIN1, BFAR, CBL, CCDC47, CDK1, CUL7, CYLD, DAB2IP, DDB1, DNAJB2, DTL, DUSP1, ERLIN1, GAN, HECTD4, HUWE1, KLHL42, LRRK2, MVB12B, NEDD4L, NFE2L2, PBK, PSEN1, PSMA3, PSMA5, PSMA7, PSMB4, PSMC5, PSME3, PSMG2, RACK1, RAD23B, RBBP6, RNF11, RNF6, RNF7, RNF8, SIAH2, TNFAIP1, TNFAIP3, TOPORS, TRIB3, TRIM25, TRPC4AP, TTK, UBAP1, UBC, UBE2C, UBE2D2, UBE2J2, UBE2L3, UFL1,…
GO:0009749	response to glucose	GO_BiologicalProcess-GOA_09.02.2016_16h18	0.00055	0.0035	[7]	13.6585	28	[APOA2, APOC3, APOM, ARRB1, CTSV, EGR1, EIF2B2, EIF2B3, EIF2B4, FOXA2, GNAI2, GPLD1, HHEX, HIF1A, HMGCR, HNRNPK, IL1R1, KHK, NUCB2, PFKL, PIM3, PPP3CA, RACK1, RPS6KB1, SLC29A1, SLC2A2, SLC37A4, STXBP4]
GO:0009314	response to radiation	GO_BiologicalProcess-GOA_09.02.2016_16h18	0.00058	0.0036	[3]	10.8108	60	[ABCG5, AKR1B10, AKR1C1, AKT1, AP1S2, APOA2, APOC3, APOM, APP, ARRB1, BCL2L1, BRAF, BRCA1, CACNA2D4, CCND1, CDC25A, CDKN1A, CREBBP, CRY2, DCDC2, DDB1, DTL, DUSP1, E2F1, ECT2, EGR1, EP300, ERCC2, FKBPL, GPC3, HIF1A, HMGCR, IL1R1, KIAA0101, MAP4K3, MAPRE2, MBD4, MGMT, MSH2, NAPEPLD, NDRG4, PAXIP1, PBK, PLEKHB1, POLQ, PPP1R15A, RAD51B, RNF7, RNF8, RRM1, RUVBL2, SDC1, SDF4, SERPINE2, SLC6A4, SOD2, TM…
GO:0006979	response to oxidative stress	GO_BiologicalProcess-GOA_09.02.2016_16h18	0.00059	0.0036	[3]	11.3122	50	[ABL1, AKT1, ALDH3B1, APP, ATAT1, BMP4, BNIP3, CCNA2, CDK1, COQ7, CYGB, DLC1, DUSP1, ECT2, EDN1, ERCC2, ERO1A, GPX2, GPX3, GPX7, HIF1A, HSPH1, IL1R1, JAK2, KLF4, LIG1, LRRK2, MCL1, MGMT, MIA3, MTR, NFE2L2, NFKB1, NOL3, NQO1, OSER1, P4HB, PDK1, PRDX3, PRDX6, PSEN1, RACK1, SDC1, SEPP1, SFPQ, SLC11A2, SOD2, TINAGL1, TMEM161A, TNFAIP3]
GO:0042274	ribosomal small subunit biogenesis	GO_BiologicalProcess-GOA_09.02.2016_16h18	0.00058	0.0036	[4, 5]	22	11	[EMG1, HEATR1, RPS10, RPS15, RPS16, RPS21, RPS5, RPS8, TSR3, UTP4, WDR3]
GO:0060341	regulation of cellular localization	GO_BiologicalProcess-GOA_09.02.2016_16h18	0.0006	0.0037	[3, 4]	9.31953	126	[ABAT, ABL1, ACSL3, AKT1, ANK2, ANXA4, AP1G1, APOA2, ARF1, ARIH2, ARRB1, ASTN2, ATPIF1, AXIN1, BARD1, BCL2L1, BMP4, BRAF, BRCA1, BTN2A2, C8orf4, CACNA1D, CCT2, CD40, CDK1, CDKN1A, CEP290, CRY2, CTSK, CYLD, DAB2IP, DDX58, DKC1, DLG1, DMTN, DPYSL2, E2F1, ECT2, EDN1, EIF2AK3, EZR, FOXA2, GBF1, GDNF, GNAI2, GOLPH3, GPD1L, GPLD1, GSTO1, HADH, HIF1A, HMGCR, HNRNPK, HSPH1, HUWE1, IWS1, JAK2, KPNA1, LAMP…
GO:0007093	mitotic cell cycle checkpoint	GO_BiologicalProcess-GOA_09.02.2016_16h18	0.0006	0.0037	[5, 6, 7]	13.9785	26	[ANAPC10, BCL2L1, CCNA2, CCND1, CDK1, CDKN1A, DLG1, DUSP1, FANCI, FOXO4, GDNF, GIGYF2, MDC1, MSH2, PSMA3, PSMA5, PSMA7, PSMB4, PSMC5, PSME3, PSMG2, SYF2, TTK, UBC, UBE2C, ZWINT]
GO:0043624	cellular protein complex disassembly	GO_BiologicalProcess-GOA_09.02.2016_16h18	0.00061	0.0037	[6]	12.3333	37	[ADD1, AURKAIP1, CAPZB, CFL2, DMTN, DSTN, EIF5A, FAM21C, GSPT1, KIF24, MRPL42, MRPL52, MRPS26, MRPS36, NAPB, NCAPG, RDX, RPL10, RPL13, RPL15, RPL18, RPL23A, RPL31, RPL34, RPL37A, RPL5, RPL7, RPS10, RPS11, RPS12, RPS15, RPS16, RPS21, RPS5, RPS8, STMN1, VIL1]
GO:0051049	regulation of transport	GO_BiologicalProcess-GOA_09.02.2016_16h18	0.00062	0.0037	[3, 4]	8.92571	167	[ABAT, ABCA1, ABCG5, ABL1, ACSL3, ACSL4, AHSG, AKT1, ANK2, ANXA4, AP1G1, APOA2, APOC1, APOC3, ARF1, ARIH2, ARRB1, ATP1A1, ATPIF1, AXIN1, AZIN1, B2M, BARD1, BMP4, BRAF, BRCA1, BTN2A2, C3, C8orf4, CAB39, CACNA1D, CACNA2D4, CASK, CBL, CD40, CDK1, CDKN1A, CEP290, CLIC4, COPS2, CRY2, CTSK, CYLD, CYP4F2, DAB2IP, DDX58, DKK1, DLG1, DMTN, DPYSL2, E2F1, ECT2, EDN1, EZR, FOXA2, GDNF, GNAI2, GOLPH3, GPC3, G…
GO:0006260	DNA replication	GO_BiologicalProcess-GOA_09.02.2016_16h18	0.00061	0.0037	[5, 6, 7]	11.7021	44	[BAZ1A, BMP4, BOD1L1, BRCA1, CCT2, CDC25A, CDK1, CDT1, DKC1, DNAJA3, DTD1, DTL, DUT, ENPP7, ESCO2, GDNF, GINS1, GINS3, HMBOX1, ID3, KIAA0101, KLF4, LIG1, MCM10, MCM2, MCM7, NASP, POLQ, PPARG, PPP2R1A, PRIM1, PRIM2, PTGES3, RBBP6, RBMS1, REPIN1, RFC3, RRM1, RRM2, SENP2, STOML2, TERF2, THOC1, TNFAIP1]
GO:0045732	positive regulation of protein catabolic process	GO_BiologicalProcess-GOA_09.02.2016_16h18	0.00064	0.0038	[4, 5, 6, 7]	12.6394	34	[AKT1, ANAPC10, ARIH2, ATPIF1, AXIN1, BARD1, CDK1, DAB2IP, DDRGK1, DNAJB2, EZR, GPC3, GPLD1, LPCAT1, LRRK2, NEDD4L, NFE2L2, NKD1, PSEN1, PSMA3, PSMA5, PSMA7, PSMB4, PSMC5, PSME3, RACK1, RDX, SORL1, SOX9, TNFAIP3, TRIB3, UBC, UBE2C, UQCC2]
GO:0032879	regulation of localization	GO_BiologicalProcess-GOA_09.02.2016_16h18	0.00064	0.0038	[2, 3]	8.60979	218	[ABAT, ABCA1, ABCG5, ABHD2, ABL1, ACSL3, ACSL4, ADGRG3, AHSG, AKT1, ANK2, ANXA4, AP1G1, APOA2, APOC1, APOC3, ARAP1, ARF1, ARIH2, ARRB1, ASTN2, ATP1A1, ATPIF1, AXIN1, AZIN1, B2M, BARD1, BCL2L1, BMP4, BRAF, BRCA1, BTN2A2, BUD31, C3, C8orf4, CAB39, CACNA1D, CACNA2D4, CAPN7, CASK, CBL, CCT2, CD40, CDK1, CDKN1A, CEP290, CLIC4, CLSTN1, CLSTN3, COPS2, CRY2, CSNK2B, CTSK, CXCL16, CYGB, CYLD, CYP19A1, CYP…
GO:0071825	protein-lipid complex subunit organization	GO_BiologicalProcess-GOA_09.02.2016_16h18	0.00064	0.0039	[4]	23.2558	10	[ABCA1, ACSL3, APOA2, APOC1, APOC3, APOM, ARF1, MTTP, PLAGL2, SCARB1]
GO:0032368	regulation of lipid transport	GO_BiologicalProcess-GOA_09.02.2016_16h18	0.00064	0.0039	[4, 5, 6]	16.8317	17	[ABCA1, ABCG5, ACSL4, AKT1, APOA2, APOC1, APOC3, CRY2, CYP4F2, EDN1, HNRNPK, ITGAV, MIF, NFKB1, NUCB2, PPARG, REPIN1]
GO:0051090	regulation of sequence-specific DNA binding transcription factor activity	GO_BiologicalProcess-GOA_09.02.2016_16h18	0.00065	0.0039	[3, 6, 7, 8, 9, 10, 11]	11.5979	45	[ADGRG3, AKT1, ANXA4, ARRB1, BRMS1L, BUD31, C3orf33, CD40, CEBPG, CRTC2, CYLD, DAB2IP, DAP, DDRGK1, DDX58, DNAJA3, EP300, FOXA2, GDNF, GFI1, ID1, ID3, IKBKB, JAK2, KAT6A, KLF4, MBTPS2, NFKB1, NFKBIB, NFKBID, PIAS4, PLPP3, PPARG, PPP3CA, PRDX3, PRKCI, RELN, RIPK1, TCF3, TNFAIP3, TRIM25, TRIM5, UBC, UFL1, USP7]
GO:0032088	negative regulation of NF-kappaB transcription factor activity	GO_BiologicalProcess-GOA_09.02.2016_16h18	0.00065	0.0039	[5, 7, 8, 9, 10, 11, 12, 13]	18.6667	14	[ANXA4, ARRB1, BRMS1L, CYLD, DAB2IP, DAP, DNAJA3, GFI1, KLF4, NFKBID, PIAS4, TNFAIP3, UFL1, USP7]
GO:0010035	response to inorganic substance	GO_BiologicalProcess-GOA_09.02.2016_16h18	0.00068	0.004	[3]	10.7018	61	[ABAT, ABL1, ACADM, ADNP, ANXA7, APP, ATAT1, B2M, BMP4, BNIP3, BRAF, C3, CCNA2, CCND1, CDK1, CLIC4, CPS1, CYP21A2, DLC1, DMTN, DUSP1, ECT2, EDN1, EIF2AK3, GDNF, GNAI2, GPLD1, HIF1A, HSPH1, IL1R1, KHK, KLF4, LIG1, LRP11, LRRK2, MTR, MTTP, MYCBP2, NEDD4L, NFE2L2, NFKB1, NQO1, OSER1, PAWR, PDCD6, PPARG, PPP1R15A, PPP3CA, PRDX3, RACK1, S100A16, SDC1, SLC11A2, SLC30A10, SLC30A7, SLC6A4, SOD2, TFR2, TF…
GO:0031960	response to corticosteroid	GO_BiologicalProcess-GOA_09.02.2016_16h18	0.00071	0.0042	[5, 6]	13.6364	27	[ABCA3, ACADM, ACADS, APOA2, ATAT1, BMP4, C3, CCND1, CDKN1A, CPS1, CTSV, CYP21A2, DUSP1, EDN1, ERRFI1, GOT1, HIF1A, IL1RN, JAK2, MYCBP2, PFKFB1, PTAFR, RPS6KB1, SDC1, SSTR5, TINAGL1, UBE2L3]
GO:0031398	positive regulation of protein ubiquitination	GO_BiologicalProcess-GOA_09.02.2016_16h18	0.00071	0.0042	[7, 8, 9, 10, 11]	13.8298	26	[ANAPC10, ARRB1, ARRDC3, AXIN1, BRCA1, CDK1, DCUN1D2, DNAJA3, DNAJB2, FANCI, LRRK2, PAXIP1, PSMA3, PSMA5, PSMA7, PSMB4, PSMC5, PSME3, SENP2, SEPT4, TBC1D7, TOPORS, TRIB3, UBC, UBE2C, UBE2L3]
GO:2000347	positive regulation of hepatocyte proliferation	GO_BiologicalProcess-GOA_09.02.2016_16h18	0.00071	0.0042	[3, 4, 5, 6, 7, 8, 9, 10, 11, 12]	57.1429	4	[HPN, MBD4, MED1, TNFAIP3]
GO:0030111	regulation of Wnt signaling pathway	GO_BiologicalProcess-GOA_09.02.2016_16h18	0.00072	0.0042	[4, 5, 6, 7]	11.9403	40	[ABL1, AXIN1, CCND1, CHD8, CSNK1G2, CTDNEP1, CTHRC1, CYLD, DAB2IP, DCDC2, DKK1, EGR1, HHEX, HMGXB4, IGFBP1, IGFBP6, KREMEN1, LRP4, LRRK2, MBD2, NFKB1, NKD1, PLPP3, POU5F1, PPP2R1A, PSMA3, PSMA5, PSMA7, PSMB4, PSMC5, PSME3, RACK1, SENP2, SIAH2, SNX3, SOX9, TMEM198, TRPM4, UBC, ZRANB1]
GO:0009408	response to heat	GO_BiologicalProcess-GOA_09.02.2016_16h18	0.00071	0.0042	[3, 4]	14.0449	25	[AKT1, AKT1S1, BAG1, C8orf4, CDKN1A, CREBBP, DNAJA3, DNAJB1, EIF2B2, EIF2B3, EIF2B4, EP300, FKBPL, HSPH1, IL1R1, LRP11, LYN, NUP107, NUP155, NUP210, NUP37, NUP58, PDCD6, PTGES3, RPS6KB1]
GO:1902946	protein localization to early endosome	GO_BiologicalProcess-GOA_09.02.2016_16h18	0.00071	0.0042	[7]	57.1429	4	[EZR, NRP1, RDX, SORL1]
GO:0051341	regulation of oxidoreductase activity	GO_BiologicalProcess-GOA_09.02.2016_16h18	0.00072	0.0042	[4, 5]	16.6667	17	[ABL1, AKT1, CYGB, DDAH1, DLC1, EDN1, GDNF, GFI1, HIF1A, LRRK2, LYPLA1, NFKB1, OXA1L, SCARB1, TERF2, VDAC2, WASL]
GO:0008610	lipid biosynthetic process	GO_BiologicalProcess-GOA_09.02.2016_16h18	0.00075	0.0043	[4]	10.3048	71	[ACLY, ACOT11, ACSL1, ACSL3, ACSL4, ACSS1, AGPAT1, AKR1D1, AKT1, ALDH3B1, APOA2, APOC1, APOC3, ARF1, ATP1A1, BRCA1, C3, CERS2, CLSTN1, CRLS1, CSNK1G2, CTDNEP1, CYP19A1, CYP21A2, EDN1, ELOVL6, ERLIN1, FAR1, FDPS, GFI1, GGT1, GPAA1, GPD1L, GPLD1, HADHB, HMGCR, HSD17B11, HSD17B8, LBR, LPCAT1, MBD4, MED1, MGST2, MIF, MOGAT2, MSMO1, MTMR6, MVD, MVK, NDUFAB1, NFKB1, PECR, PIBF1, PIGN, PIGO, PIK3C2B, PI…
GO:0045664	regulation of neuron differentiation	GO_BiologicalProcess-GOA_09.02.2016_16h18	0.00074	0.0043	[6, 7, 8, 9]	10.5882	63	[ABL1, ADNP, AKT1, APP, ARF1, ARHGAP35, BMP4, BNIP2, BRAF, BUD31, CUL7, DAB2IP, DBN1, DKK1, DPYSL2, ECT2, EFNA1, EIF4E, EIF4G1, FKBPL, FOXA2, GDF11, GDNF, GDPD5, GFI1, HNRNPK, ID1, IKBKB, KLF4, L1CAM, LRP4, LRRK2, LSM1, LYN, MAP1B, MBD4, MED1, MOB2, NCKIPSD, NCOA1, NDEL1, NDRG4, NEDD4L, NGEF, NREP, NRP1, NSMF, PPP3CA, PRKCI, PSEN1, RAB11A, RAB29, RAC3, RELN, RNF6, SERPINE2, SLC6A4, SNX3, SOX9, TC…
GO:0009199	ribonucleoside triphosphate metabolic process	GO_BiologicalProcess-GOA_09.02.2016_16h18	0.00082	0.0047	[6, 7, 8]	12.5954	33	[AK1, APOC3, ATP5G2, ATP5I, ATPIF1, BPGM, COA6, COQ7, COX5A, DDIT4, DHTKD1, ECD, ENO1, GNAI3, HIF1A, LRRK2, MIA3, MSH2, NDUFA10, NDUFA4, NDUFA8, NDUFAB1, NDUFB5, OGDH, PFKFB1, PFKL, PMPCB, SLC25A25, STAT3, STOML2, UCK2, UQCC2, UQCRC1]
GO:0048024	regulation of mRNA splicing, via spliceosome	GO_BiologicalProcess-GOA_09.02.2016_16h18	0.00083	0.0047	[6, 7, 8, 9, 10, 11, 12]	20	12	[ACIN1, DAZAP1, DDX5, HNRNPK, MBNL1, PTBP1, RBM10, RBM25, SFSWAP, SRSF4, SRSF7, UHMK1]
GO:0009893	positive regulation of metabolic process	GO_BiologicalProcess-GOA_09.02.2016_16h18	0.00081	0.0047	[2, 3, 4]	8.23623	311	[ABAT, ABCA1, ABCF1, ABL1, ACLY, ACSL1, ACSL3, ACTA2, ACTB, ADNP, AFF1, AGPAT1, AKR1B10, AKT1, ANAPC10, ANK2, APH1A, APOA2, APOC1, APOC3, APP, ARAP1, ARF1, ARHGAP11A, ARHGAP35, ARHGEF11, ARHGEF28, ARID1B, ARIH2, ARNTL2, ARRB1, ARRDC3, ASXL1, ASXL2, ATAD2, ATPIF1, AURKAIP1, AXIN1, AZIN1, BACH1, BAG1, BARD1, BAZ1B, BMP4, BNIP2, BNIP3, BPTF, BRAF, BRCA1, BRIP1, BRMS1L, BUD31, C3, CAB39, CASK, CCL16,…
GO:0000086	G2/M transition of mitotic cell cycle	GO_BiologicalProcess-GOA_09.02.2016_16h18	0.00083	0.0047	[5, 6, 7]	13.5	27	[ABCB1, ALMS1, APP, BACH1, BRIP1, CCNA2, CCND1, CDC25A, CDK1, CDKN1A, CEP192, CEP290, CEP57, DYNC1H1, EP300, FANCI, FOXO4, LIN54, NUMA1, PLCB1, PPP2R1A, RAB11A, RAB8A, RAD51B, SYF2, TUBB, UBC]
GO:0009141	nucleoside triphosphate metabolic process	GO_BiologicalProcess-GOA_09.02.2016_16h18	0.00086	0.0048	[5, 6, 7]	12.3239	35	[AK1, APOC3, ATP5G2, ATP5I, ATPIF1, BPGM, CMPK1, COA6, COQ7, COX5A, DDIT4, DHTKD1, DUT, ECD, ENO1, GNAI3, HIF1A, LRRK2, MIA3, MSH2, NDUFA10, NDUFA4, NDUFA8, NDUFAB1, NDUFB5, OGDH, PFKFB1, PFKL, PMPCB, SLC25A25, STAT3, STOML2, UCK2, UQCC2, UQCRC1]
GO:1901661	quinone metabolic process	GO_BiologicalProcess-GOA_09.02.2016_16h18	0.00084	0.0048	[4, 5]	26.6667	8	[ADH4, AKR1B10, AKR1C1, AKR1C2, AKR7A2, COQ7, CYP4F2, HMGCR]
GO:1903364	positive regulation of cellular protein catabolic process	GO_BiologicalProcess-GOA_09.02.2016_16h18	0.00084	0.0048	[5, 6, 7, 8]	13.6842	26	[AKT1, ANAPC10, ARIH2, ATPIF1, AXIN1, CDK1, DAB2IP, DDRGK1, DNAJB2, EZR, LRRK2, NFE2L2, PSEN1, PSMA3, PSMA5, PSMA7, PSMB4, PSMC5, PSME3, RACK1, RDX, TNFAIP3, TRIB3, UBC, UBE2C, UQCC2]
GO:0007163	establishment or maintenance of cell polarity	GO_BiologicalProcess-GOA_09.02.2016_16h18	0.00084	0.0048	[3]	13.8889	25	[ARHGEF11, CDH5, CEP290, CLIC4, DLG1, DOCK7, EZR, FAT1, FERMT1, GBF1, GOLPH3, LIN7C, MAP1B, MPP2, MYO18A, MYO9B, NDEL1, NUMA1, PRKCI, PTGES2, RACK1, SIPA1L3, SLC6A4, SPDL1, SPRY1]
GO:0002478	antigen processing and presentation of exogenous peptide antigen	GO_BiologicalProcess-GOA_09.02.2016_16h18	0.00084	0.0048	[4]	13.8889	25	[ABCB1, ACTR1B, AP1G1, AP1S2, ARF1, B2M, CTSL, CTSV, DCTN6, DYNC1H1, HLA-A, ITGAV, KIF23, KIF3A, KIF3C, KIF5A, PDIA3, PSMA3, PSMA5, PSMA7, PSMB4, PSMC5, PSME3, SEC24C, UBC]
GO:0034284	response to monosaccharide	GO_BiologicalProcess-GOA_09.02.2016_16h18	0.00086	0.0048	[5]	13.1222	29	[APOA2, APOC3, APOM, ARRB1, CTSV, EGR1, EIF2B2, EIF2B3, EIF2B4, FOXA2, GNAI2, GPLD1, HHEX, HIF1A, HMGCR, HNRNPK, IL1R1, KHK, NUCB2, PFKL, PIM3, PPP3CA, RACK1, RPS6KB1, SLC29A1, SLC2A2, SLC37A4, SOD2, STXBP4]
GO:1903312	negative regulation of mRNA metabolic process	GO_BiologicalProcess-GOA_09.02.2016_16h18	0.00084	0.0048	[5, 6, 7, 8, 9]	24.3243	9	[ACIN1, BARD1, HNRNPK, PABPC1, PTBP1, RBM10, SFSWAP, SRSF4, SRSF7]
GO:0009746	response to hexose	GO_BiologicalProcess-GOA_09.02.2016_16h18	0.00088	0.0049	[6]	13.2701	28	[APOA2, APOC3, APOM, ARRB1, CTSV, EGR1, EIF2B2, EIF2B3, EIF2B4, FOXA2, GNAI2, GPLD1, HHEX, HIF1A, HMGCR, HNRNPK, IL1R1, KHK, NUCB2, PFKL, PIM3, PPP3CA, RACK1, RPS6KB1, SLC29A1, SLC2A2, SLC37A4, STXBP4]
GO:0009894	regulation of catabolic process	GO_BiologicalProcess-GOA_09.02.2016_16h18	0.00089	0.005	[3, 4]	10.1813	73	[ABL1, AKT1, ANAPC10, APOA2, APOC1, APOC3, ARIH2, ATPIF1, AXIN1, AZIN1, BARD1, BCL2L1, BNIP3, BPGM, CDK1, CHMP4B, CTSK, DAB2IP, DAP, DDIT4, DDRGK1, DLC1, DNAJB2, DUSP1, ECD, EZR, FEZ2, GPC3, GPLD1, HIF1A, KDM4A, LPCAT1, LRRK2, MAP1LC3B, MIA3, MYCBP2, NEDD4L, NFE2L2, NKD1, PABPC1, PBK, PIP4K2C, PSEN1, PSMA3, PSMA5, PSMA7, PSMB4, PSMC5, PSME3, PSMG2, QSOX1, RAB1B, RACK1, RAD23B, RDX, SCARB1, SF3B3,…
GO:0042787	protein ubiquitination involved in ubiquitin-dependent protein catabolic process	GO_BiologicalProcess-GOA_09.02.2016_16h18	0.00089	0.005	[8, 9, 10]	13.4328	27	[ANAPC10, ARIH2, ASB2, AXIN1, BFAR, CBL, CDK1, DDB1, GAN, HECTD4, HUWE1, NEDD4L, PSEN1, PSMA3, PSMA5, PSMA7, PSMB4, PSMC5, PSME3, RBBP6, RNF11, RNF7, SIAH2, TRIM25, UBC, UBE2C, UHRF1]
GO:0033160	positive regulation of protein import into nucleus, translocation	GO_BiologicalProcess-GOA_09.02.2016_16h18	0.00089	0.005	[5, 6, 7, 8, 9, 10, 11, 12]	41.6667	5	[BRCA1, CDK1, JAK2, MBD4, MED1]
GO:0035336	long-chain fatty-acyl-CoA metabolic process	GO_BiologicalProcess-GOA_09.02.2016_16h18	0.00094	0.0052	[6, 7]	22.2222	10	[ACLY, ACOT11, ACSL1, ACSL3, ACSL4, ELOVL6, FAR1, PPT1, SLC25A1, THEM4]
GO:0051223	regulation of protein transport	GO_BiologicalProcess-GOA_09.02.2016_16h18	0.00094	0.0052	[4, 5, 6]	9.95086	81	[ABAT, ABL1, ACSL3, ANXA4, APOA2, ARF1, ARIH2, ARRB1, ATPIF1, AXIN1, BARD1, BMP4, BRCA1, BTN2A2, C8orf4, CACNA1D, CD40, CDK1, CDKN1A, CEP290, CTSK, CYLD, DAB2IP, DDX58, DMTN, ECT2, EZR, FOXA2, GNAI2, GOLPH3, GPLD1, HADH, HIF1A, HMGCR, HUWE1, JAK2, KPNA1, LITAF, LRRK2, LYN, LYPLA1, LYPLAL1, MBD4, MBTPS1, MED1, MIEF1, MIF, MYCBP2, MYO18A, NDEL1, NFKBIB, NFKBIE, NOL3, NUP58, PANX1, PFKL, PIM3, PLAGL…
GO:0016125	sterol metabolic process	GO_BiologicalProcess-GOA_09.02.2016_16h18	0.00097	0.0053	[5]	14.4737	22	[ABCA1, ACLY, AKR1D1, APOA2, APOC1, APOC3, APOF, APP, CYP19A1, CYP21A2, ERLIN1, FDPS, HMGCR, LBR, MBTPS1, MBTPS2, MSMO1, MVD, MVK, SCARB1, SORL1, VDAC2]
GO:0009205	purine ribonucleoside triphosphate metabolic process	GO_BiologicalProcess-GOA_09.02.2016_16h18	0.00097	0.0053	[7, 8, 9]	12.5984	32	[AK1, APOC3, ATP5G2, ATP5I, ATPIF1, BPGM, COA6, COQ7, COX5A, DDIT4, DHTKD1, ECD, ENO1, GNAI3, HIF1A, LRRK2, MIA3, MSH2, NDUFA10, NDUFA4, NDUFA8, NDUFAB1, NDUFB5, OGDH, PFKFB1, PFKL, PMPCB, SLC25A25, STAT3, STOML2, UQCC2, UQCRC1]
GO:1903506	regulation of nucleic acid-templated transcription	GO_BiologicalProcess-GOA_09.02.2016_16h18	0.00096	0.0053	[6, 7, 8, 9]	8.24011	302	[ABL1, ADGRG3, ADNP, AFF1, AFF4, AKT1, ALPK3, ANKRD52, ANXA4, APP, ARGLU1, ARHGAP35, ARHGEF11, ARID1B, ARNTL2, ARRB1, ASF1B, ASXL1, ASXL2, ATAD2, ATF7, ATN1, AURKAIP1, AXIN1, BACH1, BAG1, BAZ1A, BAZ1B, BMP4, BPTF, BRCA1, BRD2, BRIP1, BRMS1L, BUD31, C3orf33, C8orf4, CA9, CASK, CBL, CBX5, CC2D1A, CCNA2, CCND1, CD40, CDCA7, CDCA7L, CDK1, CDK12, CDK13, CDT1, CEBPG, CEP290, CHCHD2, CHD4, CHD8, CNOT3, …
GO:0044774	mitotic DNA integrity checkpoint	GO_BiologicalProcess-GOA_09.02.2016_16h18	0.00099	0.0054	[5, 6, 7, 8]	15.7895	18	[CCNA2, CCND1, CDK1, CDKN1A, FANCI, FOXO4, GDNF, GIGYF2, MDC1, MSH2, PSMA3, PSMA5, PSMA7, PSMB4, PSMC5, PSME3, SYF2, UBC]
GO:1901607	alpha-amino acid biosynthetic process	GO_BiologicalProcess-GOA_09.02.2016_16h18	0.001	0.0056	[5, 6, 7, 8, 9]	17.2414	15	[ADI1, ADSL, ATPIF1, CPS1, CYP21A2, EIF2B2, EIF2B4, ENOPH1, GATM, GGT1, GOT1, MTHFD1, MTR, PSAT1, SEPHS2]
GO:0006595	polyamine metabolic process	GO_BiologicalProcess-GOA_09.02.2016_16h18	0.001	0.0056	[6, 7]	16.6667	16	[ADI1, ADSL, AZIN1, CPS1, CYP21A2, ENOPH1, GATM, GOT1, NQO1, PSMA3, PSMA5, PSMA7, PSMB4, PSMC5, PSME3, TINAGL1]
GO:0019083	viral transcription	GO_BiologicalProcess-GOA_09.02.2016_16h18	0.001	0.0056	[4, 5, 6, 7, 8]	13.3005	27	[EP300, ERCC2, GTF2H3, HPN, NUP107, NUP155, NUP210, NUP37, NUP58, RPL10, RPL13, RPL15, RPL18, RPL23A, RPL31, RPL34, RPL37A, RPL5, RPL7, RPS10, RPS11, RPS12, RPS15, RPS16, RPS21, RPS5, RPS8]
GO:0048585	negative regulation of response to stimulus	GO_BiologicalProcess-GOA_09.02.2016_16h18	0.001	0.0056	[2, 3, 4]	9.09704	135	[ABAT, ABL1, ADGRG3, AHSG, AKT1, AKT1S1, APOA2, ARHGAP35, ARRB1, ARRDC3, ASXL1, AXIN1, BCL2L1, BFAR, BMP4, BRCA1, C3orf33, C8orf4, CASK, CBL, CCND1, CHD8, CHMP4B, CRY2, CTHRC1, CYLD, CYP19A1, DAB2IP, DDIT4, DDX3X, DKK1, DLC1, DLG1, DNAJA3, DUSP1, DUSP10, DUSP14, EDN1, EGR1, ERRFI1, EZR, FEZ2, FOXA2, GDNF, GPC3, GPD1L, GPRC5A, GSTO1, HHEX, HIF1A, HLA-A, HMGCR, HMGXB4, HSPH1, HYOU1, IGFBP1, IGFBP6,…
GO:0016311	dephosphorylation	GO_BiologicalProcess-GOA_09.02.2016_16h18	0.001	0.0056	[5]	11.0375	50	[ACP1, ATP1A1, BPGM, CDC25A, CEP192, CRY2, CTDNEP1, DLC1, DLG1, DUSP1, DUSP10, DUSP14, ENOPH1, G6PC, GPLD1, HPN, IKBKB, IMPAD1, INPP1, JAK2, MPP2, MTMR6, MYO1D, NCEH1, NPNT, NSMF, NT5DC1, NT5DC2, PAWR, PCNX4, PFKFB1, PLPP1, PLPP3, PLPPR1, PPIP5K2, PPM1G, PPM1K, PPP1R15A, PPP1R2, PPP2R1A, PPP2R2C, PPP3CA, PPP6R3, PTP4A1, PTP4A3, SLC6A4, SSU72, TSC1, UBASH3B, ZCCHC9]
GO:0034504	protein localization to nucleus	GO_BiologicalProcess-GOA_09.02.2016_16h18	0.001	0.0057	[6]	11.4667	43	[AKT1, AXIN1, BMP4, BRCA1, C8orf4, CCT2, CDK1, CDKN1A, CEP57, CRY2, CSE1L, CTDNEP1, CYLD, DAB2IP, DDX58, ECT2, EIF2AK3, HHEX, JAK2, KPNA1, LITAF, MBD4, MBTPS1, MED1, NCKIPSD, NFKBIB, NFKBIE, NOL3, NUP107, NUP155, NUP58, PDIA3, POU5F1, PPP3CA, RAN, RPL10, SLC11A1, SLC6A4, SOX9, STAT3, SUN2, TAF8, TOPORS]
GO:2001141	regulation of RNA biosynthetic process	GO_BiologicalProcess-GOA_09.02.2016_16h18	0.001	0.0057	[5, 6, 7, 8]	8.22476	303	[ABL1, ADGRG3, ADNP, AFF1, AFF4, AKT1, ALPK3, ANKRD52, ANXA4, APP, ARGLU1, ARHGAP35, ARHGEF11, ARID1B, ARNTL2, ARRB1, ASF1B, ASXL1, ASXL2, ATAD2, ATF7, ATN1, AURKAIP1, AXIN1, BACH1, BAG1, BAZ1A, BAZ1B, BMP4, BPTF, BRCA1, BRD2, BRIP1, BRMS1L, BUD31, C3orf33, C8orf4, CA9, CASK, CBL, CBX5, CC2D1A, CCNA2, CCND1, CD40, CDCA7, CDCA7L, CDK1, CDK12, CDK13, CDT1, CEBPG, CEP290, CHCHD2, CHD4, CHD8, CNOT3, …
GO:0060192	negative regulation of lipase activity	GO_BiologicalProcess-GOA_09.02.2016_16h18	0.001	0.0057	[5, 6, 7]	33.3333	6	[ABL1, APOA2, APOC1, APOC3, SORT1, VDAC2]
GO:0019080	viral gene expression	GO_BiologicalProcess-GOA_09.02.2016_16h18	0.0011	0.0058	[3, 4, 5, 6]	13.0841	28	[EP300, ERCC2, GTF2H3, HPN, NUP107, NUP155, NUP210, NUP37, NUP58, RPL10, RPL13, RPL15, RPL18, RPL23A, RPL31, RPL34, RPL37A, RPL5, RPL7, RPS10, RPS11, RPS12, RPS15, RPS16, RPS21, RPS5, RPS8, UBC]
GO:1903311	regulation of mRNA metabolic process	GO_BiologicalProcess-GOA_09.02.2016_16h18	0.001	0.0059	[5, 6, 7, 8]	15.6522	18	[ACIN1, BARD1, DAZAP1, DDX5, HNRNPK, IWS1, MBNL1, PABPC1, PTBP1, RBM10, RBM25, SAFB, SFSWAP, SRSF4, SRSF7, SUPT6H, TNRC6B, UHMK1]
GO:0097006	regulation of plasma lipoprotein particle levels	GO_BiologicalProcess-GOA_09.02.2016_16h18	0.0011	0.0059	[2, 3]	19.3548	12	[ABCA1, ACSL3, APOA2, APOC1, APOC3, APOM, ARF1, GPLD1, HNRNPK, MTTP, PLAGL2, SCARB1]
GO:0007169	transmembrane receptor protein tyrosine kinase signaling pathway	GO_BiologicalProcess-GOA_09.02.2016_16h18	0.0011	0.0059	[6, 7]	9.60566	95	[ABL1, ACTB, AHSG, AKT1, AKT1S1, APH1A, APP, ARHGEF11, ARHGEF28, ARPC3, ATP6V0E1, BRAF, CAB39, CBL, CDH5, CDKN1A, CEP57, CLSTN1, CRKL, DAB2IP, DDIT4, ECT2, EFNA1, EIF2AK3, EIF4B, EIF4E, EIF4G1, EPHA1, ERRFI1, FGD4, FOXO4, GDNF, GIGYF2, GIT1, GPLD1, GPRC5A, HHEX, HIF1A, IGF2R, IGFBP1, IGFBP6, IKBKB, ITGAV, ITGB3BP, JAK2, LYN, MAPKAP1, MARK3, MIA3, MTSS1, MVB12B, MYH10, NAMPT, NDRG4, NFKB1, NGEF, N…
GO:0007030	Golgi organization	GO_BiologicalProcess-GOA_09.02.2016_16h18	0.0011	0.006	[4]	16.4948	16	[AKR1B10, ATP8B2, CDK1, COG2, CUL7, GBF1, GOLPH3, KIFC3, LRRK2, MYO18A, PTGES2, RAB29, SLC6A4, TBC1D20, USP6NL, VTI1A]
GO:0006415	translational termination	GO_BiologicalProcess-GOA_09.02.2016_16h18	0.0011	0.006	[6, 7, 8]	13.587	25	[AURKAIP1, EIF5A, GSPT1, MRPL42, MRPL52, MRPS26, MRPS36, RPL10, RPL13, RPL15, RPL18, RPL23A, RPL31, RPL34, RPL37A, RPL5, RPL7, RPS10, RPS11, RPS12, RPS15, RPS16, RPS21, RPS5, RPS8]
GO:0071417	cellular response to organonitrogen compound	GO_BiologicalProcess-GOA_09.02.2016_16h18	0.0011	0.006	[4, 5]	10.1429	71	[ABL1, AHSG, AKT1, AKT1S1, APP, APRT, ATP6V0E1, BCL2L1, BRAF, BRCA1, CAB39, CCNA2, COL4A6, CPS1, CYP21A2, DAB2IP, DDC, DMTN, EDN1, EGR1, EIF4B, EIF4E, EIF4G1, ERRFI1, EZR, FOXO4, GOT1, GPLD1, HIF1A, HNRNPK, ID1, IGFBP1, JAK2, KLF4, LRRK2, LYN, MARK3, MAX, NAMPT, NFKB1, NSMF, NUCB2, NUCKS1, PPARG, PPP1R15A, PRKAB1, PRKCI, PSMA3, PSMA5, PSMA7, PSMB4, PSMC5, PSME3, PTAFR, RAB8A, REPIN1, RPS6KB1, SLC…
GO:0032868	response to insulin	GO_BiologicalProcess-GOA_09.02.2016_16h18	0.0011	0.006	[5, 6, 7]	10.8787	52	[AHSG, AKT1, AKT1S1, APRT, ATP6V0E1, BRAF, CAB39, CRY2, DAB2IP, EGR1, EIF4B, EIF4E, EIF4G1, ERRFI1, FOXO4, GOT1, GPLD1, HADH, HHEX, HIF1A, HNRNPK, IGFBP1, JAK2, KHK, LYN, MARK3, MAX, NAMPT, NUCB2, NUCKS1, PFKFB1, PPARG, PRKAB1, PRKCI, PSMA3, PSMA5, PSMA7, PSMB4, PSMC5, PSME3, RAB8A, REPIN1, RPS6KB1, SOCS7, SORT1, STXBP4, THEM4, TRIB3, TSC1, UBC, WDR83, YBX1]
GO:0044839	cell cycle G2/M phase transition	GO_BiologicalProcess-GOA_09.02.2016_16h18	0.0011	0.006	[5, 6]	13.2353	27	[ABCB1, ALMS1, APP, BACH1, BRIP1, CCNA2, CCND1, CDC25A, CDK1, CDKN1A, CEP192, CEP290, CEP57, DYNC1H1, EP300, FANCI, FOXO4, LIN54, NUMA1, PLCB1, PPP2R1A, RAB11A, RAB8A, RAD51B, SYF2, TUBB, UBC]
GO:1903008	organelle disassembly	GO_BiologicalProcess-GOA_09.02.2016_16h18	0.0011	0.006	[4, 5]	12.6016	31	[ACIN1, ASB2, ATG2B, ATG9A, ATPIF1, BNIP3, CDK1, CTSK, EVA1B, FAM13B, FUNDC1, GBF1, HIF1A, MAP1LC3B, MDH1, MEX3C, MYLK, NR2C2, PDK1, PTGES2, SLC1A4, SLC37A4, SNRPB, TOMM20, TOMM70A, UBC, USP30, VDAC1, WIPI1, ZBTB17, ZNF189]
GO:0051438	regulation of ubiquitin-protein transferase activity	GO_BiologicalProcess-GOA_09.02.2016_16h18	0.0011	0.006	[5, 6, 8, 9, 10, 11]	14.5833	21	[ABL1, ANAPC10, ARRDC3, AXIN1, CDK1, DCUN1D2, DUSP1, PSEN1, PSMA3, PSMA5, PSMA7, PSMB4, PSMC5, PSME3, PSMG2, TOPORS, TRIB3, TTK, UBC, UBE2C, UBE2L3]
GO:0001101	response to acid chemical	GO_BiologicalProcess-GOA_09.02.2016_16h18	0.0011	0.006	[3]	11.5819	41	[ABCA1, ACSL1, AKR1C1, AKR1C2, AKT1, APOC3, ASXL1, BCL2L1, BMP4, COL4A6, CPS1, CYP21A2, DKK1, DUSP1, E2F1, EDN1, EGR1, GDNF, GNAI2, HIF1A, HNRNPK, IGF2R, IKBKB, KLF4, LRP11, LYN, MGMT, NCOA1, NSMF, OSR1, PPARG, PTAFR, RPS6KB1, SLC6A4, SOD2, SOX9, TFRC, TINAGL1, TMEM161A, UFL1, YY1]
GO:0051055	negative regulation of lipid biosynthetic process	GO_BiologicalProcess-GOA_09.02.2016_16h18	0.0011	0.006	[4, 5, 6, 7]	21.7391	10	[APOC1, APOC3, ATP1A1, BRCA1, ERLIN1, GFI1, LPCAT1, NFKB1, PIBF1, TRIB3]
GO:1903320	regulation of protein modification by small protein conjugation or removal	GO_BiologicalProcess-GOA_09.02.2016_16h18	0.0011	0.0062	[6, 7, 8]	11.8971	37	[ABL1, ANAPC10, ARRB1, ARRDC3, AXIN1, BRCA1, CDK1, DCUN1D2, DNAJA3, DNAJB2, DUSP1, EGR1, FANCI, LRRK2, MIA3, PAXIP1, PIAS4, PSEN1, PSMA3, PSMA5, PSMA7, PSMB4, PSMC5, PSME3, PSMG2, SENP2, SEPT4, SIAH2, TBC1D7, TNFAIP3, TOPORS, TRIB3, TTK, UBC, UBE2C, UBE2L3, UFL1]
GO:0044106	cellular amine metabolic process	GO_BiologicalProcess-GOA_09.02.2016_16h18	0.0012	0.0064	[4, 5]	12.5506	31	[ABAT, ACSL3, ADI1, ADSL, ALDH7A1, APOA2, APOC1, AZIN1, CHDH, CPS1, CYP21A2, DDC, DMGDH, ENOPH1, ENPP7, GATM, GOT1, GPLD1, HPN, LPCAT1, NQO1, PNPLA6, PSMA3, PSMA5, PSMA7, PSMB4, PSMC5, PSME3, SCARB1, SLC44A2, TINAGL1]
GO:0035967	cellular response to topologically incorrect protein	GO_BiologicalProcess-GOA_09.02.2016_16h18	0.0012	0.0064	[4, 5]	14.4828	21	[ADD1, BFAR, CCND1, CREB3L3, CUL7, DAB2IP, DNAJB11, EIF2AK3, EP300, ERO1A, HDGF, HYOU1, IGFBP1, MBTPS1, MBTPS2, NFE2L2, POMT2, PPP1R15A, RACK1, WIPI1, ZBTB17]
GO:0046034	ATP metabolic process	GO_BiologicalProcess-GOA_09.02.2016_16h18	0.0012	0.0065	[7, 8, 9, 10]	12.6582	30	[AK1, APOC3, ATP5G2, ATP5I, ATPIF1, BPGM, COA6, COQ7, COX5A, DDIT4, DHTKD1, ECD, ENO1, HIF1A, MIA3, MSH2, NDUFA10, NDUFA4, NDUFA8, NDUFAB1, NDUFB5, OGDH, PFKFB1, PFKL, PMPCB, SLC25A25, STAT3, STOML2, UQCC2, UQCRC1]
GO:0009308	amine metabolic process	GO_BiologicalProcess-GOA_09.02.2016_16h18	0.0012	0.0065	[4]	12.4031	32	[ABAT, ACSL3, ADI1, ADSL, ALDH7A1, AOC3, APOA2, APOC1, AZIN1, CHDH, CPS1, CYP21A2, DDC, DMGDH, ENOPH1, ENPP7, GATM, GOT1, GPLD1, HPN, LPCAT1, NQO1, PNPLA6, PSMA3, PSMA5, PSMA7, PSMB4, PSMC5, PSME3, SCARB1, SLC44A2, TINAGL1]
GO:0072593	reactive oxygen species metabolic process	GO_BiologicalProcess-GOA_09.02.2016_16h18	0.0012	0.0066	[3]	12.2677	33	[AKT1, ATPIF1, BNIP3, BRCA1, CDKN1A, COQ7, CPS1, CYGB, CYP21A2, DDAH1, DDIT4, DLC1, EDN1, GBF1, GPX3, HIF1A, JAK2, KLF4, LRRK2, LYPLA1, NFE2L2, NQO1, PRDX3, PRDX6, PTGES2, RIPK1, SLC7A2, SOD2, STAT3, STK17A, VDAC1, VDAC2, WASL]
GO:0050790	regulation of catalytic activity	GO_BiologicalProcess-GOA_09.02.2016_16h18	0.0013	0.0067	[3, 4]	8.52525	211	[ABL1, ACSL1, ADNP, AHSG, AKR1B10, AKT1, AKT1S1, ANAPC10, ANXA4, APH1A, APOA2, APOC1, APOC3, APP, ARAP1, ARF1, ARHGAP11A, ARHGAP35, ARHGEF11, ARHGEF28, ARRB1, ARRDC3, ATPIF1, AURKAIP1, AXIN1, AZIN1, BMP2K, BMP4, BNIP2, BRAF, BUD31, C3, CAB39, CAMK2N1, CCL16, CCNA2, CCND1, CCT2, CD40, CDC25A, CDC42EP1, CDK1, CDK12, CDKN1A, CEP192, CKS2, CLPX, COPS2, CRKL, CRY2, CSNK2B, CYGB, DAB2IP, DAP, DCUN1D2, …
GO:0006355	regulation of transcription, DNA-templated	GO_BiologicalProcess-GOA_09.02.2016_16h18	0.0013	0.0067	[5, 6, 7, 8, 9, 10]	8.20752	299	[ABL1, ADGRG3, ADNP, AFF1, AFF4, AKT1, ALPK3, ANKRD52, ANXA4, APP, ARGLU1, ARHGAP35, ARHGEF11, ARID1B, ARNTL2, ARRB1, ASF1B, ASXL1, ASXL2, ATAD2, ATF7, ATN1, AXIN1, BACH1, BAG1, BAZ1A, BAZ1B, BMP4, BPTF, BRCA1, BRD2, BRIP1, BRMS1L, BUD31, C3orf33, C8orf4, CA9, CASK, CBL, CBX5, CC2D1A, CCNA2, CCND1, CD40, CDCA7, CDCA7L, CDK1, CDK12, CDK13, CDT1, CEBPG, CEP290, CHCHD2, CHD4, CHD8, CNOT3, CNOT6L, CO…
GO:0010557	positive regulation of macromolecule biosynthetic process	GO_BiologicalProcess-GOA_09.02.2016_16h18	0.0013	0.0067	[4, 5, 6]	8.85006	157	[ABCF1, AFF1, AKT1, APOA2, APP, ARHGEF11, ARID1B, ARNTL2, ARRB1, ASXL1, ASXL2, ATAD2, AXIN1, BACH1, BAG1, BAZ1B, BMP4, BPTF, BRCA1, BRIP1, BUD31, CASK, CCNA2, CCT2, CD40, CDK1, CEBPG, CEP290, CHCHD2, CHD8, COQ7, CREB3L3, CREBBP, CRTC2, DAB2IP, DDRGK1, DDX3X, DDX5, DDX58, DHX33, DKC1, E2F1, EDN1, EGR1, EIF2AK3, EIF5A, EP300, EPRS, ERCC2, ERLIN1, FHL2, FOXA2, FOXO4, FUBP3, GDNF, GTF2H3, HCFC1, HEAT…
GO:0001922	B-1 B cell homeostasis	GO_BiologicalProcess-GOA_09.02.2016_16h18	0.0013	0.0067	[5, 8]	75	3	[ABL1, HIF1A, TNFAIP3]
GO:0043091	L-arginine import	GO_BiologicalProcess-GOA_09.02.2016_16h18	0.0013	0.0067	[8, 9, 10, 11, 12, 13]	75	3	[SLC11A1, SLC7A2, TINAGL1]
GO:0090467	arginine import	GO_BiologicalProcess-GOA_09.02.2016_16h18	0.0013	0.0067	[7, 8, 9, 10, 11, 12]	75	3	[SLC11A1, SLC7A2, TINAGL1]
GO:1902023	L-arginine transport	GO_BiologicalProcess-GOA_09.02.2016_16h18	0.0013	0.0067	[7, 8, 9, 10, 11, 12]	75	3	[SLC11A1, SLC7A2, TINAGL1]
GO:0002084	protein depalmitoylation	GO_BiologicalProcess-GOA_09.02.2016_16h18	0.0013	0.0067	[6, 7, 8]	75	3	[LYPLA1, LYPLAL1, PPT1]
GO:0072190	ureter urothelium development	GO_BiologicalProcess-GOA_09.02.2016_16h18	0.0013	0.0067	[4, 5, 6, 7, 8]	75	3	[BMP4, OSR1, SOX9]
GO:1903753	negative regulation of p38MAPK cascade	GO_BiologicalProcess-GOA_09.02.2016_16h18	0.0013	0.0067	[7, 8, 9, 10, 11, 12, 13]	75	3	[DLG1, EZR, HSPH1]
GO:0043102	amino acid salvage	GO_BiologicalProcess-GOA_09.02.2016_16h18	0.0013	0.0068	[5, 6, 7, 8, 9]	38.4615	5	[ADI1, EIF2B2, EIF2B4, ENOPH1, GOT1]
GO:0071265	L-methionine biosynthetic process	GO_BiologicalProcess-GOA_09.02.2016_16h18	0.0013	0.0068	[7, 8, 9, 10, 11, 12]	38.4615	5	[ADI1, EIF2B2, EIF2B4, ENOPH1, GOT1]
GO:0071267	L-methionine salvage	GO_BiologicalProcess-GOA_09.02.2016_16h18	0.0013	0.0068	[6, 7, 8, 9, 10, 11, 12, 13]	38.4615	5	[ADI1, EIF2B2, EIF2B4, ENOPH1, GOT1]
GO:0044598	doxorubicin metabolic process	GO_BiologicalProcess-GOA_09.02.2016_16h18	0.0013	0.0068	[4, 5, 6]	50	4	[AKR1B10, AKR1C1, AKR1C2, AKR7A2]
GO:0044597	daunorubicin metabolic process	GO_BiologicalProcess-GOA_09.02.2016_16h18	0.0013	0.0068	[4, 5, 6, 7]	50	4	[AKR1B10, AKR1C1, AKR1C2, AKR7A2]
GO:0032372	negative regulation of sterol transport	GO_BiologicalProcess-GOA_09.02.2016_16h18	0.0013	0.0068	[4, 5, 6, 7, 8]	38.4615	5	[ABCG5, APOA2, APOC1, APOC3, NFKB1]
GO:0032375	negative regulation of cholesterol transport	GO_BiologicalProcess-GOA_09.02.2016_16h18	0.0013	0.0068	[5, 6, 7, 8, 9]	38.4615	5	[ABCG5, APOA2, APOC1, APOC3, NFKB1]
GO:0048227	plasma membrane to endosome transport	GO_BiologicalProcess-GOA_09.02.2016_16h18	0.0013	0.0068	[5, 6, 7]	50	4	[RAB11A, RAB35, SORT1, USP6NL]
GO:0050686	negative regulation of mRNA processing	GO_BiologicalProcess-GOA_09.02.2016_16h18	0.0013	0.0068	[5, 6, 7, 8, 9, 10]	25	8	[ACIN1, BARD1, HNRNPK, PTBP1, RBM10, SFSWAP, SRSF4, SRSF7]
GO:0030953	astral microtubule organization	GO_BiologicalProcess-GOA_09.02.2016_16h18	0.0013	0.0068	[5, 6, 7]	50	4	[DLG1, EZR, RAB11A, TACC2]
GO:0051173	positive regulation of nitrogen compound metabolic process	GO_BiologicalProcess-GOA_09.02.2016_16h18	0.0013	0.0069	[3, 4, 5]	8.75912	168	[ABAT, ABCA1, ABCF1, ACSL3, ADNP, AFF1, AKT1, APP, ARHGEF11, ARID1B, ARNTL2, ARRB1, ASXL1, ASXL2, ATAD2, AXIN1, BACH1, BAG1, BAZ1B, BMP4, BPTF, BRCA1, BRIP1, BUD31, CASK, CCNA2, CCT2, CD40, CDK1, CEBPG, CEP290, CHCHD2, CHD8, COQ7, CREB3L3, CREBBP, CRTC2, DAB2IP, DAZAP1, DDAH1, DDRGK1, DDX3X, DDX5, DDX58, DHX33, DKC1, E2F1, EDN1, EGR1, EIF2AK3, EIF5A, EP300, EPRS, ERCC2, ERLIN1, FHL2, FOXA2, FOXO4…
GO:0051640	organelle localization	GO_BiologicalProcess-GOA_09.02.2016_16h18	0.0014	0.007	[3]	10.7287	53	[AP1S2, ARF1, ARL4D, BLOC1S6, BRAF, CDC42BPA, CHMP4B, CLSTN1, CNIH1, COPZ1, DLG1, DOCK7, DPYSL2, DYNC1H1, EIF6, EZR, F5, GBF1, HHEX, HIF1A, KIF3A, KIF3C, LAMP1, LRRK2, LYN, MAP1B, MLH1, MYH10, NAPB, NDEL1, NUMA1, NUSAP1, PIBF1, PPP6R3, PSEN1, PTGES2, RAB11A, RAB1B, RAN, RPS15, SEC24C, SLC6A4, SPDL1, SPRY1, SUN2, TACC1, TACC2, TFG, TRAPPC4, VAMP8, WASL, WIPI1, YKT6]
GO:0051668	localization within membrane	GO_BiologicalProcess-GOA_09.02.2016_16h18	0.0014	0.0071	[3]	16.1616	16	[ARF1, CNIH1, COPZ1, F5, GBF1, GOLPH3, MYO18A, PPP6R3, PRKCI, PTGES2, RAB1B, SEC24C, SNX3, TBC1D20, TFG, TRAPPC4]
GO:0005996	monosaccharide metabolic process	GO_BiologicalProcess-GOA_09.02.2016_16h18	0.0014	0.0071	[4, 5]	11.5274	40	[ACADM, AKT1, B3GLCT, BPGM, CRTC2, ENO1, FOXA2, FUT6, G6PC, GALE, GNMT, GOT1, GPLD1, GSTO1, HECTD4, KHK, MAN2A2, MAN2B1, MDH1, OAS1, PCNX4, PDHB, PDK1, PFKFB1, PFKL, PGD, PGM2L1, PHKA2, POFUT1, RBKS, RPE, SLC25A1, SLC25A11, SLC2A1, SLC2A3, SLC35B4, SLC37A4, UBC, UGP2, UGT2B7]
GO:0008203	cholesterol metabolic process	GO_BiologicalProcess-GOA_09.02.2016_16h18	0.0014	0.0072	[6]	14.5985	20	[ABCA1, ACLY, AKR1D1, APOA2, APOC1, APOC3, APOF, APP, ERLIN1, FDPS, HMGCR, LBR, MBTPS1, MBTPS2, MSMO1, MVD, MVK, SCARB1, SORL1, VDAC2]
GO:0035357	peroxisome proliferator activated receptor signaling pathway	GO_BiologicalProcess-GOA_09.02.2016_16h18	0.0014	0.0072	[5, 6]	31.5789	6	[ASXL1, ASXL2, MBD4, MED1, PPARG, STARD10]
GO:0043092	L-amino acid import	GO_BiologicalProcess-GOA_09.02.2016_16h18	0.0014	0.0072	[7, 8, 9, 10, 11]	31.5789	6	[KCNJ10, SLC11A1, SLC6A4, SLC6A9, SLC7A2, TINAGL1]
GO:0019884	antigen processing and presentation of exogenous antigen	GO_BiologicalProcess-GOA_09.02.2016_16h18	0.0014	0.0072	[3]	13.369	25	[ABCB1, ACTR1B, AP1G1, AP1S2, ARF1, B2M, CTSL, CTSV, DCTN6, DYNC1H1, HLA-A, ITGAV, KIF23, KIF3A, KIF3C, KIF5A, PDIA3, PSMA3, PSMA5, PSMA7, PSMB4, PSMC5, PSME3, SEC24C, UBC]
GO:1903649	regulation of cytoplasmic transport	GO_BiologicalProcess-GOA_09.02.2016_16h18	0.0015	0.0074	[5, 6]	10.7438	52	[ABL1, ACSL3, ANK2, ARF1, ARIH2, ATPIF1, AXIN1, BARD1, BMP4, BRCA1, C8orf4, CDK1, CDKN1A, CTSK, CYLD, DAB2IP, DDX58, ECT2, EZR, GSTO1, HUWE1, IWS1, JAK2, KPNA1, LITAF, LRRK2, LYN, LYPLA1, LYPLAL1, MBD4, MBTPS1, MED1, NFKBIB, NFKBIE, NOL3, NUP58, PLAGL2, POU5F1, PPP3CA, RACK1, RDX, RPL10, SLC6A4, SNX3, SORL1, SUPT6H, TBC1D20, UBASH3B, UBE2J2, UBE2L3, UHMK1, ZBTB17]
GO:0033157	regulation of intracellular protein transport	GO_BiologicalProcess-GOA_09.02.2016_16h18	0.0015	0.0074	[5, 6, 7]	11.1386	45	[ACSL3, ARIH2, ATPIF1, AXIN1, BARD1, BMP4, BRCA1, C8orf4, CDK1, CDKN1A, CEP290, CTSK, CYLD, DAB2IP, DDX58, DMTN, ECT2, HUWE1, JAK2, KPNA1, LITAF, LRRK2, LYPLA1, LYPLAL1, MBD4, MBTPS1, MED1, MIEF1, NDEL1, NFKBIB, NFKBIE, NOL3, NUP58, PLAGL2, POU5F1, PPP3CA, RAB29, RACK1, RPL10, SNX3, SORL1, UBE2J2, UBE2L3, UHMK1, ZBTB17]
GO:0001701	in utero embryonic development	GO_BiologicalProcess-GOA_09.02.2016_16h18	0.0015	0.0074	[6, 7]	11.1386	45	[ADD1, AKT1, ANKRD11, AXIN1, BCL2L1, BNIP2, BPTF, CCNB1IP1, CHD8, CNOT3, COQ7, DDX5, EDN1, ERCC2, FOXA2, GINS1, HHEX, HIF1A, KIF3A, KMT2D, MBD4, MBNL1, MED1, MIA3, MSH2, MTSS1, MYH10, NASP, NCOA1, NDEL1, PLOD3, POU5F1, PSMA7, RAD51B, RBBP6, SENP2, STIL, SYF2, TAF8, TAPT1, TERF2, TJP1, XRCC2, YBX1, ZNF335]
GO:0030258	lipid modification	GO_BiologicalProcess-GOA_09.02.2016_16h18	0.0015	0.0074	[4, 5]	12.9808	27	[ACAD9, ACADM, ACADS, AKT1, APOA2, APOC1, CLSTN1, CYGB, DECR1, ECH1, HACL1, HADH, HADHB, IMPAD1, INPP1, IP6K2, IVD, MTMR6, NUCB2, PHYH, PIK3C2B, PIP4K2C, PLPP1, PLPP3, PLPPR1, PPARG, VDAC2]
GO:0009144	purine nucleoside triphosphate metabolic process	GO_BiologicalProcess-GOA_09.02.2016_16h18	0.0015	0.0075	[6, 7, 8]	12.2605	32	[AK1, APOC3, ATP5G2, ATP5I, ATPIF1, BPGM, COA6, COQ7, COX5A, DDIT4, DHTKD1, ECD, ENO1, GNAI3, HIF1A, LRRK2, MIA3, MSH2, NDUFA10, NDUFA4, NDUFA8, NDUFAB1, NDUFB5, OGDH, PFKFB1, PFKL, PMPCB, SLC25A25, STAT3, STOML2, UQCC2, UQCRC1]
GO:0045862	positive regulation of proteolysis	GO_BiologicalProcess-GOA_09.02.2016_16h18	0.0015	0.0076	[5, 6, 7, 8]	11.3208	42	[AKT1, ANAPC10, APP, ARIH2, ARRB1, ATPIF1, AURKAIP1, AXIN1, C3, CDK1, CLPX, DAB2IP, DAP, DDRGK1, DDX3X, DLC1, DNAJA3, DNAJB2, EIF2AK3, GPLD1, HPN, JAK2, LRRK2, NFE2L2, NGFRAP1, PAWR, PDCD6, PLGRKT, PPARG, PSEN1, PSMA3, PSMA5, PSMA7, PSMB4, PSMC5, PSME3, RACK1, RIPK1, SLC11A2, TRIB3, UBC, UBE2C]
GO:0044744	protein targeting to nucleus	GO_BiologicalProcess-GOA_09.02.2016_16h18	0.0015	0.0077	[4, 5, 6, 7, 8]	11.9048	35	[AKT1, AXIN1, BMP4, BRCA1, C8orf4, CDK1, CDKN1A, CEP57, CRY2, CSE1L, CYLD, DAB2IP, DDX58, ECT2, JAK2, KPNA1, LITAF, MBD4, MBTPS1, MED1, NCKIPSD, NFKBIB, NFKBIE, NOL3, NUP107, NUP155, NUP58, PDIA3, POU5F1, PPP3CA, RAN, RPL10, SLC11A1, SLC6A4, STAT3]
GO:1902593	single-organism nuclear import	GO_BiologicalProcess-GOA_09.02.2016_16h18	0.0015	0.0077	[5, 6, 8]	11.9048	35	[AKT1, AXIN1, BMP4, BRCA1, C8orf4, CDK1, CDKN1A, CEP57, CRY2, CSE1L, CYLD, DAB2IP, DDX58, ECT2, JAK2, KPNA1, LITAF, MBD4, MBTPS1, MED1, NCKIPSD, NFKBIB, NFKBIE, NOL3, NUP107, NUP155, NUP58, PDIA3, POU5F1, PPP3CA, RAN, RPL10, SLC11A1, SLC6A4, STAT3]
GO:0006606	protein import into nucleus	GO_BiologicalProcess-GOA_09.02.2016_16h18	0.0015	0.0077	[4, 5, 6, 7, 8, 9]	11.9048	35	[AKT1, AXIN1, BMP4, BRCA1, C8orf4, CDK1, CDKN1A, CEP57, CRY2, CSE1L, CYLD, DAB2IP, DDX58, ECT2, JAK2, KPNA1, LITAF, MBD4, MBTPS1, MED1, NCKIPSD, NFKBIB, NFKBIE, NOL3, NUP107, NUP155, NUP58, PDIA3, POU5F1, PPP3CA, RAN, RPL10, SLC11A1, SLC6A4, STAT3]
GO:0036473	cell death in response to oxidative stress	GO_BiologicalProcess-GOA_09.02.2016_16h18	0.0015	0.0077	[4, 5]	17.8082	13	[AKT1, HIF1A, HSPH1, JAK2, LRRK2, MCL1, NFE2L2, NOL3, P4HB, PDK1, RACK1, SFPQ, SOD2]
GO:1903201	regulation of oxidative stress-induced cell death	GO_BiologicalProcess-GOA_09.02.2016_16h18	0.0015	0.0077	[4, 5, 6, 7]	19.6429	11	[AKT1, HIF1A, HSPH1, LRRK2, MCL1, NFE2L2, NOL3, P4HB, RACK1, SFPQ, SOD2]
GO:0016310	phosphorylation	GO_BiologicalProcess-GOA_09.02.2016_16h18	0.0016	0.0078	[5]	8.55292	198	[ABL1, ACSL1, ADNP, AHSG, AK1, AKAP8L, AKT1, AKT1S1, ALPK3, APOC3, APP, ARRB1, AURKAIP1, AXIN1, BAG1, BARD1, BAZ1B, BMP2K, BMP4, BNIP2, BPGM, BRAF, BUD31, C3, C3orf33, CAB39, CAMK2N1, CASK, CCDC6, CCL16, CCNA2, CCND1, CD40, CDC25A, CDC42BPA, CDK1, CDK12, CDK13, CDKN1A, CKS2, CLSTN1, CMPK1, COA6, COQ7, COX5A, CRKL, CRLF1, CSNK1G2, CSNK2B, DAB2IP, DCK, DDIT4, DDRGK1, DHTKD1, DKK1, DLG1, DMTN, DNAJA…
GO:0031328	positive regulation of cellular biosynthetic process	GO_BiologicalProcess-GOA_09.02.2016_16h18	0.0016	0.0078	[4, 5, 6]	8.73431	167	[ABCA1, ABCF1, ACSL3, ADNP, AFF1, AKT1, APOA2, APOC3, APP, ARHGEF11, ARID1B, ARNTL2, ARRB1, ASXL1, ASXL2, ATAD2, AXIN1, BACH1, BAG1, BAZ1B, BMP4, BPTF, BRCA1, BRIP1, BUD31, CASK, CCNA2, CCT2, CD40, CDK1, CEBPG, CEP290, CHCHD2, CHD8, COQ7, CREB3L3, CREBBP, CRTC2, CTDNEP1, DAB2IP, DDAH1, DDRGK1, DDX3X, DDX5, DDX58, DHX33, DKC1, E2F1, EDN1, EGR1, EIF2AK3, EIF5A, EP300, EPRS, ERCC2, ERLIN1, FHL2, FOX…
GO:1990267	response to transition metal nanoparticle	GO_BiologicalProcess-GOA_09.02.2016_16h18	0.0016	0.0078	[3]	13.6905	23	[ABAT, ACADM, ANK2, ATAT1, B2M, CCND1, CDK1, CPS1, CYP21A2, EIF2AK3, KHK, LRRK2, MYCBP2, NFKB1, PAWR, PPP1R15A, SLC11A2, SLC30A10, SLC30A7, SOD2, TFR2, TFRC, TINAGL1]
GO:0071456	cellular response to hypoxia	GO_BiologicalProcess-GOA_09.02.2016_16h18	0.0016	0.0078	[4, 6]	14.1892	21	[AKT1, BACH1, BNIP3, BRIP1, CA9, CCNA2, CHCHD2, CREBBP, E2F1, EDN1, EGR1, EP300, ERO1A, HIF1A, HYOU1, MIA3, P4HB, PDK1, SLC29A1, UBC, UBE2D2]
GO:0009067	aspartate family amino acid biosynthetic process	GO_BiologicalProcess-GOA_09.02.2016_16h18	0.0016	0.008	[6, 7, 8, 9, 10]	26.9231	7	[ADI1, EIF2B2, EIF2B4, ENOPH1, GOT1, MTHFD1, MTR]
GO:0008209	androgen metabolic process	GO_BiologicalProcess-GOA_09.02.2016_16h18	0.0016	0.008	[3, 4, 5, 6]	24.2424	8	[AKR1D1, CYP19A1, HSD17B11, HSD17B8, MBD4, MED1, SCARB1, UGT2B7]
GO:0000302	response to reactive oxygen species	GO_BiologicalProcess-GOA_09.02.2016_16h18	0.0017	0.0081	[4]	12.3016	31	[ABL1, BMP4, BNIP3, CCNA2, CDK1, DLC1, DUSP1, ECT2, EDN1, ERO1A, GPX2, GPX3, GPX7, HIF1A, HSPH1, IL1R1, KLF4, LIG1, LRRK2, MTR, NFE2L2, NQO1, OSER1, P4HB, PRDX3, PRDX6, RACK1, SDC1, SOD2, TINAGL1, TNFAIP3]
GO:0035384	thioester biosynthetic process	GO_BiologicalProcess-GOA_09.02.2016_16h18	0.0017	0.0082	[4, 5]	18.4615	12	[ACLY, ACOT11, ACSL1, ACSL3, ACSL4, ACSS1, ELOVL6, PDHB, PDK1, PPT1, SLC25A1, THEM4]
GO:0071616	acyl-CoA biosynthetic process	GO_BiologicalProcess-GOA_09.02.2016_16h18	0.0017	0.0082	[5, 6]	18.4615	12	[ACLY, ACOT11, ACSL1, ACSL3, ACSL4, ACSS1, ELOVL6, PDHB, PDK1, PPT1, SLC25A1, THEM4]
GO:0030154	cell differentiation	GO_BiologicalProcess-GOA_09.02.2016_16h18	0.0017	0.0083	[4]	8.10139	326	[ABCA1, ABL1, ACADM, ACIN1, ACSL4, ACTA2, ACTB, ADD1, ADGRG3, ADNP, AFF4, AKR1C1, AKR1C2, AKT1, ALKBH5, ALPK3, ANK2, ANKRD52, ANLN, ANXA4, ANXA7, AP1G1, AP1S2, APH1A, APP, ARF1, ARHGAP35, ARHGEF11, ARHGEF28, ARIH2, ARL4D, ARPC3, ASB2, ASF1B, ASXL1, ASXL2, ATAT1, ATPIF1, AXIN1, AZI2, B2M, BAG1, BCL2L1, BLOC1S6, BMP4, BNIP2, BNIP3, BRAF, BUD31, CACNA1D, CAPZB, CASP10, CCDC47, CCNB1IP1, CCND1, CDH5,…
GO:0016569	covalent chromatin modification	GO_BiologicalProcess-GOA_09.02.2016_16h18	0.0017	0.0083	[6, 7]	10.8168	49	[ARRB1, ASXL1, ASXL2, BAZ1B, BRCA1, BRMS1L, CDK1, CREBBP, CRTC2, DDB1, EHMT1, EIF4E, EP300, GDNF, GFI1, HCFC1, HUWE1, IWS1, JADE2, JAK2, KAT6A, KDM4A, KDM7A, KMT2C, KMT2D, LDB1, MBD2, MSL3, MTA2, NCOA1, PAXIP1, PIWIL2, POU5F1, PRDM4, PRMT7, RCOR1, RNF8, RUVBL2, SF3B3, SFPQ, SIRT7, SUDS3, SUPT6H, TCF3, TMEM98, UHRF1, UHRF2, WAC, ZNF335]
GO:0051443	positive regulation of ubiquitin-protein transferase activity	GO_BiologicalProcess-GOA_09.02.2016_16h18	0.0017	0.0084	[5, 6, 7, 8, 9, 10, 11, 12]	15.8416	16	[ANAPC10, ARRDC3, AXIN1, CDK1, DCUN1D2, PSMA3, PSMA5, PSMA7, PSMB4, PSMC5, PSME3, TOPORS, TRIB3, UBC, UBE2C, UBE2L3]
GO:0014070	response to organic cyclic compound	GO_BiologicalProcess-GOA_09.02.2016_16h18	0.0017	0.0085	[4]	9.5288	91	[ABAT, ABCA1, ABCA3, ABL1, ACADM, ACADS, ACSL1, ACSL3, AKT1, ANXA7, APOA2, APOC3, APP, ATAT1, ATP1A1, AXIN1, BCL2L1, BMP4, BRAF, BRCA1, C12orf76, C3, CA9, CCNA2, CCND1, CDK1, CDKN1A, CHRNA2, CPS1, CTSV, CYP21A2, DDX58, DHODH, DMTN, DPYSL2, DUSP1, EDN1, EGR1, EP300, ERRFI1, EZR, GDNF, GNAI1, GNAI2, GOT1, GPLD1, HCFC1, HIF1A, HNRNPK, ID1, IL1RN, JAK2, KLF4, KMT2D, LOX, LRRK2, LYN, MBD4, MED1, MGMT,…
GO:0016054	organic acid catabolic process	GO_BiologicalProcess-GOA_09.02.2016_16h18	0.0018	0.0085	[4, 5]	12.253	31	[ABAT, ACAD9, ACADM, ACADS, ADSL, AKR1D1, AKT1, ALDH7A1, ATAT1, CSAD, CYP4F12, CYP4F2, DDAH1, DECR1, DLST, DTD1, ECH1, GCAT, GOT1, GSTZ1, HACL1, HADH, HADHB, IVD, OGDH, PHYH, PIPOX, PPM1K, PRODH2, SULT2A1, TINAGL1]
GO:0046395	carboxylic acid catabolic process	GO_BiologicalProcess-GOA_09.02.2016_16h18	0.0018	0.0085	[5, 6, 7]	12.253	31	[ABAT, ACAD9, ACADM, ACADS, ADSL, AKR1D1, AKT1, ALDH7A1, ATAT1, CSAD, CYP4F12, CYP4F2, DDAH1, DECR1, DLST, DTD1, ECH1, GCAT, GOT1, GSTZ1, HACL1, HADH, HADHB, IVD, OGDH, PHYH, PIPOX, PPM1K, PRODH2, SULT2A1, TINAGL1]
GO:0035338	long-chain fatty-acyl-CoA biosynthetic process	GO_BiologicalProcess-GOA_09.02.2016_16h18	0.0018	0.0086	[7, 8]	21.9512	9	[ACLY, ACOT11, ACSL1, ACSL3, ACSL4, ELOVL6, PPT1, SLC25A1, THEM4]
GO:0006414	translational elongation	GO_BiologicalProcess-GOA_09.02.2016_16h18	0.0018	0.0086	[5, 6, 7, 8]	12.5	29	[AURKAIP1, DTD1, EEF1G, EIF5A, IARS, IARS2, MRPL42, MRPL52, MRPS26, MRPS36, RPL10, RPL13, RPL15, RPL18, RPL23A, RPL31, RPL34, RPL37A, RPL5, RPL7, RPS10, RPS11, RPS12, RPS15, RPS16, RPS21, RPS5, RPS8, SELT]
GO:0050732	negative regulation of peptidyl-tyrosine phosphorylation	GO_BiologicalProcess-GOA_09.02.2016_16h18	0.0018	0.0086	[7, 8, 9, 10, 11]	21.9512	9	[DMTN, ERRFI1, GPRC5A, PIBF1, PPP2R1A, PSEN1, RACK1, SPINK1, ZGPAT]
GO:1902652	secondary alcohol metabolic process	GO_BiologicalProcess-GOA_09.02.2016_16h18	0.0018	0.0088	[5]	14.2857	20	[ABCA1, ACLY, AKR1D1, APOA2, APOC1, APOC3, APOF, APP, ERLIN1, FDPS, HMGCR, LBR, MBTPS1, MBTPS2, MSMO1, MVD, MVK, SCARB1, SORL1, VDAC2]
GO:0050794	regulation of cellular process	GO_BiologicalProcess-GOA_09.02.2016_16h18	0.0019	0.0088	[2, 3]	7.50496	795	[ABAT, ABCA1, ABCF1, ABHD2, ABL1, ACADM, ACIN1, ACLY, ACOT11, ACSL1, ACSL3, ACSL4, ACTB, ADAMTSL4, ADD1, ADGRA3, ADGRG3, ADNP, AFAP1, AFF1, AFF4, AGPAT1, AHSG, AK1, AKAP8, AKR1B10, AKR1C1, AKR1C2, AKT1, AKT1S1, ALMS1, ALPK3, ANAPC10, ANK2, ANKRD52, ANLN, ANXA4, ANXA7, AP1G1, APH1A, APOA2, APOBEC3C, APOC1, APOC3, APOM, APP, ARAP1, ARF1, ARFRP1, ARGLU1, ARHGAP11A, ARHGAP35, ARHGEF11, ARHGEF28, ARID…
GO:0016236	macroautophagy	GO_BiologicalProcess-GOA_09.02.2016_16h18	0.0019	0.0089	[3]	11.2637	41	[ACIN1, ALKBH5, ASB2, ATG2B, ATG9A, ATPIF1, BNIP3, CHMP4B, CTSK, EVA1B, FAM13B, FEZ2, HIF1A, LRRK2, MAP1LC3B, MDH1, MEX3C, MTSS1, MYLK, NR2C2, PDK1, PIP4K2C, PRKAB1, PSEN1, QSOX1, RAB1B, SLC1A4, SLC37A4, SNRPB, TEAD4, TECPR1, TOMM20, TOMM70A, TSC1, UBC, VAMP8, VDAC1, WAC, WIPI1, ZBTB17, ZNF189]
GO:0051129	negative regulation of cellular component organization	GO_BiologicalProcess-GOA_09.02.2016_16h18	0.0019	0.0089	[3, 4, 5]	10.0295	68	[ADD1, AKT1, ANAPC10, APOA2, APOC1, APOC3, ARAP1, ATAD2, AURKAIP1, BCL2L1, BMP4, BNIP3, BRCA1, BUD31, CAPZB, CHMP4B, DAB2IP, DDX3X, DKK1, DLC1, DMTN, DNAJB1, DNAJB2, DUSP1, EFNA1, FAM21C, FEZ2, FKBPL, FOXA2, GFI1, GMFB, HPN, ID1, IKBKB, KDM4A, LRP4, LRRK2, LYPLA1, LYPLAL1, MSH2, NCAPG, NGEF, NOL3, NRP1, NUMB, PPP3CA, PSEN1, PSMG2, RAB29, RACK1, RDX, RNF6, SNX3, SORL1, STMN1, SUPT6H, TBC1D7, TBCD,…
GO:0033158	regulation of protein import into nucleus, translocation	GO_BiologicalProcess-GOA_09.02.2016_16h18	0.0019	0.0091	[6, 7, 8, 9, 10, 11]	30	6	[BRCA1, CDK1, CDKN1A, JAK2, MBD4, MED1]
GO:0042176	regulation of protein catabolic process	GO_BiologicalProcess-GOA_09.02.2016_16h18	0.002	0.0092	[4, 5, 6]	10.9756	45	[AKT1, ANAPC10, ARIH2, ATPIF1, AXIN1, AZIN1, BARD1, CDK1, DAB2IP, DDRGK1, DNAJB2, DUSP1, EZR, GPC3, GPLD1, LPCAT1, LRRK2, MYCBP2, NEDD4L, NFE2L2, NKD1, PBK, PSEN1, PSMA3, PSMA5, PSMA7, PSMB4, PSMC5, PSME3, PSMG2, RACK1, RAD23B, RDX, SF3B3, SNX3, SORL1, SOX9, TNFAIP3, TRIB3, TTK, UBC, UBE2C, UFL1, UQCC2, WAC]
GO:0097067	cellular response to thyroid hormone stimulus	GO_BiologicalProcess-GOA_09.02.2016_16h18	0.002	0.0092	[5, 6]	35.7143	5	[BMP4, CTSL, MBD4, MED1, RDX]
GO:0036010	protein localization to endosome	GO_BiologicalProcess-GOA_09.02.2016_16h18	0.002	0.0092	[6]	35.7143	5	[EZR, NRP1, RAB35, RDX, SORL1]
GO:0043393	regulation of protein binding	GO_BiologicalProcess-GOA_09.02.2016_16h18	0.002	0.0092	[4]	13.2597	24	[ABL1, ADD1, ADNP, APP, ARRB1, B2M, BMP4, CTHRC1, DAB2IP, DKK1, EIF2AK3, EP300, HNRNPK, ID1, LRRK2, NRP1, PRMT7, PSEN1, RAN, RUVBL2, SENP2, SORL1, TFIP11, TRIB3]
GO:0051170	nuclear import	GO_BiologicalProcess-GOA_09.02.2016_16h18	0.0021	0.0096	[7]	11.7057	35	[AKT1, AXIN1, BMP4, BRCA1, C8orf4, CDK1, CDKN1A, CEP57, CRY2, CSE1L, CYLD, DAB2IP, DDX58, ECT2, JAK2, KPNA1, LITAF, MBD4, MBTPS1, MED1, NCKIPSD, NFKBIB, NFKBIE, NOL3, NUP107, NUP155, NUP58, PDIA3, POU5F1, PPP3CA, RAN, RPL10, SLC11A1, SLC6A4, STAT3]
GO:0044093	positive regulation of molecular function	GO_BiologicalProcess-GOA_09.02.2016_16h18	0.0021	0.0096	[3]	8.68655	166	[ABL1, ACSL1, ADD1, ADNP, AKR1B10, AKT1, ANAPC10, ANK2, APH1A, APOA2, APOC1, APP, ARAP1, ARF1, ARHGAP11A, ARHGAP35, ARHGEF11, ARHGEF28, ARRB1, ARRDC3, AXIN1, AZIN1, B2M, BAZ1B, BMP4, BNIP2, BRAF, BUD31, CAB39, CCL16, CCND1, CCT2, CD40, CDC42EP1, CDK1, CDKN1A, CEBPG, CLPX, CRKL, CRTC2, CTHRC1, DAB2IP, DAP, DCUN1D2, DDRGK1, DDX3X, DDX58, DEPDC1, DKC1, DLC1, DLG1, DNAJA3, DNAJB1, DNAJB11, DOCK7, ECT…
GO:0010604	positive regulation of macromolecule metabolic process	GO_BiologicalProcess-GOA_09.02.2016_16h18	0.002	0.0096	[3, 4, 5]	8.28675	252	[ABCF1, ABL1, ACSL1, ACTA2, ACTB, ADNP, AFF1, AKT1, ANAPC10, ANK2, APOA2, APP, ARAP1, ARHGEF11, ARID1B, ARIH2, ARNTL2, ARRB1, ARRDC3, ASXL1, ASXL2, ATAD2, ATPIF1, AURKAIP1, AXIN1, BACH1, BAG1, BARD1, BAZ1B, BMP4, BNIP2, BPTF, BRAF, BRCA1, BRIP1, BRMS1L, BUD31, C3, CAB39, CASK, CCL16, CCNA2, CCND1, CCT2, CD40, CDK1, CDKN1A, CEBPG, CEP290, CHCHD2, CHD8, CLPX, CLSTN1, COQ7, CREB3L3, CREBBP, CRKL, CR…
GO:0034250	positive regulation of cellular amide metabolic process	GO_BiologicalProcess-GOA_09.02.2016_16h18	0.002	0.0096	[4, 5, 6]	15.1786	17	[ABCF1, DDX3X, EIF5A, EPRS, NFE2L2, NSUN4, PABPC1, PIWIL2, POU5F1, PPP1R15A, PTAFR, RACK1, RPS6KB1, UHMK1, UPF3A, UQCC2, YTHDF2]
GO:0031123	RNA 3'-end processing	GO_BiologicalProcess-GOA_09.02.2016_16h18	0.002	0.0096	[6, 7, 8]	15.1786	17	[APP, BARD1, CPSF1, CPSF6, CPSF7, DHX38, DKC1, EXOSC7, NUDT21, PABPC1, RPS21, SNRPB, SRSF3, SRSF4, SRSF7, SSU72, TNRC6B]
GO:0043124	negative regulation of I-kappaB kinase/NF-kappaB signaling	GO_BiologicalProcess-GOA_09.02.2016_16h18	0.0021	0.0096	[5, 6, 7, 8]	18.9655	11	[ABL1, CYLD, DAB2IP, DNAJA3, LITAF, NFKBIB, NFKBID, RIPK1, RPL10, TNFAIP3, TNIP1]
GO:0051647	nucleus localization	GO_BiologicalProcess-GOA_09.02.2016_16h18	0.0021	0.0097	[4]	25.9259	7	[CDC42BPA, DOCK7, HHEX, MYH10, SUN2, TACC1, TACC2]
GO:0006888	ER to Golgi vesicle-mediated transport	GO_BiologicalProcess-GOA_09.02.2016_16h18	0.0021	0.0098	[6, 7]	13.1868	24	[ANK2, ARF1, CNIH1, COG2, COPZ1, DCTN6, DYNC1H1, F5, GBF1, HYOU1, MIA3, PPP6R3, PTGES2, RAB1B, RAB29, RAB35, SEC24C, SLC6A4, SORL1, TBC1D20, TFG, TRAPPC4, VTI1A, YKT6]
GO:0008652	cellular amino acid biosynthetic process	GO_BiologicalProcess-GOA_09.02.2016_16h18	0.0021	0.0099	[4, 5, 6, 7, 8]	15.534	16	[ABAT, ADI1, ADSL, ATPIF1, CPS1, CYP21A2, EIF2B2, EIF2B4, ENOPH1, GATM, GGT1, GOT1, MTHFD1, MTR, PSAT1, SEPHS2]
GO:0006325	chromatin organization	GO_BiologicalProcess-GOA_09.02.2016_16h18	0.0022	0.0099	[4, 5]	9.79112	75	[ACTB, ARID1B, ARRB1, ASF1B, ASXL1, ASXL2, ATAD2, BAZ1A, BAZ1B, BPTF, BRCA1, BRD2, BRMS1L, CCND1, CDK1, CHD4, CHD8, CHRAC1, CREBBP, CRTC2, DDB1, EHMT1, EIF4E, EP300, FOXA2, GATAD2B, GDNF, GFI1, HCFC1, HIST1H2AC, HIST2H2BE, HUWE1, ITGB3BP, IWS1, JADE2, JAK2, KAT6A, KDM4A, KDM7A, KMT2C, KMT2D, LDB1, MBD2, MCM2, MCM7, MSL3, MTA2, NASP, NCOA1, PAXIP1, PBRM1, PIWIL2, POU5F1, PRDM4, PRMT7, RCOR1, RNF8,…
GO:0031329	regulation of cellular catabolic process	GO_BiologicalProcess-GOA_09.02.2016_16h18	0.0021	0.0099	[4, 5]	10.2007	61	[ABL1, AKT1, ANAPC10, APOC1, APOC3, ARIH2, ATPIF1, AXIN1, BCL2L1, BNIP3, BPGM, CDK1, CHMP4B, CTSK, DAB2IP, DAP, DDIT4, DDRGK1, DLC1, DNAJB2, DUSP1, ECD, EZR, FEZ2, GPLD1, HIF1A, KDM4A, LRRK2, MAP1LC3B, MIA3, NFE2L2, PABPC1, PBK, PIP4K2C, PSEN1, PSMA3, PSMA5, PSMA7, PSMB4, PSMC5, PSME3, PSMG2, QSOX1, RAB1B, RACK1, RAD23B, RDX, SCARB1, STAT3, TNFAIP3, TNRC6B, TRIB3, TSC1, TTK, UBC, UBE2C, UFL1, UQC…
GO:0010038	response to metal ion	GO_BiologicalProcess-GOA_09.02.2016_16h18	0.0022	0.0099	[4]	11.1111	42	[ABAT, ACADM, ANXA7, APP, ATAT1, B2M, BNIP3, BRAF, C3, CCND1, CDK1, CLIC4, CPS1, CYP21A2, DMTN, DUSP1, ECT2, EDN1, EIF2AK3, GDNF, GPLD1, HIF1A, KHK, LRRK2, MTTP, MYCBP2, NEDD4L, NFKB1, PAWR, PDCD6, PPARG, PPP3CA, S100A16, SDC1, SLC11A2, SLC30A10, SLC30A7, SLC6A4, SOD2, TFR2, TFRC, TINAGL1]
GO:0006473	protein acetylation	GO_BiologicalProcess-GOA_09.02.2016_16h18	0.0022	0.0099	[7, 8]	12.8079	26	[ADSL, ARRB1, ATAT1, BRCA1, CREBBP, CRTC2, EIF4E, EP300, ESCO2, GDNF, HCFC1, IWS1, JADE2, KAT6A, LDB1, MSL3, NAT9, NCOA1, NUPR1, PAXIP1, PIWIL2, RUVBL2, SF3B3, TCF3, TMEM98, VDAC2]
GO:0006369	termination of RNA polymerase II transcription	GO_BiologicalProcess-GOA_09.02.2016_16h18	0.0022	0.0099	[7, 8, 9, 10, 11]	20	10	[CPSF1, CPSF7, DHX38, MAZ, MED18, NUDT21, SNRPB, SRSF3, SRSF4, SRSF7]
GO:0050818	regulation of coagulation	GO_BiologicalProcess-GOA_09.02.2016_16h18	0.0021	0.0099	[3, 4]	15.534	16	[ABAT, ANXA4, DMTN, EDN1, FAM46A, FOXA2, HS3ST5, KNG1, LYN, NFE2L2, PSEN1, RHBDF2, SEPP1, SERPINC1, SERPINE2, UBASH3B]
GO:2001237	negative regulation of extrinsic apoptotic signaling pathway	GO_BiologicalProcess-GOA_09.02.2016_16h18	0.0021	0.0099	[5, 6, 7, 8, 9]	15.534	16	[AKT1, BCL2L1, BRCA1, GDNF, ITGA6, ITGAV, MCL1, NOL3, NRP1, PSME3, RIPK1, RPS6KB1, SH3RF1, SIAH2, SLC6A4, TNFAIP3]
GO:0072524	pyridine-containing compound metabolic process	GO_BiologicalProcess-GOA_09.02.2016_16h18	0.0022	0.01	[4]	13.5802	22	[BPGM, DDIT4, DERA, DHTKD1, DLST, ECD, ENO1, GPD1L, HIF1A, MDH1, ME2, MIA3, NAMPT, OGDH, PDHB, PFKFB1, PFKL, PGD, PSAT1, RPE, SLC6A4, STAT3]
GO:0032386	regulation of intracellular transport	GO_BiologicalProcess-GOA_09.02.2016_16h18	0.0023	0.01	[4, 5]	10	66	[ABL1, ACSL3, AKT1, ANK2, ARF1, ARIH2, ATPIF1, AXIN1, BARD1, BMP4, BRAF, BRCA1, C8orf4, CDK1, CDKN1A, CEP290, CTSK, CYLD, DAB2IP, DDX58, DMTN, E2F1, ECT2, EZR, GSTO1, HUWE1, IWS1, JAK2, KPNA1, LAMP1, LITAF, LRRK2, LYN, LYPLA1, LYPLAL1, MAP1B, MBD4, MBTPS1, MED1, MIEF1, NAPB, NDEL1, NDRG4, NFKBIB, NFKBIE, NOL3, NUP58, PLAGL2, POU5F1, PPP3CA, RAB29, RACK1, RDX, RPL10, SLC6A4, SNX3, SORL1, SUPT6H, T…
GO:0000289	nuclear-transcribed mRNA poly(A) tail shortening	GO_BiologicalProcess-GOA_09.02.2016_16h18	0.0024	0.01	[8, 9, 10, 11]	22.8571	8	[CNOT3, CNOT6L, EIF4B, EIF4E, EIF4G1, MLH1, PABPC1, TNRC6B]
GO:0007015	actin filament organization	GO_BiologicalProcess-GOA_09.02.2016_16h18	0.0023	0.01	[5, 6]	11.3043	39	[ABL1, ADD1, ALMS1, ARAP1, ARF1, ARPC3, ARRB1, BRAF, BUD31, CAPZB, CDC42EP1, CFL2, COBLL1, DBN1, DLC1, DLG1, DMTN, DSTN, EMP2, EPHA1, EZR, FAM21C, FAT1, GMFB, ID1, IQGAP2, JAK2, MTSS1, NCAPG, NEDD9, PAWR, PRKCI, RDX, TNFAIP1, TSC1, VASP, VIL1, WASF1, WASL]
GO:0007219	Notch signaling pathway	GO_BiologicalProcess-GOA_09.02.2016_16h18	0.0024	0.01	[5, 6]	12.5581	27	[ANXA4, APH1A, APP, ARRB1, C8orf4, CCND1, CREBBP, E2F1, EP300, ERH, FOXA2, GOT1, HHEX, HIF1A, MIB2, NUMB, POFUT1, PSEN1, PTP4A3, RBM15, RPL10, SOX9, STAT3, TBX2, TNRC6B, TSPAN14, UBC]
GO:0030638	polyketide metabolic process	GO_BiologicalProcess-GOA_09.02.2016_16h18	0.0023	0.01	[3, 4]	44.4444	4	[AKR1B10, AKR1C1, AKR1C2, AKR7A2]
GO:0030647	aminoglycoside antibiotic metabolic process	GO_BiologicalProcess-GOA_09.02.2016_16h18	0.0023	0.01	[5, 6]	44.4444	4	[AKR1B10, AKR1C1, AKR1C2, AKR7A2]
GO:0019693	ribose phosphate metabolic process	GO_BiologicalProcess-GOA_09.02.2016_16h18	0.0023	0.01	[4, 5]	10.2431	59	[ABCA1, ADNP, ADSL, AK1, APOC3, APRT, ATP5G2, ATP5I, ATPIF1, BPGM, BUD31, CASK, CEP290, CMPK1, COA6, COQ7, COX5A, DDIT4, DERA, DHODH, DHTKD1, DLG1, ECD, EDN1, ENO1, GNAI2, GNAI3, HIF1A, HMGCR, LRRK2, MIA3, MPP1, MPP2, MSH2, NDUFA10, NDUFA4, NDUFA8, NDUFAB1, NDUFB5, NUCB2, OGDH, PAICS, PANK1, PAPSS2, PDE7A, PFAS, PFKFB1, PFKL, PGD, PMPCB, RACK1, RPE, SLC25A25, STAT3, STOML2, SULT2A1, UCK2, UQCC2, …
GO:1901653	cellular response to peptide	GO_BiologicalProcess-GOA_09.02.2016_16h18	0.0024	0.01	[5, 6]	10.3321	56	[AHSG, AKT1, AKT1S1, APRT, ATP6V0E1, BRAF, CAB39, CCNA2, CPS1, CYP21A2, DAB2IP, EDN1, EIF4B, EIF4E, EIF4G1, ERRFI1, FOXO4, GOT1, GPLD1, HIF1A, HNRNPK, ID1, IGFBP1, JAK2, KLF4, LYN, MARK3, MAX, NAMPT, NFKB1, NUCB2, NUCKS1, PPARG, PRKAB1, PRKCI, PSMA3, PSMA5, PSMA7, PSMB4, PSMC5, PSME3, RAB8A, REPIN1, RPS6KB1, SOCS7, SSTR5, STAT3, STXBP4, THEM4, TINAGL1, TRIB3, TSC1, UBC, VDAC2, WDR83, YBX1]
GO:0009891	positive regulation of biosynthetic process	GO_BiologicalProcess-GOA_09.02.2016_16h18	0.0024	0.01	[3, 4, 5]	8.64642	168	[ABCA1, ABCF1, ACSL3, ADNP, AFF1, AKT1, APOA2, APOC3, APP, ARHGEF11, ARID1B, ARNTL2, ARRB1, ASXL1, ASXL2, ATAD2, AXIN1, BACH1, BAG1, BAZ1B, BMP4, BPTF, BRCA1, BRIP1, BUD31, CASK, CCNA2, CCT2, CD40, CDK1, CEBPG, CEP290, CHCHD2, CHD8, COQ7, CREB3L3, CREBBP, CRTC2, CTDNEP1, DAB2IP, DDAH1, DDRGK1, DDX3X, DDX5, DDX58, DHX33, DKC1, E2F1, EDN1, EGR1, EIF2AK3, EIF5A, EP300, EPRS, ERCC2, ERLIN1, FHL2, FOX…
GO:1903362	regulation of cellular protein catabolic process	GO_BiologicalProcess-GOA_09.02.2016_16h18	0.0024	0.01	[5, 6, 7]	11.7857	33	[AKT1, ANAPC10, ARIH2, ATPIF1, AXIN1, CDK1, DAB2IP, DDRGK1, DNAJB2, DUSP1, EZR, LRRK2, NFE2L2, PBK, PSEN1, PSMA3, PSMA5, PSMA7, PSMB4, PSMC5, PSME3, PSMG2, RACK1, RAD23B, RDX, TNFAIP3, TRIB3, TTK, UBC, UBE2C, UFL1, UQCC2, WAC]
GO:1902531	regulation of intracellular signal transduction	GO_BiologicalProcess-GOA_09.02.2016_16h18	0.0025	0.01	[4, 5, 6]	8.73016	154	[ABCA1, ABL1, ADGRG3, AKR1C2, AKT1, AKT1S1, APOC3, ARAP1, ARHGAP11A, ARHGAP35, ARHGEF11, ARHGEF28, ARRB1, AURKAIP1, AXIN1, BCL2L1, BMP4, BNIP2, BRAF, BUD31, C3, C3orf33, C8orf4, CAPZB, CASP10, CBL, CC2D1A, CCDC6, CCL16, CD40, CDK1, CDK12, CREBBP, CRKL, CRLF1, CYLD, DAB2IP, DDIT4, DDRGK1, DDX3X, DDX5, DFNA5, DLC1, DLG1, DNAJA3, DUSP1, DUSP10, DUSP14, ECT2, EDN1, EFNA1, EIF2AK3, ERRFI1, EZR, FAM13B…
GO:2001233	regulation of apoptotic signaling pathway	GO_BiologicalProcess-GOA_09.02.2016_16h18	0.0023	0.01	[4, 5, 6, 7]	10.8235	46	[AKT1, ATPIF1, BCL2L1, BNIP3, BRCA1, CYLD, DAB2IP, DDX3X, DFNA5, E2F1, EIF2AK3, GDNF, HIF1A, HNRNPK, HSPH1, HYOU1, ITGA6, ITGAV, JAK2, LRRK2, MCL1, MIF, NFE2L2, NOL3, NRP1, P4HB, PDIA3, PIAS4, PLAGL2, PPP2R1A, PSEN1, PSME3, RACK1, RIPK1, RPS6KB1, SEPT4, SERINC3, SFPQ, SH3RF1, SIAH2, SLC6A4, SOD2, TMEM161A, TNFAIP3, VDAC2, YWHAH]
GO:0031396	regulation of protein ubiquitination	GO_BiologicalProcess-GOA_09.02.2016_16h18	0.0023	0.01	[7, 8, 9, 10]	11.7241	34	[ABL1, ANAPC10, ARRB1, ARRDC3, AXIN1, BRCA1, CDK1, DCUN1D2, DNAJA3, DNAJB2, DUSP1, FANCI, LRRK2, PAXIP1, PSEN1, PSMA3, PSMA5, PSMA7, PSMB4, PSMC5, PSME3, PSMG2, SENP2, SEPT4, SIAH2, TBC1D7, TNFAIP3, TOPORS, TRIB3, TTK, UBC, UBE2C, UBE2L3, UFL1]
GO:0019856	pyrimidine nucleobase biosynthetic process	GO_BiologicalProcess-GOA_09.02.2016_16h18	0.0023	0.01	[5, 6, 7, 8]	44.4444	4	[CMPK1, CPS1, CYP21A2, DHODH]
GO:0006207	'de novo' pyrimidine nucleobase biosynthetic process	GO_BiologicalProcess-GOA_09.02.2016_16h18	0.0023	0.01	[6, 7, 8, 9]	44.4444	4	[CMPK1, CPS1, CYP21A2, DHODH]
GO:0016055	Wnt signaling pathway	GO_BiologicalProcess-GOA_09.02.2016_16h18	0.0024	0.01	[5, 6]	10.5932	50	[ABL1, ARL4D, AXIN1, CCND1, CHD8, CSNK1G2, CSNK2B, CTDNEP1, CTHRC1, CYLD, DAB2IP, DCDC2, DDB1, DDX3X, DKK1, EGR1, HHEX, HMGXB4, IGFBP1, IGFBP6, KLF4, KREMEN1, LDB1, LRP4, LRRK2, MBD2, NFKB1, NKD1, PIAS4, PLPP3, POU5F1, PPP2R1A, PSEN1, PSMA3, PSMA5, PSMA7, PSMB4, PSMC5, PSME3, RACK1, ROR1, SDC1, SENP2, SIAH2, SNX3, SOX9, TMEM198, TRPM4, UBC, ZRANB1]
GO:0045833	negative regulation of lipid metabolic process	GO_BiologicalProcess-GOA_09.02.2016_16h18	0.0023	0.01	[3, 4, 5, 6]	16.4706	14	[AKT1, APOA2, APOC1, APOC3, ATP1A1, BRCA1, DAB2IP, ERLIN1, GFI1, GPLD1, LPCAT1, NFKB1, PIBF1, TRIB3]
GO:0043407	negative regulation of MAP kinase activity	GO_BiologicalProcess-GOA_09.02.2016_16h18	0.0023	0.01	[6, 7, 8, 9, 10, 11, 12]	17.1053	13	[BMP4, DAB2IP, DUSP1, DUSP10, DUSP14, HMGCR, LYN, PDCD4, PPP2R1A, SORL1, SPRED2, SPRY1, STK38]
GO:0045792	negative regulation of cell size	GO_BiologicalProcess-GOA_09.02.2016_16h18	0.0023	0.01	[5, 6]	44.4444	4	[AKT1, AKT1S1, RDX, TSC1]
GO:0022027	interkinetic nuclear migration	GO_BiologicalProcess-GOA_09.02.2016_16h18	0.0023	0.01	[5, 6, 7, 8, 9, 10]	44.4444	4	[DOCK7, HHEX, TACC1, TACC2]
GO:0035337	fatty-acyl-CoA metabolic process	GO_BiologicalProcess-GOA_09.02.2016_16h18	0.0025	0.011	[5, 6]	19.6078	10	[ACLY, ACOT11, ACSL1, ACSL3, ACSL4, ELOVL6, FAR1, PPT1, SLC25A1, THEM4]
GO:0046949	fatty-acyl-CoA biosynthetic process	GO_BiologicalProcess-GOA_09.02.2016_16h18	0.0026	0.011	[6, 7]	20.9302	9	[ACLY, ACOT11, ACSL1, ACSL3, ACSL4, ELOVL6, PPT1, SLC25A1, THEM4]
GO:0006895	Golgi to endosome transport	GO_BiologicalProcess-GOA_09.02.2016_16h18	0.0025	0.011	[6, 7, 8]	28.5714	6	[DOPEY2, GBF1, PTGES2, RAB29, SORT1, WIPI1]
GO:1903729	regulation of plasma membrane organization	GO_BiologicalProcess-GOA_09.02.2016_16h18	0.0026	0.011	[4, 5, 6]	16.8831	13	[ACSL3, AKT1, BCL2L1, DLG1, EZR, LYPLA1, LYPLAL1, NUMB, PRKCI, RACK1, VAMP8, VIL1, WASL]
GO:1902806	regulation of cell cycle G1/S phase transition	GO_BiologicalProcess-GOA_09.02.2016_16h18	0.0026	0.011	[6, 7]	13.4146	22	[AKT1, C8orf4, CCND1, CDKN1A, CREBBP, DDX3X, E2F1, ECD, GIGYF2, PLCB1, PSMA3, PSMA5, PSMA7, PSMB4, PSMC5, PSME3, RDX, SENP2, STXBP4, TCF3, UBC, ZNF655]
GO:0072521	purine-containing compound metabolic process	GO_BiologicalProcess-GOA_09.02.2016_16h18	0.0028	0.011	[4]	10.0486	62	[ABCA1, ADNP, ADSL, AK1, APOC3, APRT, ATP5G2, ATP5I, ATPIF1, BPGM, BUD31, CASK, CEP290, COA6, COQ7, COX5A, DCK, DDIT4, DHTKD1, DLG1, ECD, EDN1, ENO1, G6PC, GNAI2, GNAI3, GNMT, HIF1A, HMGCR, LRRK2, MAT1A, MIA3, MPP1, MPP2, MSH2, MTHFD1, NDUFA10, NDUFA4, NDUFA8, NDUFAB1, NDUFB5, NUCB2, OAS1, OGDH, PAICS, PANK1, PAPSS2, PDE7A, PFAS, PFKFB1, PFKL, PMPCB, RACK1, SLC17A1, SLC22A11, SLC25A25, SLC2A9, ST…
GO:0048869	cellular developmental process	GO_BiologicalProcess-GOA_09.02.2016_16h18	0.0026	0.011	[3]	8.0065	345	[ABCA1, ABL1, ACADM, ACIN1, ACSL4, ACTA2, ACTB, ADD1, ADGRG3, ADNP, AFF4, AKR1C1, AKR1C2, AKT1, ALKBH5, ALPK3, ANK2, ANKRD52, ANLN, ANXA4, ANXA7, AP1G1, AP1S2, APH1A, APP, ARAP1, ARF1, ARHGAP35, ARHGEF11, ARHGEF28, ARIH2, ARL4D, ARPC3, ASB2, ASF1B, ASXL1, ASXL2, ATAT1, ATPIF1, AXIN1, AZI2, B2M, BAG1, BCL2L1, BLOC1S6, BMP4, BNIP2, BNIP3, BRAF, BUD31, CACNA1D, CAPZB, CASP10, CCDC47, CCNB1IP1, CCND1…
GO:0009895	negative regulation of catabolic process	GO_BiologicalProcess-GOA_09.02.2016_16h18	0.0025	0.011	[3, 4, 5]	12.0968	30	[AKT1, ANAPC10, APOA2, APOC1, APOC3, AZIN1, BCL2L1, CHMP4B, DAB2IP, DAP, DDIT4, DLC1, DUSP1, FEZ2, GPLD1, KDM4A, LRRK2, MYCBP2, PABPC1, PBK, PSEN1, PSMG2, QSOX1, SF3B3, SNX3, STAT3, TSC1, TTK, UBE2C, WAC]
GO:0031330	negative regulation of cellular catabolic process	GO_BiologicalProcess-GOA_09.02.2016_16h18	0.0028	0.011	[4, 5, 6]	12.7551	25	[AKT1, ANAPC10, APOC1, APOC3, BCL2L1, CHMP4B, DAB2IP, DAP, DDIT4, DLC1, DUSP1, FEZ2, GPLD1, KDM4A, LRRK2, PABPC1, PBK, PSEN1, PSMG2, QSOX1, STAT3, TSC1, TTK, UBE2C, WAC]
GO:0050793	regulation of developmental process	GO_BiologicalProcess-GOA_09.02.2016_16h18	0.0026	0.011	[2, 3]	8.47384	196	[ABCA1, ABL1, ACIN1, ADNP, AHSG, AKT1, ANXA7, APP, ARAP1, ARF1, ARHGAP35, ASXL1, ASXL2, ATAT1, AXIN1, BLOC1S6, BMP2K, BMP4, BNIP2, BNIP3, BRAF, BRCA1, BUD31, C3, C8orf4, CAPZB, CCND1, CD40, CDC42EP1, CDH5, CDK1, CLSTN1, CLSTN3, CNOT3, COPS2, CTHRC1, CUL7, CYLD, DAB2IP, DBN1, DCDC2, DDAH1, DDX5, DHODH, DKK1, DLC1, DLG1, DMTN, DOCK7, DPYSL2, DUSP10, E2F1, ECT2, EDN1, EFNA1, EGR1, EIF2AK3, EIF4E, EI…
GO:0097285	cell-type specific apoptotic process	GO_BiologicalProcess-GOA_09.02.2016_16h18	0.0026	0.011	[6]	10.4628	52	[ABL1, ADNP, AKT1, AKT1S1, APP, ARRB1, ATN1, BAG1, BCL2L1, BMP4, BNIP3, BRAF, CD40, CHD8, CRLF1, CTSL, DAB2IP, DNAJA3, E2F1, EDN1, GDNF, HIF1A, HMGCR, HYOU1, JAK2, LYN, MAX, MCL1, MERTK, MIF, MSH2, NFE2L2, NFKBID, NOL3, NQO1, NRP1, NSMF, PAWR, PDCD4, PIAS4, PPT1, PRKCI, PSEN1, RBM10, RIPK1, SLC6A4, SOD2, SORT1, SOX9, STK17A, TNFAIP3, XRCC2]
GO:0055088	lipid homeostasis	GO_BiologicalProcess-GOA_09.02.2016_16h18	0.0026	0.011	[5]	14.1791	19	[ABCA1, ABCG5, ACAD9, ACADM, ACADS, AKR1C1, APOA2, APOC3, APOM, G6PC, GNAI2, GOT1, HPN, IVD, MTTP, PPARG, SCARB1, SLC37A4, TMEM97]
GO:0000422	mitophagy	GO_BiologicalProcess-GOA_09.02.2016_16h18	0.0026	0.011	[3, 4, 5, 6, 7]	12.3348	28	[ACIN1, ASB2, ATG2B, ATG9A, ATPIF1, BNIP3, CTSK, EVA1B, FAM13B, FUNDC1, HIF1A, MAP1LC3B, MDH1, MEX3C, MYLK, NR2C2, PDK1, SLC1A4, SLC37A4, SNRPB, TOMM20, TOMM70A, UBC, USP30, VDAC1, WIPI1, ZBTB17, ZNF189]
GO:0061726	mitochondrion disassembly	GO_BiologicalProcess-GOA_09.02.2016_16h18	0.0026	0.011	[5, 6]	12.3348	28	[ACIN1, ASB2, ATG2B, ATG9A, ATPIF1, BNIP3, CTSK, EVA1B, FAM13B, FUNDC1, HIF1A, MAP1LC3B, MDH1, MEX3C, MYLK, NR2C2, PDK1, SLC1A4, SLC37A4, SNRPB, TOMM20, TOMM70A, UBC, USP30, VDAC1, WIPI1, ZBTB17, ZNF189]
GO:0098869	cellular oxidant detoxification	GO_BiologicalProcess-GOA_09.02.2016_16h18	0.0025	0.011	[3, 6]	16.2791	14	[APOM, CYGB, DLC1, GPX2, GPX3, GPX7, GSTO1, GSTZ1, MGST2, NFE2L2, NQO1, PRDX3, PRDX6, SOD2]
GO:0072527	pyrimidine-containing compound metabolic process	GO_BiologicalProcess-GOA_09.02.2016_16h18	0.0025	0.011	[4]	16.2791	14	[APOBEC3C, CMPK1, CPS1, CYP21A2, DCK, DHODH, DUT, ERH, MBD4, NEIL2, RRM1, SLC19A2, UCK2, UNG]
GO:0051346	negative regulation of hydrolase activity	GO_BiologicalProcess-GOA_09.02.2016_16h18	0.0025	0.011	[4, 5, 6]	10.7306	47	[ABL1, AHSG, AKT1, APOA2, APOC1, APOC3, APP, ARRB1, ATPIF1, AURKAIP1, C3, CEP192, CRY2, DAB2IP, DDX3X, DNAJA3, GPC3, HPN, IKBKB, IQGAP2, ITIH5, KLF4, KNG1, LRRK2, MPP2, MYO1D, NOL3, OXA1L, PPP1R15A, PRDX3, RDX, RIPK1, RTKN, SERPINA3, SERPINC1, SERPINE2, SH3RF1, SIAH2, SLC6A4, SORL1, SORT1, SPINK1, SPRY1, TERF2, VDAC2, VIL1, ZCCHC9]
GO:0031124	mRNA 3'-end processing	GO_BiologicalProcess-GOA_09.02.2016_16h18	0.0025	0.011	[7, 8, 9]	16.2791	14	[APP, BARD1, CPSF1, CPSF6, CPSF7, DHX38, NUDT21, PABPC1, SNRPB, SRSF3, SRSF4, SRSF7, SSU72, TNRC6B]
GO:0045727	positive regulation of translation	GO_BiologicalProcess-GOA_09.02.2016_16h18	0.0028	0.011	[5, 6, 7, 8, 9]	15.625	15	[ABCF1, DDX3X, EIF5A, EPRS, NSUN4, PABPC1, PIWIL2, POU5F1, PPP1R15A, PTAFR, RPS6KB1, UHMK1, UPF3A, UQCC2, YTHDF2]
GO:0009611	response to wounding	GO_BiologicalProcess-GOA_09.02.2016_16h18	0.0028	0.011	[3]	9.18728	104	[ABAT, ABHD2, ABL1, ACTB, AHSG, AKR1C1, AKT1, APP, ARRB1, BLOC1S6, BMP4, BPTF, BRAF, C3, CABLES1, CAPZB, CASK, CBX5, CCL16, CD40, CDK1, CEACAM1, CFI, CLSTN1, CREB3L3, CYP19A1, CYP4F2, DMTN, DUSP10, EDN1, F5, FAM46A, FOXA2, GGT1, GNAI1, GNAI2, GNAI3, HIF1A, HMGCR, ID3, IGFBP1, IL1R1, IRF2, ITGA6, ITGAV, JAK2, KIAA1715, KIF23, KIF3A, KIF3C, KIF5A, KLF4, KNG1, L1CAM, LAMC1, LOX, LYN, MAX, MCAM, MERT…
GO:0000083	regulation of transcription involved in G1/S transition of mitotic cell cycle	GO_BiologicalProcess-GOA_09.02.2016_16h18	0.0026	0.011	[5, 6, 7, 8, 9, 10, 11, 12]	25	7	[BACH1, BRIP1, CDK1, CDT1, E2F1, GFI1, RRM2]
GO:0048678	response to axon injury	GO_BiologicalProcess-GOA_09.02.2016_16h18	0.0026	0.011	[4]	16.8831	13	[BRAF, CDK1, GNAI2, JAK2, KLF4, LAMC1, LYN, MAX, MTR, NDEL1, NREP, SOD2, TINAGL1]
GO:0033119	negative regulation of RNA splicing	GO_BiologicalProcess-GOA_09.02.2016_16h18	0.0026	0.011	[5, 6, 7, 8, 9, 10]	25	7	[ACIN1, HNRNPK, PTBP1, RBM10, SFSWAP, SRSF4, SRSF7]
GO:0008630	intrinsic apoptotic signaling pathway in response to DNA damage	GO_BiologicalProcess-GOA_09.02.2016_16h18	0.0027	0.011	[5, 6, 7, 8]	14.7826	17	[ABL1, BCL2L1, BRCA1, CDKN1A, DDIT4, E2F1, EP300, HNRNPK, MCL1, MIF, MLH1, MSH2, NUPR1, PIAS4, SOD2, TMEM161A, TOPORS]
GO:0032768	regulation of monooxygenase activity	GO_BiologicalProcess-GOA_09.02.2016_16h18	0.0025	0.011	[5, 6]	17.6471	12	[AKT1, CYGB, DDAH1, GDNF, GFI1, HIF1A, LYPLA1, NFKB1, SCARB1, TERF2, VDAC2, WASL]
GO:0006733	oxidoreduction coenzyme metabolic process	GO_BiologicalProcess-GOA_09.02.2016_16h18	0.003	0.012	[5]	13.253	22	[BPGM, COQ7, DDIT4, DERA, DHTKD1, DLST, ECD, ENO1, GPD1L, HIF1A, HMGCR, MDH1, ME2, MIA3, NAMPT, OGDH, PDHB, PFKFB1, PFKL, PGD, RPE, STAT3]
GO:1904375	regulation of protein localization to cell periphery	GO_BiologicalProcess-GOA_09.02.2016_16h18	0.0029	0.012	[5, 6]	17.3913	12	[ACSL3, AKT1, BCL2L1, DLG1, EZR, LYPLA1, LYPLAL1, NUMB, PRKCI, RACK1, VAMP8, VIL1]
GO:1903076	regulation of protein localization to plasma membrane	GO_BiologicalProcess-GOA_09.02.2016_16h18	0.0029	0.012	[5, 6, 7]	17.3913	12	[ACSL3, AKT1, BCL2L1, DLG1, EZR, LYPLA1, LYPLAL1, NUMB, PRKCI, RACK1, VAMP8, VIL1]
GO:0009416	response to light stimulus	GO_BiologicalProcess-GOA_09.02.2016_16h18	0.0029	0.012	[4]	10.8108	44	[AKR1B10, AKR1C1, AKT1, AP1S2, APOA2, APOC3, APOM, APP, ARRB1, BRAF, CACNA2D4, CCND1, CDC25A, CDKN1A, CREBBP, CRY2, DCDC2, DDB1, DTL, DUSP1, E2F1, EP300, ERCC2, GPC3, HIF1A, HMGCR, KIAA0101, MAP4K3, MAPRE2, MSH2, NAPEPLD, NDRG4, PBK, PLEKHB1, POLQ, PPP1R15A, RNF7, RUVBL2, SDC1, SDF4, SLC6A4, TMEM161A, TTR, YY1]
GO:0071375	cellular response to peptide hormone stimulus	GO_BiologicalProcess-GOA_09.02.2016_16h18	0.003	0.012	[5, 6, 7]	10.3053	54	[AHSG, AKT1, AKT1S1, APRT, ATP6V0E1, BRAF, CAB39, CCNA2, CPS1, CYP21A2, DAB2IP, EDN1, EIF4B, EIF4E, EIF4G1, ERRFI1, FOXO4, GOT1, GPLD1, HIF1A, HNRNPK, IGFBP1, JAK2, LYN, MARK3, MAX, NAMPT, NFKB1, NUCB2, NUCKS1, PPARG, PRKAB1, PRKCI, PSMA3, PSMA5, PSMA7, PSMB4, PSMC5, PSME3, RAB8A, REPIN1, RPS6KB1, SOCS7, SSTR5, STAT3, STXBP4, THEM4, TINAGL1, TRIB3, TSC1, UBC, VDAC2, WDR83, YBX1]
GO:0031325	positive regulation of cellular metabolic process	GO_BiologicalProcess-GOA_09.02.2016_16h18	0.0029	0.012	[3, 4, 5]	8.22764	253	[ABAT, ABCA1, ABCF1, ABL1, ACLY, ACSL1, ACSL3, ADNP, AFF1, AGPAT1, AKT1, ANAPC10, APOA2, APOC1, APOC3, APP, ARAP1, ARHGEF11, ARID1B, ARIH2, ARNTL2, ARRB1, ARRDC3, ASXL1, ASXL2, ATAD2, ATPIF1, AURKAIP1, AXIN1, BACH1, BAG1, BAZ1B, BMP4, BNIP2, BNIP3, BPTF, BRAF, BRCA1, BRIP1, BRMS1L, BUD31, C3, CAB39, CASK, CCL16, CCNA2, CCND1, CCT2, CD40, CDK1, CDKN1A, CEBPG, CEP290, CHCHD2, CHD8, CLPX, COQ7, CREB…
GO:0051005	negative regulation of lipoprotein lipase activity	GO_BiologicalProcess-GOA_09.02.2016_16h18	0.0031	0.012	[6, 7, 8]	60	3	[APOC1, APOC3, SORT1]
GO:0006720	isoprenoid metabolic process	GO_BiologicalProcess-GOA_09.02.2016_16h18	0.0031	0.012	[4, 5]	13.9706	19	[ADH4, ADH5, AKR1B10, AKR1C1, APOA2, APOC3, APOM, E2F1, FDPS, GPC3, HMGCR, MVD, MVK, NAPEPLD, PECR, PHYH, RETSAT, SDC1, TTR]
GO:2000273	positive regulation of receptor activity	GO_BiologicalProcess-GOA_09.02.2016_16h18	0.0029	0.012	[4, 5, 6, 7]	19.2308	10	[BAZ1B, BUD31, GSTO1, MBD4, MED1, NOL3, RELN, SCAF1, SLC6A4, SOX9]
GO:0051351	positive regulation of ligase activity	GO_BiologicalProcess-GOA_09.02.2016_16h18	0.0029	0.012	[4, 5, 6]	15.0943	16	[ANAPC10, ARRDC3, AXIN1, CDK1, DCUN1D2, PSMA3, PSMA5, PSMA7, PSMB4, PSMC5, PSME3, TOPORS, TRIB3, UBC, UBE2C, UBE2L3]
GO:0030035	microspike assembly	GO_BiologicalProcess-GOA_09.02.2016_16h18	0.0031	0.012	[5]	60	3	[ABL1, FGD4, MTSS1]
GO:0030705	cytoskeleton-dependent intracellular transport	GO_BiologicalProcess-GOA_09.02.2016_16h18	0.0031	0.012	[5, 6]	14.2857	18	[APP, BLOC1S6, HIF1A, KIF1C, KIF3A, KIF3C, KIF5A, LAMP1, MAP1B, NDEL1, SLC6A4, SUN2, TRAF3IP1, TTC26, TUBA1B, TUBA1C, TUBB, WASL]
GO:0006084	acetyl-CoA metabolic process	GO_BiologicalProcess-GOA_09.02.2016_16h18	0.003	0.012	[5, 6]	22.2222	8	[ACLY, ACSS1, DLST, MVD, MVK, PDHB, PDK1, PIPOX]
GO:0042908	xenobiotic transport	GO_BiologicalProcess-GOA_09.02.2016_16h18	0.0031	0.012	[4, 5]	60	3	[ABCB1, NR1I2, SLC2A1]
GO:1902953	positive regulation of ER to Golgi vesicle-mediated transport	GO_BiologicalProcess-GOA_09.02.2016_16h18	0.0031	0.012	[5, 6, 7, 8, 9]	60	3	[ARF1, SORL1, TBC1D20]
GO:1902966	positive regulation of protein localization to early endosome	GO_BiologicalProcess-GOA_09.02.2016_16h18	0.0031	0.012	[3, 4, 5, 6, 7, 8, 9]	60	3	[EZR, RDX, SORL1]
GO:1902965	regulation of protein localization to early endosome	GO_BiologicalProcess-GOA_09.02.2016_16h18	0.0031	0.012	[5, 6, 8]	60	3	[EZR, RDX, SORL1]
GO:0070389	chaperone cofactor-dependent protein refolding	GO_BiologicalProcess-GOA_09.02.2016_16h18	0.0031	0.012	[4]	60	3	[BAG1, DNAJB1, PTGES3]
GO:0090630	activation of GTPase activity	GO_BiologicalProcess-GOA_09.02.2016_16h18	0.003	0.012	[6, 7, 8]	22.2222	8	[DOCK7, ECT2, EPHA1, NDEL1, PLEKHG4, SYDE2, TBC1D7, TSC1]
GO:0051174	regulation of phosphorus metabolic process	GO_BiologicalProcess-GOA_09.02.2016_16h18	0.0032	0.013	[4, 5]	8.6413	159	[ABCA1, ABL1, ACSL1, ACSL3, ADNP, AHSG, AKT1, AKT1S1, APOC1, APOC3, APP, ARF1, ARRB1, ATPIF1, AXIN1, BAG1, BARD1, BMP4, BNIP2, BPGM, BRAF, BUD31, C3, C3orf33, CAB39, CAMK2N1, CCDC6, CCL16, CCNA2, CCND1, CD40, CDC25A, CDK1, CDK12, CDKN1A, CEP192, CEP290, CKS2, CRKL, CRLF1, CRY2, CSNK2B, DAB2IP, DDIT4, DDRGK1, DKK1, DLC1, DLG1, DMTN, DNAJA3, DOCK7, DUSP1, DUSP10, DUSP14, ECD, ECT2, EDN1, EFNA1, EIF…
GO:0090003	regulation of establishment of protein localization to plasma membrane	GO_BiologicalProcess-GOA_09.02.2016_16h18	0.0034	0.013	[5, 6, 7, 8]	18.8679	10	[ACSL3, AKT1, BCL2L1, DLG1, EZR, LYPLA1, LYPLAL1, PRKCI, RACK1, VIL1]
GO:0009068	aspartate family amino acid catabolic process	GO_BiologicalProcess-GOA_09.02.2016_16h18	0.0033	0.013	[6, 7, 8, 9, 10]	27.2727	6	[ALDH7A1, DLST, GCAT, GOT1, OGDH, PIPOX]
GO:0043044	ATP-dependent chromatin remodeling	GO_BiologicalProcess-GOA_09.02.2016_16h18	0.0033	0.013	[7, 8]	17.1429	12	[ACTB, CHD4, CHD8, GATAD2B, ITGB3BP, MBD2, MTA2, NASP, RNF8, SMARCA5, SMARCC2, SMARCD2]
GO:0009299	mRNA transcription	GO_BiologicalProcess-GOA_09.02.2016_16h18	0.0033	0.013	[6, 7, 8, 9, 10]	27.2727	6	[DDX5, HIF1A, MBD4, MED1, MIA3, POU5F1]
GO:0071396	cellular response to lipid	GO_BiologicalProcess-GOA_09.02.2016_16h18	0.0032	0.013	[5]	10.4925	49	[ABCA1, ABL1, AKR1C2, AKT1, ATP1A1, B2M, BMP4, BUD31, CCNA2, CD40, CPS1, CXCL16, CYP21A2, DAB2IP, E2F1, EDN1, ERRFI1, GFI1, GNAI1, GPLD1, HIF1A, HNRNPK, JAK2, KLF4, LITAF, LYN, MBD4, MED1, MIF, NFKB1, NFKBIB, NR1I2, NR2C2, OSR1, PAWR, PLSCR4, PPARG, PTAFR, RUVBL2, SCARB1, SLC6A4, SOX9, SPON2, SSTR5, THRB, TINAGL1, TNFAIP3, TRIM5, UBE2L3]
GO:0000060	protein import into nucleus, translocation	GO_BiologicalProcess-GOA_09.02.2016_16h18	0.0034	0.013	[5, 6, 7, 8, 9, 10]	18.8679	10	[AKT1, BRCA1, CDK1, CDKN1A, CEP57, JAK2, MBD4, MED1, RAN, SLC11A1]
GO:0007595	lactation	GO_BiologicalProcess-GOA_09.02.2016_16h18	0.0032	0.013	[4, 5, 6, 7, 8]	18.0328	11	[APRT, CCND1, COPS2, DHODH, EIF2AK3, HIF1A, MBD4, MED1, MYCBP2, NCOA1, SLC29A1]
GO:0043090	amino acid import	GO_BiologicalProcess-GOA_09.02.2016_16h18	0.0033	0.013	[6, 7, 8, 9, 10]	27.2727	6	[KCNJ10, SLC11A1, SLC6A4, SLC6A9, SLC7A2, TINAGL1]
GO:0044242	cellular lipid catabolic process	GO_BiologicalProcess-GOA_09.02.2016_16h18	0.0034	0.013	[4, 5]	12.5628	25	[ACAD9, ACADM, ACADS, AKR1B10, AKT1, APOA2, APOC1, APOC3, CPS1, CYP21A2, CYP4F12, CYP4F2, DECR1, ECH1, ENPP7, GPLD1, HACL1, HADH, HADHB, IVD, NAPEPLD, PHYH, PPT1, PRDX6, SCARB1]
GO:1900407	regulation of cellular response to oxidative stress	GO_BiologicalProcess-GOA_09.02.2016_16h18	0.0033	0.013	[4, 5, 6]	17.1429	12	[AKT1, DLC1, HIF1A, HSPH1, LRRK2, MCL1, NFE2L2, NOL3, P4HB, RACK1, SFPQ, SOD2]
GO:0030218	erythrocyte differentiation	GO_BiologicalProcess-GOA_09.02.2016_16h18	0.0032	0.013	[4, 6, 7, 8, 9]	14.9533	16	[ACIN1, ADD1, ATPIF1, BMP4, CEBPG, DMTN, ERCC2, HIF1A, JAK2, LDB1, LYN, MBD4, MED1, MIA3, SFXN1, SLC11A2]
GO:0070482	response to oxygen levels	GO_BiologicalProcess-GOA_09.02.2016_16h18	0.0032	0.013	[3]	11.0795	39	[ABAT, ADSL, AKT1, ALKBH5, BACH1, BNIP3, BRIP1, BUD31, CA9, CCNA2, CDKN1A, CHCHD2, CREBBP, CYGB, DDIT4, E2F1, EDN1, EGR1, EP300, ERCC2, ERO1A, FUNDC1, HIF1A, HYOU1, MIA3, MYCBP2, NOL3, P4HB, PDK1, PPARG, PPP1R15A, SLC11A2, SLC29A1, SLC6A4, SOD2, TFRC, TSC1, UBC, UBE2D2]
GO:0045930	negative regulation of mitotic cell cycle	GO_BiologicalProcess-GOA_09.02.2016_16h18	0.0036	0.014	[4, 5, 6]	11.811	30	[ABL1, ANAPC10, AURKAIP1, BCL2L1, BMP4, CCNA2, CCND1, CDK1, CDKN1A, DLG1, DUSP1, FANCI, FOXO4, GDNF, GIGYF2, MDC1, MSH2, PSMA3, PSMA5, PSMA7, PSMB4, PSMC5, PSME3, PSMG2, SYF2, TTK, UBC, UBE2C, ZNF655, ZWINT]
GO:0090068	positive regulation of cell cycle process	GO_BiologicalProcess-GOA_09.02.2016_16h18	0.0037	0.014	[4, 5, 6]	11.6981	31	[APP, BRCA1, CCND1, CDKN1A, CREBBP, DAB2IP, DDX3X, ECT2, EDN1, FOXO4, KIF23, MBD4, MED1, NUSAP1, PIWIL2, PLCB1, PSMA3, PSMA5, PSMA7, PSMB4, PSMC5, PSME3, RAB11A, RAD51B, RDX, SFPQ, SSTR5, STXBP4, UBC, UBE2C, UHRF2]
GO:0006612	protein targeting to membrane	GO_BiologicalProcess-GOA_09.02.2016_16h18	0.0035	0.014	[5, 6, 7, 8]	12.381	26	[ANK2, ARL4D, CHMP4B, DMTN, MIEF1, PRKCI, RPL10, RPL13, RPL15, RPL18, RPL23A, RPL31, RPL34, RPL37A, RPL5, RPL7, RPS10, RPS11, RPS12, RPS15, RPS16, RPS21, RPS5, RPS8, SPCS3, SRP14]
GO:0006206	pyrimidine nucleobase metabolic process	GO_BiologicalProcess-GOA_09.02.2016_16h18	0.0036	0.014	[5, 6, 7]	21.6216	8	[CMPK1, CPS1, CYP21A2, DCK, DHODH, DUT, RRM1, UCK2]
GO:0000910	cytokinesis	GO_BiologicalProcess-GOA_09.02.2016_16h18	0.0036	0.014	[4, 5]	12.8492	23	[AKT1, ANLN, ARHGEF11, BCL2L1, CCND1, CDKN1A, CUL7, DAB2IP, ECT2, GIT1, KIF23, MCM2, MYH10, NEK6, NUSAP1, RAB11A, RAB11FIP4, RAB35, SNX18, SON, SSTR5, STIL, STMN1]
GO:1901699	cellular response to nitrogen compound	GO_BiologicalProcess-GOA_09.02.2016_16h18	0.0037	0.014	[4]	9.63061	73	[ABL1, AHSG, AKT1, AKT1S1, APP, APRT, ATP6V0E1, BCL2L1, BRAF, BRCA1, CAB39, CCNA2, COL4A6, CPS1, CYP21A2, DAB2IP, DDC, DMTN, EDN1, EGR1, EIF4B, EIF4E, EIF4G1, ERRFI1, EZR, FOXO4, GOT1, GPLD1, HIF1A, HNRNPK, ID1, IGFBP1, JAK2, KLF4, LRRK2, LYN, MARK3, MAX, MTR, NAMPT, NFKB1, NSMF, NUCB2, NUCKS1, PPARG, PPP1R15A, PRKAB1, PRKCI, PSMA3, PSMA5, PSMA7, PSMB4, PSMC5, PSME3, PTAFR, RAB8A, REPIN1, RPS6KB1…
GO:0009792	embryo development ending in birth or egg hatching	GO_BiologicalProcess-GOA_09.02.2016_16h18	0.0036	0.014	[4, 5]	9.79532	67	[ACSL4, ADD1, AKT1, ANKRD11, ARHGAP35, ASXL2, AXIN1, BCL2L1, BMP4, BNIP2, BPTF, BRCA1, CCNB1IP1, CHD8, CNOT3, COQ7, CTHRC1, DDX5, DKK1, DLC1, DLG1, DSCAML1, EDN1, EP300, ERCC2, FOXA2, GINS1, HHEX, HIF1A, IFT52, KIF3A, KMT2D, MBD4, MBNL1, MED1, MIA3, MSH2, MTHFD1, MTSS1, MYH10, NASP, NCOA1, NDEL1, NKD1, OSR1, PLOD3, POFUT1, POU5F1, PSEN1, PSMA7, RAD51B, RBBP6, SATB2, SENP2, SLC6A4, STIL, SYF2, TAF…
GO:0034379	very-low-density lipoprotein particle assembly	GO_BiologicalProcess-GOA_09.02.2016_16h18	0.0036	0.014	[4, 5, 7]	40	4	[ACSL3, APOC1, APOC3, ARF1]
GO:0006475	internal protein amino acid acetylation	GO_BiologicalProcess-GOA_09.02.2016_16h18	0.0036	0.014	[8, 9]	12.8492	23	[ADSL, ARRB1, ATAT1, BRCA1, CREBBP, CRTC2, EIF4E, EP300, GDNF, HCFC1, IWS1, JADE2, KAT6A, LDB1, MSL3, NCOA1, PAXIP1, PIWIL2, RUVBL2, SF3B3, TCF3, TMEM98, VDAC2]
GO:1990748	cellular detoxification	GO_BiologicalProcess-GOA_09.02.2016_16h18	0.0035	0.014	[2, 5]	15.7303	14	[APOM, CYGB, DLC1, GPX2, GPX3, GPX7, GSTO1, GSTZ1, MGST2, NFE2L2, NQO1, PRDX3, PRDX6, SOD2]
GO:1902883	negative regulation of response to oxidative stress	GO_BiologicalProcess-GOA_09.02.2016_16h18	0.0036	0.014	[3, 4, 5, 6]	20	9	[AKT1, DLC1, HIF1A, HSPH1, LRRK2, NFE2L2, NOL3, RACK1, SOD2]
GO:1900408	negative regulation of cellular response to oxidative stress	GO_BiologicalProcess-GOA_09.02.2016_16h18	0.0036	0.014	[3, 4, 5, 6, 7]	20	9	[AKT1, DLC1, HIF1A, HSPH1, LRRK2, NFE2L2, NOL3, RACK1, SOD2]
GO:0043666	regulation of phosphoprotein phosphatase activity	GO_BiologicalProcess-GOA_09.02.2016_16h18	0.0036	0.014	[6, 7, 8, 9, 10]	17.7419	11	[CRY2, IKBKB, JAK2, PAWR, PPP1R15A, PPP1R2, PPP2R1A, PPP2R2C, PPP6R3, SLC6A4, TSC1]
GO:0042996	regulation of Golgi to plasma membrane protein transport	GO_BiologicalProcess-GOA_09.02.2016_16h18	0.0036	0.014	[4, 5, 6, 7, 8, 9, 10]	40	4	[ACSL3, LYPLA1, LYPLAL1, RACK1]
GO:0007175	negative regulation of epidermal growth factor-activated receptor activity	GO_BiologicalProcess-GOA_09.02.2016_16h18	0.0036	0.014	[5, 6, 7, 8, 9, 10, 11, 12, 13]	40	4	[ERRFI1, GPRC5A, PSEN1, ZGPAT]
GO:0019220	regulation of phosphate metabolic process	GO_BiologicalProcess-GOA_09.02.2016_16h18	0.0039	0.015	[5, 6]	8.60746	157	[ABCA1, ABL1, ACSL1, ACSL3, ADNP, AHSG, AKT1, AKT1S1, APOC1, APOC3, APP, ARF1, ARRB1, ATPIF1, AXIN1, BAG1, BARD1, BMP4, BNIP2, BPGM, BRAF, BUD31, C3, C3orf33, CAB39, CAMK2N1, CCDC6, CCL16, CCNA2, CCND1, CD40, CDC25A, CDK1, CDK12, CDKN1A, CEP192, CEP290, CKS2, CRKL, CRLF1, CRY2, CSNK2B, DAB2IP, DDIT4, DDRGK1, DKK1, DLC1, DLG1, DMTN, DNAJA3, DOCK7, DUSP1, DUSP10, DUSP14, ECD, ECT2, EDN1, EFNA1, EIF…
GO:0017038	protein import	GO_BiologicalProcess-GOA_09.02.2016_16h18	0.0038	0.015	[4, 5, 6]	11.0465	38	[AKT1, AXIN1, BMP4, BRCA1, C8orf4, CDK1, CDKN1A, CEP57, CRY2, CSE1L, CYLD, DAB2IP, DDX58, ECT2, HSPA4, JAK2, KPNA1, LITAF, MBD4, MBTPS1, MED1, NCKIPSD, NFKBIB, NFKBIE, NOL3, NUP107, NUP155, NUP58, PDIA3, PEX10, POU5F1, PPP3CA, RAN, RPL10, SLC11A1, SLC6A4, STAT3, TOMM20]
GO:0006281	DNA repair	GO_BiologicalProcess-GOA_09.02.2016_16h18	0.0038	0.015	[3, 5, 6, 7]	10.1887	54	[ABL1, BACH1, BARD1, BAZ1B, BOD1L1, BRCA1, BRIP1, CDK1, CEBPG, COPS2, CRY2, DDB1, DTL, EP300, ERCC2, ESCO2, FANCI, GTF2H3, HUWE1, KDM4A, KIAA0101, LIG1, MBD4, MDC1, MGMT, MLH1, MSH2, NEIL2, NPAS2, PAXIP1, PIAS4, PMS2P3, POLQ, RAD23B, RAD51B, RFC3, RNF8, RUVBL2, SFPQ, SMARCA5, TERF2, TFIP11, TMEM161A, TRIM25, TRIP13, TTC5, UBC, UBE2F, UBE2T, UHRF1, UNG, USP7, XRCC2, YY1]
GO:0042789	mRNA transcription from RNA polymerase II promoter	GO_BiologicalProcess-GOA_09.02.2016_16h18	0.0038	0.015	[7, 8, 9, 10, 11]	31.25	5	[HIF1A, MBD4, MED1, MIA3, POU5F1]
GO:0043009	chordate embryonic development	GO_BiologicalProcess-GOA_09.02.2016_16h18	0.004	0.015	[5, 6]	9.77778	66	[ADD1, AKT1, ANKRD11, ARHGAP35, ASXL2, AXIN1, BCL2L1, BMP4, BNIP2, BPTF, BRCA1, CCNB1IP1, CHD8, CNOT3, COQ7, CTHRC1, DDX5, DKK1, DLC1, DLG1, DSCAML1, EDN1, EP300, ERCC2, FOXA2, GINS1, HHEX, HIF1A, IFT52, KIF3A, KMT2D, MBD4, MBNL1, MED1, MIA3, MSH2, MTHFD1, MTSS1, MYH10, NASP, NCOA1, NDEL1, NKD1, OSR1, PLOD3, POFUT1, POU5F1, PSEN1, PSMA7, RAD51B, RBBP6, SATB2, SENP2, SLC6A4, STIL, SYF2, TAF8, TAPT…
GO:0007095	mitotic G2 DNA damage checkpoint	GO_BiologicalProcess-GOA_09.02.2016_16h18	0.0038	0.015	[5, 6, 7, 8, 9, 10, 11]	31.25	5	[CCNA2, CDK1, FANCI, FOXO4, SYF2]
GO:0060548	negative regulation of cell death	GO_BiologicalProcess-GOA_09.02.2016_16h18	0.004	0.015	[3, 4, 5]	9.21569	94	[ABL1, ADNP, AKT1, ANXA4, ARRB1, BAG1, BARD1, BCL2L1, BFAR, BMP4, BNIP2, BNIP3, BRAF, BRCA1, CBL, CDK1, CDKN1A, CHD8, CHMP4B, CRLF1, DDB1, DDX3X, DNAJA3, DUSP1, EDN1, EIF2AK3, FHL2, GDNF, GLO1, GOLPH3, HIF1A, HMGCR, HNRNPK, HPN, HSPH1, HYOU1, ID1, IKBKB, ITGA6, ITGAV, JAK2, KLF4, LRRK2, MBD4, MCL1, MED1, MERTK, MGMT, MIF, MSH2, MYO18A, NFE2L2, NFKB1, NOL3, NPAS2, NRP1, OSR1, PDCD4, PIM3, PLAC8, P…
GO:0043066	negative regulation of apoptotic process	GO_BiologicalProcess-GOA_09.02.2016_16h18	0.004	0.015	[5, 6, 7]	9.32476	87	[ABL1, ADNP, AKT1, ANXA4, ARRB1, BAG1, BARD1, BCL2L1, BFAR, BMP4, BNIP2, BNIP3, BRAF, BRCA1, CBL, CDK1, CDKN1A, CHD8, CRLF1, DDB1, DDX3X, DNAJA3, DUSP1, EDN1, EIF2AK3, FHL2, GDNF, GLO1, GOLPH3, HIF1A, HMGCR, HNRNPK, HPN, HSPH1, HYOU1, ID1, IKBKB, ITGA6, ITGAV, JAK2, KLF4, LRRK2, MBD4, MCL1, MED1, MERTK, MIF, MSH2, MYO18A, NFE2L2, NFKB1, NOL3, NRP1, OSR1, PDCD4, PIM3, PLAC8, PPT1, PRDX3, PRKCI, PS…
GO:0034375	high-density lipoprotein particle remodeling	GO_BiologicalProcess-GOA_09.02.2016_16h18	0.0038	0.015	[4, 5, 7]	31.25	5	[APOA2, APOC1, APOC3, APOM, SCARB1]
GO:0006508	proteolysis	GO_BiologicalProcess-GOA_09.02.2016_16h18	0.0039	0.015	[4, 5]	8.68531	146	[ADAMTSL4, AHSG, AKR1C1, AKT1, ANAPC10, APH1A, APP, ARIH2, ARRB1, ASB2, ASXL1, ATPIF1, AURKAIP1, AXIN1, BFAR, BLMH, C3, CAPN1, CAPN7, CAPN8, CASP10, CBL, CCDC47, CDK1, CFI, CHMP4B, CLPX, COPS2, CPS1, CPVL, CTSK, CTSL, CTSV, CUL7, CYLD, CYP21A2, DAB2IP, DAP, DDB1, DDRGK1, DDX3X, DLC1, DNAJA3, DNAJB2, DTL, DUSP1, E2F1, EIF2AK3, ERLIN1, GAN, GGT1, GPC3, GPLD1, HECTD4, HGFAC, HPN, HUWE1, IFT52, ITIH5…
GO:0018205	peptidyl-lysine modification	GO_BiologicalProcess-GOA_09.02.2016_16h18	0.0038	0.015	[7, 8]	10.6132	45	[ARRB1, ASXL2, ATAT1, BRCA1, CREBBP, CRTC2, EGR1, EHMT1, EIF4E, EIF5A, EP300, GDNF, GFI1, HCFC1, HNRNPK, IWS1, JADE2, KAT6A, KDM4A, KMT2C, KMT2D, LDB1, MDC1, MIA3, MSL3, NCOA1, NUP107, NUP155, NUP210, NUP37, NUP58, PAXIP1, PIAS4, PIWIL2, RUVBL2, SENP2, SENP5, SF3B3, SUPT6H, TCF3, TMEM98, TOPORS, TRPM4, VDAC2, ZNF335]
GO:0061162	establishment of monopolar cell polarity	GO_BiologicalProcess-GOA_09.02.2016_16h18	0.0038	0.015	[5]	31.25	5	[EZR, GBF1, MAP1B, PRKCI, PTGES2]
GO:0048872	homeostasis of number of cells	GO_BiologicalProcess-GOA_09.02.2016_16h18	0.0039	0.015	[4]	11.6541	31	[ABL1, ACIN1, ADD1, AKT1, ATPIF1, BMP4, CEBPG, CLSTN1, DMTN, DNAJA3, ERCC2, GIGYF2, HIF1A, IKBKB, JAK2, KIF3A, LDB1, LYN, MBD4, MED1, MIA3, MIF, MTHFD1, RAC3, RPL10, SFXN1, SLC11A2, SLC37A4, SOX9, TNFAIP3, UBAP2L]
GO:0060333	interferon-gamma-mediated signaling pathway	GO_BiologicalProcess-GOA_09.02.2016_16h18	0.0039	0.015	[6, 7]	15.5556	14	[B2M, DNAJA3, GBP2, HLA-A, IFNGR2, IRF2, JAK2, MBD4, MED1, OAS1, PPARG, PTAFR, TRIM25, TRIM5]
GO:0070498	interleukin-1-mediated signaling pathway	GO_BiologicalProcess-GOA_09.02.2016_16h18	0.0038	0.015	[6, 7]	31.25	5	[EGR1, IKBKB, IL1R1, IL1RN, PLCB1]
GO:0035428	hexose transmembrane transport	GO_BiologicalProcess-GOA_09.02.2016_16h18	0.0038	0.015	[5, 6, 7, 8]	31.25	5	[SLC2A1, SLC2A10, SLC2A2, SLC2A3, SLC2A9]
GO:1904659	glucose transmembrane transport	GO_BiologicalProcess-GOA_09.02.2016_16h18	0.0038	0.015	[6, 7, 8, 9]	31.25	5	[SLC2A1, SLC2A10, SLC2A2, SLC2A3, SLC2A9]
GO:0051084	'de novo' posttranslational protein folding	GO_BiologicalProcess-GOA_09.02.2016_16h18	0.0039	0.015	[4]	18.5185	10	[ACTB, CCT2, DNAJB1, ERO1A, HSPH1, TBCD, TUBA1B, TUBA1C, TUBB, TUBB1]
GO:0046486	glycerolipid metabolic process	GO_BiologicalProcess-GOA_09.02.2016_16h18	0.0042	0.016	[4, 5]	10.6024	44	[ACLY, ACOT11, ACSL1, ACSL3, ACSL4, AGPAT1, APOA2, APOC1, APOC3, ARF1, C3, CLSTN1, CPS1, CRLS1, CTDNEP1, CYP21A2, ELOVL6, FAR1, G6PC, GPAA1, GPD1L, GPLD1, HADHB, IMPAD1, INPP1, IP6K2, LPCAT1, MOGAT2, MTMR6, MTTP, PIGN, PIGO, PIK3C2B, PIP4K2C, PLCB1, PNPLA6, PPT1, SCARB1, SERINC3, SLC25A1, SLC37A4, SLC44A2, STOML2, THEM4]
GO:0006900	membrane budding	GO_BiologicalProcess-GOA_09.02.2016_16h18	0.0043	0.016	[4, 5]	13.8462	18	[ARF1, CHMP4B, CNIH1, COPZ1, F5, GBF1, GOLPH3, MYO18A, PPP6R3, PRKCI, PTGES2, RAB1B, SEC24C, SNX3, TBC1D20, TFG, TRAPPC4, WASL]
GO:0006903	vesicle targeting	GO_BiologicalProcess-GOA_09.02.2016_16h18	0.0044	0.016	[3, 5, 6]	15.3846	14	[ARF1, CNIH1, COPZ1, F5, GBF1, PPP6R3, PSEN1, PTGES2, RAB1B, SEC24C, TFG, TRAPPC4, WIPI1, YKT6]
GO:0006633	fatty acid biosynthetic process	GO_BiologicalProcess-GOA_09.02.2016_16h18	0.0045	0.016	[5, 6, 7, 8, 9]	13.0435	21	[ACLY, ACSL3, ACSS1, APOC1, APOC3, BRCA1, EDN1, ELOVL6, ERLIN1, GGT1, HSD17B8, MGST2, MIF, MSMO1, NDUFAB1, PECR, PIBF1, PRKAB1, PTGES2, PTGES3, TRIB3]
GO:0022904	respiratory electron transport chain	GO_BiologicalProcess-GOA_09.02.2016_16h18	0.0043	0.016	[4, 5, 6]	13.5714	19	[ACAD9, ATP5G2, ATP5I, COA6, COQ7, COX5A, COX7A2L, COX7C, CYC1, NDUFA10, NDUFA4, NDUFA8, NDUFAB1, NDUFAF3, NDUFB5, NUBPL, PMPCB, SOD2, UQCRC1]
GO:0051254	positive regulation of RNA metabolic process	GO_BiologicalProcess-GOA_09.02.2016_16h18	0.0041	0.016	[4, 5, 6, 7, 8]	8.72567	139	[AFF1, AKT1, APP, ARHGEF11, ARID1B, ARNTL2, ARRB1, ASXL1, ASXL2, ATAD2, AXIN1, BACH1, BAG1, BAZ1B, BMP4, BPTF, BRCA1, BRIP1, BUD31, CASK, CCNA2, CD40, CEBPG, CEP290, CHCHD2, CHD8, COQ7, CREB3L3, CREBBP, CRTC2, DAB2IP, DAZAP1, DDRGK1, DDX3X, DDX5, DDX58, DHX33, E2F1, EDN1, EGR1, EIF2AK3, EP300, ERCC2, ERLIN1, FHL2, FOXA2, FOXO4, FUBP3, GDNF, GTF2H3, HCFC1, HEATR1, HHEX, HIF1A, HMBOX1, HNRNPK, HPN,…
GO:1902680	positive regulation of RNA biosynthetic process	GO_BiologicalProcess-GOA_09.02.2016_16h18	0.0043	0.016	[5, 6, 7, 8, 9]	8.74036	136	[AFF1, AKT1, APP, ARHGEF11, ARID1B, ARNTL2, ARRB1, ASXL1, ASXL2, ATAD2, AXIN1, BACH1, BAG1, BAZ1B, BMP4, BPTF, BRCA1, BRIP1, BUD31, CASK, CCNA2, CD40, CEBPG, CEP290, CHCHD2, CHD8, COQ7, CREB3L3, CREBBP, CRTC2, DAB2IP, DDRGK1, DDX3X, DDX5, DDX58, DHX33, E2F1, EDN1, EGR1, EIF2AK3, EP300, ERCC2, ERLIN1, FHL2, FOXA2, FOXO4, FUBP3, GDNF, GTF2H3, HCFC1, HEATR1, HHEX, HIF1A, HMBOX1, HNRNPK, HPN, HSPH1, …
GO:0045893	positive regulation of transcription, DNA-templated	GO_BiologicalProcess-GOA_09.02.2016_16h18	0.0041	0.016	[5, 6, 7, 8, 9, 10, 11]	8.7639	134	[AFF1, AKT1, APP, ARHGEF11, ARID1B, ARNTL2, ARRB1, ASXL1, ASXL2, ATAD2, AXIN1, BACH1, BAG1, BAZ1B, BMP4, BPTF, BRCA1, BRIP1, BUD31, CASK, CCNA2, CD40, CEBPG, CEP290, CHCHD2, CHD8, COQ7, CREB3L3, CREBBP, CRTC2, DAB2IP, DDRGK1, DDX3X, DDX5, DDX58, DHX33, E2F1, EDN1, EGR1, EIF2AK3, EP300, ERCC2, ERLIN1, FHL2, FOXA2, FOXO4, FUBP3, GDNF, HCFC1, HEATR1, HHEX, HIF1A, HMBOX1, HNRNPK, HSPH1, ICE2, IKBKB, …
GO:1903508	positive regulation of nucleic acid-templated transcription	GO_BiologicalProcess-GOA_09.02.2016_16h18	0.0041	0.016	[6, 7, 8, 9, 10]	8.7639	134	[AFF1, AKT1, APP, ARHGEF11, ARID1B, ARNTL2, ARRB1, ASXL1, ASXL2, ATAD2, AXIN1, BACH1, BAG1, BAZ1B, BMP4, BPTF, BRCA1, BRIP1, BUD31, CASK, CCNA2, CD40, CEBPG, CEP290, CHCHD2, CHD8, COQ7, CREB3L3, CREBBP, CRTC2, DAB2IP, DDRGK1, DDX3X, DDX5, DDX58, DHX33, E2F1, EDN1, EGR1, EIF2AK3, EP300, ERCC2, ERLIN1, FHL2, FOXA2, FOXO4, FUBP3, GDNF, HCFC1, HEATR1, HHEX, HIF1A, HMBOX1, HNRNPK, HSPH1, ICE2, IKBKB, …
GO:0042180	cellular ketone metabolic process	GO_BiologicalProcess-GOA_09.02.2016_16h18	0.0043	0.016	[3, 4]	11.3793	33	[ACADM, ADH4, AKR1B10, AKR1C1, AKR1C2, AKR7A2, AKT1, APOC1, APOC3, AZIN1, BRCA1, COQ7, CYP4F2, EIF2AK3, ERLIN1, GLO1, GNMT, HMGCR, HPN, NQO1, NUCB2, PDHB, PDK1, PIBF1, PPARG, PSMA3, PSMA5, PSMA7, PSMB4, PSMC5, PSME3, SLC35B4, TRIB3]
GO:0071407	cellular response to organic cyclic compound	GO_BiologicalProcess-GOA_09.02.2016_16h18	0.0042	0.016	[5]	10.4444	47	[ABCA1, ABL1, AKT1, APP, ATP1A1, AXIN1, BMP4, BRCA1, CCNA2, CPS1, CYP21A2, DMTN, EDN1, EGR1, ERRFI1, EZR, GNAI1, GPLD1, HCFC1, HIF1A, HNRNPK, ID1, JAK2, KLF4, LRRK2, MBD4, MED1, MGMT, NFKB1, NR1I2, NR2C2, PAWR, PPARG, PPP1R15A, PTAFR, RPS6KB1, RUVBL2, SLC16A1, SLC6A4, SMAD9, SP5, SRRT, SSTR5, STAT3, THRB, TINAGL1, UBE2L3]
GO:0016570	histone modification	GO_BiologicalProcess-GOA_09.02.2016_16h18	0.0042	0.016	[3, 4, 5, 6, 7, 8]	10.5023	46	[ARRB1, ASXL1, ASXL2, BAZ1B, BRCA1, BRMS1L, CDK1, CREBBP, CRTC2, DDB1, EHMT1, EIF4E, EP300, GDNF, GFI1, HCFC1, HUWE1, IWS1, JADE2, JAK2, KAT6A, KDM4A, KDM7A, KMT2C, KMT2D, LDB1, MSL3, MTA2, NCOA1, PAXIP1, PIWIL2, PRDM4, PRMT7, RCOR1, RNF8, RUVBL2, SF3B3, SFPQ, SIRT7, SUDS3, SUPT6H, TCF3, TMEM98, UHRF1, WAC, ZNF335]
GO:0043543	protein acylation	GO_BiologicalProcess-GOA_09.02.2016_16h18	0.0043	0.016	[6, 7]	11.9149	28	[ADSL, ARRB1, ATAT1, BRCA1, CREBBP, CRTC2, EIF4E, EP300, ESCO2, GDNF, HCFC1, IWS1, JADE2, KAT6A, LDB1, MSL3, NAT9, NCOA1, NUPR1, PAXIP1, PIWIL2, RUVBL2, SF3B3, TCF3, TMEM98, VDAC2, ZDHHC12, ZDHHC9]
GO:0044262	cellular carbohydrate metabolic process	GO_BiologicalProcess-GOA_09.02.2016_16h18	0.0043	0.016	[3, 4]	11.1111	36	[ACADM, ADNP, AKT1, BPGM, CPS1, CYP21A2, DDIT4, ECD, FOXA2, G6PC, GNMT, GNPTAB, GOT1, GPLD1, HIF1A, IMPAD1, INPP1, KHK, MIA3, MOGAT2, PDK1, PFKFB1, PGD, PHKA2, PPIP5K2, PPP1R2, PTAFR, PTGES3, RBKS, RPE, SLC2A1, SLC35B4, SLC37A4, STAT3, UBC, UGP2]
GO:0046112	nucleobase biosynthetic process	GO_BiologicalProcess-GOA_09.02.2016_16h18	0.0042	0.016	[4, 5, 6, 7]	26.087	6	[APRT, CMPK1, CPS1, CYP21A2, DHODH, PAICS]
GO:0097066	response to thyroid hormone	GO_BiologicalProcess-GOA_09.02.2016_16h18	0.0042	0.016	[4, 5]	26.087	6	[BMP4, CTSL, HPN, MBD4, MED1, RDX]
GO:0032272	negative regulation of protein polymerization	GO_BiologicalProcess-GOA_09.02.2016_16h18	0.0041	0.016	[5, 6, 7, 8, 9]	17.4603	11	[ADD1, CAPZB, DMTN, FAM21C, FKBPL, NCAPG, RDX, STMN1, TBCD, VDAC2, VIL1]
GO:0034622	cellular macromolecular complex assembly	GO_BiologicalProcess-GOA_09.02.2016_16h18	0.0043	0.016	[5]	9.30481	87	[ABL1, ACAD9, ADD1, ANLN, ARF1, ARL4D, ARPC3, ASF1B, ATAT1, ATPAF1, AXIN1, BRD2, CAPZB, CCT2, CDC42EP1, CHMP4B, CNOT6L, COA6, COBLL1, COX20, CSNK2B, DDX3X, DLG1, DMTN, DNAJB11, DYNC1H1, EIF3B, EIF6, EXOC8, FAM21C, FKBPL, GDNF, GMFB, HIST2H2BE, HSPA4, IQGAP2, ITGB3BP, JAK2, KAT6A, LUC7L3, MBD2, MBNL1, MCM2, MCM7, MTSS1, NAPB, NASP, NCAPG, NDEL1, NDUFA10, NDUFA8, NDUFAB1, NDUFAF3, NDUFB5, NOL3, NSU…
GO:1902176	negative regulation of oxidative stress-induced intrinsic apoptotic signaling pathway	GO_BiologicalProcess-GOA_09.02.2016_16h18	0.0042	0.016	[5, 6, 7, 8, 9, 10]	26.087	6	[AKT1, HIF1A, HSPH1, NFE2L2, NOL3, SOD2]
GO:0034605	cellular response to heat	GO_BiologicalProcess-GOA_09.02.2016_16h18	0.0043	0.016	[4, 5]	14.1667	17	[AKT1S1, BAG1, C8orf4, CDKN1A, CREBBP, DNAJB1, EP300, FKBPL, HSPH1, LYN, NUP107, NUP155, NUP210, NUP37, NUP58, PDCD6, PTGES3]
GO:0061041	regulation of wound healing	GO_BiologicalProcess-GOA_09.02.2016_16h18	0.0043	0.016	[5, 6]	13.5714	19	[ABAT, CASK, DMTN, EDN1, FAM46A, FOXA2, HMGCR, KNG1, LYN, MYLK, NFE2L2, PLPP3, RHBDF2, SEPP1, SERPINC1, SERPINE2, TNFAIP3, UBASH3B, VIL1]
GO:0043433	negative regulation of sequence-specific DNA binding transcription factor activity	GO_BiologicalProcess-GOA_09.02.2016_16h18	0.0042	0.016	[4, 6, 7, 8, 9, 10, 11, 12]	13.3333	20	[ADGRG3, ANXA4, ARRB1, BRMS1L, CEBPG, CYLD, DAB2IP, DAP, DNAJA3, FOXA2, GFI1, ID1, ID3, KAT6A, KLF4, NFKBID, PIAS4, TNFAIP3, UFL1, USP7]
GO:0070997	neuron death	GO_BiologicalProcess-GOA_09.02.2016_16h18	0.0041	0.016	[4]	11.1455	36	[ABL1, ADNP, AKT1, AKT1S1, APP, ATN1, BAG1, BCL2L1, BNIP3, BRAF, CHMP4B, CRLF1, DDIT4, GDNF, HIF1A, HYOU1, IKBKB, JAK2, LRRK2, MAX, MCL1, MSH2, NQO1, NRP1, NSMF, PAWR, PPT1, PRKCI, PSEN1, RACK1, SLC6A4, SOD2, SORL1, STAT3, TSC1, XRCC2]
GO:1990090	cellular response to nerve growth factor stimulus	GO_BiologicalProcess-GOA_09.02.2016_16h18	0.0043	0.016	[4, 6]	21.0526	8	[AKT1, APP, BPTF, E2F1, ID1, NFKB1, RAB35, SORT1]
GO:0046209	nitric oxide metabolic process	GO_BiologicalProcess-GOA_09.02.2016_16h18	0.0044	0.016	[4]	15.3846	14	[AKT1, CPS1, CYGB, CYP21A2, DDAH1, EDN1, JAK2, KLF4, LYPLA1, NQO1, SLC7A2, SOD2, VDAC2, WASL]
GO:0009135	purine nucleoside diphosphate metabolic process	GO_BiologicalProcess-GOA_09.02.2016_16h18	0.0047	0.017	[6, 7, 8]	14.4144	16	[AK1, BPGM, CASK, DDIT4, DHTKD1, DLG1, ECD, ENO1, HIF1A, MIA3, MPP1, MPP2, OGDH, PFKFB1, PFKL, STAT3]
GO:0009179	purine ribonucleoside diphosphate metabolic process	GO_BiologicalProcess-GOA_09.02.2016_16h18	0.0047	0.017	[7, 8, 9]	14.4144	16	[AK1, BPGM, CASK, DDIT4, DHTKD1, DLG1, ECD, ENO1, HIF1A, MIA3, MPP1, MPP2, OGDH, PFKFB1, PFKL, STAT3]
GO:0009259	ribonucleotide metabolic process	GO_BiologicalProcess-GOA_09.02.2016_16h18	0.0047	0.017	[5, 6, 7, 8]	10.0179	56	[ABCA1, ADNP, ADSL, AK1, APOC3, APRT, ATP5G2, ATP5I, ATPIF1, BPGM, BUD31, CASK, CEP290, CMPK1, COA6, COQ7, COX5A, DDIT4, DHODH, DHTKD1, DLG1, ECD, EDN1, ENO1, GNAI2, GNAI3, HIF1A, HMGCR, LRRK2, MIA3, MPP1, MPP2, MSH2, NDUFA10, NDUFA4, NDUFA8, NDUFAB1, NDUFB5, NUCB2, OGDH, PAICS, PANK1, PAPSS2, PDE7A, PFAS, PFKFB1, PFKL, PMPCB, RACK1, SLC25A25, STAT3, STOML2, SULT2A1, UCK2, UQCC2, UQCRC1]
GO:0016447	somatic recombination of immunoglobulin gene segments	GO_BiologicalProcess-GOA_09.02.2016_16h18	0.0049	0.018	[4, 5, 7, 8, 9, 10]	19.1489	9	[CD40, MLH1, MSH2, PAXIP1, RNF8, SUPT6H, TCF3, THOC1, UNG]
GO:0055085	transmembrane transport	GO_BiologicalProcess-GOA_09.02.2016_16h18	0.005	0.018	[3, 4, 5]	8.76712	128	[ABCA1, ABCA3, ABCB1, ABCF1, ABCG5, ABL1, ADD1, ADD3, AKT1, ANK2, APOA2, APOC3, ARF1, ATP1A1, ATP5G2, ATP5I, ATP6V0E1, ATP8B2, AZGP1, AZIN1, BMP4, C12orf76, CAB39, CACNA1D, CACNA2D4, CASK, CHRNA2, CLIC4, COA6, COX5A, COX7A2, COX7A2L, COX7C, DLG1, DMTN, EDN1, ERO1A, G6PC, GJB1, GPD1L, GSTO1, HPN, HSPA4, IKBKB, ITGAV, KCNG3, KCNJ10, LASP1, LRRK2, LYN, MAGT1, MCL1, MTMR6, NDUFA4, NEDD4L, NIPAL2, NOL…
GO:0009411	response to UV	GO_BiologicalProcess-GOA_09.02.2016_16h18	0.005	0.018	[5]	13.3803	19	[AKT1, CCND1, CDC25A, CDKN1A, CREBBP, DDB1, DTL, EP300, ERCC2, KIAA0101, MAP4K3, MSH2, PBK, POLQ, PPP1R15A, RUVBL2, SDF4, TMEM161A, YY1]
GO:0032870	cellular response to hormone stimulus	GO_BiologicalProcess-GOA_09.02.2016_16h18	0.0048	0.018	[4, 5]	9.51157	74	[ACSL1, AHSG, AKR1C1, AKR1C2, AKT1, AKT1S1, APRT, ATP1A1, ATP6V0E1, BMP4, BRAF, CAB39, CCNA2, CPS1, CSNK2B, CTSL, CYP21A2, DAB2IP, DUSP1, EDN1, EIF4B, EIF4E, EIF4G1, ERRFI1, FOXO4, GOT1, GPLD1, HIF1A, HNRNPK, IGFBP1, JAK2, LYN, MARK3, MAX, MBD4, MED1, NAMPT, NCOA1, NFKB1, NR1I2, NR2C2, NSMF, NUCB2, NUCKS1, PAWR, PLOD3, PPARG, PRKAB1, PRKCI, PSMA3, PSMA5, PSMA7, PSMB4, PSMC5, PSME3, RAB8A, RDX, RE…
GO:0031572	G2 DNA damage checkpoint	GO_BiologicalProcess-GOA_09.02.2016_16h18	0.005	0.018	[6, 7, 8]	20.5128	8	[BRCA1, CCNA2, CDK1, DTL, FANCI, FOXO4, NEK6, SYF2]
GO:0033238	regulation of cellular amine metabolic process	GO_BiologicalProcess-GOA_09.02.2016_16h18	0.0048	0.018	[4, 5, 6]	15.2174	14	[ABAT, ACSL3, APOC1, AZIN1, HPN, LPCAT1, NQO1, PSMA3, PSMA5, PSMA7, PSMB4, PSMC5, PSME3, SCARB1]
GO:0045922	negative regulation of fatty acid metabolic process	GO_BiologicalProcess-GOA_09.02.2016_16h18	0.0049	0.018	[4, 5, 6, 7, 8, 9, 10]	22.5806	7	[AKT1, APOC1, APOC3, BRCA1, ERLIN1, PIBF1, TRIB3]
GO:0098754	detoxification	GO_BiologicalProcess-GOA_09.02.2016_16h18	0.0048	0.018	[1, 4]	15.2174	14	[APOM, CYGB, DLC1, GPX2, GPX3, GPX7, GSTO1, GSTZ1, MGST2, NFE2L2, NQO1, PRDX3, PRDX6, SOD2]
GO:0061339	establishment or maintenance of monopolar cell polarity	GO_BiologicalProcess-GOA_09.02.2016_16h18	0.0051	0.018	[4]	29.4118	5	[EZR, GBF1, MAP1B, PRKCI, PTGES2]
GO:0071901	negative regulation of protein serine/threonine kinase activity	GO_BiologicalProcess-GOA_09.02.2016_16h18	0.0051	0.018	[7, 8, 9, 10, 11]	13.6364	18	[ABL1, BMP4, CDKN1A, DAB2IP, DUSP1, DUSP10, DUSP14, HHEX, HMGCR, LYN, PDCD4, PPP2R1A, SORL1, SPRED2, SPRY1, STK38, TNFAIP3, UBE2C]
GO:0010661	positive regulation of muscle cell apoptotic process	GO_BiologicalProcess-GOA_09.02.2016_16h18	0.0051	0.018	[6, 7, 8, 9]	29.4118	5	[ARRB1, BNIP3, HMGCR, PDCD4, RBM10]
GO:0030397	membrane disassembly	GO_BiologicalProcess-GOA_09.02.2016_16h18	0.0049	0.018	[4, 5]	19.1489	9	[CDK1, CTDNEP1, NDEL1, NEK6, NUP107, NUP155, NUP210, NUP37, NUP58]
GO:1900034	regulation of cellular response to heat	GO_BiologicalProcess-GOA_09.02.2016_16h18	0.0051	0.018	[4, 5, 6]	15.6627	13	[AKT1S1, BAG1, CREBBP, DNAJB1, EP300, FKBPL, HSPH1, NUP107, NUP155, NUP210, NUP37, NUP58, PTGES3]
GO:0051081	nuclear envelope disassembly	GO_BiologicalProcess-GOA_09.02.2016_16h18	0.0049	0.018	[5, 6]	19.1489	9	[CDK1, CTDNEP1, NDEL1, NEK6, NUP107, NUP155, NUP210, NUP37, NUP58]
GO:0050774	negative regulation of dendrite morphogenesis	GO_BiologicalProcess-GOA_09.02.2016_16h18	0.0051	0.018	[5, 6, 7, 8, 9, 10, 11, 12, 13, 14]	29.4118	5	[EFNA1, ID1, NGEF, PPP3CA, YWHAH]
GO:0060759	regulation of response to cytokine stimulus	GO_BiologicalProcess-GOA_09.02.2016_16h18	0.0049	0.018	[3, 4, 5]	13.1579	20	[AGPAT1, CYLD, DNAJA3, EDN1, GFI1, HIF1A, IFNGR2, IKBKB, IL1RN, JAK2, KLF4, MBD4, MED1, NOL3, PIAS4, PPARG, RACK1, RIPK1, TNFAIP3, UBC]
GO:0090330	regulation of platelet aggregation	GO_BiologicalProcess-GOA_09.02.2016_16h18	0.0051	0.018	[5, 6, 7, 8, 9]	29.4118	5	[ABAT, DMTN, LYN, SERPINE2, UBASH3B]
GO:0071222	cellular response to lipopolysaccharide	GO_BiologicalProcess-GOA_09.02.2016_16h18	0.005	0.018	[5, 6, 8]	12.7168	22	[ABCA1, ABL1, AKT1, B2M, CD40, CXCL16, DAB2IP, GFI1, HIF1A, JAK2, LITAF, LYN, MIF, NFKB1, NFKBIB, PLSCR4, PTAFR, SCARB1, SPON2, TINAGL1, TNFAIP3, TRIM5]
GO:0051052	regulation of DNA metabolic process	GO_BiologicalProcess-GOA_09.02.2016_16h18	0.0052	0.019	[4, 5, 6, 7]	10.7735	39	[AKT1, BMP4, BRCA1, CCT2, CD40, CDK1, CDKN1A, CDT1, CEBPG, DKC1, DUSP1, ENPP7, ESCO2, GDNF, HMBOX1, ID3, KLF4, KPNA1, MGMT, MLH1, MSH2, NPAS2, PAXIP1, POLQ, PPARG, PPP2R1A, RBBP6, RNF8, SENP2, STOML2, SUPT6H, TERF2, TFIP11, THOC1, TMEM161A, TNFAIP1, UNG, USP7, YLPM1]
GO:0019362	pyridine nucleotide metabolic process	GO_BiologicalProcess-GOA_09.02.2016_16h18	0.0053	0.019	[5, 6, 7, 8]	13.0719	20	[BPGM, DDIT4, DERA, DHTKD1, DLST, ECD, ENO1, GPD1L, HIF1A, MDH1, ME2, MIA3, NAMPT, OGDH, PDHB, PFKFB1, PFKL, PGD, RPE, STAT3]
GO:0046496	nicotinamide nucleotide metabolic process	GO_BiologicalProcess-GOA_09.02.2016_16h18	0.0053	0.019	[6, 7, 8, 9]	13.0719	20	[BPGM, DDIT4, DERA, DHTKD1, DLST, ECD, ENO1, GPD1L, HIF1A, MDH1, ME2, MIA3, NAMPT, OGDH, PDHB, PFKFB1, PFKL, PGD, RPE, STAT3]
GO:0043487	regulation of RNA stability	GO_BiologicalProcess-GOA_09.02.2016_16h18	0.0054	0.019	[3, 6, 7]	13.2867	19	[AKT1, CNOT6L, DKC1, E2F1, EIF4G1, EXOSC7, GDNF, PABPC1, PSMA3, PSMA5, PSMA7, PSMB4, PSMC5, PSME3, RBM10, SLC11A1, UBC, YBX1, YTHDF2]
GO:0042157	lipoprotein metabolic process	GO_BiologicalProcess-GOA_09.02.2016_16h18	0.0054	0.019	[4, 5]	13.2867	19	[ABCA1, APOA2, APOC1, APOC3, APOM, GPAA1, ITGAV, LYPLA1, LYPLAL1, MTTP, P4HB, PIGN, PIGO, PPT1, SCARB1, SDC1, WIPI1, ZDHHC12, ZDHHC9]
GO:0009223	pyrimidine deoxyribonucleotide catabolic process	GO_BiologicalProcess-GOA_09.02.2016_16h18	0.0053	0.019	[6, 7, 8, 9, 10, 11]	36.3636	4	[DUT, MBD4, NEIL2, UNG]
GO:0071428	rRNA-containing ribonucleoprotein complex export from nucleus	GO_BiologicalProcess-GOA_09.02.2016_16h18	0.0053	0.019	[5, 6, 7, 9]	36.3636	4	[EIF6, RAN, RPS15, TSC1]
GO:0006261	DNA-dependent DNA replication	GO_BiologicalProcess-GOA_09.02.2016_16h18	0.0054	0.019	[6, 7, 8]	13.2867	19	[BAZ1A, BMP4, BOD1L1, CDT1, DNAJA3, GINS1, GINS3, LIG1, MCM10, MCM2, MCM7, POLQ, PRIM1, PRIM2, RFC3, SENP2, STOML2, TERF2, THOC1]
GO:0009185	ribonucleoside diphosphate metabolic process	GO_BiologicalProcess-GOA_09.02.2016_16h18	0.0056	0.02	[6, 7, 8]	14.1593	16	[AK1, BPGM, CASK, DDIT4, DHTKD1, DLG1, ECD, ENO1, HIF1A, MIA3, MPP1, MPP2, OGDH, PFKFB1, PFKL, STAT3]
GO:0007009	plasma membrane organization	GO_BiologicalProcess-GOA_09.02.2016_16h18	0.0056	0.02	[4, 5]	11.2676	32	[ACSL3, AKT1, ANK2, ARFRP1, BCL2L1, CHMP4B, DLG1, EMP2, EZR, FAT4, GOLPH3, IKBKB, LIN7C, LYPLA1, LYPLAL1, MTSS1, MTSS1L, MYH10, NUMB, PLSCR4, PRKCI, RAB11A, RAB8A, RACK1, RDX, RILPL2, SYT7, TSPAN14, VAMP8, VIL1, WASL, ZFYVE27]
GO:0009896	positive regulation of catabolic process	GO_BiologicalProcess-GOA_09.02.2016_16h18	0.0058	0.02	[3, 4, 5]	10.5263	42	[AKT1, ANAPC10, APOA2, ARIH2, ATPIF1, AXIN1, BARD1, BNIP3, CDK1, DAB2IP, DDRGK1, DNAJB2, EZR, GPC3, GPLD1, HIF1A, LPCAT1, LRRK2, MIA3, NEDD4L, NFE2L2, NKD1, PABPC1, PIP4K2C, PSEN1, PSMA3, PSMA5, PSMA7, PSMB4, PSMC5, PSME3, RACK1, RDX, SORL1, SOX9, TNFAIP3, TNRC6B, TRIB3, UBC, UBE2C, UQCC2, WAC]
GO:1903052	positive regulation of proteolysis involved in cellular protein catabolic process	GO_BiologicalProcess-GOA_09.02.2016_16h18	0.0057	0.02	[6, 7, 8, 9]	12.5714	22	[AKT1, ANAPC10, ARIH2, ATPIF1, AXIN1, CDK1, DAB2IP, DDRGK1, DNAJB2, LRRK2, NFE2L2, PSEN1, PSMA3, PSMA5, PSMA7, PSMB4, PSMC5, PSME3, RACK1, TRIB3, UBC, UBE2C]
GO:0043069	negative regulation of programmed cell death	GO_BiologicalProcess-GOA_09.02.2016_16h18	0.0055	0.02	[4, 5, 6]	9.2161	87	[ABL1, ADNP, AKT1, ANXA4, ARRB1, BAG1, BARD1, BCL2L1, BFAR, BMP4, BNIP2, BNIP3, BRAF, BRCA1, CBL, CDK1, CDKN1A, CHD8, CRLF1, DDB1, DDX3X, DNAJA3, DUSP1, EDN1, EIF2AK3, FHL2, GDNF, GLO1, GOLPH3, HIF1A, HMGCR, HNRNPK, HPN, HSPH1, HYOU1, ID1, IKBKB, ITGA6, ITGAV, JAK2, KLF4, LRRK2, MBD4, MCL1, MED1, MERTK, MIF, MSH2, MYO18A, NFE2L2, NFKB1, NOL3, NRP1, OSR1, PDCD4, PIM3, PLAC8, PPT1, PRDX3, PRKCI, PS…
GO:0019695	choline metabolic process	GO_BiologicalProcess-GOA_09.02.2016_16h18	0.0059	0.02	[4, 6, 7, 8]	50	3	[ALDH7A1, CHDH, DMGDH]
GO:0046822	regulation of nucleocytoplasmic transport	GO_BiologicalProcess-GOA_09.02.2016_16h18	0.0058	0.02	[6, 7]	11.7904	27	[AXIN1, BARD1, BMP4, BRCA1, C8orf4, CDK1, CDKN1A, CYLD, DAB2IP, DDX58, ECT2, IWS1, JAK2, KPNA1, LITAF, MBD4, MBTPS1, MED1, NFKBIB, NFKBIE, NOL3, NUP58, POU5F1, PPP3CA, RPL10, SUPT6H, UHMK1]
GO:0051017	actin filament bundle assembly	GO_BiologicalProcess-GOA_09.02.2016_16h18	0.0055	0.02	[4, 7, 8]	13.5338	18	[ADD1, ALMS1, ARAP1, ARRB1, BRAF, BUD31, DLC1, DMTN, EPHA1, EZR, ID1, MTSS1, NEDD9, PAWR, RDX, TNFAIP1, TSC1, VIL1]
GO:0019395	fatty acid oxidation	GO_BiologicalProcess-GOA_09.02.2016_16h18	0.0055	0.02	[5, 6, 7, 8, 9]	14.5631	15	[ACAD9, ACADM, ACADS, AKT1, CYGB, DECR1, ECH1, HACL1, HADH, HADHB, IVD, NUCB2, PHYH, PPARG, VDAC2]
GO:1902882	regulation of response to oxidative stress	GO_BiologicalProcess-GOA_09.02.2016_16h18	0.0058	0.02	[4, 5]	16	12	[AKT1, DLC1, HIF1A, HSPH1, LRRK2, MCL1, NFE2L2, NOL3, P4HB, RACK1, SFPQ, SOD2]
GO:0007264	small GTPase mediated signal transduction	GO_BiologicalProcess-GOA_09.02.2016_16h18	0.0058	0.02	[5, 6]	9.1858	88	[ABCA1, ABL1, ACTB, AKR1B10, APOC3, ARAP1, ARF1, ARFRP1, ARHGAP11A, ARHGAP35, ARHGEF11, ARHGEF28, ARL16, ARL4D, ARPC3, ARRB1, BNIP2, BRAF, BUD31, CCNA2, CDC42EP1, CDKN1A, CRKL, DAB2IP, DIAPH3, DLC1, DNAJA3, DOCK7, ECT2, FAM13B, FGD4, GBF1, HMHA1, IQGAP2, ITGB3BP, JAK2, KIF5A, LRRK2, MAPKAP1, MARK3, MYH10, MYLK, MYO9B, NCKIPSD, NDEL1, NGEF, NUP107, NUP37, PLEKHG4, PSMA3, PSMA5, PSMA7, PSMB4, PSMC5…
GO:0003129	heart induction	GO_BiologicalProcess-GOA_09.02.2016_16h18	0.0059	0.02	[4, 5, 6, 7, 8, 9, 10, 11]	50	3	[BMP4, DKK1, POU5F1]
GO:0042256	mature ribosome assembly	GO_BiologicalProcess-GOA_09.02.2016_16h18	0.0059	0.02	[6, 7, 8]	50	3	[DDX3X, EIF6, NSUN4]
GO:0098734	macromolecule depalmitoylation	GO_BiologicalProcess-GOA_09.02.2016_16h18	0.0059	0.02	[6]	50	3	[LYPLA1, LYPLAL1, PPT1]
GO:0010216	maintenance of DNA methylation	GO_BiologicalProcess-GOA_09.02.2016_16h18	0.0059	0.02	[5, 6, 7]	50	3	[UHRF1, UHRF2, USP7]
GO:0090308	regulation of methylation-dependent chromatin silencing	GO_BiologicalProcess-GOA_09.02.2016_16h18	0.0059	0.02	[5, 6, 7, 8, 9, 10, 11, 12, 13, 14]	50	3	[POU5F1, UHRF1, UHRF2]
GO:1901214	regulation of neuron death	GO_BiologicalProcess-GOA_09.02.2016_16h18	0.0056	0.02	[4, 5]	11.2676	32	[ABL1, ADNP, AKT1, AKT1S1, BAG1, BCL2L1, BRAF, CHMP4B, CRLF1, DDIT4, GDNF, HIF1A, HYOU1, IKBKB, JAK2, LRRK2, MCL1, MSH2, NQO1, NRP1, NSMF, PAWR, PPT1, PRKCI, PSEN1, RACK1, SLC6A4, SOD2, SORL1, STAT3, TSC1, XRCC2]
GO:0002208	somatic diversification of immunoglobulins involved in immune response	GO_BiologicalProcess-GOA_09.02.2016_16h18	0.0059	0.021	[4, 5, 7, 8]	20	8	[CD40, MLH1, MSH2, PAXIP1, RNF8, SUPT6H, THOC1, UNG]
GO:0045190	isotype switching	GO_BiologicalProcess-GOA_09.02.2016_16h18	0.0059	0.021	[3, 4, 5, 6, 7, 8, 9, 10, 11, 12]	20	8	[CD40, MLH1, MSH2, PAXIP1, RNF8, SUPT6H, THOC1, UNG]
GO:0002204	somatic recombination of immunoglobulin genes involved in immune response	GO_BiologicalProcess-GOA_09.02.2016_16h18	0.0059	0.021	[5, 6, 8, 9, 10, 11]	20	8	[CD40, MLH1, MSH2, PAXIP1, RNF8, SUPT6H, THOC1, UNG]
GO:0016052	carbohydrate catabolic process	GO_BiologicalProcess-GOA_09.02.2016_16h18	0.0059	0.021	[4]	12.7273	21	[BPGM, CPS1, CYP21A2, DDIT4, DERA, DHTKD1, ECD, ENO1, FUT6, G6PC, GALE, HIF1A, KHK, MIA3, OGDH, PFKFB1, PFKL, PHKA2, RBKS, RPE, STAT3]
GO:2000045	regulation of G1/S transition of mitotic cell cycle	GO_BiologicalProcess-GOA_09.02.2016_16h18	0.0061	0.021	[6, 7, 8]	12.9032	20	[AKT1, CCND1, CDKN1A, CREBBP, DDX3X, E2F1, ECD, GIGYF2, PLCB1, PSMA3, PSMA5, PSMA7, PSMB4, PSMC5, PSME3, RDX, SENP2, TCF3, UBC, ZNF655]
GO:0007417	central nervous system development	GO_BiologicalProcess-GOA_09.02.2016_16h18	0.006	0.021	[4, 5, 6]	9.0998	93	[ABAT, ABL1, ACSL3, ACTB, AKT1, APP, ARHGAP35, ARHGEF28, ARL4D, ATAT1, ATN1, AXIN1, BMP4, BPTF, BRCA1, BUD31, CEP290, CHD8, DAB2IP, DDIT4, DKK1, DLC1, DOCK7, DPYSL2, DSCAML1, DUSP10, E2F1, EIF2B2, EIF2B3, EIF2B4, EPRS, ERCC2, FAT4, FOXA2, GDF11, GDPD5, GIGYF2, HHEX, HIF1A, HNRNPK, ID1, ID3, KCNJ10, KDM7A, KIF3A, LAMC1, LDB1, LRRK2, LYN, MAPKAP1, MBD4, MED1, MPST, MYCBP2, MYH10, NCOA1, NDEL1, NDRG…
GO:0022900	electron transport chain	GO_BiologicalProcess-GOA_09.02.2016_16h18	0.0059	0.021	[3, 4]	13.1944	19	[ACAD9, ATP5G2, ATP5I, COA6, COQ7, COX5A, COX7A2L, COX7C, CYC1, NDUFA10, NDUFA4, NDUFA8, NDUFAB1, NDUFAF3, NDUFB5, NUBPL, PMPCB, SOD2, UQCRC1]
GO:0019318	hexose metabolic process	GO_BiologicalProcess-GOA_09.02.2016_16h18	0.0061	0.021	[5, 6]	11.1111	33	[ACADM, AKT1, B3GLCT, BPGM, CRTC2, ENO1, FOXA2, FUT6, G6PC, GALE, GNMT, GOT1, GPLD1, HECTD4, KHK, MAN2A2, MAN2B1, MDH1, OAS1, PCNX4, PDHB, PDK1, PFKFB1, PFKL, PGM2L1, PHKA2, POFUT1, SLC25A1, SLC25A11, SLC35B4, SLC37A4, UBC, UGP2]
GO:0051336	regulation of hydrolase activity	GO_BiologicalProcess-GOA_09.02.2016_16h18	0.0059	0.021	[4, 5]	8.81255	118	[ABL1, AHSG, AKR1B10, AKT1, APOA2, APOC1, APOC3, APP, ARAP1, ARHGAP11A, ARHGAP35, ARHGEF11, ARHGEF28, ARRB1, ATPIF1, AURKAIP1, AXIN1, BNIP2, C3, CCL16, CD40, CDC42EP1, CEP192, CLPX, CRY2, DAB2IP, DAP, DDX3X, DEPDC1, DLC1, DNAJA3, DNAJB1, DNAJB11, DOCK7, ECT2, EIF2AK3, EIF2B2, EIF2B3, EIF2B4, EPHA1, ERRFI1, FAM13B, FGD4, GBF1, GIT1, GPC3, GPLD1, HMHA1, HPN, IKBKB, IQGAP2, ITGA6, ITIH5, JAK2, KLF4,…
GO:0045595	regulation of cell differentiation	GO_BiologicalProcess-GOA_09.02.2016_16h18	0.0059	0.021	[3, 4, 5]	8.6412	138	[ABCA1, ABL1, ACIN1, ADNP, AKT1, APP, ARF1, ARHGAP35, ASXL1, ASXL2, ATAT1, AXIN1, BLOC1S6, BMP4, BNIP2, BRAF, BUD31, CCND1, CDH5, CDK1, CNOT3, CTHRC1, CUL7, CYLD, DAB2IP, DBN1, DDX5, DKK1, DMTN, DOCK7, DPYSL2, DUSP10, E2F1, ECT2, EDN1, EFNA1, EIF4E, EIF4G1, EMP2, ERRFI1, FAM21C, FAT4, FKBPL, FOXA2, FOXO4, GDF11, GDF15, GDNF, GDPD5, GFI1, HIF1A, HNRNPK, HPN, ID1, ID3, IKBKB, ITGAV, JAK2, KIAA1715,…
GO:0033143	regulation of intracellular steroid hormone receptor signaling pathway	GO_BiologicalProcess-GOA_09.02.2016_16h18	0.0059	0.021	[4, 5, 6, 7]	16.6667	11	[BRCA1, BUD31, CRY2, DDRGK1, DDX5, EP300, KMT2D, MBD4, MED1, RNF6, UFL1]
GO:0010921	regulation of phosphatase activity	GO_BiologicalProcess-GOA_09.02.2016_16h18	0.006	0.021	[5, 6, 7, 8, 9]	13.4328	18	[CEP192, CRY2, GPLD1, HPN, IKBKB, JAK2, MPP2, MYO1D, NPNT, PAWR, PPP1R15A, PPP1R2, PPP2R1A, PPP2R2C, PPP6R3, SLC6A4, TSC1, ZCCHC9]
GO:0030490	maturation of SSU-rRNA	GO_BiologicalProcess-GOA_09.02.2016_16h18	0.0059	0.021	[5, 6, 8, 9, 10]	21.875	7	[HEATR1, RPS16, RPS21, RPS8, TSR3, UTP4, WDR3]
GO:0042446	hormone biosynthetic process	GO_BiologicalProcess-GOA_09.02.2016_16h18	0.0065	0.022	[3, 5]	15.7895	12	[ATP1A1, CYP19A1, CYP21A2, DIDO1, HIF1A, HSD17B11, HSD17B8, MBD4, MED1, MIA3, SCARB1, VDAC2]
GO:0009132	nucleoside diphosphate metabolic process	GO_BiologicalProcess-GOA_09.02.2016_16h18	0.0065	0.022	[5, 6, 7]	13.3333	18	[AK1, BPGM, CASK, CMPK1, DDIT4, DHTKD1, DLG1, ECD, ENO1, HIF1A, MIA3, MPP1, MPP2, OGDH, PFKFB1, PFKL, RRM2, STAT3]
GO:0018394	peptidyl-lysine acetylation	GO_BiologicalProcess-GOA_09.02.2016_16h18	0.0065	0.022	[8, 9]	12.4294	22	[ARRB1, ATAT1, BRCA1, CREBBP, CRTC2, EIF4E, EP300, GDNF, HCFC1, IWS1, JADE2, KAT6A, LDB1, MSL3, NCOA1, PAXIP1, PIWIL2, RUVBL2, SF3B3, TCF3, TMEM98, VDAC2]
GO:0051352	negative regulation of ligase activity	GO_BiologicalProcess-GOA_09.02.2016_16h18	0.0066	0.022	[4, 5, 6]	14.2857	15	[ABL1, ANAPC10, DUSP1, PSEN1, PSMA3, PSMA5, PSMA7, PSMB4, PSMC5, PSME3, PSMG2, TFIP11, TTK, UBC, UBE2C]
GO:0060334	regulation of interferon-gamma-mediated signaling pathway	GO_BiologicalProcess-GOA_09.02.2016_16h18	0.0066	0.022	[5, 6, 7, 8]	24	6	[DNAJA3, IFNGR2, JAK2, MBD4, MED1, PPARG]
GO:0051050	positive regulation of transport	GO_BiologicalProcess-GOA_09.02.2016_16h18	0.0064	0.022	[2, 3, 4, 5]	9.11854	90	[ABAT, ABCA1, ABL1, ACSL3, AHSG, AKT1, ANK2, AP1G1, ARF1, ARIH2, ARRB1, ATPIF1, AZIN1, B2M, BMP4, BRCA1, C3, C8orf4, CACNA1D, CASK, CBL, CDK1, CEP290, CTSK, CYP4F2, DDX58, DLG1, DPYSL2, E2F1, ECT2, EDN1, EZR, GDNF, GNAI2, GOLPH3, GPC3, GPD1L, GPLD1, GSTO1, HIF1A, HNRNPK, HUWE1, IKBKB, ITGAV, JAK2, KIF3A, KNG1, KPNA1, LAMP1, MBD4, MED1, MERTK, MIEF1, MIF, MYLK, MYO18A, NEDD4L, NFE2L2, NOL3, NUCB2,…
GO:1903829	positive regulation of cellular protein localization	GO_BiologicalProcess-GOA_09.02.2016_16h18	0.0063	0.022	[2, 3, 4, 5, 6]	10.6557	39	[ACSL3, AKT1, ARIH2, BMP4, BRCA1, C8orf4, CCT2, CDK1, CEP290, CTSK, DDX58, DKC1, DLG1, E2F1, ECT2, EIF2AK3, EZR, GPD1L, HNRNPK, HUWE1, JAK2, KPNA1, LRP4, MBD4, MED1, MIEF1, PLAGL2, POU5F1, PPP3CA, PRKCI, RAB29, RACK1, RDX, SORL1, UBE2J2, UBE2L3, VIL1, YWHAH, ZBTB17]
GO:0034440	lipid oxidation	GO_BiologicalProcess-GOA_09.02.2016_16h18	0.0066	0.022	[4, 5, 6]	14.2857	15	[ACAD9, ACADM, ACADS, AKT1, CYGB, DECR1, ECH1, HACL1, HADH, HADHB, IVD, NUCB2, PHYH, PPARG, VDAC2]
GO:0010817	regulation of hormone levels	GO_BiologicalProcess-GOA_09.02.2016_16h18	0.0063	0.022	[3]	9.94475	54	[ABAT, ADH4, AKR1C1, AKR1C2, AKR1D1, ARRB1, ATP1A1, CACNA1D, CRY2, CYP19A1, CYP21A2, DIDO1, EDN1, EIF2AK3, FOXA2, GNAI2, GPLD1, HADH, HIF1A, HMGCR, HPN, HSD17B11, HSD17B8, IL1RN, JAK2, LYN, MBD4, MED1, MIA3, NUCB2, PCSK6, PFKL, PIM3, PPP3CA, RETSAT, RPL10, SAFB, SCARB1, SLC16A1, SLC2A1, SLC2A2, SLC6A4, SPCS3, SSTR5, STXBP4, SYT7, SYTL4, TFR2, TTR, UBE2Q1, UGT2B7, UQCC2, VAMP8, VDAC2]
GO:0006998	nuclear envelope organization	GO_BiologicalProcess-GOA_09.02.2016_16h18	0.0065	0.022	[4, 5]	15.7895	12	[CDK1, CTDNEP1, NDEL1, NEK6, NUP107, NUP155, NUP210, NUP37, NUP58, PPP2R1A, SPAG4, SUN2]
GO:0007167	enzyme linked receptor protein signaling pathway	GO_BiologicalProcess-GOA_09.02.2016_16h18	0.0063	0.022	[5, 6]	8.80361	117	[ABL1, ACTB, AHSG, AKT1, AKT1S1, APH1A, APP, ARHGEF11, ARHGEF28, ARPC3, ATP6V0E1, AXIN1, BMP4, BRAF, CAB39, CBL, CDH5, CDKN1A, CEP57, CLSTN1, CRKL, CSNK2B, DAB2IP, DDIT4, DKK1, ECT2, EFNA1, EGR1, EIF2AK3, EIF4B, EIF4E, EIF4G1, EPHA1, ERRFI1, FGD4, FOXO4, GDF11, GDF15, GDNF, GIGYF2, GIT1, GPC3, GPLD1, GPRC5A, HHEX, HIF1A, ID1, IGF2R, IGFBP1, IGFBP6, IKBKB, ITGAV, ITGB3BP, JADE2, JAK2, LRP4, LTBP3,…
GO:0036293	response to decreased oxygen levels	GO_BiologicalProcess-GOA_09.02.2016_16h18	0.0064	0.022	[4]	10.8434	36	[ABAT, ADSL, AKT1, ALKBH5, BACH1, BNIP3, BRIP1, CA9, CCNA2, CHCHD2, CREBBP, CYGB, DDIT4, E2F1, EDN1, EGR1, EP300, ERCC2, ERO1A, FUNDC1, HIF1A, HYOU1, MIA3, MYCBP2, NOL3, P4HB, PDK1, PPP1R15A, SLC11A2, SLC29A1, SLC6A4, SOD2, TFRC, TSC1, UBC, UBE2D2]
GO:2001057	reactive nitrogen species metabolic process	GO_BiologicalProcess-GOA_09.02.2016_16h18	0.0064	0.022	[3]	14.7368	14	[AKT1, CPS1, CYGB, CYP21A2, DDAH1, EDN1, JAK2, KLF4, LYPLA1, NQO1, SLC7A2, SOD2, VDAC2, WASL]
GO:0033145	positive regulation of intracellular steroid hormone receptor signaling pathway	GO_BiologicalProcess-GOA_09.02.2016_16h18	0.0067	0.023	[4, 5, 6, 7, 8]	27.7778	5	[BUD31, DDX5, KMT2D, MBD4, MED1]
GO:0000050	urea cycle	GO_BiologicalProcess-GOA_09.02.2016_16h18	0.0067	0.023	[4, 5, 6]	27.7778	5	[ADSL, CPS1, CYP21A2, SLC6A4, TINAGL1]
GO:0051016	barbed-end actin filament capping	GO_BiologicalProcess-GOA_09.02.2016_16h18	0.0067	0.023	[8, 9, 10, 11, 12, 13]	27.7778	5	[ADD1, CAPZB, FAM21C, NCAPG, VIL1]
GO:0061572	actin filament bundle organization	GO_BiologicalProcess-GOA_09.02.2016_16h18	0.007	0.023	[6, 7]	13.2353	18	[ADD1, ALMS1, ARAP1, ARRB1, BRAF, BUD31, DLC1, DMTN, EPHA1, EZR, ID1, MTSS1, NEDD9, PAWR, RDX, TNFAIP1, TSC1, VIL1]
GO:1903202	negative regulation of oxidative stress-induced cell death	GO_BiologicalProcess-GOA_09.02.2016_16h18	0.0069	0.023	[4, 5, 6, 7, 8]	19.5122	8	[AKT1, HIF1A, HSPH1, LRRK2, NFE2L2, NOL3, RACK1, SOD2]
GO:2001234	negative regulation of apoptotic signaling pathway	GO_BiologicalProcess-GOA_09.02.2016_16h18	0.0068	0.023	[4, 5, 6, 7, 8]	11.6379	27	[AKT1, BCL2L1, BRCA1, DDX3X, GDNF, HIF1A, HSPH1, HYOU1, ITGA6, ITGAV, LRRK2, MCL1, MIF, NFE2L2, NOL3, NRP1, PSEN1, PSME3, RIPK1, RPS6KB1, SH3RF1, SIAH2, SLC6A4, SOD2, TMEM161A, TNFAIP3, VDAC2]
GO:0001959	regulation of cytokine-mediated signaling pathway	GO_BiologicalProcess-GOA_09.02.2016_16h18	0.0068	0.023	[4, 5, 6, 7]	13.0137	19	[AGPAT1, CYLD, DNAJA3, EDN1, GFI1, HIF1A, IFNGR2, IKBKB, IL1RN, JAK2, MBD4, MED1, NOL3, PIAS4, PPARG, RACK1, RIPK1, TNFAIP3, UBC]
GO:1990089	response to nerve growth factor	GO_BiologicalProcess-GOA_09.02.2016_16h18	0.0069	0.023	[3, 5]	19.5122	8	[AKT1, APP, BPTF, E2F1, ID1, NFKB1, RAB35, SORT1]
GO:0006458	'de novo' protein folding	GO_BiologicalProcess-GOA_09.02.2016_16h18	0.0067	0.023	[3]	17.2414	10	[ACTB, CCT2, DNAJB1, ERO1A, HSPH1, TBCD, TUBA1B, TUBA1C, TUBB, TUBB1]
GO:0044724	single-organism carbohydrate catabolic process	GO_BiologicalProcess-GOA_09.02.2016_16h18	0.0071	0.024	[4, 5]	12.7389	20	[BPGM, CPS1, CYP21A2, DDIT4, DHTKD1, ECD, ENO1, FUT6, G6PC, GALE, HIF1A, KHK, MIA3, OGDH, PFKFB1, PFKL, PHKA2, RBKS, RPE, STAT3]
GO:0015711	organic anion transport	GO_BiologicalProcess-GOA_09.02.2016_16h18	0.0071	0.024	[5, 6, 7]	10.1996	46	[ABAT, ABCA1, ACSL1, ACSL3, ACSL4, AKR1C1, AKT1, APOA2, APOC1, APOC3, ATP8B2, CA9, CYP4F2, DPYSL2, EDN1, KCNJ10, MIF, MTTP, NCOA1, NFKBIE, PDE7A, PPARG, PSEN1, REPIN1, SCARB1, SERINC3, SLC11A1, SLC16A1, SLC16A3, SLC19A2, SLC1A4, SLC22A11, SLC22A31, SLC22A7, SLC25A1, SLC25A11, SLC2A1, SLC2A2, SLC35A3, SLC35B4, SLC38A4, SLC6A4, SLC6A9, SLC7A2, STARD10, TINAGL1]
GO:0016050	vesicle organization	GO_BiologicalProcess-GOA_09.02.2016_16h18	0.0073	0.024	[4]	11.0727	32	[ABCA1, AP1G1, ARF1, BLOC1S6, CHMP4B, CNIH1, COPZ1, F5, GBF1, GNAI3, GOLPH3, MYO18A, PPP6R3, PRKCI, PTGES2, RAB1B, RAB29, RAB8A, SDC1, SEC24C, SERPINE2, SNX18, SNX3, SNX8, SORT1, TBC1D20, TFG, TRAPPC4, VAMP8, VTI1A, WASL, YKT6]
GO:0045786	negative regulation of cell cycle	GO_BiologicalProcess-GOA_09.02.2016_16h18	0.0073	0.024	[3, 4, 5]	9.90654	53	[ABL1, AK1, ANAPC10, AURKAIP1, BARD1, BCL2L1, BMP4, BRCA1, CAB39, CCNA2, CCND1, CDK1, CDKN1A, DAB2IP, DLG1, DUSP1, EIF4G2, FANCI, FOXO4, GDNF, GIGYF2, HHEX, MDC1, MIF, MSH2, NUPR1, PDCD4, PPM1G, PPP1R15A, PRDM4, PRKAB1, PSMA3, PSMA5, PSMA7, PSMB4, PSMC5, PSME3, PSMG2, SYF2, TERF2, THOC1, TNFAIP3, TSC1, TTK, UBC, UBE2C, UHMK1, UHRF2, ZBTB17, ZBTB49, ZFHX3, ZNF655, ZWINT]
GO:0009124	nucleoside monophosphate biosynthetic process	GO_BiologicalProcess-GOA_09.02.2016_16h18	0.0071	0.024	[5, 6, 7, 8]	14.5833	14	[ADSL, AK1, APRT, ATP5G2, ATP5I, CMPK1, DCK, DHODH, DUT, PAICS, PFAS, STAT3, STOML2, UCK2]
GO:0033146	regulation of intracellular estrogen receptor signaling pathway	GO_BiologicalProcess-GOA_09.02.2016_16h18	0.0071	0.024	[5, 6, 7, 8]	21.2121	7	[BRCA1, DDRGK1, DDX5, KMT2D, MBD4, MED1, UFL1]
GO:1901685	glutathione derivative metabolic process	GO_BiologicalProcess-GOA_09.02.2016_16h18	0.0071	0.024	[3, 4]	21.2121	7	[ESD, GGT1, GSTA1, GSTM4, GSTO1, GSTZ1, MGST2]
GO:1901687	glutathione derivative biosynthetic process	GO_BiologicalProcess-GOA_09.02.2016_16h18	0.0071	0.024	[4, 5]	21.2121	7	[ESD, GGT1, GSTA1, GSTM4, GSTO1, GSTZ1, MGST2]
GO:0030162	regulation of proteolysis	GO_BiologicalProcess-GOA_09.02.2016_16h18	0.0074	0.024	[5, 6]	9.40397	71	[AHSG, AKR1C1, AKT1, ANAPC10, APP, ARIH2, ARRB1, ATPIF1, AURKAIP1, AXIN1, C3, CDK1, CFI, CLPX, DAB2IP, DAP, DDRGK1, DDX3X, DLC1, DNAJA3, DNAJB2, DUSP1, EIF2AK3, GPC3, GPLD1, HPN, IFT52, ITIH5, JAK2, KLF4, KNG1, LRRK2, MGMT, NFE2L2, NGFRAP1, NOL3, PAWR, PBK, PDCD6, PLGRKT, PPARG, PPP1R15A, PRDX3, PSEN1, PSMA3, PSMA5, PSMA7, PSMB4, PSMC5, PSME3, PSMG2, RACK1, RAD23B, RIPK1, SERPINA3, SERPINC1, SERP…
GO:0034381	plasma lipoprotein particle clearance	GO_BiologicalProcess-GOA_09.02.2016_16h18	0.0071	0.024	[3, 4]	21.2121	7	[APOA2, APOC1, APOC3, APOM, GPLD1, HNRNPK, SCARB1]
GO:1901264	carbohydrate derivative transport	GO_BiologicalProcess-GOA_09.02.2016_16h18	0.0074	0.024	[4, 5]	18	9	[G6PC, GJB1, RIPK1, SCARB1, SLC29A1, SLC29A3, SLC35A3, SLC35B4, SLC37A4]
GO:0006766	vitamin metabolic process	GO_BiologicalProcess-GOA_09.02.2016_16h18	0.0071	0.024	[4]	12.1693	23	[AKR1B10, AKR1C1, APOA2, APOC3, APOM, CYP4F12, CYP4F2, GFI1, GPC3, GSTO1, MIF, MMADHC, MTHFD1, MTR, NAMPT, NFKB1, PANK1, PSAT1, SDC1, SLC19A2, SLC2A1, SLC2A3, TTR]
GO:0016192	vesicle-mediated transport	GO_BiologicalProcess-GOA_09.02.2016_16h18	0.0071	0.024	[4]	8.66353	129	[ABCA1, ABL1, ACSL3, ACTB, AHSG, AKR1B10, ANK2, AP1G1, AP1S2, APOC1, APOC3, APP, ARF1, ARFRP1, ARPC3, ARRB1, ASGR1, B2M, BCL2L1, BLOC1S6, BRAF, C3, C9orf72, CBL, CFI, CHMP4B, CLSTN1, CNIH1, COG2, COPZ1, CXCL16, DCTN6, DKK1, DLC1, DMTN, DOPEY2, DPYSL2, DYNC1H1, EMP2, EXOC8, EZR, F5, FAM160A2, FAM21C, GBF1, GNAI3, GOLGA3, GOLPH3, GPC3, HNRNPK, HSPH1, HYOU1, IGF2R, ITGAV, KIF1C, KIF3A, KNG1, LAMP1, …
GO:0098657	import into cell	GO_BiologicalProcess-GOA_09.02.2016_16h18	0.0074	0.024	[4]	18	9	[ATP1A1, B2M, GDNF, KCNJ10, PAWR, RAB3B, SLC6A4, SLC7A2, TFR2]
GO:0034067	protein localization to Golgi apparatus	GO_BiologicalProcess-GOA_09.02.2016_16h18	0.0071	0.024	[6]	21.2121	7	[AKR1B10, ARFRP1, ATG9A, GBF1, GOLPH3, PTGES2, SORL1]
GO:0034101	erythrocyte homeostasis	GO_BiologicalProcess-GOA_09.02.2016_16h18	0.0072	0.024	[3, 6]	13.7931	16	[ACIN1, ADD1, ATPIF1, BMP4, CEBPG, DMTN, ERCC2, HIF1A, JAK2, LDB1, LYN, MBD4, MED1, MIA3, SFXN1, SLC11A2]
GO:0051098	regulation of binding	GO_BiologicalProcess-GOA_09.02.2016_16h18	0.0071	0.024	[3]	11	33	[ABL1, ADD1, ADNP, ANKRD52, APP, ARRB1, B2M, BMP4, CEBPG, CSNK2B, CTHRC1, DAB2IP, DKK1, E2F1, EIF2AK3, EP300, ERCC2, HMBOX1, HNRNPK, ID1, JAK2, KLF4, LRRK2, NRP1, PPP3CA, PRMT7, PSEN1, RAN, RUVBL2, SENP2, SORL1, TFIP11, TRIB3]
GO:0071216	cellular response to biotic stimulus	GO_BiologicalProcess-GOA_09.02.2016_16h18	0.0072	0.024	[3]	12	24	[ABCA1, ABL1, AKT1, B2M, CCDC47, CD40, CXCL16, DAB2IP, EIF2AK3, GFI1, HIF1A, JAK2, LITAF, LYN, MIF, NFKB1, NFKBIB, PLSCR4, PTAFR, SCARB1, SPON2, TINAGL1, TNFAIP3, TRIM5]
GO:0016445	somatic diversification of immunoglobulins	GO_BiologicalProcess-GOA_09.02.2016_16h18	0.0076	0.025	[3, 4, 6, 7]	16.9492	10	[CD40, MLH1, MSH2, PAXIP1, POLQ, RNF8, SUPT6H, TCF3, THOC1, UNG]
GO:0048545	response to steroid hormone	GO_BiologicalProcess-GOA_09.02.2016_16h18	0.0075	0.025	[4, 5]	10.041	49	[ABCA3, ACADM, ACADS, APOA2, ATAT1, ATP1A1, BMP4, BRCA1, C3, CA9, CCNA2, CCND1, CDKN1A, CPS1, CTSV, CYP21A2, DUSP1, EDN1, EP300, ERRFI1, GOT1, HIF1A, IL1RN, JAK2, KMT2D, LOX, MBD4, MED1, MMP15, MYCBP2, NASP, NCOA1, NQO1, NR1I2, NR2C2, PAWR, PFKFB1, PPARG, PTAFR, RPS6KB1, RUVBL2, SDC1, SLC6A4, SSTR5, STAT3, THRB, TINAGL1, TRIM25, UBE2L3]
GO:2000345	regulation of hepatocyte proliferation	GO_BiologicalProcess-GOA_09.02.2016_16h18	0.0076	0.025	[5, 6, 7, 8, 9, 10, 11]	33.3333	4	[HPN, MBD4, MED1, TNFAIP3]
GO:0060284	regulation of cell development	GO_BiologicalProcess-GOA_09.02.2016_16h18	0.0075	0.025	[4, 5, 6]	9.17127	83	[ABL1, ADNP, AKT1, APP, ARF1, ARHGAP35, BMP4, BNIP2, BRAF, BUD31, CDH5, CDK1, CNOT3, CUL7, DAB2IP, DBN1, DKK1, DMTN, DOCK7, DPYSL2, DUSP10, ECT2, EDN1, EFNA1, EIF4E, EIF4G1, FAM21C, FKBPL, FOXA2, GDF11, GDNF, GDPD5, GFI1, HIF1A, HNRNPK, HPN, ID1, IKBKB, KLF4, L1CAM, LRP4, LRRK2, LSM1, LYN, MAP1B, MBD4, MED1, MOB2, NCKIPSD, NCOA1, NDEL1, NDRG4, NEDD4L, NGEF, NREP, NRP1, NSMF, NUMB, PPARG, PPP2R1A,…
GO:0051258	protein polymerization	GO_BiologicalProcess-GOA_09.02.2016_16h18	0.0076	0.025	[6, 7]	11.4286	28	[ABL1, ADD1, ARF1, ARL4D, ARPC3, CAPZB, CDC42EP1, CHMP4B, COBLL1, DLG1, DMTN, FAM21C, FKBPL, GMFB, IQGAP2, JAK2, MTSS1, NCAPG, NDEL1, RDX, STMN1, TBCD, UBE2C, VASP, VDAC2, VIL1, WASF1, WASL]
GO:0031115	negative regulation of microtubule polymerization	GO_BiologicalProcess-GOA_09.02.2016_16h18	0.0076	0.025	[6, 7, 8, 9, 10]	33.3333	4	[CAPZB, FKBPL, STMN1, TBCD]
GO:0042306	regulation of protein import into nucleus	GO_BiologicalProcess-GOA_09.02.2016_16h18	0.0076	0.025	[5, 6, 7, 8, 9, 10]	12.1053	23	[AXIN1, BMP4, BRCA1, C8orf4, CDK1, CDKN1A, CYLD, DAB2IP, DDX58, ECT2, JAK2, KPNA1, LITAF, MBD4, MBTPS1, MED1, NFKBIB, NFKBIE, NOL3, NUP58, POU5F1, PPP3CA, RPL10]
GO:0072329	monocarboxylic acid catabolic process	GO_BiologicalProcess-GOA_09.02.2016_16h18	0.0078	0.025	[6, 7, 8]	13.6752	16	[ABAT, ACAD9, ACADM, ACADS, AKR1D1, AKT1, CYP4F12, CYP4F2, DECR1, ECH1, HACL1, HADH, HADHB, IVD, PHYH, SULT2A1]
GO:0044252	negative regulation of multicellular organismal metabolic process	GO_BiologicalProcess-GOA_09.02.2016_16h18	0.0076	0.025	[3, 4, 5]	33.3333	4	[ARRDC3, CYGB, ERRFI1, PPARG]
GO:0006244	pyrimidine nucleotide catabolic process	GO_BiologicalProcess-GOA_09.02.2016_16h18	0.0076	0.025	[6, 7, 8, 9]	33.3333	4	[DUT, MBD4, NEIL2, UNG]
GO:2001244	positive regulation of intrinsic apoptotic signaling pathway	GO_BiologicalProcess-GOA_09.02.2016_16h18	0.0076	0.025	[5, 6, 7, 8, 9]	16.9492	10	[BCL2L1, DFNA5, EIF2AK3, MCL1, PIAS4, PLAGL2, RACK1, SEPT4, SERINC3, SFPQ]
GO:0043094	cellular metabolic compound salvage	GO_BiologicalProcess-GOA_09.02.2016_16h18	0.008	0.026	[4]	19.0476	8	[ADI1, APRT, DCK, EIF2B2, EIF2B4, ENOPH1, GOT1, UCK2]
GO:0048199	vesicle targeting, to, from or within Golgi	GO_BiologicalProcess-GOA_09.02.2016_16h18	0.008	0.026	[4, 6, 7]	15.3846	12	[ARF1, CNIH1, COPZ1, F5, GBF1, PPP6R3, PTGES2, RAB1B, SEC24C, TFG, TRAPPC4, WIPI1]
GO:0060330	regulation of response to interferon-gamma	GO_BiologicalProcess-GOA_09.02.2016_16h18	0.0081	0.026	[4, 5, 6, 7]	23.0769	6	[DNAJA3, IFNGR2, JAK2, MBD4, MED1, PPARG]
GO:0031344	regulation of cell projection organization	GO_BiologicalProcess-GOA_09.02.2016_16h18	0.0079	0.026	[4, 5]	9.699	58	[ABL1, ADNP, AKT1, ARAP1, ARF1, ARHGAP35, BMP4, BRAF, BUD31, CAPZB, CDC42EP1, CUL7, CYLD, DAB2IP, DBN1, DCDC2, DMTN, DPYSL2, EFNA1, EZR, FKBPL, GDNF, GFI1, HNRNPK, ID1, IKBKB, KLF4, L1CAM, LRP4, LRRK2, LYN, MAP1B, MOB2, NCKIPSD, NDEL1, NDRG4, NEDD4L, NGEF, NRP1, NSMF, PPP3CA, PRKCI, PSEN1, RAB11A, RAB29, RDX, RELN, RNF6, SERPINE2, SLC6A4, SNX3, TBC1D20, TBC1D7, TTL, USP6NL, VIL1, WASL, YWHAH]
GO:0035304	regulation of protein dephosphorylation	GO_BiologicalProcess-GOA_09.02.2016_16h18	0.0081	0.026	[6, 7, 8]	12.5786	20	[CEP192, CRY2, DLC1, GPLD1, HPN, IKBKB, JAK2, MPP2, MYO1D, NPNT, NSMF, PAWR, PPP1R15A, PPP1R2, PPP2R1A, PPP2R2C, PPP6R3, SLC6A4, TSC1, ZCCHC9]
GO:0032092	positive regulation of protein binding	GO_BiologicalProcess-GOA_09.02.2016_16h18	0.008	0.026	[5]	15.3846	12	[ABL1, ADD1, ARRB1, B2M, BMP4, CTHRC1, EIF2AK3, EP300, LRRK2, NRP1, RAN, TRIB3]
GO:0051653	spindle localization	GO_BiologicalProcess-GOA_09.02.2016_16h18	0.008	0.026	[4, 5]	19.0476	8	[DYNC1H1, NDEL1, NUMA1, NUSAP1, SLC6A4, SPDL1, SPRY1, WASL]
GO:0000380	alternative mRNA splicing, via spliceosome	GO_BiologicalProcess-GOA_09.02.2016_16h18	0.008	0.026	[8, 9, 10, 11, 12]	19.0476	8	[CDK13, DDX5, MBNL1, PTBP1, RBM25, SFPQ, SFSWAP, UHMK1]
GO:0045910	negative regulation of DNA recombination	GO_BiologicalProcess-GOA_09.02.2016_16h18	0.0086	0.027	[5, 6, 7, 8, 9]	26.3158	5	[MLH1, MSH2, POLQ, TERF2, THOC1]
GO:0000281	mitotic cytokinesis	GO_BiologicalProcess-GOA_09.02.2016_16h18	0.0084	0.027	[5, 6, 7]	20.5882	7	[ANLN, CUL7, KIF23, MYH10, NUSAP1, SNX18, STMN1]
GO:0070848	response to growth factor	GO_BiologicalProcess-GOA_09.02.2016_16h18	0.0084	0.027	[4]	9.0099	91	[ABL1, AKT1, AKT1S1, APH1A, APP, ARHGEF11, AXIN1, BMP4, BPTF, BRAF, CASK, CBL, CCNA2, CDH5, CDKN1A, CEP57, CLSTN1, CPS1, CRKL, CYP21A2, DAB2IP, DDC, DDIT4, DKK1, E2F1, ECT2, EDN1, EGR1, ERRFI1, FGD4, FOXO4, GDF15, GDNF, GPC3, HHEX, HIF1A, ID1, IKBKB, IL1R1, ITGB3BP, JAK2, KLF4, LRP4, LTBP3, MAPKAP1, MARK3, MBD4, MCM7, MED1, MIA3, NEDD4L, NFKB1, NGEF, NGFRAP1, NPNT, NREP, NRP1, PCSK6, PDCD6, POU5F…
GO:0010866	regulation of triglyceride biosynthetic process	GO_BiologicalProcess-GOA_09.02.2016_16h18	0.0086	0.027	[5, 6, 7, 8, 9]	26.3158	5	[APOC3, C3, CTDNEP1, GPLD1, SCARB1]
GO:0006577	amino-acid betaine metabolic process	GO_BiologicalProcess-GOA_09.02.2016_16h18	0.0086	0.027	[4]	26.3158	5	[ACADM, ALDH7A1, CHDH, DMGDH, VDAC2]
GO:0043623	cellular protein complex assembly	GO_BiologicalProcess-GOA_09.02.2016_16h18	0.0083	0.027	[5, 6]	9.76909	55	[ABL1, ACAD9, ADD1, ANLN, ARF1, ARL4D, ARPC3, ATAT1, ATPAF1, AXIN1, CAPZB, CCT2, CDC42EP1, CHMP4B, COA6, COBLL1, COX20, CSNK2B, DLG1, DMTN, DNAJB11, EXOC8, FAM21C, FKBPL, GDNF, GMFB, HSPA4, IQGAP2, JAK2, MBD2, MTSS1, NAPB, NCAPG, NDEL1, NDUFA10, NDUFA8, NDUFAB1, NDUFAF3, NDUFB5, NUBPL, NUP107, OXA1L, PSMG2, RDX, STMN1, TBC1D20, TBCD, TOMM20, UBE2C, UQCC2, VASP, VDAC2, VIL1, WASF1, WASL]
GO:0006470	protein dephosphorylation	GO_BiologicalProcess-GOA_09.02.2016_16h18	0.0082	0.027	[6, 7]	10.6017	37	[ACP1, CDC25A, CEP192, CRY2, CTDNEP1, DLC1, DLG1, DUSP1, DUSP10, DUSP14, GPLD1, HPN, IKBKB, JAK2, MPP2, MTMR6, MYO1D, NCEH1, NPNT, NSMF, PAWR, PLPP3, PPM1G, PPM1K, PPP1R15A, PPP1R2, PPP2R1A, PPP2R2C, PPP3CA, PPP6R3, PTP4A1, PTP4A3, SLC6A4, SSU72, TSC1, UBASH3B, ZCCHC9]
GO:0005977	glycogen metabolic process	GO_BiologicalProcess-GOA_09.02.2016_16h18	0.0083	0.027	[4, 5, 6, 7]	14.7727	13	[ACADM, AKT1, CPS1, CYP21A2, G6PC, GNMT, KHK, PHKA2, PPP1R2, PTGES3, SLC37A4, UBC, UGP2]
GO:0045807	positive regulation of endocytosis	GO_BiologicalProcess-GOA_09.02.2016_16h18	0.0083	0.027	[3, 4, 5, 6, 7]	13.2812	17	[AHSG, ARF1, ARRB1, B2M, C3, CBL, GPC3, HNRNPK, ITGAV, KIF3A, MERTK, NEDD4L, PPARG, PPT1, SLC11A1, TFR2, WASL]
GO:0046434	organophosphate catabolic process	GO_BiologicalProcess-GOA_09.02.2016_16h18	0.0083	0.027	[4, 5]	12.3529	21	[APOA2, APOC1, DDIT4, DERA, DNPH1, DUT, ECD, ENPP7, GPD1L, HIF1A, INPP1, MBD4, MIA3, NAPEPLD, NEIL2, PDE7A, PRDX6, RACK1, SCARB1, STAT3, UNG]
GO:0071219	cellular response to molecule of bacterial origin	GO_BiologicalProcess-GOA_09.02.2016_16h18	0.0085	0.027	[4, 5, 7]	12.1547	22	[ABCA1, ABL1, AKT1, B2M, CD40, CXCL16, DAB2IP, GFI1, HIF1A, JAK2, LITAF, LYN, MIF, NFKB1, NFKBIB, PLSCR4, PTAFR, SCARB1, SPON2, TINAGL1, TNFAIP3, TRIM5]
GO:1901215	negative regulation of neuron death	GO_BiologicalProcess-GOA_09.02.2016_16h18	0.0086	0.027	[4, 5, 6]	11.9792	23	[ADNP, AKT1, BAG1, BCL2L1, BRAF, CHMP4B, CRLF1, GDNF, HIF1A, HYOU1, JAK2, LRRK2, MSH2, NRP1, PPT1, PRKCI, PSEN1, RACK1, SLC6A4, SOD2, SORL1, STAT3, XRCC2]
GO:0090004	positive regulation of establishment of protein localization to plasma membrane	GO_BiologicalProcess-GOA_09.02.2016_16h18	0.0084	0.027	[3, 4, 5, 6, 7, 8, 9]	20.5882	7	[ACSL3, AKT1, DLG1, EZR, PRKCI, RACK1, VIL1]
GO:0006090	pyruvate metabolic process	GO_BiologicalProcess-GOA_09.02.2016_16h18	0.009	0.028	[7, 8]	13.1783	17	[BPGM, DDIT4, DHTKD1, ECD, ENO1, GLO1, HIF1A, MIA3, OGDH, PDHB, PDK1, PFKFB1, PFKL, SLC16A1, SLC16A3, SLC6A4, STAT3]
GO:1903050	regulation of proteolysis involved in cellular protein catabolic process	GO_BiologicalProcess-GOA_09.02.2016_16h18	0.0088	0.028	[6, 7, 8]	11.1969	29	[AKT1, ANAPC10, ARIH2, ATPIF1, AXIN1, CDK1, DAB2IP, DDRGK1, DNAJB2, DUSP1, LRRK2, NFE2L2, PBK, PSEN1, PSMA3, PSMA5, PSMA7, PSMB4, PSMC5, PSME3, PSMG2, RACK1, RAD23B, TRIB3, TTK, UBC, UBE2C, UFL1, WAC]
GO:0043488	regulation of mRNA stability	GO_BiologicalProcess-GOA_09.02.2016_16h18	0.0087	0.028	[4, 7, 8]	12.9496	18	[AKT1, CNOT6L, E2F1, EIF4G1, EXOSC7, GDNF, PABPC1, PSMA3, PSMA5, PSMA7, PSMB4, PSMC5, PSME3, RBM10, SLC11A1, UBC, YBX1, YTHDF2]
GO:0055092	sterol homeostasis	GO_BiologicalProcess-GOA_09.02.2016_16h18	0.0089	0.028	[6]	15.1899	12	[ABCA1, ABCG5, AKR1C1, APOA2, APOC3, APOM, G6PC, HPN, MTTP, SCARB1, SLC37A4, TMEM97]
GO:0042632	cholesterol homeostasis	GO_BiologicalProcess-GOA_09.02.2016_16h18	0.0089	0.028	[7]	15.1899	12	[ABCA1, ABCG5, AKR1C1, APOA2, APOC3, APOM, G6PC, HPN, MTTP, SCARB1, SLC37A4, TMEM97]
GO:0007067	mitotic nuclear division	GO_BiologicalProcess-GOA_09.02.2016_16h18	0.0087	0.028	[4, 5, 6]	10.0877	46	[ABL1, AKAP8, ANAPC10, ANLN, AURKAIP1, BMP4, CCNA2, CDC25A, CDK1, CDK13, CEP57, CHMP4B, CUL7, DUSP1, EDN1, HAUS6, ITGB3BP, KIF23, KLHL42, MAPRE2, NCAPG, NDEL1, NEDD9, NEK6, NUMA1, NUP37, NUSAP1, PBK, PBRM1, PDS5B, PIBF1, PPP2R1A, PSMG2, RAB11A, RAN, RNF8, SIRT7, SKA1, SNX18, SPC24, SPDL1, TPX2, TTK, UBE2C, WASL, ZWINT]
GO:0042594	response to starvation	GO_BiologicalProcess-GOA_09.02.2016_16h18	0.0089	0.028	[3, 5]	12.2807	21	[ACADM, ACADS, ADSL, CDKN1A, CPS1, CTSV, CYP21A2, DAP, DHODH, EIF2AK3, GNAI2, LRP11, LRRK2, MAP1LC3B, MAX, NFE2L2, NUCB2, PFKFB1, PPARG, PPP1R15A, SLC2A1]
GO:0002262	myeloid cell homeostasis	GO_BiologicalProcess-GOA_09.02.2016_16h18	0.0087	0.028	[2, 5]	12.9496	18	[ACIN1, ADD1, ATPIF1, BMP4, CEBPG, DMTN, ERCC2, HIF1A, JAK2, LDB1, LYN, MBD4, MED1, MIA3, MTHFD1, SFXN1, SLC11A2, SLC37A4]
GO:0009108	coenzyme biosynthetic process	GO_BiologicalProcess-GOA_09.02.2016_16h18	0.0094	0.029	[5]	12.8571	18	[ACLY, ACOT11, ACSL1, ACSL3, ACSL4, ACSS1, ATPIF1, COQ7, ELOVL6, MAT1A, MTHFD1, NAMPT, PANK1, PDHB, PDK1, PPT1, SLC25A1, THEM4]
GO:0000288	nuclear-transcribed mRNA catabolic process, deadenylation-dependent decay	GO_BiologicalProcess-GOA_09.02.2016_16h18	0.0093	0.029	[8, 9, 10]	15.7143	11	[CNOT3, CNOT6L, EIF4B, EIF4E, EIF4G1, EXOSC7, LSM1, LSM5, MLH1, PABPC1, TNRC6B]
GO:0009150	purine ribonucleotide metabolic process	GO_BiologicalProcess-GOA_09.02.2016_16h18	0.0093	0.029	[6, 7, 8, 9]	9.7786	53	[ABCA1, ADNP, ADSL, AK1, APOC3, APRT, ATP5G2, ATP5I, ATPIF1, BPGM, BUD31, CASK, CEP290, COA6, COQ7, COX5A, DDIT4, DHTKD1, DLG1, ECD, EDN1, ENO1, GNAI2, GNAI3, HIF1A, HMGCR, LRRK2, MIA3, MPP1, MPP2, MSH2, NDUFA10, NDUFA4, NDUFA8, NDUFAB1, NDUFB5, NUCB2, OGDH, PAICS, PANK1, PAPSS2, PDE7A, PFAS, PFKFB1, PFKL, PMPCB, RACK1, SLC25A25, STAT3, STOML2, SULT2A1, UQCC2, UQCRC1]
GO:0032869	cellular response to insulin stimulus	GO_BiologicalProcess-GOA_09.02.2016_16h18	0.0092	0.029	[6, 7, 8]	10.1896	43	[AHSG, AKT1, AKT1S1, APRT, ATP6V0E1, BRAF, CAB39, DAB2IP, EIF4B, EIF4E, EIF4G1, ERRFI1, FOXO4, GOT1, GPLD1, HIF1A, HNRNPK, IGFBP1, JAK2, MARK3, NAMPT, NUCB2, NUCKS1, PPARG, PRKAB1, PRKCI, PSMA3, PSMA5, PSMA7, PSMB4, PSMC5, PSME3, RAB8A, REPIN1, RPS6KB1, SOCS7, STXBP4, THEM4, TRIB3, TSC1, UBC, WDR83, YBX1]
GO:0015748	organophosphate ester transport	GO_BiologicalProcess-GOA_09.02.2016_16h18	0.0091	0.029	[4, 5]	14.6067	13	[ABCA1, APOA2, APOC1, APOC3, ATP8B2, G6PC, GJB1, MTTP, SCARB1, SLC25A36, SLC35A3, SLC35B4, SLC37A4]
GO:0031333	negative regulation of protein complex assembly	GO_BiologicalProcess-GOA_09.02.2016_16h18	0.0091	0.029	[4, 5, 6, 7]	13.4454	16	[ADD1, CAPZB, DDX3X, DKK1, DMTN, FAM21C, FKBPL, NCAPG, RDX, SORL1, STMN1, TBCD, TFIP11, TRAF3IP1, VDAC2, VIL1]
GO:0044042	glucan metabolic process	GO_BiologicalProcess-GOA_09.02.2016_16h18	0.0091	0.029	[5]	14.6067	13	[ACADM, AKT1, CPS1, CYP21A2, G6PC, GNMT, KHK, PHKA2, PPP1R2, PTGES3, SLC37A4, UBC, UGP2]
GO:0006073	cellular glucan metabolic process	GO_BiologicalProcess-GOA_09.02.2016_16h18	0.0091	0.029	[5, 6]	14.6067	13	[ACADM, AKT1, CPS1, CYP21A2, G6PC, GNMT, KHK, PHKA2, PPP1R2, PTGES3, SLC37A4, UBC, UGP2]
GO:0045599	negative regulation of fat cell differentiation	GO_BiologicalProcess-GOA_09.02.2016_16h18	0.0093	0.029	[4, 5, 6, 7]	18.6047	8	[ASXL1, AXIN1, E2F1, MMP11, NUCB2, SOD2, SORT1, TRIB3]
GO:0042059	negative regulation of epidermal growth factor receptor signaling pathway	GO_BiologicalProcess-GOA_09.02.2016_16h18	0.0093	0.029	[5, 6, 7, 8, 9, 10, 11]	18.6047	8	[CBL, DAB2IP, ERRFI1, GPRC5A, PSEN1, SPRY1, UBC, ZGPAT]
GO:0002562	somatic diversification of immune receptors via germline recombination within a single locus	GO_BiologicalProcess-GOA_09.02.2016_16h18	0.0096	0.03	[3, 4, 6, 7, 8, 9]	16.3934	10	[CD40, LIG1, MLH1, MSH2, PAXIP1, RNF8, SUPT6H, TCF3, THOC1, UNG]
GO:0016444	somatic cell DNA recombination	GO_BiologicalProcess-GOA_09.02.2016_16h18	0.0096	0.03	[6, 7, 8]	16.3934	10	[CD40, LIG1, MLH1, MSH2, PAXIP1, RNF8, SUPT6H, TCF3, THOC1, UNG]
GO:0031399	regulation of protein modification process	GO_BiologicalProcess-GOA_09.02.2016_16h18	0.0099	0.03	[5, 6, 7]	8.38641	158	[ABL1, ACSL1, ADNP, AKT1, AKT1S1, ANAPC10, APP, ARRB1, ARRDC3, ASXL2, AXIN1, BAG1, BMP4, BNIP2, BRAF, BRCA1, BRMS1L, BUD31, C3, C3orf33, CAB39, CAMK2N1, CCDC6, CCL16, CCNA2, CCND1, CD40, CDC25A, CDK1, CDK12, CDKN1A, CEP192, CKS2, CRKL, CRLF1, CRY2, CSNK2B, DAB2IP, DCUN1D2, DDIT4, DDRGK1, DKK1, DLC1, DLG1, DMTN, DNAJA3, DNAJB2, DOCK7, DUSP1, DUSP10, DUSP14, ECT2, EDN1, EFNA1, EGR1, EIF2AK3, EMP2, …
GO:0090166	Golgi disassembly	GO_BiologicalProcess-GOA_09.02.2016_16h18	0.0098	0.03	[5, 6]	42.8571	3	[CDK1, GBF1, PTGES2]
GO:0007033	vacuole organization	GO_BiologicalProcess-GOA_09.02.2016_16h18	0.0097	0.03	[4]	12.5828	19	[ABCA1, ARF1, ATG2B, ATG9A, CHMP4B, FAM160A2, FEZ2, GNPTAB, LRRK2, MAP1LC3B, MBTPS1, PIP4K2C, PPT1, PSEN1, RAB1B, TECPR1, TMEM165, VAMP8, WIPI1]
GO:0022008	neurogenesis	GO_BiologicalProcess-GOA_09.02.2016_16h18	0.0097	0.03	[5, 6]	8.4153	154	[ABL1, ACSL4, ACTB, ADNP, AKT1, ANK2, APH1A, APP, ARF1, ARHGAP35, ARHGEF11, ARHGEF28, ARPC3, ATAT1, AXIN1, BAG1, BLOC1S6, BMP4, BNIP2, BRAF, BUD31, CACNA1D, CAPZB, CDK1, CEP290, COPS2, COQ7, CSNK2B, CTHRC1, CUL7, DAB2IP, DBN1, DCDC2, DDIT4, DFNA5, DKK1, DLG1, DOCK7, DPYSL2, DSCAML1, DUSP10, ECT2, EFNA1, EIF2B2, EIF2B3, EIF2B4, EIF4E, EIF4G1, EPHA1, ERCC2, EZR, FAT4, FEZ2, FKBPL, FOXA2, GDF11, GDN…
GO:0042254	ribosome biogenesis	GO_BiologicalProcess-GOA_09.02.2016_16h18	0.0099	0.03	[4]	11.2	28	[ABCF1, DDX3X, DKC1, EIF6, EMG1, EXOSC7, FTSJ3, GNL2, HEATR1, NSUN4, RAN, RPL10, RPL15, RPL23A, RPL34, RPL5, RPL7, RPS10, RPS15, RPS16, RPS21, RPS5, RPS8, TNIP1, TSC1, TSR3, UTP4, WDR3]
GO:0006163	purine nucleotide metabolic process	GO_BiologicalProcess-GOA_09.02.2016_16h18	0.0095	0.03	[5, 6, 7, 8]	9.70018	55	[ABCA1, ADNP, ADSL, AK1, APOC3, APRT, ATP5G2, ATP5I, ATPIF1, BPGM, BUD31, CASK, CEP290, COA6, COQ7, COX5A, DDIT4, DHTKD1, DLG1, ECD, EDN1, ENO1, GNAI2, GNAI3, HIF1A, HMGCR, LRRK2, MIA3, MPP1, MPP2, MSH2, MTHFD1, NDUFA10, NDUFA4, NDUFA8, NDUFAB1, NDUFB5, NUCB2, OAS1, OGDH, PAICS, PANK1, PAPSS2, PDE7A, PFAS, PFKFB1, PFKL, PMPCB, RACK1, SLC25A25, STAT3, STOML2, SULT2A1, UQCC2, UQCRC1]
GO:0002154	thyroid hormone mediated signaling pathway	GO_BiologicalProcess-GOA_09.02.2016_16h18	0.0098	0.03	[5, 6, 7]	42.8571	3	[MBD4, MED1, NCOA1]
GO:0009888	tissue development	GO_BiologicalProcess-GOA_09.02.2016_16h18	0.0097	0.03	[3]	8.37669	161	[ABL1, ACADM, ACTA2, AHSG, AKR1C1, AKR1C2, AKT1, ALPK3, ANKRD52, ANXA4, ANXA7, AP1S2, ARHGAP35, ARL4D, ARRDC3, ASB2, ASXL2, AXIN1, BLOC1S6, BMP2K, BMP4, BPTF, CA9, CCND1, CDH5, CDK1, CDKN1A, CEP290, CLIC4, COPS2, COQ7, CPS1, CRLF1, CSNK2B, CTDNEP1, CTHRC1, CTSV, CUL7, CYP21A2, DAB2IP, DDX5, DKK1, DLC1, DLG1, DNPH1, DUSP1, EDN1, EFNA1, EGR1, EIF2AK3, EP300, ERCC2, ERRFI1, EZR, FAT4, FHL2, FOXA2, F…
GO:0042542	response to hydrogen peroxide	GO_BiologicalProcess-GOA_09.02.2016_16h18	0.0097	0.03	[4, 5]	12.5828	19	[ABL1, BNIP3, CDK1, DLC1, DUSP1, ECT2, HIF1A, HSPH1, KLF4, LIG1, LRRK2, NFE2L2, OSER1, PRDX3, RACK1, SDC1, SOD2, TINAGL1, TNFAIP3]
GO:0010259	multicellular organismal aging	GO_BiologicalProcess-GOA_09.02.2016_16h18	0.0098	0.03	[4]	20	7	[COQ7, CTSV, DDC, EDN1, LRRK2, MSH2, SLC6A4]
GO:0015871	choline transport	GO_BiologicalProcess-GOA_09.02.2016_16h18	0.0098	0.03	[5, 6, 8, 9]	42.8571	3	[PSEN1, SEC14L1, SLC44A2]
GO:0032104	regulation of response to extracellular stimulus	GO_BiologicalProcess-GOA_09.02.2016_16h18	0.0097	0.03	[4, 5]	13.0769	17	[BNIP3, CHMP4B, CTSK, FEZ2, HIF1A, LRRK2, MAP1LC3B, MBD4, MED1, NUCB2, PIP4K2C, QSOX1, RAB1B, TSC1, VDAC1, WAC, ZBTB17]
GO:0032107	regulation of response to nutrient levels	GO_BiologicalProcess-GOA_09.02.2016_16h18	0.0097	0.03	[5, 6]	13.0769	17	[BNIP3, CHMP4B, CTSK, FEZ2, HIF1A, LRRK2, MAP1LC3B, MBD4, MED1, NUCB2, PIP4K2C, QSOX1, RAB1B, TSC1, VDAC1, WAC, ZBTB17]
GO:0001782	B cell homeostasis	GO_BiologicalProcess-GOA_09.02.2016_16h18	0.0098	0.03	[4, 7]	20	7	[ABL1, CLSTN1, HIF1A, IKBKB, LYN, MIF, TNFAIP3]
GO:0006578	amino-acid betaine biosynthetic process	GO_BiologicalProcess-GOA_09.02.2016_16h18	0.0098	0.03	[5]	42.8571	3	[ACADM, ALDH7A1, CHDH]
GO:0034201	response to oleic acid	GO_BiologicalProcess-GOA_09.02.2016_16h18	0.0098	0.03	[5, 6]	42.8571	3	[ACSL1, CPS1, CYP21A2]
GO:0048285	organelle fission	GO_BiologicalProcess-GOA_09.02.2016_16h18	0.0095	0.03	[4]	9.55414	60	[ABL1, AKAP8, ANAPC10, ANLN, AURKAIP1, BMP4, BNIP3, CCNA2, CCNB1IP1, CDC25A, CDK1, CDK13, CEP57, CHMP4B, CKS2, CUL7, DHODH, DUSP1, EDN1, HAUS6, ITGB3BP, KIF23, KLHL42, LRRK2, MAPRE2, MIEF1, MLH1, MSH2, MTFR2, NCAPG, NDEL1, NEDD9, NEK6, NUMA1, NUP37, NUSAP1, PBK, PBRM1, PDS5B, PIBF1, PIWIL2, PLCB1, PPP2R1A, PSMG2, RAB11A, RAD51B, RAN, RNF8, SIRT7, SKA1, SNX18, SPC24, SPDL1, TPX2, TRIP13, TTK, UBE2…
GO:0043243	positive regulation of protein complex disassembly	GO_BiologicalProcess-GOA_09.02.2016_16h18	0.0098	0.03	[4, 5, 6, 7]	22.2222	6	[BNIP3, CFL2, DSTN, EIF5A, FAM21C, VIL1]
GO:0030834	regulation of actin filament depolymerization	GO_BiologicalProcess-GOA_09.02.2016_16h18	0.0096	0.03	[6, 7, 8, 9, 10]	17.3077	9	[ADD1, CAPZB, CFL2, DMTN, DSTN, FAM21C, NCAPG, RDX, VIL1]
GO:0050769	positive regulation of neurogenesis	GO_BiologicalProcess-GOA_09.02.2016_16h18	0.0095	0.03	[4, 5, 6, 7, 8, 9]	10.219	42	[ADNP, ARF1, ARHGAP35, BMP4, BNIP2, BRAF, BUD31, CUL7, DAB2IP, ECT2, EIF4G1, FOXA2, GDNF, GDPD5, HIF1A, HNRNPK, IKBKB, L1CAM, LYN, MAP1B, MOB2, NCKIPSD, NCOA1, NDEL1, NDRG4, NEDD4L, NRP1, NSMF, NUMB, PPARG, PRKCI, PSEN1, RAB11A, RBM15, RELN, SERPINE2, SNX3, SRRT, TCF3, UFL1, XRCC2, ZNF335]
GO:0032057	negative regulation of translational initiation in response to stress	GO_BiologicalProcess-GOA_09.02.2016_16h18	0.0098	0.03	[5, 6, 7, 8, 9, 10, 11]	42.8571	3	[EIF2AK3, EIF2B3, EIF2B4]
GO:1900180	regulation of protein localization to nucleus	GO_BiologicalProcess-GOA_09.02.2016_16h18	0.0096	0.03	[5, 6, 7]	11.4537	26	[AKT1, AXIN1, BMP4, BRCA1, C8orf4, CCT2, CDK1, CDKN1A, CYLD, DAB2IP, DDX58, ECT2, EIF2AK3, JAK2, KPNA1, LITAF, MBD4, MBTPS1, MED1, NFKBIB, NFKBIE, NOL3, NUP58, POU5F1, PPP3CA, RPL10]
GO:1904589	regulation of protein import	GO_BiologicalProcess-GOA_09.02.2016_16h18	0.0097	0.03	[5, 6, 7]	11.8557	23	[AXIN1, BMP4, BRCA1, C8orf4, CDK1, CDKN1A, CYLD, DAB2IP, DDX58, ECT2, JAK2, KPNA1, LITAF, MBD4, MBTPS1, MED1, NFKBIB, NFKBIE, NOL3, NUP58, POU5F1, PPP3CA, RPL10]
GO:0043489	RNA stabilization	GO_BiologicalProcess-GOA_09.02.2016_16h18	0.0098	0.03	[4, 7, 8]	20	7	[DKC1, E2F1, GDNF, PABPC1, RBM10, SLC11A1, YBX1]
GO:0040001	establishment of mitotic spindle localization	GO_BiologicalProcess-GOA_09.02.2016_16h18	0.0098	0.03	[5, 6, 7]	22.2222	6	[NDEL1, NUMA1, NUSAP1, SLC6A4, SPDL1, SPRY1]
GO:0051881	regulation of mitochondrial membrane potential	GO_BiologicalProcess-GOA_09.02.2016_16h18	0.0096	0.03	[4]	16.3934	10	[ABL1, ATPIF1, BCL2L1, LRRK2, PRDX3, RACK1, SLC25A36, SLC6A4, SOD2, STOML2]
GO:0050892	intestinal absorption	GO_BiologicalProcess-GOA_09.02.2016_16h18	0.0098	0.03	[3, 4, 5]	20	7	[ABCG5, AKR1C1, APOA2, EZR, MOGAT2, SCARB1, VIL1]
GO:0043122	regulation of I-kappaB kinase/NF-kappaB signaling	GO_BiologicalProcess-GOA_09.02.2016_16h18	0.01	0.031	[5, 6, 7]	11.2971	27	[ABL1, C8orf4, CASP10, CC2D1A, CD40, CYLD, DAB2IP, DDRGK1, DNAJA3, ECT2, IKBKB, LITAF, MIB2, NEK6, NFKBIB, NFKBID, NOL3, RIPK1, RPL10, SLC44A2, TFG, TMED4, TNFAIP3, TNIP1, TRIM25, TRIM5, UBC]
GO:0051493	regulation of cytoskeleton organization	GO_BiologicalProcess-GOA_09.02.2016_16h18	0.01	0.032	[5, 6]	10.0223	45	[ABL1, ADD1, AFAP1, ALMS1, ARAP1, ARF1, ARPC3, ATAT1, BRAF, BRCA1, BUD31, CAPZB, CDC42EP1, CFL2, CHMP4B, CLIC4, CTSV, CYLD, DLC1, DLG1, DMTN, DSTN, ECT2, EDN1, EPHA1, EZR, FAM21C, FKBPL, GMFB, ID1, IQGAP2, MTSS1, MYCBP2, NCAPG, RDX, SKA1, STMN1, TBCD, TPX2, TRAF3IP1, TSC1, VASP, VIL1, WASF1, WASL]
GO:0033148	positive regulation of intracellular estrogen receptor signaling pathway	GO_BiologicalProcess-GOA_09.02.2016_16h18	0.01	0.032	[5, 6, 7, 8, 9]	30.7692	4	[DDX5, KMT2D, MBD4, MED1]
GO:0006749	glutathione metabolic process	GO_BiologicalProcess-GOA_09.02.2016_16h18	0.01	0.032	[4, 5, 6]	15.493	11	[CLIC4, EEF1G, GGT1, GLO1, GSTA1, GSTM4, GSTO1, GSTZ1, MGST2, NFE2L2, SOD2]
GO:0010801	negative regulation of peptidyl-threonine phosphorylation	GO_BiologicalProcess-GOA_09.02.2016_16h18	0.01	0.032	[7, 8, 9, 10, 11]	30.7692	4	[DDIT4, DMTN, PPP1R15A, SPRED2]
GO:0010975	regulation of neuron projection development	GO_BiologicalProcess-GOA_09.02.2016_16h18	0.01	0.032	[5, 6, 7, 8, 9, 10, 11]	10.0687	44	[ABL1, ADNP, AKT1, ARF1, ARHGAP35, BMP4, BRAF, BUD31, CUL7, DAB2IP, DBN1, DPYSL2, EFNA1, FKBPL, GDNF, GFI1, HNRNPK, ID1, IKBKB, KLF4, L1CAM, LRP4, LRRK2, LYN, MAP1B, MOB2, NCKIPSD, NDEL1, NDRG4, NEDD4L, NGEF, NRP1, NSMF, PPP3CA, PRKCI, PSEN1, RAB11A, RAB29, RELN, RNF6, SERPINE2, SNX3, TTL, YWHAH]
GO:0032352	positive regulation of hormone metabolic process	GO_BiologicalProcess-GOA_09.02.2016_16h18	0.01	0.032	[3, 4, 5, 6]	30.7692	4	[HIF1A, HPN, MIA3, VDAC2]
GO:0045116	protein neddylation	GO_BiologicalProcess-GOA_09.02.2016_16h18	0.01	0.032	[8, 9]	30.7692	4	[DCUN1D2, RNF7, UBA3, UBE2F]
GO:1901185	negative regulation of ERBB signaling pathway	GO_BiologicalProcess-GOA_09.02.2016_16h18	0.01	0.032	[4, 5, 6, 7, 8, 9, 10]	18.1818	8	[CBL, DAB2IP, ERRFI1, GPRC5A, PSEN1, SPRY1, UBC, ZGPAT]
GO:0009112	nucleobase metabolic process	GO_BiologicalProcess-GOA_09.02.2016_16h18	0.01	0.033	[4, 5, 6]	14.8148	12	[ADSL, APRT, CMPK1, CPS1, CYP21A2, DCK, DHODH, DUT, PAICS, PFAS, RRM1, UCK2]
GO:0006220	pyrimidine nucleotide metabolic process	GO_BiologicalProcess-GOA_09.02.2016_16h18	0.01	0.033	[5, 6, 7, 8]	16.9811	9	[CMPK1, DCK, DHODH, DUT, ERH, MBD4, NEIL2, UCK2, UNG]
GO:0010042	response to manganese ion	GO_BiologicalProcess-GOA_09.02.2016_16h18	0.01	0.033	[4, 5]	25	5	[EIF2AK3, LRRK2, SOD2, TFRC, TINAGL1]
GO:0046890	regulation of lipid biosynthetic process	GO_BiologicalProcess-GOA_09.02.2016_16h18	0.01	0.033	[4, 5, 6]	12.6761	18	[ACSL3, AKT1, APOC1, APOC3, ATP1A1, BRCA1, C3, CTDNEP1, ERLIN1, GFI1, GPLD1, LPCAT1, NFKB1, PIBF1, RACK1, SCARB1, TRIB3, VDAC2]
GO:0043691	reverse cholesterol transport	GO_BiologicalProcess-GOA_09.02.2016_16h18	0.01	0.033	[7, 8]	25	5	[ABCA1, APOA2, APOC3, APOM, SCARB1]
GO:0046364	monosaccharide biosynthetic process	GO_BiologicalProcess-GOA_09.02.2016_16h18	0.01	0.033	[5, 6]	13.5135	15	[ACADM, BPGM, CRTC2, ENO1, G6PC, GNMT, GOT1, GSTO1, MDH1, PCNX4, PFKFB1, PGD, SLC25A1, SLC25A11, SLC35B4]
GO:0019627	urea metabolic process	GO_BiologicalProcess-GOA_09.02.2016_16h18	0.01	0.033	[3, 4, 5]	25	5	[ADSL, CPS1, CYP21A2, SLC6A4, TINAGL1]
GO:0009264	deoxyribonucleotide catabolic process	GO_BiologicalProcess-GOA_09.02.2016_16h18	0.01	0.033	[5, 6, 7, 8, 9]	25	5	[DERA, DUT, MBD4, NEIL2, UNG]
GO:0071363	cellular response to growth factor stimulus	GO_BiologicalProcess-GOA_09.02.2016_16h18	0.01	0.033	[5]	8.9613	88	[ABL1, AKT1, AKT1S1, APH1A, APP, ARHGEF11, AXIN1, BMP4, BPTF, BRAF, CASK, CBL, CCNA2, CDH5, CDKN1A, CEP57, CLSTN1, CPS1, CRKL, CYP21A2, DAB2IP, DDC, DDIT4, DKK1, E2F1, ECT2, EDN1, EGR1, ERRFI1, FGD4, FOXO4, GDF15, GDNF, GPC3, HHEX, HIF1A, ID1, IKBKB, ITGB3BP, JAK2, KLF4, LRP4, LTBP3, MAPKAP1, MARK3, MBD4, MCM7, MED1, MIA3, NEDD4L, NFKB1, NGEF, NGFRAP1, NPNT, NREP, NRP1, PCSK6, PDCD6, POU5F1, PPP1…
GO:0034219	carbohydrate transmembrane transport	GO_BiologicalProcess-GOA_09.02.2016_16h18	0.01	0.033	[4, 5, 6]	25	5	[SLC2A1, SLC2A10, SLC2A2, SLC2A3, SLC2A9]
GO:0071495	cellular response to endogenous stimulus	GO_BiologicalProcess-GOA_09.02.2016_16h18	0.011	0.034	[3]	8.61943	118	[ABL1, ACSL1, AHSG, AKR1C1, AKR1C2, AKT1, AKT1S1, APP, APRT, ATP1A1, ATP6V0E1, AXIN1, BCL2L1, BMP4, BPTF, BRAF, BRCA1, CAB39, CBL, CCNA2, CDH5, CDKN1A, CEP57, CLSTN1, COL4A6, CPS1, CSNK2B, CTSL, CYP21A2, DAB2IP, DDC, DKK1, DMTN, DUSP1, E2F1, EDN1, EGR1, EIF4B, EIF4E, EIF4G1, ERRFI1, EZR, FOXO4, GDF15, GOT1, GPC3, GPLD1, HIF1A, HNRNPK, ID1, IGFBP1, JAK2, KLF4, LRP4, LRRK2, LTBP3, LYN, MAPKAP1, MAR…
GO:0051604	protein maturation	GO_BiologicalProcess-GOA_09.02.2016_16h18	0.011	0.035	[4, 5]	10.2362	39	[AKR1C1, APH1A, AURKAIP1, C3, CFI, CTSV, DAP, DLC1, DNAJA3, EIF2AK3, ERO1A, GGT1, HPN, IFT52, JAK2, LRRK2, NGFRAP1, NOL3, PAWR, PCSK6, PDCD6, PLGRKT, PMPCB, PPARG, PPP1R15A, PSEN1, PSMA7, RACK1, RHBDF2, RIPK1, SERPINE2, SLC11A2, SORL1, SPCS3, STOML2, TFR2, TSPAN14, UBC, UQCRC1]
GO:1901989	positive regulation of cell cycle phase transition	GO_BiologicalProcess-GOA_09.02.2016_16h18	0.012	0.036	[5, 6, 7]	15.873	10	[APP, CCND1, CREBBP, DDX3X, PLCB1, RAB11A, RAD51B, RDX, STXBP4, UBE2C]
GO:0006303	double-strand break repair via nonhomologous end joining	GO_BiologicalProcess-GOA_09.02.2016_16h18	0.012	0.036	[5, 7, 8, 9]	15.873	10	[BARD1, BRCA1, LIG1, MDC1, MLH1, PAXIP1, PIAS4, POLQ, RNF8, TFIP11]
GO:0035303	regulation of dephosphorylation	GO_BiologicalProcess-GOA_09.02.2016_16h18	0.012	0.036	[6, 7]	12.1212	20	[CEP192, CRY2, DLC1, GPLD1, HPN, IKBKB, JAK2, MPP2, MYO1D, NPNT, NSMF, PAWR, PPP1R15A, PPP1R2, PPP2R1A, PPP2R2C, PPP6R3, SLC6A4, TSC1, ZCCHC9]
GO:0006984	ER-nucleus signaling pathway	GO_BiologicalProcess-GOA_09.02.2016_16h18	0.012	0.036	[4, 5]	17.7778	8	[CCDC47, EIF2AK3, ERLIN1, IGFBP1, MBTPS1, MBTPS2, NFE2L2, PPP1R15A]
GO:0007077	mitotic nuclear envelope disassembly	GO_BiologicalProcess-GOA_09.02.2016_16h18	0.012	0.036	[5, 6, 7]	17.7778	8	[CDK1, CTDNEP1, NEK6, NUP107, NUP155, NUP210, NUP37, NUP58]
GO:0051099	positive regulation of binding	GO_BiologicalProcess-GOA_09.02.2016_16h18	0.012	0.036	[4]	12.782	17	[ABL1, ADD1, ARRB1, B2M, BMP4, CEBPG, CTHRC1, EIF2AK3, EP300, ERCC2, HMBOX1, JAK2, KLF4, LRRK2, NRP1, RAN, TRIB3]
GO:0051148	negative regulation of muscle cell differentiation	GO_BiologicalProcess-GOA_09.02.2016_16h18	0.012	0.036	[4, 5, 6, 7]	15.873	10	[BMP4, DKK1, FOXO4, ID3, PLPP7, PTBP1, RPL10, SOX9, YBX1, ZFHX3]
GO:0071347	cellular response to interleukin-1	GO_BiologicalProcess-GOA_09.02.2016_16h18	0.012	0.036	[6]	14.1304	13	[CCL16, DAB2IP, EDN1, EGR1, HIF1A, IKBKB, IL1R1, IL1RN, NFKB1, PAWR, PLCB1, SOX9, YY1]
GO:0001666	response to hypoxia	GO_BiologicalProcess-GOA_09.02.2016_16h18	0.012	0.036	[3, 5]	10.5263	34	[ABAT, ADSL, AKT1, ALKBH5, BACH1, BNIP3, BRIP1, CA9, CCNA2, CHCHD2, CREBBP, CYGB, DDIT4, E2F1, EDN1, EGR1, EP300, ERCC2, ERO1A, FUNDC1, HIF1A, HYOU1, MIA3, MYCBP2, NOL3, P4HB, PDK1, SLC11A2, SLC29A1, SLC6A4, SOD2, TFRC, UBC, UBE2D2]
GO:0045017	glycerolipid biosynthetic process	GO_BiologicalProcess-GOA_09.02.2016_16h18	0.012	0.037	[4, 5, 6]	10.7266	31	[ACLY, ACOT11, ACSL1, ACSL3, ACSL4, AGPAT1, APOA2, APOC3, ARF1, C3, CLSTN1, CRLS1, CTDNEP1, ELOVL6, FAR1, GPAA1, GPD1L, GPLD1, HADHB, LPCAT1, MOGAT2, MTMR6, PIGN, PIGO, PIK3C2B, PIP4K2C, PPT1, SCARB1, SLC25A1, SLC44A2, THEM4]
GO:0006811	ion transport	GO_BiologicalProcess-GOA_09.02.2016_16h18	0.012	0.037	[4, 5]	8.46395	135	[ABAT, ABCA1, ABL1, ACSL1, ACSL3, ACSL4, AKR1C1, AKT1, ANK2, APOA2, APOC1, APOC3, ARF1, ARMC1, ATP1A1, ATP5G2, ATP5I, ATP6V0E1, ATP8B2, B2M, BMP4, C12orf76, CA9, CAB39, CACNA1D, CACNA2D4, CASK, CHRNA2, CLIC4, COA6, COPS2, COX5A, COX7A2, COX7A2L, COX7C, CRY2, CYP4F2, DLG1, DPYSL2, EDN1, ERO1A, FKBPL, GDNF, GNAI2, GPD1L, GSTO1, HPN, IKBKB, IP6K2, ITGAV, KCNG3, KCNJ10, LASP1, LRRK2, LYN, MAGT1, MIF,…
GO:0032956	regulation of actin cytoskeleton organization	GO_BiologicalProcess-GOA_09.02.2016_16h18	0.012	0.038	[4, 5, 6, 7]	10.6312	32	[ABL1, ADD1, ALMS1, ARAP1, ARF1, ARPC3, BRAF, BUD31, CAPZB, CDC42EP1, CFL2, CTSV, DLC1, DLG1, DMTN, DSTN, EDN1, EPHA1, EZR, FAM21C, GMFB, ID1, IQGAP2, MTSS1, MYCBP2, NCAPG, RDX, TSC1, VASP, VIL1, WASF1, WASL]
GO:0045935	positive regulation of nucleobase-containing compound metabolic process	GO_BiologicalProcess-GOA_09.02.2016_16h18	0.012	0.038	[4, 5, 6]	8.35624	152	[ABCA1, ADNP, AFF1, AKT1, APP, ARHGEF11, ARID1B, ARNTL2, ARRB1, ASXL1, ASXL2, ATAD2, AXIN1, BACH1, BAG1, BAZ1B, BMP4, BPTF, BRCA1, BRIP1, BUD31, CASK, CCNA2, CCT2, CD40, CDK1, CEBPG, CEP290, CHCHD2, CHD8, COQ7, CREB3L3, CREBBP, CRTC2, DAB2IP, DAZAP1, DDRGK1, DDX3X, DDX5, DDX58, DHX33, DKC1, E2F1, EDN1, EGR1, EIF2AK3, EP300, ERCC2, ERLIN1, FHL2, FOXA2, FOXO4, FUBP3, GDNF, GTF2H3, HCFC1, HEATR1, HH…
GO:0006775	fat-soluble vitamin metabolic process	GO_BiologicalProcess-GOA_09.02.2016_16h18	0.013	0.038	[5]	14.4578	12	[AKR1B10, AKR1C1, APOA2, APOC3, APOM, CYP4F12, CYP4F2, GFI1, GPC3, NFKB1, SDC1, TTR]
GO:0016241	regulation of macroautophagy	GO_BiologicalProcess-GOA_09.02.2016_16h18	0.013	0.038	[4, 5, 6, 7]	13.5922	14	[BNIP3, CHMP4B, CTSK, FEZ2, HIF1A, LRRK2, MAP1LC3B, PIP4K2C, QSOX1, RAB1B, TSC1, VDAC1, WAC, ZBTB17]
GO:0016573	histone acetylation	GO_BiologicalProcess-GOA_09.02.2016_16h18	0.012	0.038	[4, 5, 6, 7, 8, 9, 10, 11]	12.0482	20	[ARRB1, BRCA1, CREBBP, CRTC2, EIF4E, EP300, GDNF, HCFC1, IWS1, JADE2, KAT6A, LDB1, MSL3, NCOA1, PAXIP1, PIWIL2, RUVBL2, SF3B3, TCF3, TMEM98]
GO:0051444	negative regulation of ubiquitin-protein transferase activity	GO_BiologicalProcess-GOA_09.02.2016_16h18	0.013	0.038	[5, 6, 7, 8, 9, 10, 11, 12]	13.5922	14	[ABL1, ANAPC10, DUSP1, PSEN1, PSMA3, PSMA5, PSMA7, PSMB4, PSMC5, PSME3, PSMG2, TTK, UBC, UBE2C]
GO:0060070	canonical Wnt signaling pathway	GO_BiologicalProcess-GOA_09.02.2016_16h18	0.013	0.038	[6, 7]	10.5431	33	[AXIN1, CCND1, CHD8, CSNK1G2, CTDNEP1, CTHRC1, CYLD, DAB2IP, DKK1, EGR1, IGFBP1, IGFBP6, KLF4, KREMEN1, LRP4, LRRK2, NFKB1, NKD1, PLPP3, POU5F1, PSEN1, PSMA3, PSMA5, PSMA7, PSMB4, PSMC5, PSME3, SDC1, SIAH2, SOX9, TMEM198, TRPM4, UBC]
GO:0002474	antigen processing and presentation of peptide antigen via MHC class I	GO_BiologicalProcess-GOA_09.02.2016_16h18	0.012	0.038	[4]	13.2743	15	[ABCB1, AZGP1, B2M, BLMH, HLA-A, ITGAV, PDIA3, PSMA3, PSMA5, PSMA7, PSMB4, PSMC5, PSME3, SEC24C, UBC]
GO:0070301	cellular response to hydrogen peroxide	GO_BiologicalProcess-GOA_09.02.2016_16h18	0.013	0.038	[5, 6]	13.9785	13	[ABL1, BNIP3, CDK1, ECT2, HIF1A, HSPH1, KLF4, LRRK2, NFE2L2, OSER1, RACK1, TINAGL1, TNFAIP3]
GO:0007249	I-kappaB kinase/NF-kappaB signaling	GO_BiologicalProcess-GOA_09.02.2016_16h18	0.013	0.038	[5, 6]	10.8614	29	[ABL1, AZI2, C8orf4, CASP10, CC2D1A, CD40, CYLD, DAB2IP, DDRGK1, DNAJA3, ECT2, IKBKB, LITAF, MIB2, NEK6, NFKB1, NFKBIB, NFKBID, NOL3, RIPK1, RPL10, SLC44A2, TFG, TMED4, TNFAIP3, TNIP1, TRIM25, TRIM5, UBC]
GO:0000018	regulation of DNA recombination	GO_BiologicalProcess-GOA_09.02.2016_16h18	0.013	0.039	[5, 6, 7, 8]	15.625	10	[CD40, KPNA1, MLH1, MSH2, PAXIP1, POLQ, SUPT6H, TERF2, THOC1, UNG]
GO:0043161	proteasome-mediated ubiquitin-dependent protein catabolic process	GO_BiologicalProcess-GOA_09.02.2016_16h18	0.013	0.039	[6, 7, 8, 9, 10]	10.1562	39	[AKT1, ANAPC10, ARIH2, ARRB1, AXIN1, BFAR, CCDC47, CDK1, DAB2IP, DDB1, DNAJB2, DUSP1, ERLIN1, KLHL42, LRRK2, NEDD4L, NFE2L2, PBK, PSEN1, PSMA3, PSMA5, PSMA7, PSMB4, PSMC5, PSME3, PSMG2, RACK1, RAD23B, RNF7, SIAH2, TNFAIP1, TOPORS, TRIB3, TTK, UBC, UBE2C, UBE2J2, UFL1, WAC]
GO:0014003	oligodendrocyte development	GO_BiologicalProcess-GOA_09.02.2016_16h18	0.013	0.039	[5, 6, 7, 8, 9, 10]	18.9189	7	[BUD31, EIF2B2, EIF2B3, EIF2B4, ERCC2, KCNJ10, LYN]
GO:1902116	negative regulation of organelle assembly	GO_BiologicalProcess-GOA_09.02.2016_16h18	0.013	0.039	[4, 5, 6, 7]	23.8095	5	[BRCA1, CHMP4B, FEZ2, LRRK2, TBC1D7]
GO:0001885	endothelial cell development	GO_BiologicalProcess-GOA_09.02.2016_16h18	0.013	0.039	[5, 6, 7]	15.625	10	[CDH5, CLIC4, EZR, ID1, IKBKB, PLOD3, RAB1B, RDX, TJP1, VEZF1]
GO:0060828	regulation of canonical Wnt signaling pathway	GO_BiologicalProcess-GOA_09.02.2016_16h18	0.013	0.039	[5, 6, 7, 8]	10.9375	28	[AXIN1, CHD8, CSNK1G2, CTDNEP1, CTHRC1, CYLD, DAB2IP, DKK1, EGR1, IGFBP1, IGFBP6, KREMEN1, LRP4, LRRK2, NFKB1, NKD1, POU5F1, PSMA3, PSMA5, PSMA7, PSMB4, PSMC5, PSME3, SIAH2, SOX9, TMEM198, TRPM4, UBC]
GO:0051693	actin filament capping	GO_BiologicalProcess-GOA_09.02.2016_16h18	0.013	0.039	[7, 8, 9, 10, 11, 12]	18.9189	7	[ADD1, CAPZB, DMTN, FAM21C, NCAPG, RDX, VIL1]
GO:0010543	regulation of platelet activation	GO_BiologicalProcess-GOA_09.02.2016_16h18	0.013	0.039	[4, 5, 6, 7, 8]	18.9189	7	[ABAT, DMTN, LYN, RHBDF2, SEPP1, SERPINE2, UBASH3B]
GO:1903319	positive regulation of protein maturation	GO_BiologicalProcess-GOA_09.02.2016_16h18	0.013	0.039	[5, 6, 7]	23.8095	5	[C3, HPN, PLGRKT, PSMA7, TFR2]
GO:0046386	deoxyribose phosphate catabolic process	GO_BiologicalProcess-GOA_09.02.2016_16h18	0.013	0.039	[5, 6]	23.8095	5	[DERA, DUT, MBD4, NEIL2, UNG]
GO:0009262	deoxyribonucleotide metabolic process	GO_BiologicalProcess-GOA_09.02.2016_16h18	0.013	0.039	[4, 6, 7, 8]	18.9189	7	[DERA, DUT, MBD4, NEIL2, RRM1, RRM2, UNG]
GO:1904377	positive regulation of protein localization to cell periphery	GO_BiologicalProcess-GOA_09.02.2016_16h18	0.013	0.039	[3, 4, 5, 6, 7]	18.9189	7	[ACSL3, AKT1, DLG1, EZR, PRKCI, RACK1, VIL1]
GO:1903078	positive regulation of protein localization to plasma membrane	GO_BiologicalProcess-GOA_09.02.2016_16h18	0.013	0.039	[4, 5, 6, 7, 8]	18.9189	7	[ACSL3, AKT1, DLG1, EZR, PRKCI, RACK1, VIL1]
GO:0061099	negative regulation of protein tyrosine kinase activity	GO_BiologicalProcess-GOA_09.02.2016_16h18	0.013	0.039	[7, 8, 9, 10, 11, 12]	23.8095	5	[ERRFI1, GPRC5A, PSEN1, RACK1, ZGPAT]
GO:0002200	somatic diversification of immune receptors	GO_BiologicalProcess-GOA_09.02.2016_16h18	0.013	0.04	[2, 3, 5, 6]	14.8649	11	[CD40, LIG1, MLH1, MSH2, PAXIP1, POLQ, RNF8, SUPT6H, TCF3, THOC1, UNG]
GO:1903533	regulation of protein targeting	GO_BiologicalProcess-GOA_09.02.2016_16h18	0.013	0.04	[6, 7, 8]	10.4294	34	[ARIH2, ATPIF1, AXIN1, BMP4, BRCA1, C8orf4, CDK1, CDKN1A, CTSK, CYLD, DAB2IP, DDX58, DMTN, ECT2, HUWE1, JAK2, KPNA1, LITAF, LRRK2, MBD4, MBTPS1, MED1, MIEF1, NFKBIB, NFKBIE, NOL3, NUP58, PLAGL2, POU5F1, PPP3CA, RPL10, UBE2J2, UBE2L3, ZBTB17]
GO:0007420	brain development	GO_BiologicalProcess-GOA_09.02.2016_16h18	0.013	0.04	[3, 4, 5, 6, 7]	9.13771	71	[ABAT, ABL1, ACSL3, ACTB, APP, ARHGAP35, ARL4D, ATAT1, AXIN1, BMP4, BPTF, BRCA1, BUD31, CEP290, CHD8, DAB2IP, DDIT4, DKK1, DLC1, DOCK7, DPYSL2, DSCAML1, E2F1, EPRS, FAT4, FOXA2, GDPD5, HHEX, HIF1A, HNRNPK, ID1, KDM7A, KIF3A, LDB1, LRRK2, MAPKAP1, MBD4, MED1, MYH10, NCOA1, NDEL1, NDRG4, NR2C2, NRP1, NUMB, OGDH, OTX1, PLCB1, PPT1, PSEN1, RAC3, RELN, RRM1, SATB2, SDF4, SEPP1, SEPT4, SERPINE2, SLC6A4…
GO:0006554	lysine catabolic process	GO_BiologicalProcess-GOA_09.02.2016_16h18	0.013	0.04	[7, 8, 9, 10, 11]	28.5714	4	[ALDH7A1, DLST, OGDH, PIPOX]
GO:0010984	regulation of lipoprotein particle clearance	GO_BiologicalProcess-GOA_09.02.2016_16h18	0.013	0.04	[3, 4, 5]	28.5714	4	[APOC1, APOC3, GPLD1, HNRNPK]
GO:0010867	positive regulation of triglyceride biosynthetic process	GO_BiologicalProcess-GOA_09.02.2016_16h18	0.013	0.04	[5, 6, 7, 8, 9, 10]	28.5714	4	[APOC3, CTDNEP1, GPLD1, SCARB1]
GO:0006067	ethanol metabolic process	GO_BiologicalProcess-GOA_09.02.2016_16h18	0.013	0.04	[6]	28.5714	4	[ACSS1, ADH4, ADH5, ALDH3B1]
GO:0046487	glyoxylate metabolic process	GO_BiologicalProcess-GOA_09.02.2016_16h18	0.014	0.04	[4, 7, 8]	20.6897	6	[DHTKD1, DLST, GRHPR, NDUFAB1, OGDH, PDHB]
GO:0070365	hepatocyte differentiation	GO_BiologicalProcess-GOA_09.02.2016_16h18	0.013	0.04	[5, 6, 7, 8]	28.5714	4	[BMP4, CPS1, CYP21A2, HHEX]
GO:0070316	regulation of G0 to G1 transition	GO_BiologicalProcess-GOA_09.02.2016_16h18	0.013	0.04	[5, 6]	28.5714	4	[DAB2IP, FOXO4, MBD4, MED1]
GO:0030836	positive regulation of actin filament depolymerization	GO_BiologicalProcess-GOA_09.02.2016_16h18	0.013	0.04	[6, 7, 8, 9, 10, 11]	28.5714	4	[CFL2, DSTN, FAM21C, VIL1]
GO:0032496	response to lipopolysaccharide	GO_BiologicalProcess-GOA_09.02.2016_16h18	0.013	0.04	[4, 5, 7]	10.2493	37	[ABCA1, ABL1, ADH5, AKT1, B2M, CD40, CPS1, CXCL16, CYP21A2, DAB2IP, DUSP10, EDN1, GFI1, HIF1A, IKBKB, JAK2, LITAF, LYN, MGST2, MIF, NFKB1, NFKBIB, OTUD5, PAWR, PLSCR4, PRDX3, PTAFR, RPS6KB1, SCARB1, SEPP1, SLC11A1, SOD2, SPON2, TCF3, TINAGL1, TNFAIP3, TRIM5]
GO:0045598	regulation of fat cell differentiation	GO_BiologicalProcess-GOA_09.02.2016_16h18	0.013	0.04	[4, 5, 6]	13.1579	15	[AKT1, ASXL1, ASXL2, ATAT1, AXIN1, DUSP10, E2F1, MEX3C, MMP11, NUCB2, PPARG, SOD2, SORT1, TAF8, TRIB3]
GO:2000008	regulation of protein localization to cell surface	GO_BiologicalProcess-GOA_09.02.2016_16h18	0.014	0.04	[5, 6]	20.6897	6	[ASTN2, GBF1, GPD1L, HNRNPK, NEDD4L, PTGES2]
GO:0006820	anion transport	GO_BiologicalProcess-GOA_09.02.2016_16h18	0.014	0.041	[5, 6]	9.41558	58	[ABAT, ABCA1, ACSL1, ACSL3, ACSL4, AKR1C1, AKT1, APOA2, APOC1, APOC3, ATP8B2, CA9, CLIC4, CRY2, CYP4F2, DPYSL2, EDN1, GDNF, IP6K2, KCNJ10, MIF, MTTP, NCOA1, NFKBIE, PDE7A, PPARG, PSEN1, PTAFR, RAB3B, REPIN1, RIPK1, SCARB1, SERINC3, SLC11A1, SLC16A1, SLC16A3, SLC17A1, SLC19A2, SLC1A4, SLC22A11, SLC22A31, SLC22A7, SLC25A1, SLC25A11, SLC2A1, SLC2A2, SLC35A3, SLC35B4, SLC37A4, SLC38A4, SLC6A4, SLC6A9…
GO:0016101	diterpenoid metabolic process	GO_BiologicalProcess-GOA_09.02.2016_16h18	0.014	0.041	[6, 7]	13.4615	14	[ADH4, ADH5, AKR1B10, AKR1C1, APOA2, APOC3, APOM, E2F1, GPC3, NAPEPLD, PECR, RETSAT, SDC1, TTR]
GO:0009062	fatty acid catabolic process	GO_BiologicalProcess-GOA_09.02.2016_16h18	0.014	0.041	[5, 6, 7, 8, 9]	13.8298	13	[ACAD9, ACADM, ACADS, AKT1, CYP4F12, CYP4F2, DECR1, ECH1, HACL1, HADH, HADHB, IVD, PHYH]
GO:0006694	steroid biosynthetic process	GO_BiologicalProcess-GOA_09.02.2016_16h18	0.014	0.042	[5]	11.9048	20	[ACLY, AKR1D1, ATP1A1, CYP19A1, CYP21A2, ERLIN1, FDPS, GFI1, HMGCR, HSD17B11, HSD17B8, LBR, MBD4, MED1, MSMO1, MVD, MVK, NFKB1, SCARB1, VDAC2]
GO:0006487	protein N-linked glycosylation	GO_BiologicalProcess-GOA_09.02.2016_16h18	0.014	0.042	[4, 7, 8]	10.7807	29	[ALG11, ANK2, B4GALT2, CCDC126, CNIH1, COG2, COPZ1, DCTN6, DYNC1H1, F5, GBF1, GNPTAB, MAGT1, MAN2A2, MIA3, MOGAT2, MVD, PDCD6, PDIA3, PPP6R3, PTGES2, RAB1B, SEC24C, ST3GAL4, TFG, TMEM165, TRAPPC4, USF3, YKT6]
GO:0035382	sterol transmembrane transport	GO_BiologicalProcess-GOA_09.02.2016_16h18	0.014	0.042	[4, 5, 6, 7]	37.5	3	[APOA2, APOC3, SCARB1]
GO:0035376	sterol import	GO_BiologicalProcess-GOA_09.02.2016_16h18	0.014	0.042	[5, 6, 7, 8]	37.5	3	[APOA2, APOC3, SCARB1]
GO:0070508	cholesterol import	GO_BiologicalProcess-GOA_09.02.2016_16h18	0.014	0.042	[6, 7, 8, 9]	37.5	3	[APOA2, APOC3, SCARB1]
GO:0014745	negative regulation of muscle adaptation	GO_BiologicalProcess-GOA_09.02.2016_16h18	0.014	0.042	[3, 4, 5, 6, 7]	37.5	3	[ERRFI1, KLF4, NOL3]
GO:0006721	terpenoid metabolic process	GO_BiologicalProcess-GOA_09.02.2016_16h18	0.014	0.042	[5, 6]	13.0435	15	[ADH4, ADH5, AKR1B10, AKR1C1, APOA2, APOC3, APOM, E2F1, FDPS, GPC3, NAPEPLD, PECR, RETSAT, SDC1, TTR]
GO:0015809	arginine transport	GO_BiologicalProcess-GOA_09.02.2016_16h18	0.014	0.042	[6, 7, 8, 9, 10, 11]	37.5	3	[SLC11A1, SLC7A2, TINAGL1]
GO:0030948	negative regulation of vascular endothelial growth factor receptor signaling pathway	GO_BiologicalProcess-GOA_09.02.2016_16h18	0.014	0.042	[4, 5, 6, 7, 8, 9, 10]	37.5	3	[DAB2IP, HHEX, PDCD6]
GO:2000192	negative regulation of fatty acid transport	GO_BiologicalProcess-GOA_09.02.2016_16h18	0.014	0.042	[4, 5, 6, 7, 8, 9, 10, 11, 12]	37.5	3	[ACSL4, AKT1, CYP4F2]
GO:0034144	negative regulation of toll-like receptor 4 signaling pathway	GO_BiologicalProcess-GOA_09.02.2016_16h18	0.014	0.042	[4, 5, 6, 7, 8, 9, 10, 11, 12, 13, 14]	37.5	3	[DAB2IP, LYN, TNFAIP3]
GO:0034393	positive regulation of smooth muscle cell apoptotic process	GO_BiologicalProcess-GOA_09.02.2016_16h18	0.014	0.042	[7, 8, 9, 10]	37.5	3	[ARRB1, PDCD4, RBM10]
GO:0035751	regulation of lysosomal lumen pH	GO_BiologicalProcess-GOA_09.02.2016_16h18	0.014	0.042	[7, 10, 11]	37.5	3	[LRRK2, PPT1, TMEM165]
GO:0048102	autophagic cell death	GO_BiologicalProcess-GOA_09.02.2016_16h18	0.014	0.042	[5]	37.5	3	[BNIP3, CTSV, LAMP1]
GO:0045008	depyrimidination	GO_BiologicalProcess-GOA_09.02.2016_16h18	0.014	0.042	[6, 7, 8, 9, 10, 11, 12]	37.5	3	[MBD4, NEIL2, UNG]
GO:0033750	ribosome localization	GO_BiologicalProcess-GOA_09.02.2016_16h18	0.014	0.042	[4]	37.5	3	[EIF6, RAN, RPS15]
GO:0033753	establishment of ribosome localization	GO_BiologicalProcess-GOA_09.02.2016_16h18	0.014	0.042	[4, 5]	37.5	3	[EIF6, RAN, RPS15]
GO:0000054	ribosomal subunit export from nucleus	GO_BiologicalProcess-GOA_09.02.2016_16h18	0.014	0.042	[4, 5, 6, 7, 8, 10]	37.5	3	[EIF6, RAN, RPS15]
GO:1903726	negative regulation of phospholipid metabolic process	GO_BiologicalProcess-GOA_09.02.2016_16h18	0.014	0.042	[4, 5, 6, 7, 8]	37.5	3	[APOC1, DAB2IP, LPCAT1]
GO:1903034	regulation of response to wounding	GO_BiologicalProcess-GOA_09.02.2016_16h18	0.015	0.043	[4, 5]	9.8434	44	[ABAT, AHSG, AKR1C1, BRAF, C3, CASK, CCL16, CFI, CREB3L3, CYP19A1, DMTN, DUSP10, EDN1, FAM46A, FOXA2, GGT1, HMGCR, IL1R1, JAK2, KLF4, KNG1, LYN, MVK, MYLK, NDEL1, NFE2L2, NFKB1, OSMR, PBK, PLPP3, PPARG, PSMA7, PSMB4, RHBDF2, RPL10, SEPP1, SERPINC1, SERPINE2, SLC7A2, TNFAIP3, TNIP1, UBASH3B, VAMP8, VIL1]
GO:0006101	citrate metabolic process	GO_BiologicalProcess-GOA_09.02.2016_16h18	0.015	0.044	[7, 8]	18.4211	7	[ACLY, DHTKD1, DLST, MDH1, OGDH, PDHB, SUCLG2]
GO:0001523	retinoid metabolic process	GO_BiologicalProcess-GOA_09.02.2016_16h18	0.015	0.044	[7, 8]	13.6842	13	[ADH4, ADH5, AKR1B10, AKR1C1, APOA2, APOC3, APOM, E2F1, GPC3, NAPEPLD, RETSAT, SDC1, TTR]
GO:0030042	actin filament depolymerization	GO_BiologicalProcess-GOA_09.02.2016_16h18	0.015	0.044	[7, 8]	16.0714	9	[ADD1, CAPZB, CFL2, DMTN, DSTN, FAM21C, NCAPG, RDX, VIL1]
GO:0042255	ribosome assembly	GO_BiologicalProcess-GOA_09.02.2016_16h18	0.015	0.044	[5, 6, 7]	16.0714	9	[DDX3X, EIF6, NSUN4, RPL10, RPL15, RPL23A, RPL5, RPS10, RPS5]
GO:0048259	regulation of receptor-mediated endocytosis	GO_BiologicalProcess-GOA_09.02.2016_16h18	0.015	0.044	[5, 6, 7]	14.1176	12	[APOC1, APOC3, ARF1, ARRB1, B2M, CBL, DKK1, HNRNPK, KIF3A, NEDD4L, PPT1, WASL]
GO:0071548	response to dexamethasone	GO_BiologicalProcess-GOA_09.02.2016_16h18	0.015	0.044	[5, 7, 8]	18.4211	7	[CPS1, CYP21A2, EDN1, ERRFI1, JAK2, PTAFR, TINAGL1]
GO:0051293	establishment of spindle localization	GO_BiologicalProcess-GOA_09.02.2016_16h18	0.015	0.044	[4, 5, 6]	18.4211	7	[DYNC1H1, NDEL1, NUMA1, NUSAP1, SLC6A4, SPDL1, SPRY1]
GO:0010039	response to iron ion	GO_BiologicalProcess-GOA_09.02.2016_16h18	0.015	0.044	[4, 5]	18.4211	7	[ABAT, B2M, CCND1, PAWR, SLC11A2, TFR2, TFRC]
GO:0060322	head development	GO_BiologicalProcess-GOA_09.02.2016_16h18	0.015	0.045	[3]	9.02439	74	[ABAT, ABL1, ACSL3, ACTB, ANKRD11, APP, ARHGAP35, ARL4D, ATAT1, AXIN1, BMP4, BPTF, BRAF, BRCA1, BUD31, CEP290, CHD8, DAB2IP, DDIT4, DKK1, DLC1, DOCK7, DPYSL2, DSCAML1, E2F1, EPRS, FAT4, FOXA2, GDPD5, HHEX, HIF1A, HNRNPK, ID1, KAT6A, KDM7A, KIF3A, LDB1, LRRK2, MAPKAP1, MBD4, MED1, MYH10, NCOA1, NDEL1, NDRG4, NR2C2, NRP1, NUMB, OGDH, OTX1, PLCB1, PPT1, PSEN1, RAC3, RELN, RRM1, SATB2, SDF4, SEPP1, S…
GO:0001822	kidney development	GO_BiologicalProcess-GOA_09.02.2016_16h18	0.015	0.045	[3, 4, 5, 6, 7]	10.5442	31	[ACTA2, APH1A, BMP4, CEP290, CRLF1, DLG1, EGR1, FAT4, FRAS1, GDF11, GDNF, GPC3, HNRNPK, ID3, KIF3A, LAMC1, LRP4, LRRK2, MPST, MTSS1, NPNT, NRP1, OSR1, PSPN, SDC1, SMAD9, SOX9, SPRY1, TRAF3IP1, TSC1, UPK3A]
GO:0034308	primary alcohol metabolic process	GO_BiologicalProcess-GOA_09.02.2016_16h18	0.015	0.045	[5]	17.0213	8	[ACSS1, ADH4, ADH5, AKR1B10, ALDH3B1, PECR, RETSAT, TTR]
GO:0051130	positive regulation of cellular component organization	GO_BiologicalProcess-GOA_09.02.2016_16h18	0.015	0.045	[3, 4, 5]	8.63487	105	[ACSL3, ADNP, AHSG, AKT1, ARAP1, ARF1, ARHGAP35, ARIH2, ARPC3, ARRB1, ASXL2, ATAT1, ATPIF1, B2M, BMP4, BNIP3, BRAF, BRCA1, BUD31, C3, CBL, CCT2, CDC42EP1, CFL2, CLSTN1, CLSTN3, CNOT6L, CTSK, CUL7, DAB2IP, DKC1, DLG1, DMTN, DSTN, E2F1, EDN1, EIF5A, EPHA1, EZR, FAM21C, GDF15, GDNF, GMFB, GPC3, HIF1A, HMBOX1, HNRNPK, HUWE1, ID1, IKBKB, IQGAP2, ITGAV, KIF3A, L1CAM, LRP4, LYN, MAP1B, MERTK, MIEF1, MOB…
GO:0006271	DNA strand elongation involved in DNA replication	GO_BiologicalProcess-GOA_09.02.2016_16h18	0.015	0.045	[6, 7, 8, 9]	17.0213	8	[GINS1, GINS3, LIG1, MCM2, MCM7, PRIM1, PRIM2, RFC3]
GO:0032480	negative regulation of type I interferon production	GO_BiologicalProcess-GOA_09.02.2016_16h18	0.015	0.045	[4, 5, 6]	17.0213	8	[ATG9A, CYLD, DDX58, OTUD5, TNFAIP3, TRAF3IP1, TRIM25, UBC]
GO:0051650	establishment of vesicle localization	GO_BiologicalProcess-GOA_09.02.2016_16h18	0.016	0.046	[4, 5]	10.9705	26	[AP1S2, ARF1, ARL4D, BLOC1S6, BRAF, CNIH1, COPZ1, DPYSL2, F5, GBF1, KIF3A, LRRK2, NAPB, NDEL1, PPP6R3, PSEN1, PTGES2, RAB11A, RAB1B, SEC24C, SLC6A4, TFG, TRAPPC4, WASL, WIPI1, YKT6]
GO:0044818	mitotic G2/M transition checkpoint	GO_BiologicalProcess-GOA_09.02.2016_16h18	0.016	0.046	[6, 7, 8, 9, 10]	22.7273	5	[CCNA2, CDK1, FANCI, FOXO4, SYF2]
GO:0016242	negative regulation of macroautophagy	GO_BiologicalProcess-GOA_09.02.2016_16h18	0.016	0.046	[4, 5, 6, 7, 8]	22.7273	5	[CHMP4B, FEZ2, LRRK2, QSOX1, TSC1]
GO:0071941	nitrogen cycle metabolic process	GO_BiologicalProcess-GOA_09.02.2016_16h18	0.016	0.046	[3]	22.7273	5	[ADSL, CPS1, CYP21A2, SLC6A4, TINAGL1]
GO:0090162	establishment of epithelial cell polarity	GO_BiologicalProcess-GOA_09.02.2016_16h18	0.016	0.046	[5]	22.7273	5	[EZR, FERMT1, GOLPH3, MYO18A, SIPA1L3]
GO:2000191	regulation of fatty acid transport	GO_BiologicalProcess-GOA_09.02.2016_16h18	0.016	0.046	[5, 6, 7, 8, 9, 10, 11]	20	6	[ACSL4, AKT1, CYP4F2, EDN1, MIF, REPIN1]
GO:0045948	positive regulation of translational initiation	GO_BiologicalProcess-GOA_09.02.2016_16h18	0.016	0.046	[4, 5, 6, 7, 8, 9, 10]	22.7273	5	[DDX3X, PPP1R15A, RPS6KB1, UHMK1, YTHDF2]
GO:0020027	hemoglobin metabolic process	GO_BiologicalProcess-GOA_09.02.2016_16h18	0.016	0.046	[4, 5]	22.7273	5	[ADD1, HIF1A, KLF4, LDB1, SNX3]
GO:0032007	negative regulation of TOR signaling	GO_BiologicalProcess-GOA_09.02.2016_16h18	0.016	0.046	[5, 6, 7, 8]	20	6	[AKT1S1, DDIT4, HIF1A, PDCD6, TBC1D7, TSC1]
GO:0006119	oxidative phosphorylation	GO_BiologicalProcess-GOA_09.02.2016_16h18	0.016	0.047	[4, 6, 8, 9, 10, 11]	13.5417	13	[APOC3, COA6, COQ7, COX5A, MSH2, NDUFA10, NDUFA4, NDUFA8, NDUFAB1, NDUFB5, PMPCB, UQCC2, UQCRC1]
GO:0034644	cellular response to UV	GO_BiologicalProcess-GOA_09.02.2016_16h18	0.016	0.047	[6]	14.4737	11	[CDC25A, CDKN1A, CREBBP, DDB1, EP300, PBK, POLQ, PPP1R15A, RUVBL2, TMEM161A, YY1]
GO:0033108	mitochondrial respiratory chain complex assembly	GO_BiologicalProcess-GOA_09.02.2016_16h18	0.016	0.047	[5, 6, 7]	14.4737	11	[ACAD9, COX20, DNAJB11, NDUFA10, NDUFA8, NDUFAB1, NDUFAF3, NDUFB5, NUBPL, OXA1L, UQCC2]
GO:0042147	retrograde transport, endosome to Golgi	GO_BiologicalProcess-GOA_09.02.2016_16h18	0.016	0.047	[5, 6, 7]	14.4737	11	[AKR1B10, ARFRP1, FAM21C, GBF1, PTGES2, RAB9A, RHOBTB3, SNX8, VPS53, VTI1A, YKT6]
GO:0046902	regulation of mitochondrial membrane permeability	GO_BiologicalProcess-GOA_09.02.2016_16h18	0.016	0.047	[4, 5, 6, 7]	14.4737	11	[AKT1, ATPIF1, BCL2L1, BNIP3, E2F1, GDNF, NOL3, SLC6A4, STAT3, THEM4, YWHAH]
GO:1903317	regulation of protein maturation	GO_BiologicalProcess-GOA_09.02.2016_16h18	0.016	0.047	[5, 6]	13.9535	12	[AKR1C1, C3, CFI, HPN, IFT52, LRRK2, NOL3, PLGRKT, PPP1R15A, PSMA7, SERPINE2, TFR2]
GO:1902653	secondary alcohol biosynthetic process	GO_BiologicalProcess-GOA_09.02.2016_16h18	0.017	0.048	[6]	15.7895	9	[ACLY, ERLIN1, FDPS, HMGCR, LBR, MSMO1, MVD, MVK, VDAC2]
GO:0006695	cholesterol biosynthetic process	GO_BiologicalProcess-GOA_09.02.2016_16h18	0.017	0.048	[7]	15.7895	9	[ACLY, ERLIN1, FDPS, HMGCR, LBR, MSMO1, MVD, MVK, VDAC2]
GO:1901991	negative regulation of mitotic cell cycle phase transition	GO_BiologicalProcess-GOA_09.02.2016_16h18	0.017	0.048	[5, 6, 7, 8]	11.5385	21	[ANAPC10, CCNA2, CCND1, CDK1, CDKN1A, DUSP1, FANCI, FOXO4, GIGYF2, PSMA3, PSMA5, PSMA7, PSMB4, PSMC5, PSME3, PSMG2, SYF2, TTK, UBC, UBE2C, ZNF655]
GO:0010389	regulation of G2/M transition of mitotic cell cycle	GO_BiologicalProcess-GOA_09.02.2016_16h18	0.017	0.048	[6, 7, 8]	15.7895	9	[APP, CCNA2, CCND1, CDK1, FANCI, FOXO4, RAB11A, RAD51B, SYF2]
GO:1902600	hydrogen ion transmembrane transport	GO_BiologicalProcess-GOA_09.02.2016_16h18	0.017	0.048	[6, 7, 8, 9]	12.8205	15	[ATP1A1, ATP5G2, ATP5I, ATP6V0E1, COA6, COX5A, COX7A2, COX7A2L, COX7C, NDUFA4, SLC11A2, SLC47A1, STOML2, TMCO3, UQCRC1]
GO:0032535	regulation of cellular component size	GO_BiologicalProcess-GOA_09.02.2016_16h18	0.017	0.048	[3, 4]	10.1408	36	[ABL1, ADD1, ADNP, AKT1, AKT1S1, ANXA7, ARF1, ARPC3, CAPZB, CDC42EP1, CFL2, DLG1, DMTN, DPYSL2, DSTN, EDN1, EZR, FAM21C, GMFB, HIF1A, IQGAP2, L1CAM, MAP1B, NCAPG, NDEL1, NRP1, RAB11A, RAB3B, RDX, RNF6, TSC1, TTL, VASP, VIL1, WASF1, WASL]
GO:0042886	amide transport	GO_BiologicalProcess-GOA_09.02.2016_16h18	0.017	0.048	[4, 5]	9.97442	39	[ABAT, ABCA1, ARRB1, C8orf4, CACNA1D, CYLD, EDN1, EIF2AK3, FOXA2, GNAI2, GPLD1, HADH, HIF1A, HMGCR, IL1RN, JAK2, LITAF, NFKBIB, NOL3, NUCB2, PDE7A, PFKL, PIM3, PPP3CA, RPL10, SLC16A1, SLC19A2, SLC2A1, SLC2A2, SLC6A4, SPCS3, SSTR5, STXBP4, SYT7, SYTL4, TFR2, UBE2Q1, UPK3A, UQCC2]
GO:0009100	glycoprotein metabolic process	GO_BiologicalProcess-GOA_09.02.2016_16h18	0.017	0.048	[4, 5]	9.42408	54	[ADAMTSL4, ADNP, ALG11, ANK2, B3GLCT, B4GALT2, CCDC126, CHPF, CNIH1, COG2, COPZ1, DCTN6, DPY19L3, DYNC1H1, F5, FUT6, GBF1, GLCE, GNPTAB, GOLPH3, GPC3, GXYLT1, HIF1A, HS3ST3B1, HS3ST5, IMPAD1, LIG1, MAGT1, MAN2A2, MIA3, MOGAT2, MVD, NECAB3, NGLY1, PAWR, PCSK6, PDCD6, PDIA3, PLCB1, POFUT1, POMT2, PPP6R3, PSEN1, PTGES2, RAB1B, SDC1, SEC24C, ST3GAL4, TFG, TMEM165, TNIP1, TRAPPC4, USF3, YKT6]
GO:1904950	negative regulation of establishment of protein localization	GO_BiologicalProcess-GOA_09.02.2016_16h18	0.017	0.048	[2, 3, 4, 5, 6]	11.0132	25	[ANXA4, APOA2, BARD1, BCL2L1, BTN2A2, CYLD, DAB2IP, DMTN, EZR, HADH, HMGCR, HSPH1, LITAF, LRRK2, LYPLA1, LYPLAL1, NFKBIB, NFKBIE, PFKL, PIM3, PPP3CA, RHBDF2, RPL10, SNX3, SYTL4]
GO:0050667	homocysteine metabolic process	GO_BiologicalProcess-GOA_09.02.2016_16h18	0.017	0.049	[4, 5, 6, 8, 9]	26.6667	4	[CPS1, CYP21A2, MPST, MTHFD1]
GO:0030182	neuron differentiation	GO_BiologicalProcess-GOA_09.02.2016_16h18	0.017	0.049	[5, 7, 8]	8.36408	136	[ABL1, ACSL4, ACTB, ADNP, AKT1, ANK2, APH1A, APP, ARF1, ARHGAP35, ARHGEF11, ARHGEF28, ARPC3, ATAT1, AXIN1, BAG1, BLOC1S6, BMP4, BNIP2, BRAF, BUD31, CACNA1D, CAPZB, CEP290, COPS2, CSNK2B, CTHRC1, CUL7, DAB2IP, DBN1, DCDC2, DDIT4, DFNA5, DKK1, DLG1, DOCK7, DPYSL2, DSCAML1, ECT2, EFNA1, EIF4E, EIF4G1, EPHA1, ERCC2, EZR, FAT4, FEZ2, FKBPL, FOXA2, GDF11, GDNF, GDPD5, GFI1, GIGYF2, GIT1, HIF1A, HNRNPK,…
GO:0006553	lysine metabolic process	GO_BiologicalProcess-GOA_09.02.2016_16h18	0.017	0.049	[6, 7, 9, 10]	26.6667	4	[ALDH7A1, DLST, OGDH, PIPOX]
GO:0072528	pyrimidine-containing compound biosynthetic process	GO_BiologicalProcess-GOA_09.02.2016_16h18	0.017	0.049	[5]	16.6667	8	[CMPK1, CPS1, CYP21A2, DCK, DHODH, DUT, ERH, UCK2]
GO:0009130	pyrimidine nucleoside monophosphate biosynthetic process	GO_BiologicalProcess-GOA_09.02.2016_16h18	0.017	0.049	[6, 7, 8, 9]	26.6667	4	[CMPK1, DHODH, DUT, UCK2]
GO:0031331	positive regulation of cellular catabolic process	GO_BiologicalProcess-GOA_09.02.2016_16h18	0.017	0.049	[4, 5, 6]	10.241	34	[AKT1, ANAPC10, ARIH2, ATPIF1, AXIN1, BNIP3, CDK1, DAB2IP, DDRGK1, DNAJB2, EZR, GPLD1, HIF1A, LRRK2, MIA3, NFE2L2, PABPC1, PIP4K2C, PSEN1, PSMA3, PSMA5, PSMA7, PSMB4, PSMC5, PSME3, RACK1, RDX, TNFAIP3, TNRC6B, TRIB3, UBC, UBE2C, UQCC2, WAC]
GO:0010565	regulation of cellular ketone metabolic process	GO_BiologicalProcess-GOA_09.02.2016_16h18	0.017	0.049	[4, 5]	11.1111	24	[ACADM, AKT1, APOC1, APOC3, AZIN1, BRCA1, EIF2AK3, ERLIN1, GNMT, HPN, NQO1, NUCB2, PDHB, PDK1, PIBF1, PPARG, PSMA3, PSMA5, PSMA7, PSMB4, PSMC5, PSME3, SLC35B4, TRIB3]
GO:0033700	phospholipid efflux	GO_BiologicalProcess-GOA_09.02.2016_16h18	0.017	0.049	[6, 7, 8, 9]	26.6667	4	[ABCA1, APOA2, APOC1, APOC3]
GO:0000052	citrulline metabolic process	GO_BiologicalProcess-GOA_09.02.2016_16h18	0.017	0.049	[4, 5, 6, 8, 9]	26.6667	4	[CPS1, CYP21A2, DDAH1, SLC6A4]
GO:0035728	response to hepatocyte growth factor	GO_BiologicalProcess-GOA_09.02.2016_16h18	0.017	0.049	[5]	26.6667	4	[MBD4, MED1, NRP1, VIL1]
GO:0035729	cellular response to hepatocyte growth factor stimulus	GO_BiologicalProcess-GOA_09.02.2016_16h18	0.017	0.049	[6]	26.6667	4	[MBD4, MED1, NRP1, VIL1]
GO:0030178	negative regulation of Wnt signaling pathway	GO_BiologicalProcess-GOA_09.02.2016_16h18	0.017	0.049	[4, 5, 6, 7, 8]	11.2195	23	[AXIN1, CCND1, CHD8, CTHRC1, CYLD, DAB2IP, DKK1, EGR1, HMGXB4, IGFBP1, IGFBP6, LRP4, NKD1, PSMA3, PSMA5, PSMA7, PSMB4, PSMC5, PSME3, RACK1, SIAH2, SOX9, UBC]
GO:0010660	regulation of muscle cell apoptotic process	GO_BiologicalProcess-GOA_09.02.2016_16h18	0.017	0.049	[6, 7, 8]	16.6667	8	[ARRB1, BNIP3, EDN1, HMGCR, JAK2, NOL3, PDCD4, RBM10]
GO:0034390	smooth muscle cell apoptotic process	GO_BiologicalProcess-GOA_09.02.2016_16h18	0.017	0.049	[8]	26.6667	4	[ARRB1, EDN1, PDCD4, RBM10]
GO:0034391	regulation of smooth muscle cell apoptotic process	GO_BiologicalProcess-GOA_09.02.2016_16h18	0.017	0.049	[7, 8, 9]	26.6667	4	[ARRB1, EDN1, PDCD4, RBM10]
GO:0042541	hemoglobin biosynthetic process	GO_BiologicalProcess-GOA_09.02.2016_16h18	0.017	0.049	[5, 6]	26.6667	4	[HIF1A, KLF4, LDB1, SNX3]
GO:0044872	lipoprotein localization	GO_BiologicalProcess-GOA_09.02.2016_16h18	0.017	0.049	[4]	26.6667	4	[APOC3, MTTP, PPARG, UNC119B]
GO:0042953	lipoprotein transport	GO_BiologicalProcess-GOA_09.02.2016_16h18	0.017	0.049	[4, 5, 6]	26.6667	4	[APOC3, MTTP, PPARG, UNC119B]
GO:0070816	phosphorylation of RNA polymerase II C-terminal domain	GO_BiologicalProcess-GOA_09.02.2016_16h18	0.017	0.049	[7, 8, 9, 10, 11, 12]	26.6667	4	[CDK12, CDK13, GTF2H3, MCM2]
GO:0006312	mitotic recombination	GO_BiologicalProcess-GOA_09.02.2016_16h18	0.017	0.049	[6, 7, 8]	16.6667	8	[LIG1, MLH1, PRIM1, PRIM2, RAD51B, RFC3, TERF2, XRCC2]

## Sheet: Low-dose DOPO GO terms
GOID	GOTerm	Ontology Source	Term PValue	Term PValue Corrected with Benjamini-Hochberg	% Associated Genes	Nr. Genes	Associated Genes Found
GO:0048661	positive regulation of smooth muscle cell proliferation	GO_BiologicalProcess-GOA_09.02.2016_16h18	7.6e-05	0.00057	7.8125	5	[DDX39B, EDN1, NAMPT, PPARGC1A, PTAFR]
GO:0070972	protein localization to endoplasmic reticulum	GO_BiologicalProcess-GOA_09.02.2016_16h18	6.2e-05	0.00059	4.82759	7	[ANK2, RPL10, RPL37A, RPS13, RPS16, RPS23, RPS9]
GO:0006613	cotranslational protein targeting to membrane	GO_BiologicalProcess-GOA_09.02.2016_16h18	0.00016	0.00063	5.04202	6	[RPL10, RPL37A, RPS13, RPS16, RPS23, RPS9]
GO:0045047	protein targeting to ER	GO_BiologicalProcess-GOA_09.02.2016_16h18	0.00018	0.00063	4.95868	6	[RPL10, RPL37A, RPS13, RPS16, RPS23, RPS9]
GO:0070200	establishment of protein localization to telomere	GO_BiologicalProcess-GOA_09.02.2016_16h18	0.00013	0.00063	20	3	[BRCA2, CCT2, CCT8]
GO:0006614	SRP-dependent cotranslational protein targeting to membrane	GO_BiologicalProcess-GOA_09.02.2016_16h18	0.00015	0.00064	5.12821	6	[RPL10, RPL37A, RPS13, RPS16, RPS23, RPS9]
GO:0001887	selenium compound metabolic process	GO_BiologicalProcess-GOA_09.02.2016_16h18	0.00022	0.00066	4.7619	6	[RPL10, RPL37A, RPS13, RPS16, RPS23, RPS9]
GO:0072599	establishment of protein localization to endoplasmic reticulum	GO_BiologicalProcess-GOA_09.02.2016_16h18	0.00021	0.00069	4.8	6	[RPL10, RPL37A, RPS13, RPS16, RPS23, RPS9]
GO:0000184	nuclear-transcribed mRNA catabolic process, nonsense-mediated decay	GO_BiologicalProcess-GOA_09.02.2016_16h18	0.00025	0.0007	4.65116	6	[RPL10, RPL37A, RPS13, RPS16, RPS23, RPS9]
GO:0033002	muscle cell proliferation	GO_BiologicalProcess-GOA_09.02.2016_16h18	0.00013	0.0007	4.29448	7	[DDX39B, EDN1, NAMPT, PPARGC1A, PTAFR, RPL10, STAT3]
GO:0016259	selenocysteine metabolic process	GO_BiologicalProcess-GOA_09.02.2016_16h18	5.7e-05	0.00072	6.12245	6	[RPL10, RPL37A, RPS13, RPS16, RPS23, RPS9]
GO:0048659	smooth muscle cell proliferation	GO_BiologicalProcess-GOA_09.02.2016_16h18	0.00012	0.00079	5.30973	6	[DDX39B, EDN1, NAMPT, PPARGC1A, PTAFR, RPL10]
GO:0009069	serine family amino acid metabolic process	GO_BiologicalProcess-GOA_09.02.2016_16h18	4.7e-05	0.0009	5.03597	7	[GCAT, RPL10, RPL37A, RPS13, RPS16, RPS23, RPS9]
GO:0070199	establishment of protein localization to chromosome	GO_BiologicalProcess-GOA_09.02.2016_16h18	0.0005	0.0011	13.0435	3	[BRCA2, CCT2, CCT8]
GO:0006415	translational termination	GO_BiologicalProcess-GOA_09.02.2016_16h18	3.9e-05	0.0014	4.34783	8	[MRPL42, MRPS36, RPL10, RPL37A, RPS13, RPS16, RPS23, RPS9]
GO:0048660	regulation of smooth muscle cell proliferation	GO_BiologicalProcess-GOA_09.02.2016_16h18	0.0008	0.0018	4.71698	5	[DDX39B, EDN1, NAMPT, PPARGC1A, PTAFR]
GO:0051297	centrosome organization	GO_BiologicalProcess-GOA_09.02.2016_16h18	0.001	0.0021	4.46429	5	[BRCA2, HAUS1, HAUS6, KIAA0101, STIL]
GO:0070198	protein localization to chromosome, telomeric region	GO_BiologicalProcess-GOA_09.02.2016_16h18	0.0011	0.0022	10	3	[BRCA2, CCT2, CCT8]
GO:0031023	microtubule organizing center organization	GO_BiologicalProcess-GOA_09.02.2016_16h18	0.0014	0.0027	4.13223	5	[BRCA2, HAUS1, HAUS6, KIAA0101, STIL]
GO:0051930	regulation of sensory perception of pain	GO_BiologicalProcess-GOA_09.02.2016_16h18	0.0027	0.0047	7.31707	3	[EDN1, PTAFR, RPL10]
GO:0051931	regulation of sensory perception	GO_BiologicalProcess-GOA_09.02.2016_16h18	0.0027	0.0047	7.31707	3	[EDN1, PTAFR, RPL10]
GO:0043094	cellular metabolic compound salvage	GO_BiologicalProcess-GOA_09.02.2016_16h18	0.0029	0.0048	7.14286	3	[DCK, ENOPH1, GOT1]
GO:0009124	nucleoside monophosphate biosynthetic process	GO_BiologicalProcess-GOA_09.02.2016_16h18	0.0042	0.0067	4.16667	4	[DCK, DUT, PPARGC1A, STAT3]
GO:0043484	regulation of RNA splicing	GO_BiologicalProcess-GOA_09.02.2016_16h18	0.0047	0.0072	4.0404	4	[ACIN1, HNRNPH1, RBM25, RPS13]
GO:0000096	sulfur amino acid metabolic process	GO_BiologicalProcess-GOA_09.02.2016_16h18	0.0057	0.008	5.66038	3	[ENOPH1, ETHE1, GOT1]
GO:0002753	cytoplasmic pattern recognition receptor signaling pathway	GO_BiologicalProcess-GOA_09.02.2016_16h18	0.0063	0.0085	5.45455	3	[DDX58, UBC, UBE2N]
GO:0071398	cellular response to fatty acid	GO_BiologicalProcess-GOA_09.02.2016_16h18	0.0063	0.0085	5.45455	3	[EDN1, PPARGC1A, PTAFR]
GO:0009066	aspartate family amino acid metabolic process	GO_BiologicalProcess-GOA_09.02.2016_16h18	0.0076	0.01	5.08475	3	[ENOPH1, GCAT, GOT1]
GO:0032922	circadian regulation of gene expression	GO_BiologicalProcess-GOA_09.02.2016_16h18	0.0088	0.011	4.83871	3	[NAMPT, NPAS2, PPARGC1A]
GO:0034502	protein localization to chromosome	GO_BiologicalProcess-GOA_09.02.2016_16h18	0.0092	0.011	4.7619	3	[BRCA2, CCT2, CCT8]
GO:1903793	positive regulation of anion transport	GO_BiologicalProcess-GOA_09.02.2016_16h18	0.01	0.011	4.61538	3	[EDN1, PTAFR, VAMP8]
GO:0006301	postreplication repair	GO_BiologicalProcess-GOA_09.02.2016_16h18	0.011	0.012	4.41176	3	[KIAA0101, UBC, UBE2N]
GO:0043502	regulation of muscle adaptation	GO_BiologicalProcess-GOA_09.02.2016_16h18	0.011	0.012	4.34783	3	[DDX39B, EDN1, PPARGC1A]
GO:0070911	global genome nucleotide-excision repair	GO_BiologicalProcess-GOA_09.02.2016_16h18	0.012	0.012	4.28571	3	[GTF2H3, UBC, UBE2N]
GO:1900543	negative regulation of purine nucleotide metabolic process	GO_BiologicalProcess-GOA_09.02.2016_16h18	0.012	0.012	4.28571	3	[EDN1, PPARGC1A, STAT3]
GO:1903076	regulation of protein localization to plasma membrane	GO_BiologicalProcess-GOA_09.02.2016_16h18	0.011	0.012	4.34783	3	[DAB2, NUMB, VAMP8]
GO:1904375	regulation of protein localization to cell periphery	GO_BiologicalProcess-GOA_09.02.2016_16h18	0.011	0.012	4.34783	3	[DAB2, NUMB, VAMP8]
GO:2001022	positive regulation of response to DNA damage stimulus	GO_BiologicalProcess-GOA_09.02.2016_16h18	0.012	0.012	4.28571	3	[NPAS2, PIAS4, UBE2N]
GO:0008593	regulation of Notch signaling pathway	GO_BiologicalProcess-GOA_09.02.2016_16h18	0.013	0.013	4.16667	3	[NUMB, RPL10, STAT3]
GO:0034146	toll-like receptor 5 signaling pathway	GO_BiologicalProcess-GOA_09.02.2016_16h18	0.013	0.013	4.10959	3	[NFKBIB, UBC, UBE2N]
GO:0034166	toll-like receptor 10 signaling pathway	GO_BiologicalProcess-GOA_09.02.2016_16h18	0.013	0.013	4.16667	3	[NFKBIB, UBC, UBE2N]
GO:0045980	negative regulation of nucleotide metabolic process	GO_BiologicalProcess-GOA_09.02.2016_16h18	0.013	0.013	4.16667	3	[EDN1, PPARGC1A, STAT3]
