# Supplementary material for: Transcriptome profiling of HepG2 cells exposed to the flame retardant 9,10-dihydro-9-oxa-10-phosphaphenanthrene 10-oxide (DOPO)
Source: Royal Society of Chemistry journal article supplement (doi:10.1039/c8tx00006a), 2018-01-01
Supplement: c8tx00006a1.zip [file Supplementary_File_3.xlsx]

## Sheet: Upregulated DEGs FC>2
File created with bingo (c) on 21-Jun-2016 at 11:04:56
ontology: namespace
curator: bingo
Selected ontology file : bundle://118.0:1/data/GO_Biological_Process
Selected annotation file : bundle://118.0:1/data/H_sapiens_default
Discarded evidence codes :
Overrepresentation
Selected statistical test : Hypergeometric test
Selected correction : Benjamini & Hochberg False Discovery Rate (FDR) correction
Selected significance level : 0.05
Testing option : Use whole annotation as reference set
The selected cluster :
DMGDH	IL1RN	TUBBP5	LOXL3	LDLRAD1	NCMAP	CDH5	COTL1	SLC25A47	ENPP7	IGFBP1	G6PC	SLC11A1	ACOT11	C8ORF4	PPAPDC3	ZSCAN16-AS1	NEIL2	LOX	FAR1	LSP1_1	ASF1B	LPPR1	PFKFB1	CHRNA2	PLGRKT	CDCA7	NREP	SLC30A10	CYP19A1	RP5-1120P11.3	KNG1	FAM172BP	PLAC8	ADH4	STRIP2	APOM	LCN15	ALDH3B1	APOF	ARSG	IGFBP6	APOBEC3C	MRPS17_2	CYP4F2	GPR97	DCDC2	TNRC6C-AS1	FAT4	SLC22A7
No annotations were retrieved for the following entities:
PLGRKT	PTGDR2	FAM69C	C1ORF170	LDLRAD1	HRCT1	NREP	RP11-683L23.1	NCMAP	RP5-1120P11.3	FAM172BP	RP11-15H20.6	STRIP2	PDLIM2	MRPS17_2	PPAPDC3	TNRC6C-AS1	TMC6	AC025335.1	ZSCAN16-AS1	TMEM218	TM4SF1-AS1	LINC00222	LSP1_1	LINC00467
GO-ID	p-value	corr p-value	x	n	X	N	Description	Genes in test set
44281	3.5694e-06	0.0027196	21	1368	74	14302	small molecule metabolic process	DMGDH|PFKFB1|EDN1|G6PC|GPX3|CYP4F2|ACOT11|PTAFR|AKR1D1|PRODH2|DCK|HSD17B8|SORL1|GNMT|DHODH|ADH4|ALDH3B1|APOF|FAR1|RBKS|TRDMT1
8645	1.0589e-05	0.0027196	4	27	74	14302	hexose transport	EDN1|G6PC|SLC2A2|SLC2A3
15758	1.0589e-05	0.0027196	4	27	74	14302	glucose transport	EDN1|G6PC|SLC2A2|SLC2A3
15749	1.2306e-05	0.0027196	4	28	74	14302	monosaccharide transport	EDN1|G6PC|SLC2A2|SLC2A3
6066	1.2661e-05	0.0027196	11	432	74	14302	alcohol metabolic process	DMGDH|PFKFB1|ADH4|G6PC|ALDH3B1|PTAFR|AKR1D1|APOF|SORL1|RBKS|GNMT
6629	1.9145e-05	0.0030646	15	833	74	14302	lipid metabolic process	EDN1|G6PC|CYP4F2|ACOT11|AKR1D1|CYP19A1|HSD17B8|SORL1|PLAC8|ADH4|LCN15|ALDH3B1|APOF|FAR1|ENPP7
55114	2.3361e-05	0.0030646	13	645	74	14302	oxidation reduction	DMGDH|GPX3|CYP4F2|AKR1D1|LOXL3|CYP19A1|PRODH2|HSD17B8|DHODH|ADH4|LOX|ALDH3B1|FAR1
32787	2.5884e-05	0.0030646	9	304	74	14302	monocarboxylic acid metabolic process	PFKFB1|ADH4|EDN1|G6PC|CYP4F2|ACOT11|AKR1D1|FAR1|HSD17B8
43436	2.8535e-05	0.0030646	12	562	74	14302	oxoacid metabolic process	DMGDH|PFKFB1|ADH4|EDN1|G6PC|CYP4F2|ACOT11|AKR1D1|FAR1|PRODH2|HSD17B8|GNMT
19752	2.8535e-05	0.0030646	12	562	74	14302	carboxylic acid metabolic process	DMGDH|PFKFB1|ADH4|EDN1|G6PC|CYP4F2|ACOT11|AKR1D1|FAR1|PRODH2|HSD17B8|GNMT
6082	3.2216e-05	0.0031455	12	569	74	14302	organic acid metabolic process	DMGDH|PFKFB1|ADH4|EDN1|G6PC|CYP4F2|ACOT11|AKR1D1|FAR1|PRODH2|HSD17B8|GNMT
42180	3.6305e-05	0.0032493	12	576	74	14302	cellular ketone metabolic process	DMGDH|PFKFB1|ADH4|EDN1|G6PC|CYP4F2|ACOT11|AKR1D1|FAR1|PRODH2|HSD17B8|GNMT
8209	5.786e-05	0.0047801	3	15	74	14302	androgen metabolic process	AKR1D1|CYP19A1|HSD17B8
8643	0.0002757	0.02115	4	61	74	14302	carbohydrate transport	EDN1|G6PC|SLC2A2|SLC2A3
50819	0.00031738	0.022724	3	26	74	14302	negative regulation of coagulation	EDN1|HS3ST5|KNG1
34754	0.00037342	0.025066	4	66	74	14302	cellular hormone metabolic process	ADH4|AKR1D1|CYP19A1|HSD17B8
44283	0.00045639	0.028833	9	444	74	14302	small molecule biosynthetic process	PFKFB1|EDN1|G6PC|PTAFR|AKR1D1|FAR1|PRODH2|HSD17B8|DHODH
30147	0.0005454	0.032542	2	7	74	14302	natriuresis	EDN1|KNG1
8202	0.00071664	0.037581	6	208	74	14302	steroid metabolic process	G6PC|AKR1D1|APOF|CYP19A1|HSD17B8|SORL1
30146	0.00072476	0.037581	2	8	74	14302	diuresis	EDN1|KNG1
6631	0.00073483	0.037581	6	209	74	14302	fatty acid metabolic process	ADH4|EDN1|CYP4F2|ACOT11|FAR1|HSD17B8
[truncated: 49 more columns]

## Sheet: Downregulated DEGs FC>2
File created with bingo (c) on 21-Jun-2016 at 11:06:14
ontology: namespace
curator: bingo
Selected ontology file : bundle://118.0:1/data/GO_Biological_Process
Selected annotation file : bundle://118.0:1/data/H_sapiens_default
Discarded evidence codes :
Overrepresentation
Selected statistical test : Hypergeometric test
Selected correction : Benjamini & Hochberg False Discovery Rate (FDR) correction
Selected significance level : 0.05
Testing option : Use whole annotation as reference set
The selected cluster :
PIWIL2	SERPINA3	CTC-471F3.5	GFI1	LRRK2	DNHD1	JADE2	CALB2	AC019181.2	CAPN8	DUSP10	CYP21A1P	EVA1B	CTSK	MBNL1	GPX2	LAG3	SPINK1	DDX58	OSR1	ANK2	NPNT	SYTL4	POU5F1	C1ORF116	CYP21A2	PPAP2A	ATF7	ROR1	ALPK3	S100A3	RBM23	DSCAML1	PPIC	ITIH5	LINC01134	AK1	CACNA1D	TMEM164	GNAI1	PAPSS2	RP11-96H19.1	ARSI	KIF3C	OTX1	KLHL29	EGR1	GDF11	ATP8B2	RP11-986E7.7
No annotations were retrieved for the following entities:
KLHL29	SPINK1	LINC01134	CTC-471F3.5	RP11-986E7.7	IFFO2	TMEM164	AC068039.4	CALB2	AC019181.2	C1ORF116	CYP21A1P	EVA1B	RP11-96H19.1	IGFL4	ARSI	MANSC1	S100A3	ZNF852
GO-ID	p-value	corr p-value	x	n	X	N	Description	Genes in test set
45165	6.6105e-06	0.0058701	6	136	49	14304	cell fate commitment	GDNF|GFI1|KLF4|DSCAML1|POU5F1|TBX2
48598	1.6606e-05	0.007373	8	336	49	14304	embryonic morphogenesis	MBNL1|GDNF|GFI1|OSR1|OTX1|KLF4|DSCAML1|POU5F1
45596	0.00013959	0.029038	6	234	49	14304	negative regulation of cell differentiation	PIWIL2|GDF11|GFI1|OSR1|NFKBID|POU5F1
1709	0.00015873	0.029038	3	31	49	14304	cell fate determination	KLF4|DSCAML1|TBX2
9653	0.0001665	0.029038	13	1218	49	14304	anatomical structure morphogenesis	GDF11|MBNL1|GFI1|OSR1|KLF4|POU5F1|TBX2|IGSF10|GDNF|ROR1|OTX1|PNPLA6|DSCAML1
48513	0.0001979	0.029038	16	1792	49	14304	organ development	EGR1|GDF11|MBNL1|GFI1|OSR1|KLF4|POU5F1|TBX2|IGSF10|GDNF|ROR1|ALPK3|OTX1|PNPLA6|DSCAML1|MURC
1656	0.0002289	0.029038	3	35	49	14304	metanephros development	GDF11|GDNF|OSR1
9887	0.0002641	0.029315	9	635	49	14304	organ morphogenesis	GDF11|GDNF|GFI1|OSR1|OTX1|PNPLA6|KLF4|DSCAML1|TBX2
72009	0.00031769	0.030094	2	8	49	14304	nephron epithelium development	GDNF|OSR1
7275	0.00038669	0.030094	21	2972	49	14304	multicellular organismal development	PIWIL2|EGR1|GDF11|MBNL1|GFI1|LRRK2|OSR1|NPNT|KLF4|POU5F1|PAPSS2|TBX2|IGSF10|GDNF|CTSK|ROR1|ALPK3|OTX1|PNPLA6|DSCAML1|MURC
51093	0.00043515	0.030094	6	289	49	14304	negative regulation of developmental process	PIWIL2|GDF11|GFI1|OSR1|NFKBID|POU5F1
10453	0.00050834	0.030094	2	10	49	14304	regulation of cell fate commitment	GFI1|POU5F1
72073	0.00050834	0.030094	2	10	49	14304	kidney epithelium development	GDNF|OSR1
60795	0.00050834	0.030094	2	10	49	14304	cell fate commitment involved in the formation of primary germ layers	KLF4|POU5F1
42659	0.00050834	0.030094	2	10	49	14304	regulation of cell fate specification	GFI1|POU5F1
48731	0.00069239	0.038428	18	2422	49	14304	system development	EGR1|GDF11|MBNL1|GFI1|OSR1|KLF4|POU5F1|PAPSS2|TBX2|IGSF10|GDNF|CTSK|ROR1|ALPK3|OTX1|PNPLA6|DSCAML1|MURC
48856	0.00074145	0.03873	19	2656	49	14304	anatomical structure development	PIWIL2|EGR1|GDF11|MBNL1|GFI1|OSR1|KLF4|POU5F1|PAPSS2|TBX2|IGSF10|GDNF|CTSK|ROR1|ALPK3|OTX1|PNPLA6|DSCAML1|MURC
9790	0.0009106	0.044923	8	601	49	14304	embryonic development	MBNL1|GDNF|GFI1|OSR1|OTX1|KLF4|DSCAML1|POU5F1
30154	0.001054	0.049261	14	1668	49	14304	cell differentiation	PIWIL2|EGR1|GDF11|MBNL1|GFI1|NPNT|KLF4|POU5F1|TBX2|IGSF10|GDNF|ROR1|DSCAML1|MURC
[truncated: 18 more columns]
