# Supplementary material for: Transcriptome profiling of HepG2 cells exposed to the flame retardant 9,10-dihydro-9-oxa-10-phosphaphenanthrene 10-oxide (DOPO)
Source: Royal Society of Chemistry journal article supplement (doi:10.1039/c8tx00006a), 2018-01-01
Supplement: c8tx00006a1.zip [file Supplementary_File_4.xlsx]

## Sheet: High Dose GSEA report
NAME	GS<br> follow link to MSigDB	GS DETAILS	SIZE	ES	NES	NOM p-val	FDR q-val	FWER p-val	RANK AT MAX	LEADING EDGE
KEGG_PEROXISOME	KEGG_PEROXISOME	Details ...	78	0.715356	1.51603	0.0075188	0.24861	0.518	4431	tags=53%, list=8%, signal=57%
KEGG_DNA_REPLICATION	KEGG_DNA_REPLICATION	Details ...	36	0.803204	1.53452	0.00754717	0.281505	0.416	3739	tags=72%, list=6%, signal=77%
KEGG_VALINE_LEUCINE_AND_ISOLEUCINE_DEGRADATION	KEGG_VALINE_LEUCINE_AND_ISOLEUCINE_DEGRADATION	Details ...	44	0.712777	1.41469	0.0405904	0.292424	0.917	8088	tags=75%, list=14%, signal=87%
KEGG_TYROSINE_METABOLISM	KEGG_TYROSINE_METABOLISM	Details ...	42	0.719529	1.38552	0.0426357	0.296513	0.969	3445	tags=48%, list=6%, signal=51%
KEGG_HOMOLOGOUS_RECOMBINATION	KEGG_HOMOLOGOUS_RECOMBINATION	Details ...	28	0.780245	1.39336	0.0560928	0.301491	0.963	4175	tags=57%, list=7%, signal=62%
KEGG_GLYCINE_SERINE_AND_THREONINE_METABOLISM	KEGG_GLYCINE_SERINE_AND_THREONINE_METABOLISM	Details ...	31	0.779783	1.42226	0.0471513	0.304188	0.899	5935	tags=68%, list=10%, signal=75%
KEGG_PPAR_SIGNALING_PATHWAY	KEGG_PPAR_SIGNALING_PATHWAY	Details ...	69	0.709151	1.48027	0.00559702	0.304401	0.7	5980	tags=51%, list=10%, signal=57%
KEGG_CYSTEINE_AND_METHIONINE_METABOLISM	KEGG_CYSTEINE_AND_METHIONINE_METABOLISM	Details ...	34	0.741718	1.36476	0.0748175	0.308373	0.986	4222	tags=41%, list=7%, signal=44%
KEGG_PATHOGENIC_ESCHERICHIA_COLI_INFECTION	KEGG_PATHOGENIC_ESCHERICHIA_COLI_INFECTION	Details ...	55	0.689606	1.37147	0.0371747	0.312742	0.982	6430	tags=51%, list=11%, signal=57%
KEGG_PYRIMIDINE_METABOLISM	KEGG_PYRIMIDINE_METABOLISM	Details ...	95	0.63947	1.39803	0.0207939	0.316234	0.952	7165	tags=59%, list=12%, signal=67%
KEGG_HISTIDINE_METABOLISM	KEGG_HISTIDINE_METABOLISM	Details ...	28	0.806517	1.42556	0.0444015	0.333841	0.885	7503	tags=68%, list=13%, signal=78%
KEGG_OXIDATIVE_PHOSPHORYLATION	KEGG_OXIDATIVE_PHOSPHORYLATION	Details ...	113	0.613004	1.34653	0.0258303	0.337259	0.994	7917	tags=56%, list=14%, signal=64%
KEGG_MISMATCH_REPAIR	KEGG_MISMATCH_REPAIR	Details ...	23	0.764257	1.33481	0.104563	0.352104	0.997	3739	tags=70%, list=6%, signal=74%
KEGG_FATTY_ACID_METABOLISM	KEGG_FATTY_ACID_METABOLISM	Details ...	42	0.748911	1.42912	0.0252252	0.374418	0.879	6095	tags=64%, list=11%, signal=72%
KEGG_RIBOSOME	KEGG_RIBOSOME	Details ...	88	0.666765	1.44441	0.0141844	0.37471	0.832	9093	tags=67%, list=16%, signal=79%
KEGG_GLUTATHIONE_METABOLISM	KEGG_GLUTATHIONE_METABOLISM	Details ...	50	0.654591	1.30797	0.0675183	0.389322	1	3593	tags=44%, list=6%, signal=47%
KEGG_CITRATE_CYCLE_TCA_CYCLE	KEGG_CITRATE_CYCLE_TCA_CYCLE	Details ...	29	0.719376	1.299	0.101365	0.394637	1	6794	tags=62%, list=12%, signal=70%
KEGG_AUTOIMMUNE_THYROID_DISEASE	KEGG_AUTOIMMUNE_THYROID_DISEASE	Details ...	50	0.668894	1.31317	0.0753676	0.395929	1	8559	tags=24%, list=15%, signal=28%
KEGG_AMINOACYL_TRNA_BIOSYNTHESIS	KEGG_AMINOACYL_TRNA_BIOSYNTHESIS	Details ...	41	0.668087	1.29022	0.104167	0.400272	1	7612	tags=61%, list=13%, signal=70%
KEGG_ASTHMA	KEGG_ASTHMA	Details ...	28	0.860009	1.54782	0.00571429	0.43886	0.338	5882	tags=18%, list=10%, signal=20%
KEGG_PORPHYRIN_AND_CHLOROPHYLL_METABOLISM	KEGG_PORPHYRIN_AND_CHLOROPHYLL_METABOLISM		40	0.638708	1.21998	0.162109	0.459937	1	6240	tags=58%, list=11%, signal=64%
KEGG_TRYPTOPHAN_METABOLISM	KEGG_TRYPTOPHAN_METABOLISM		39	0.644963	1.22185	0.164773	0.469986	1	7503	tags=51%, list=13%, signal=59%
KEGG_GLYCOLYSIS_GLUCONEOGENESIS	KEGG_GLYCOLYSIS_GLUCONEOGENESIS		61	0.622561	1.25994	0.0930233	0.471811	1	6710	tags=51%, list=12%, signal=57%
KEGG_ALLOGRAFT_REJECTION	KEGG_ALLOGRAFT_REJECTION		35	0.653366	1.22461	0.165714	0.47875	1	6408	tags=23%, list=11%, signal=26%
KEGG_BASE_EXCISION_REPAIR	KEGG_BASE_EXCISION_REPAIR		34	0.669527	1.24879	0.159555	0.485344	1	6639	tags=68%, list=11%, signal=76%
KEGG_PURINE_METABOLISM	KEGG_PURINE_METABOLISM		154	0.53693	1.235	0.0561404	0.485842	1	7430	tags=53%, list=13%, signal=61%
KEGG_ALANINE_ASPARTATE_AND_GLUTAMATE_METABOLISM	KEGG_ALANINE_ASPARTATE_AND_GLUTAMATE_METABOLISM		32	0.654956	1.20508	0.179537	0.48768	1	3383	tags=47%, list=6%, signal=50%
KEGG_PARKINSONS_DISEASE	KEGG_PARKINSONS_DISEASE		109	0.557795	1.22543	0.0789946	0.494787	1	7917	tags=56%, list=14%, signal=65%
KEGG_GLYCOSAMINOGLYCAN_BIOSYNTHESIS_HEPARAN_SULFATE	KEGG_GLYCOSAMINOGLYCAN_BIOSYNTHESIS_HEPARAN_SULFATE		26	0.662705	1.18536	0.201117	0.5007	1	9321	tags=54%, list=16%, signal=64%
KEGG_DRUG_METABOLISM_CYTOCHROME_P450	KEGG_DRUG_METABOLISM_CYTOCHROME_P450		71	0.58041	1.23507	0.0996441	0.506628	1	4766	tags=41%, list=8%, signal=44%
KEGG_PYRUVATE_METABOLISM	KEGG_PYRUVATE_METABOLISM		39	0.614121	1.17737	0.202532	0.509488	1	8035	tags=62%, list=14%, signal=71%
KEGG_PENTOSE_PHOSPHATE_PATHWAY	KEGG_PENTOSE_PHOSPHATE_PATHWAY		26	0.680076	1.19303	0.241905	0.510267	1	6710	tags=50%, list=12%, signal=57%
KEGG_PHENYLALANINE_METABOLISM	KEGG_PHENYLALANINE_METABOLISM		18	0.738511	1.1866	0.256757	0.513368	1	3445	tags=56%, list=6%, signal=59%
KEGG_ONE_CARBON_POOL_BY_FOLATE	KEGG_ONE_CARBON_POOL_BY_FOLATE		17	0.703342	1.13386	0.301676	0.543388	1	6485	tags=76%, list=11%, signal=86%
KEGG_HUNTINGTONS_DISEASE	KEGG_HUNTINGTONS_DISEASE		168	0.496512	1.14543	0.15035	0.549115	1	7917	tags=51%, list=14%, signal=59%
KEGG_CELL_CYCLE	KEGG_CELL_CYCLE		123	0.518278	1.15917	0.137546	0.551889	1	7804	tags=52%, list=14%, signal=60%
KEGG_FRUCTOSE_AND_MANNOSE_METABOLISM	KEGG_FRUCTOSE_AND_MANNOSE_METABOLISM		34	0.606957	1.13548	0.238004	0.552307	1	6710	tags=53%, list=12%, signal=60%
KEGG_ARGININE_AND_PROLINE_METABOLISM	KEGG_ARGININE_AND_PROLINE_METABOLISM		53	0.572494	1.14888	0.20438	0.553473	1	7166	tags=53%, list=12%, signal=60%
KEGG_CELL_ADHESION_MOLECULES_CAMS	KEGG_CELL_ADHESION_MOLECULES_CAMS		130	0.503334	1.13917	0.167236	0.555409	1	6891	tags=32%, list=12%, signal=37%
KEGG_NUCLEOTIDE_EXCISION_REPAIR	KEGG_NUCLEOTIDE_EXCISION_REPAIR		44	0.599556	1.15275	0.216822	0.556911	1	7515	tags=66%, list=13%, signal=76%
KEGG_GLYOXYLATE_AND_DICARBOXYLATE_METABOLISM	KEGG_GLYOXYLATE_AND_DICARBOXYLATE_METABOLISM		16	0.710108	1.11427	0.323864	0.590989	1	6794	tags=75%, list=12%, signal=85%
KEGG_NICOTINATE_AND_NICOTINAMIDE_METABOLISM	KEGG_NICOTINATE_AND_NICOTINAMIDE_METABOLISM		22	0.660762	1.10401	0.315498	0.594871	1	6477	tags=68%, list=11%, signal=77%
KEGG_RIBOFLAVIN_METABOLISM	KEGG_RIBOFLAVIN_METABOLISM		16	0.699671	1.10608	0.346296	0.602004	1	4578	tags=50%, list=8%, signal=54%
KEGG_BIOSYNTHESIS_OF_UNSATURATED_FATTY_ACIDS	KEGG_BIOSYNTHESIS_OF_UNSATURATED_FATTY_ACIDS		22	0.642468	1.07091	0.345865	0.648353	1	7963	tags=64%, list=14%, signal=74%
KEGG_NITROGEN_METABOLISM	KEGG_NITROGEN_METABOLISM		23	0.620664	1.0714	0.346591	0.660679	1	5729	tags=48%, list=10%, signal=53%
KEGG_BETA_ALANINE_METABOLISM	KEGG_BETA_ALANINE_METABOLISM		22	0.629675	1.05656	0.3902	0.667339	1	6095	tags=59%, list=11%, signal=66%
KEGG_GRAFT_VERSUS_HOST_DISEASE	KEGG_GRAFT_VERSUS_HOST_DISEASE		37	0.570664	1.07191	0.335206	0.673827	1	6408	tags=22%, list=11%, signal=24%
KEGG_STEROID_BIOSYNTHESIS	KEGG_STEROID_BIOSYNTHESIS		16	0.694183	1.07439	0.380198	0.680164	1	6547	tags=63%, list=11%, signal=70%
KEGG_VIRAL_MYOCARDITIS	KEGG_VIRAL_MYOCARDITIS		68	0.507003	1.05674	0.316434	0.680798	1	6408	tags=34%, list=11%, signal=38%
KEGG_PANTOTHENATE_AND_COA_BIOSYNTHESIS	KEGG_PANTOTHENATE_AND_COA_BIOSYNTHESIS		16	0.657522	1.04758	0.395393	0.684488	1	5964	tags=44%, list=10%, signal=49%
KEGG_TYPE_I_DIABETES_MELLITUS	KEGG_TYPE_I_DIABETES_MELLITUS		41	0.540714	1.04337	0.371429	0.684498	1	7954	tags=32%, list=14%, signal=37%
KEGG_TERPENOID_BACKBONE_BIOSYNTHESIS	KEGG_TERPENOID_BACKBONE_BIOSYNTHESIS		15	0.639627	1.00741	0.460695	0.689448	1	8088	tags=73%, list=14%, signal=85%
KEGG_PROPANOATE_METABOLISM	KEGG_PROPANOATE_METABOLISM		32	0.584229	1.03256	0.413919	0.693554	1	8035	tags=59%, list=14%, signal=69%
KEGG_GAP_JUNCTION	KEGG_GAP_JUNCTION		89	0.45678	0.994252	0.466019	0.697056	1	7673	tags=36%, list=13%, signal=41%
KEGG_GALACTOSE_METABOLISM	KEGG_GALACTOSE_METABOLISM		25	0.588728	1.02729	0.419847	0.697742	1	2679	tags=40%, list=5%, signal=42%
KEGG_STARCH_AND_SUCROSE_METABOLISM	KEGG_STARCH_AND_SUCROSE_METABOLISM		51	0.507052	1.00788	0.436673	0.699793	1	3679	tags=37%, list=6%, signal=40%
KEGG_METABOLISM_OF_XENOBIOTICS_BY_CYTOCHROME_P450	KEGG_METABOLISM_OF_XENOBIOTICS_BY_CYTOCHROME_P450		69	0.479133	0.999899	0.434622	0.701474	1	4766	tags=39%, list=8%, signal=43%
KEGG_SELENOAMINO_ACID_METABOLISM	KEGG_SELENOAMINO_ACID_METABOLISM		26	0.573226	0.996016	0.443114	0.702141	1	7634	tags=58%, list=13%, signal=66%
KEGG_ADIPOCYTOKINE_SIGNALING_PATHWAY	KEGG_ADIPOCYTOKINE_SIGNALING_PATHWAY		67	0.501022	1.03378	0.380692	0.702624	1	7052	tags=43%, list=12%, signal=49%
KEGG_SPLICEOSOME	KEGG_SPLICEOSOME		124	0.452076	1.01815	0.381119	0.703249	1	8005	tags=47%, list=14%, signal=54%
KEGG_LEUKOCYTE_TRANSENDOTHELIAL_MIGRATION	KEGG_LEUKOCYTE_TRANSENDOTHELIAL_MIGRATION		114	0.456903	1.02165	0.375643	0.703933	1	7241	tags=37%, list=13%, signal=42%
KEGG_ASCORBATE_AND_ALDARATE_METABOLISM	KEGG_ASCORBATE_AND_ALDARATE_METABOLISM		24	0.543578	0.955489	0.509615	0.707596	1	4853	tags=50%, list=8%, signal=55%
KEGG_PRIMARY_BILE_ACID_BIOSYNTHESIS	KEGG_PRIMARY_BILE_ACID_BIOSYNTHESIS		16	0.640533	1.01286	0.442561	0.708016	1	5602	tags=44%, list=10%, signal=48%
KEGG_ARACHIDONIC_ACID_METABOLISM	KEGG_ARACHIDONIC_ACID_METABOLISM		58	0.499381	1.00892	0.443203	0.708489	1	3816	tags=28%, list=7%, signal=30%
KEGG_AMINO_SUGAR_AND_NUCLEOTIDE_SUGAR_METABOLISM	KEGG_AMINO_SUGAR_AND_NUCLEOTIDE_SUGAR_METABOLISM		43	0.499127	0.955932	0.536101	0.716115	1	8141	tags=47%, list=14%, signal=54%
KEGG_RENIN_ANGIOTENSIN_SYSTEM	KEGG_RENIN_ANGIOTENSIN_SYSTEM		16	0.599968	0.941649	0.552268	0.719671	1	2160	tags=19%, list=4%, signal=19%
KEGG_ALZHEIMERS_DISEASE	KEGG_ALZHEIMERS_DISEASE		153	0.412604	0.946529	0.602131	0.724418	1	7917	tags=49%, list=14%, signal=57%
KEGG_GLYCOSYLPHOSPHATIDYLINOSITOL_GPI_ANCHOR_BIOSYNTHESIS	KEGG_GLYCOSYLPHOSPHATIDYLINOSITOL_GPI_ANCHOR_BIOSYNTHESIS		25	0.548446	0.956387	0.527725	0.724878	1	7684	tags=68%, list=13%, signal=78%
KEGG_DRUG_METABOLISM_OTHER_ENZYMES	KEGG_DRUG_METABOLISM_OTHER_ENZYMES		50	0.477463	0.942626	0.557656	0.726334	1	5981	tags=46%, list=10%, signal=51%
KEGG_PROTEIN_EXPORT	KEGG_PROTEIN_EXPORT		24	0.557001	0.966337	0.508637	0.727856	1	8171	tags=54%, list=14%, signal=63%
KEGG_RNA_DEGRADATION	KEGG_RNA_DEGRADATION		59	0.465483	0.95781	0.521657	0.731161	1	7075	tags=46%, list=12%, signal=52%
KEGG_PENTOSE_AND_GLUCURONATE_INTERCONVERSIONS	KEGG_PENTOSE_AND_GLUCURONATE_INTERCONVERSIONS		26	0.550947	0.968561	0.5	0.731938	1	6404	tags=62%, list=11%, signal=69%
KEGG_BUTANOATE_METABOLISM	KEGG_BUTANOATE_METABOLISM		34	0.522279	0.969439	0.497164	0.739954	1	6095	tags=44%, list=11%, signal=49%
KEGG_NEUROACTIVE_LIGAND_RECEPTOR_INTERACTION	KEGG_NEUROACTIVE_LIGAND_RECEPTOR_INTERACTION		269	0.399461	0.957842	0.591667	0.741654	1	7186	tags=19%, list=12%, signal=22%
KEGG_RNA_POLYMERASE	KEGG_RNA_POLYMERASE		28	0.535046	0.973262	0.499022	0.750497	1	7165	tags=50%, list=12%, signal=57%
KEGG_RETINOL_METABOLISM	KEGG_RETINOL_METABOLISM		63	0.472252	0.969456	0.503597	0.751277	1	4766	tags=35%, list=8%, signal=38%
KEGG_CALCIUM_SIGNALING_PATHWAY	KEGG_CALCIUM_SIGNALING_PATHWAY		175	0.395435	0.919835	0.687609	0.772409	1	5977	tags=25%, list=10%, signal=28%
KEGG_HEMATOPOIETIC_CELL_LINEAGE	KEGG_HEMATOPOIETIC_CELL_LINEAGE		84	0.427098	0.911215	0.626594	0.787056	1	6345	tags=24%, list=11%, signal=27%
KEGG_MATURITY_ONSET_DIABETES_OF_THE_YOUNG	KEGG_MATURITY_ONSET_DIABETES_OF_THE_YOUNG		25	0.495228	0.874029	0.658041	0.850969	1	7499	tags=32%, list=13%, signal=37%
KEGG_NATURAL_KILLER_CELL_MEDIATED_CYTOTOXICITY	KEGG_NATURAL_KILLER_CELL_MEDIATED_CYTOTOXICITY		130	0.392046	0.87684	0.787346	0.85296	1	8043	tags=32%, list=14%, signal=37%
KEGG_GLYCOSAMINOGLYCAN_BIOSYNTHESIS_CHONDROITIN_SULFATE	KEGG_GLYCOSAMINOGLYCAN_BIOSYNTHESIS_CHONDROITIN_SULFATE		22	0.52788	0.88179	0.642857	0.860597	1	8762	tags=55%, list=15%, signal=64%
KEGG_THYROID_CANCER	KEGG_THYROID_CANCER		29	0.483882	0.877708	0.659533	0.861069	1	8170	tags=48%, list=14%, signal=56%
KEGG_CARDIAC_MUSCLE_CONTRACTION	KEGG_CARDIAC_MUSCLE_CONTRACTION		72	0.408578	0.861084	0.756856	0.875694	1	6553	tags=38%, list=11%, signal=42%
KEGG_GLYCOSAMINOGLYCAN_BIOSYNTHESIS_KERATAN_SULFATE	KEGG_GLYCOSAMINOGLYCAN_BIOSYNTHESIS_KERATAN_SULFATE		15	0.541591	0.846835	0.663462	0.882149	1	3730	tags=33%, list=6%, signal=36%
KEGG_PRIMARY_IMMUNODEFICIENCY	KEGG_PRIMARY_IMMUNODEFICIENCY		34	0.460477	0.848576	0.714575	0.888267	1	5669	tags=24%, list=10%, signal=26%
KEGG_STEROID_HORMONE_BIOSYNTHESIS	KEGG_STEROID_HORMONE_BIOSYNTHESIS		54	0.420344	0.834941	0.800738	0.892226	1	3679	tags=33%, list=6%, signal=36%
KEGG_LYSOSOME	KEGG_LYSOSOME		117	0.373516	0.830044	0.919325	0.894021	1	7811	tags=40%, list=14%, signal=46%
KEGG_LYSINE_DEGRADATION	KEGG_LYSINE_DEGRADATION		44	0.442013	0.849922	0.750943	0.89523	1	8035	tags=52%, list=14%, signal=61%
KEGG_INSULIN_SIGNALING_PATHWAY	KEGG_INSULIN_SIGNALING_PATHWAY		136	0.36531	0.837025	0.943162	0.897005	1	7905	tags=39%, list=14%, signal=45%
KEGG_TASTE_TRANSDUCTION	KEGG_TASTE_TRANSDUCTION		50	0.405404	0.800955	0.848429	0.914187	1	8359	tags=16%, list=14%, signal=19%
KEGG_PROXIMAL_TUBULE_BICARBONATE_RECLAMATION	KEGG_PROXIMAL_TUBULE_BICARBONATE_RECLAMATION		21	0.481965	0.803879	0.76673	0.91921	1	4474	tags=43%, list=8%, signal=46%
KEGG_ABC_TRANSPORTERS	KEGG_ABC_TRANSPORTERS		43	0.418422	0.805581	0.814414	0.925896	1	6977	tags=47%, list=12%, signal=53%
KEGG_P53_SIGNALING_PATHWAY	KEGG_P53_SIGNALING_PATHWAY		68	0.387325	0.810352	0.892532	0.92667	1	8206	tags=40%, list=14%, signal=46%
KEGG_VIBRIO_CHOLERAE_INFECTION	KEGG_VIBRIO_CHOLERAE_INFECTION		54	0.378516	0.761197	0.952043	0.946015	1	6514	tags=24%, list=11%, signal=27%
KEGG_BLADDER_CANCER	KEGG_BLADDER_CANCER		42	0.396562	0.765871	0.932482	0.95035	1	7765	tags=45%, list=13%, signal=52%
KEGG_OOCYTE_MEIOSIS	KEGG_OOCYTE_MEIOSIS		111	0.351457	0.772982	1	0.950654	1	8253	tags=42%, list=14%, signal=49%
KEGG_GLYCOSAMINOGLYCAN_DEGRADATION	KEGG_GLYCOSAMINOGLYCAN_DEGRADATION		20	0.403884	0.667107	0.94347	0.992691	1	6826	tags=35%, list=12%, signal=40%

## Sheet: Low Dose GSEA report
NAME	GS<br> follow link to MSigDB	GS DETAILS	SIZE	ES	NES	NOM p-val	FDR q-val	FWER p-val	RANK AT MAX	LEADING EDGE
KEGG_PARKINSONS_DISEASE	KEGG_PARKINSONS_DISEASE	Details ...	109	0.711568	1.5604	0	0.103212	0.283	7913	tags=68%, list=14%, signal=79%
KEGG_RIBOSOME	KEGG_RIBOSOME	Details ...	88	0.739204	1.58029	0	0.110366	0.212	8494	tags=65%, list=15%, signal=76%
KEGG_PYRIMIDINE_METABOLISM	KEGG_PYRIMIDINE_METABOLISM	Details ...	95	0.705582	1.53855	0.00324675	0.121386	0.4	8368	tags=66%, list=14%, signal=77%
KEGG_OXIDATIVE_PHOSPHORYLATION	KEGG_OXIDATIVE_PHOSPHORYLATION	Details ...	113	0.67048	1.50478	0.0032	0.157269	0.573	8315	tags=66%, list=14%, signal=77%
KEGG_DNA_REPLICATION	KEGG_DNA_REPLICATION	Details ...	36	0.856407	1.59606	0.00341297	0.162632	0.158	3468	tags=75%, list=6%, signal=80%
KEGG_PROTEASOME	KEGG_PROTEASOME	Details ...	44	0.74524	1.46426	0.00880282	0.242084	0.789	8485	tags=68%, list=15%, signal=80%
KEGG_HUNTINGTONS_DISEASE	KEGG_HUNTINGTONS_DISEASE	Details ...	168	0.623421	1.43507	0.00161812	0.306123	0.899	7303	tags=54%, list=13%, signal=62%
KEGG_CELL_CYCLE	KEGG_CELL_CYCLE	Details ...	123	0.630945	1.40466	0.0030722	0.374441	0.965	7631	tags=59%, list=13%, signal=67%
KEGG_MISMATCH_REPAIR	KEGG_MISMATCH_REPAIR	Details ...	23	0.777975	1.32987	0.0972222	0.400708	0.998	5051	tags=70%, list=9%, signal=76%
KEGG_HOMOLOGOUS_RECOMBINATION	KEGG_HOMOLOGOUS_RECOMBINATION	Details ...	28	0.771384	1.37009	0.0769231	0.421277	0.989	5220	tags=57%, list=9%, signal=63%
KEGG_PATHOGENIC_ESCHERICHIA_COLI_INFECTION	KEGG_PATHOGENIC_ESCHERICHIA_COLI_INFECTION	Details ...	55	0.688595	1.38013	0.0395869	0.4237	0.983	7308	tags=53%, list=13%, signal=60%
KEGG_NUCLEOTIDE_EXCISION_REPAIR	KEGG_NUCLEOTIDE_EXCISION_REPAIR	Details ...	44	0.675473	1.31514	0.0830508	0.424449	0.998	8350	tags=64%, list=14%, signal=74%
KEGG_PEROXISOME	KEGG_PEROXISOME	Details ...	78	0.645724	1.34884	0.0281195	0.427513	0.994	7906	tags=56%, list=14%, signal=65%
KEGG_VALINE_LEUCINE_AND_ISOLEUCINE_DEGRADATION	KEGG_VALINE_LEUCINE_AND_ISOLEUCINE_DEGRADATION	Details ...	44	0.687979	1.33882	0.06	0.428853	0.997	6607	tags=57%, list=11%, signal=64%
KEGG_ALZHEIMERS_DISEASE	KEGG_ALZHEIMERS_DISEASE	Details ...	153	0.581012	1.32987	0.0174051	0.429255	0.998	7367	tags=54%, list=13%, signal=61%
KEGG_FATTY_ACID_METABOLISM	KEGG_FATTY_ACID_METABOLISM	Details ...	42	0.709198	1.35675	0.0596252	0.432358	0.991	7408	tags=48%, list=13%, signal=55%
KEGG_RNA_POLYMERASE	KEGG_RNA_POLYMERASE	Details ...	28	0.718194	1.28846	0.130909	0.496105	1	10073	tags=82%, list=17%, signal=99%
KEGG_GAP_JUNCTION	KEGG_GAP_JUNCTION	Details ...	89	0.590392	1.27946	0.0625	0.500336	1	7705	tags=39%, list=13%, signal=45%
KEGG_CITRATE_CYCLE_TCA_CYCLE	KEGG_CITRATE_CYCLE_TCA_CYCLE	Details ...	29	0.702085	1.26067	0.136824	0.539643	1	4334	tags=59%, list=8%, signal=63%
KEGG_GLUTATHIONE_METABOLISM	KEGG_GLUTATHIONE_METABOLISM		50	0.627892	1.23456	0.12825	0.582907	1	7870	tags=58%, list=14%, signal=67%
KEGG_ASTHMA	KEGG_ASTHMA	Details ...	28	0.695314	1.24102	0.166667	0.586188	1	4751	tags=14%, list=8%, signal=16%
KEGG_RNA_DEGRADATION	KEGG_RNA_DEGRADATION		59	0.578971	1.19051	0.148973	0.595713	1	9699	tags=59%, list=17%, signal=71%
KEGG_OOCYTE_MEIOSIS	KEGG_OOCYTE_MEIOSIS		111	0.544419	1.19124	0.110935	0.615955	1	8687	tags=48%, list=15%, signal=56%
KEGG_PROPANOATE_METABOLISM	KEGG_PROPANOATE_METABOLISM		32	0.658673	1.2152	0.175652	0.627861	1	7408	tags=56%, list=13%, signal=64%
KEGG_PROTEIN_EXPORT	KEGG_PROTEIN_EXPORT		24	0.685722	1.19252	0.219643	0.635798	1	8280	tags=54%, list=14%, signal=63%
KEGG_PYRUVATE_METABOLISM	KEGG_PYRUVATE_METABOLISM		39	0.61813	1.19679	0.1625	0.645054	1	4258	tags=44%, list=7%, signal=47%
KEGG_PURINE_METABOLISM	KEGG_PURINE_METABOLISM		154	0.526653	1.20238	0.0822148	0.648362	1	8368	tags=49%, list=14%, signal=57%
KEGG_GLYCINE_SERINE_AND_THREONINE_METABOLISM	KEGG_GLYCINE_SERINE_AND_THREONINE_METABOLISM		31	0.635346	1.16432	0.226381	0.671884	1	7697	tags=61%, list=13%, signal=71%
KEGG_HISTIDINE_METABOLISM	KEGG_HISTIDINE_METABOLISM		28	0.651812	1.14567	0.262887	0.678296	1	7640	tags=57%, list=13%, signal=66%
KEGG_SPLICEOSOME	KEGG_SPLICEOSOME		124	0.506646	1.14018	0.172241	0.678955	1	8735	tags=49%, list=15%, signal=58%
KEGG_BASE_EXCISION_REPAIR	KEGG_BASE_EXCISION_REPAIR		34	0.618952	1.14925	0.245347	0.686202	1	8333	tags=59%, list=14%, signal=69%
KEGG_GLYOXYLATE_AND_DICARBOXYLATE_METABOLISM	KEGG_GLYOXYLATE_AND_DICARBOXYLATE_METABOLISM		16	0.70285	1.12942	0.318264	0.700714	1	5974	tags=63%, list=10%, signal=70%
KEGG_BETA_ALANINE_METABOLISM	KEGG_BETA_ALANINE_METABOLISM		22	0.662995	1.12251	0.298932	0.705653	1	7666	tags=64%, list=13%, signal=73%
KEGG_BUTANOATE_METABOLISM	KEGG_BUTANOATE_METABOLISM		34	0.611786	1.14949	0.215827	0.708761	1	7408	tags=53%, list=13%, signal=61%
KEGG_AMINOACYL_TRNA_BIOSYNTHESIS	KEGG_AMINOACYL_TRNA_BIOSYNTHESIS		41	0.584744	1.10569	0.291312	0.730557	1	9571	tags=61%, list=17%, signal=73%
KEGG_CYSTEINE_AND_METHIONINE_METABOLISM	KEGG_CYSTEINE_AND_METHIONINE_METABOLISM		34	0.594584	1.09948	0.282416	0.734676	1	8020	tags=50%, list=14%, signal=58%
KEGG_GLYCOLYSIS_GLUCONEOGENESIS	KEGG_GLYCOLYSIS_GLUCONEOGENESIS		61	0.527338	1.0682	0.323024	0.745084	1	7799	tags=41%, list=13%, signal=47%
KEGG_N_GLYCAN_BIOSYNTHESIS	KEGG_N_GLYCAN_BIOSYNTHESIS		45	0.549085	1.07655	0.306897	0.747292	1	10063	tags=60%, list=17%, signal=73%
KEGG_ONE_CARBON_POOL_BY_FOLATE	KEGG_ONE_CARBON_POOL_BY_FOLATE		17	0.681889	1.10666	0.307407	0.747435	1	7235	tags=76%, list=13%, signal=87%
KEGG_AMINO_SUGAR_AND_NUCLEOTIDE_SUGAR_METABOLISM	KEGG_AMINO_SUGAR_AND_NUCLEOTIDE_SUGAR_METABOLISM		43	0.552239	1.07101	0.317114	0.752006	1	8221	tags=49%, list=14%, signal=57%
KEGG_TRYPTOPHAN_METABOLISM	KEGG_TRYPTOPHAN_METABOLISM		39	0.574979	1.08397	0.311151	0.755473	1	6494	tags=41%, list=11%, signal=46%
KEGG_PENTOSE_PHOSPHATE_PATHWAY	KEGG_PENTOSE_PHOSPHATE_PATHWAY		26	0.608519	1.07731	0.333925	0.763399	1	8953	tags=54%, list=15%, signal=64%
KEGG_PHENYLALANINE_METABOLISM	KEGG_PHENYLALANINE_METABOLISM		18	0.660657	1.08484	0.324275	0.772064	1	8020	tags=67%, list=14%, signal=77%
KEGG_TYROSINE_METABOLISM	KEGG_TYROSINE_METABOLISM		42	0.550214	1.05309	0.354892	0.785461	1	8020	tags=60%, list=14%, signal=69%
KEGG_GLYCOSAMINOGLYCAN_BIOSYNTHESIS_HEPARAN_SULFATE	KEGG_GLYCOSAMINOGLYCAN_BIOSYNTHESIS_HEPARAN_SULFATE		26	0.587437	1.04387	0.396797	0.803852	1	8236	tags=42%, list=14%, signal=49%
KEGG_GLYCOSAMINOGLYCAN_BIOSYNTHESIS_CHONDROITIN_SULFATE	KEGG_GLYCOSAMINOGLYCAN_BIOSYNTHESIS_CHONDROITIN_SULFATE		22	0.604586	1.033	0.398614	0.811026	1	7210	tags=50%, list=12%, signal=57%
KEGG_P53_SIGNALING_PATHWAY	KEGG_P53_SIGNALING_PATHWAY		68	0.491634	1.02359	0.394148	0.813672	1	7223	tags=43%, list=13%, signal=49%
KEGG_AUTOIMMUNE_THYROID_DISEASE	KEGG_AUTOIMMUNE_THYROID_DISEASE		50	0.515694	1.02793	0.389273	0.814172	1	5598	tags=18%, list=10%, signal=20%
KEGG_GLYCOSYLPHOSPHATIDYLINOSITOL_GPI_ANCHOR_BIOSYNTHESIS	KEGG_GLYCOSYLPHOSPHATIDYLINOSITOL_GPI_ANCHOR_BIOSYNTHESIS		25	0.588413	1.03374	0.394643	0.825476	1	5931	tags=52%, list=10%, signal=58%
KEGG_TERPENOID_BACKBONE_BIOSYNTHESIS	KEGG_TERPENOID_BACKBONE_BIOSYNTHESIS		15	0.64542	0.998028	0.451786	0.861064	1	7765	tags=67%, list=13%, signal=77%
KEGG_ALANINE_ASPARTATE_AND_GLUTAMATE_METABOLISM	KEGG_ALANINE_ASPARTATE_AND_GLUTAMATE_METABOLISM		32	0.534224	1.00214	0.441652	0.861725	1	7452	tags=44%, list=13%, signal=50%
KEGG_MELANOMA	KEGG_MELANOMA		70	0.479268	1.00594	0.410684	0.863725	1	7716	tags=33%, list=13%, signal=38%
KEGG_CARDIAC_MUSCLE_CONTRACTION	KEGG_CARDIAC_MUSCLE_CONTRACTION		72	0.472905	0.992159	0.465232	0.867037	1	7392	tags=42%, list=13%, signal=48%
KEGG_OLFACTORY_TRANSDUCTION	KEGG_OLFACTORY_TRANSDUCTION		385	0.398093	0.980712	0.512337	0.893084	1	8889	tags=5%, list=15%, signal=5%
KEGG_NITROGEN_METABOLISM	KEGG_NITROGEN_METABOLISM		23	0.549013	0.95835	0.510601	0.898983	1	10446	tags=52%, list=18%, signal=64%
KEGG_UBIQUITIN_MEDIATED_PROTEOLYSIS	KEGG_UBIQUITIN_MEDIATED_PROTEOLYSIS		134	0.433057	0.960179	0.558528	0.908011	1	9713	tags=51%, list=17%, signal=61%
KEGG_TASTE_TRANSDUCTION	KEGG_TASTE_TRANSDUCTION		50	0.485861	0.963053	0.509632	0.913546	1	6812	tags=20%, list=12%, signal=23%
KEGG_AXON_GUIDANCE	KEGG_AXON_GUIDANCE		127	0.432246	0.970948	0.504792	0.915762	1	7953	tags=35%, list=14%, signal=40%
KEGG_PROGESTERONE_MEDIATED_OOCYTE_MATURATION	KEGG_PROGESTERONE_MEDIATED_OOCYTE_MATURATION		84	0.419289	0.894429	0.69916	0.920176	1	8627	tags=42%, list=15%, signal=49%
KEGG_NICOTINATE_AND_NICOTINAMIDE_METABOLISM	KEGG_NICOTINATE_AND_NICOTINAMIDE_METABOLISM		22	0.518929	0.88816	0.620438	0.927174	1	6293	tags=45%, list=11%, signal=51%
KEGG_ALLOGRAFT_REJECTION	KEGG_ALLOGRAFT_REJECTION		35	0.474824	0.883409	0.657194	0.929577	1	5598	tags=20%, list=10%, signal=22%
KEGG_VIRAL_MYOCARDITIS	KEGG_VIRAL_MYOCARDITIS		68	0.45901	0.96309	0.503367	0.92972	1	6999	tags=31%, list=12%, signal=35%
KEGG_MELANOGENESIS	KEGG_MELANOGENESIS		101	0.40906	0.894883	0.71521	0.931496	1	7230	tags=33%, list=13%, signal=37%
KEGG_NEUROACTIVE_LIGAND_RECEPTOR_INTERACTION	KEGG_NEUROACTIVE_LIGAND_RECEPTOR_INTERACTION		269	0.38085	0.905028	0.767123	0.938133	1	6448	tags=19%, list=11%, signal=22%
KEGG_TYPE_I_DIABETES_MELLITUS	KEGG_TYPE_I_DIABETES_MELLITUS		41	0.467292	0.895829	0.64386	0.941619	1	5598	tags=22%, list=10%, signal=24%
KEGG_AMYOTROPHIC_LATERAL_SCLEROSIS_ALS	KEGG_AMYOTROPHIC_LATERAL_SCLEROSIS_ALS		52	0.430336	0.848749	0.761269	0.945269	1	6899	tags=37%, list=12%, signal=41%
KEGG_BLADDER_CANCER	KEGG_BLADDER_CANCER		42	0.45069	0.873836	0.693333	0.945637	1	8491	tags=50%, list=15%, signal=59%
KEGG_CALCIUM_SIGNALING_PATHWAY	KEGG_CALCIUM_SIGNALING_PATHWAY		175	0.374471	0.86974	0.871363	0.946325	1	7370	tags=30%, list=13%, signal=34%
KEGG_PORPHYRIN_AND_CHLOROPHYLL_METABOLISM	KEGG_PORPHYRIN_AND_CHLOROPHYLL_METABOLISM		40	0.475192	0.906458	0.609375	0.947314	1	3774	tags=45%, list=7%, signal=48%
KEGG_VIBRIO_CHOLERAE_INFECTION	KEGG_VIBRIO_CHOLERAE_INFECTION		54	0.450256	0.897907	0.635434	0.94781	1	8646	tags=43%, list=15%, signal=50%
KEGG_ARGININE_AND_PROLINE_METABOLISM	KEGG_ARGININE_AND_PROLINE_METABOLISM		53	0.473031	0.936154	0.559792	0.948331	1	7790	tags=49%, list=13%, signal=57%
KEGG_WNT_SIGNALING_PATHWAY	KEGG_WNT_SIGNALING_PATHWAY		149	0.375077	0.85128	0.854545	0.949596	1	8650	tags=34%, list=15%, signal=40%
KEGG_TGF_BETA_SIGNALING_PATHWAY	KEGG_TGF_BETA_SIGNALING_PATHWAY		84	0.388422	0.817036	0.86711	0.955884	1	8713	tags=39%, list=15%, signal=46%
KEGG_BASAL_TRANSCRIPTION_FACTORS	KEGG_BASAL_TRANSCRIPTION_FACTORS		35	0.425155	0.801531	0.811388	0.956975	1	7673	tags=34%, list=13%, signal=40%
KEGG_FRUCTOSE_AND_MANNOSE_METABOLISM	KEGG_FRUCTOSE_AND_MANNOSE_METABOLISM		34	0.498202	0.93794	0.528029	0.95726	1	7799	tags=53%, list=13%, signal=61%
KEGG_REGULATION_OF_ACTIN_CYTOSKELETON	KEGG_REGULATION_OF_ACTIN_CYTOSKELETON		210	0.387271	0.907451	0.74422	0.957918	1	8716	tags=35%, list=15%, signal=41%
KEGG_RIBOFLAVIN_METABOLISM	KEGG_RIBOFLAVIN_METABOLISM		16	0.513273	0.819956	0.70991	0.96044	1	8358	tags=44%, list=14%, signal=51%
KEGG_GRAFT_VERSUS_HOST_DISEASE	KEGG_GRAFT_VERSUS_HOST_DISEASE		37	0.44887	0.851587	0.696181	0.960583	1	5598	tags=16%, list=10%, signal=18%
KEGG_PPAR_SIGNALING_PATHWAY	KEGG_PPAR_SIGNALING_PATHWAY		69	0.438962	0.910605	0.638225	0.96165	1	7398	tags=29%, list=13%, signal=33%
KEGG_DRUG_METABOLISM_CYTOCHROME_P450	KEGG_DRUG_METABOLISM_CYTOCHROME_P450		71	0.402934	0.837252	0.821612	0.962836	1	2623	tags=28%, list=5%, signal=29%
KEGG_PRIMARY_BILE_ACID_BIOSYNTHESIS	KEGG_PRIMARY_BILE_ACID_BIOSYNTHESIS		16	0.524038	0.832714	0.715789	0.963159	1	7571	tags=44%, list=13%, signal=50%
KEGG_BIOSYNTHESIS_OF_UNSATURATED_FATTY_ACIDS	KEGG_BIOSYNTHESIS_OF_UNSATURATED_FATTY_ACIDS		22	0.464854	0.802033	0.758555	0.966635	1	8487	tags=41%, list=15%, signal=48%
KEGG_ADIPOCYTOKINE_SIGNALING_PATHWAY	KEGG_ADIPOCYTOKINE_SIGNALING_PATHWAY		67	0.382488	0.790057	0.91511	0.96851	1	8270	tags=33%, list=14%, signal=38%
KEGG_PANTOTHENATE_AND_COA_BIOSYNTHESIS	KEGG_PANTOTHENATE_AND_COA_BIOSYNTHESIS		16	0.545839	0.852592	0.693333	0.969829	1	9443	tags=56%, list=16%, signal=67%
KEGG_RENIN_ANGIOTENSIN_SYSTEM	KEGG_RENIN_ANGIOTENSIN_SYSTEM		16	0.514946	0.820526	0.727106	0.970219	1	4510	tags=25%, list=8%, signal=27%
KEGG_NATURAL_KILLER_CELL_MEDIATED_CYTOTOXICITY	KEGG_NATURAL_KILLER_CELL_MEDIATED_CYTOTOXICITY		130	0.402795	0.911831	0.689369	0.972166	1	7997	tags=24%, list=14%, signal=28%
KEGG_LEUKOCYTE_TRANSENDOTHELIAL_MIGRATION	KEGG_LEUKOCYTE_TRANSENDOTHELIAL_MIGRATION		114	0.361279	0.804182	0.960461	0.973133	1	9066	tags=42%, list=16%, signal=50%
KEGG_GLYCOSAMINOGLYCAN_BIOSYNTHESIS_KERATAN_SULFATE	KEGG_GLYCOSAMINOGLYCAN_BIOSYNTHESIS_KERATAN_SULFATE		15	0.499846	0.773309	0.780952	0.975164	1	6689	tags=40%, list=12%, signal=45%
KEGG_PATHWAYS_IN_CANCER	KEGG_PATHWAYS_IN_CANCER		323	0.350388	0.855205	0.984985	0.975519	1	8491	tags=34%, list=15%, signal=39%
KEGG_SELENOAMINO_ACID_METABOLISM	KEGG_SELENOAMINO_ACID_METABOLISM		26	0.412489	0.72505	0.916107	0.976649	1	7640	tags=46%, list=13%, signal=53%
KEGG_GALACTOSE_METABOLISM	KEGG_GALACTOSE_METABOLISM		25	0.471965	0.821342	0.738137	0.979693	1	7412	tags=48%, list=13%, signal=55%
KEGG_ALPHA_LINOLENIC_ACID_METABOLISM	KEGG_ALPHA_LINOLENIC_ACID_METABOLISM		19	0.421597	0.69341	0.927911	0.983943	1	8596	tags=42%, list=15%, signal=49%
KEGG_STEROID_BIOSYNTHESIS	KEGG_STEROID_BIOSYNTHESIS		16	0.485757	0.774495	0.781955	0.984023	1	8501	tags=63%, list=15%, signal=73%
KEGG_ADHERENS_JUNCTION	KEGG_ADHERENS_JUNCTION		73	0.349379	0.727766	0.998377	0.984604	1	8027	tags=34%, list=14%, signal=40%
KEGG_COLORECTAL_CANCER	KEGG_COLORECTAL_CANCER		61	0.368448	0.758608	0.969858	0.984736	1	7153	tags=34%, list=12%, signal=39%
KEGG_LYSINE_DEGRADATION	KEGG_LYSINE_DEGRADATION		44	0.468449	0.912374	0.587074	0.985388	1	4334	tags=34%, list=8%, signal=37%
KEGG_PRIMARY_IMMUNODEFICIENCY	KEGG_PRIMARY_IMMUNODEFICIENCY		34	0.49193	0.915862	0.578014	0.988306	1	5705	tags=29%, list=10%, signal=33%
KEGG_CYTOSOLIC_DNA_SENSING_PATHWAY	KEGG_CYTOSOLIC_DNA_SENSING_PATHWAY		56	0.371979	0.743525	0.95053	0.99118	1	9871	tags=39%, list=17%, signal=47%
KEGG_THYROID_CANCER	KEGG_THYROID_CANCER		29	0.496494	0.91902	0.585106	0.993025	1	7661	tags=45%, list=13%, signal=52%
KEGG_ARRHYTHMOGENIC_RIGHT_VENTRICULAR_CARDIOMYOPATHY_ARVC	KEGG_ARRHYTHMOGENIC_RIGHT_VENTRICULAR_CARDIOMYOPATHY_ARVC		73	0.351404	0.727866	0.998249	0.994696	1	7845	tags=30%, list=14%, signal=35%
