# Supplementary material for: Transcriptome profiling of HepG2 cells exposed to the flame retardant 9,10-dihydro-9-oxa-10-phosphaphenanthrene 10-oxide (DOPO)
Source: Royal Society of Chemistry journal article supplement (doi:10.1039/c8tx00006a), 2018-01-01
Supplement: c8tx00006a1.zip [file Supplementary_File_5.xlsx]

## Sheet: High-dose REVIGO treemap
% WARNING - This is exported REVIGO data useful only for the specific purpose of constructing a TreeMap visualization.
% Do not use this table as a general list of non-redundant GO categories	as it sets an extremely permissive
% threshold to detect redundancies (c=0.10) and fill the 'representative' column	while normally c>=0.4 is recommended.
% To export a reduced-redundancy set of GO terms	go to the Scatterplot & Table tab	and export to CSV from there.
term_ID	description	frequencyInDb	log10pvalue	uniqueness	dispensability	representative
GO:0009892	negative regulation of metabolic process	0.00898	-5.9586	0.731	0	negative regulation of metabolism
GO:0048522	positive regulation of cellular process	0.00429	-5.301	0.798	0.325	negative regulation of metabolism
GO:0048519	negative regulation of biological process	0.01243	-4.3372	0.824	0.363	negative regulation of metabolism
GO:0048518	positive regulation of biological process	0.00684	-4.7447	0.833	0.341	negative regulation of metabolism
GO:0023051	regulation of signaling	0.00379	-3.4318	0.825	0.321	negative regulation of metabolism
GO:0042592	homeostatic process	0.0097	-2.5229	0.831	0.346	negative regulation of metabolism
GO:0010646	regulation of cell communication	0.0038	-4.3279	0.77	0.321	negative regulation of metabolism
GO:0032880	regulation of protein localization	0.00053	-3.5376	0.758	0.645	negative regulation of metabolism
GO:0032369	negative regulation of lipid transport	2e-05	-3.7696	0.734	0.548	negative regulation of metabolism
GO:0010608	posttranscriptional regulation of gene expression	0.00537	-4.2076	0.756	0.413	negative regulation of metabolism
GO:0051340	regulation of ligase activity	2e-05	-2.5086	0.865	0.583	negative regulation of metabolism
GO:0044092	negative regulation of molecular function	0.00389	-3.8239	0.836	0.315	negative regulation of metabolism
GO:0030518	intracellular steroid hormone receptor signaling pathway	7e-05	-2.9586	0.779	0.416	negative regulation of metabolism
GO:0030521	androgen receptor signaling pathway	3e-05	-2.699	0.789	0.674	negative regulation of metabolism
GO:0045717	negative regulation of fatty acid biosynthetic process	0.00017	-2.9586	0.68	0.648	negative regulation of metabolism
GO:0051171	regulation of nitrogen compound metabolic process	0.08828	-5.0605	0.703	0.575	negative regulation of metabolism
GO:0043933	macromolecular complex subunit organization	0.01063	-10.7696	0.867	0	macromolecular complex subunit organization
GO:0071822	protein complex subunit organization	0.00868	-9.6198	0.856	0.649	macromolecular complex subunit organization
GO:0034377	plasma lipoprotein particle assembly	1e-05	-3.585	0.789	0.373	macromolecular complex subunit organization
GO:1902589	single-organism organelle organization	0.00635	-6.5229	0.821	0.628	macromolecular complex subunit organization
GO:1902591	single-organism membrane budding	2e-05	-2.585	0.821	0.397	macromolecular complex subunit organization
GO:0061024	membrane organization	0.01009	-6	0.868	0.66	macromolecular complex subunit organization
GO:0044802	single-organism membrane organization	0.0032	-5.4559	0.836	0.586	macromolecular complex subunit organization
GO:0070271	protein complex biogenesis	0.00565	-6.4685	0.908	0.567	macromolecular complex subunit organization
GO:0006996	organelle organization	0.00932	-10.4559	0.869	0.654	macromolecular complex subunit organization
GO:0022411	cellular component disassembly	0.00293	-4.1805	0.845	0.581	macromolecular complex subunit organization
GO:0051128	regulation of cellular component organization	0.0102	-3.0132	0.718	0.66	macromolecular complex subunit organization
GO:0010256	endomembrane system organization	0.00029	-3.699	0.899	0.475	macromolecular complex subunit organization
GO:0048194	Golgi vesicle budding	0	-2.5686	0.794	0.698	macromolecular complex subunit organization
GO:0048002	antigen processing and presentation of peptide antigen	0.00062	-2.5686	0.994	0	antigen processing and presentation of peptide antigen
GO:0016071	mRNA metabolic process	0.00494	-8.6778	0.835	0.029	mRNA metabolism
GO:0044711	single-organism biosynthetic process	0.12458	-4.4949	0.846	0.497	mRNA metabolism
GO:0051246	regulation of protein metabolic process	0.00876	-3.4437	0.736	0.443	mRNA metabolism
GO:0006366	transcription from RNA polymerase II promoter	0.00236	-5.0458	0.801	0.302	mRNA metabolism
GO:0016070	RNA metabolic process	0.13709	-6.041	0.766	0.463	mRNA metabolism
GO:0009057	macromolecule catabolic process	0.01643	-5.8539	0.861	0.5	mRNA metabolism
GO:0044260	cellular macromolecule metabolic process	0.28588	-12.3098	0.811	0.313	mRNA metabolism
GO:0009059	macromolecule biosynthetic process	0.17669	-8.699	0.822	0.554	mRNA metabolism
GO:0070647	protein modification by small protein conjugation or removal	0.00133	-4.1427	0.859	0.677	mRNA metabolism
GO:0044249	cellular biosynthetic process	0.28205	-12.7959	0.831	0.298	mRNA metabolism
GO:0044248	cellular catabolic process	0.07945	-9.6383	0.857	0.637	mRNA metabolism
GO:0044271	cellular nitrogen compound biosynthetic process	0.15794	-8.1024	0.804	0.534	mRNA metabolism
GO:0044272	sulfur compound biosynthetic process	0.01342	-4.4318	0.866	0.191	mRNA metabolism
GO:0044267	cellular protein metabolic process	0.08784	-11.8239	0.805	0.614	mRNA metabolism
GO:0044265	cellular macromolecule catabolic process	0.01109	-6.5376	0.821	0.182	mRNA metabolism
GO:0000956	nuclear-transcribed mRNA catabolic process	0.00013	-5.3098	0.833	0.601	mRNA metabolism
GO:0043620	regulation of DNA-templated transcription in response to stress	2e-05	-2.9208	0.735	0.568	mRNA metabolism
GO:1901576	organic substance biosynthetic process	0.28886	-12.7696	0.853	0.663	mRNA metabolism
GO:0043618	regulation of transcription from RNA polymerase II promoter in response to stress	2e-05	-2.7696	0.733	0.564	mRNA metabolism
GO:0019438	aromatic compound biosynthetic process	0.15562	-5.0269	0.814	0.532	mRNA metabolism
GO:0043604	amide biosynthetic process	0.00553	-5.0757	0.856	0.139	mRNA metabolism
GO:0043603	cellular amide metabolic process	0.0091	-4.2366	0.896	0.147	mRNA metabolism
GO:0032446	protein modification by small protein conjugation	0.00123	-5	0.856	0.671	mRNA metabolism
GO:0006259	DNA metabolic process	0.06339	-4.1612	0.792	0.539	mRNA metabolism
GO:0019538	protein metabolic process	0.12328	-10.0757	0.867	0.448	mRNA metabolism
GO:0010467	gene expression	0.16702	-6.7447	0.865	0.493	mRNA metabolism
GO:0018130	heterocycle biosynthetic process	0.1615	-5.4437	0.814	0.538	mRNA metabolism
GO:0043412	macromolecule modification	0.05091	-6.699	0.887	0.354	mRNA metabolism
GO:0006412	translation	0.04698	-4.6576	0.765	0.672	mRNA metabolism
GO:0097659	nucleic acid-templated transcription	0.00772	-3.0862	0.801	0.406	mRNA metabolism
GO:0006413	translational initiation	0.00267	-5.2596	0.825	0.469	mRNA metabolism
GO:0006396	RNA processing	0.02784	-5.1675	0.794	0.386	mRNA metabolism
GO:0008380	RNA splicing	0.00097	-3.6383	0.845	0.28	mRNA metabolism
GO:0000122	negative regulation of transcription from RNA polymerase II promoter	0.0004	-4.284	0.677	0.696	mRNA metabolism
GO:0006446	regulation of translational initiation	0.00017	-3.585	0.755	0.363	mRNA metabolism
GO:0044282	small molecule catabolic process	0.01347	-2.8539	0.855	0.503	mRNA metabolism
GO:1901362	organic cyclic compound biosynthetic process	0.16583	-5.9208	0.833	0.543	mRNA metabolism
GO:0034248	regulation of cellular amide metabolic process	1e-05	-3.6383	0.828	0.56	mRNA metabolism
GO:0006464	cellular protein modification process	0.02895	-6.2291	0.811	0.222	mRNA metabolism
GO:0034654	nucleobase-containing compound biosynthetic process	0.13019	-5.284	0.774	0.503	mRNA metabolism
GO:0034645	cellular macromolecule biosynthetic process	0.172	-8.4437	0.767	0.55	mRNA metabolism
GO:0007049	cell cycle	0.0141	-8.2147	0.907	0.032	cell cycle
GO:0016259	selenocysteine metabolic process	0.0005	-3.3098	0.852	0.477	cell cycle
GO:0032787	monocarboxylic acid metabolic process	0.02312	-4.7212	0.817	0.632	cell cycle
GO:0000278	mitotic cell cycle	0.00087	-6.699	0.885	0.684	cell cycle
GO:0055086	nucleobase-containing small molecule metabolic process	0.10836	-3.2518	0.753	0.526	cell cycle
GO:0044723	single-organism carbohydrate metabolic process	0.03597	-2.7212	0.885	0.174	cell cycle
GO:0044770	cell cycle phase transition	0.0003	-4.6383	0.885	0.683	cell cycle
GO:0044255	cellular lipid metabolic process	0.02577	-5.4815	0.838	0.127	cell cycle
GO:0045333	cellular respiration	0.02258	-3.284	0.866	0.151	cell cycle
GO:0055114	oxidation-reduction process	0.15044	-7.2676	0.904	0.328	cell cycle
GO:0009069	serine family amino acid metabolic process	0.00643	-3.7696	0.815	0.626	cell cycle
GO:0009066	aspartate family amino acid metabolic process	0.00858	-3.3098	0.81	0.649	cell cycle
GO:0051301	cell division	0.01357	-3.2596	0.908	0.118	cell cycle
GO:1901564	organonitrogen compound metabolic process	0.19565	-10.4685	0.876	0.428	cell cycle
GO:1901566	organonitrogen compound biosynthetic process	0.09297	-5.5376	0.829	0.475	cell cycle
GO:0019432	triglyceride biosynthetic process	2e-05	-3.4089	0.87	0.471	cell cycle
GO:0006139	nucleobase-containing compound metabolic process	0.29917	-8.4437	0.801	0.507	cell cycle
GO:1901605	alpha-amino acid metabolic process	0.04267	-4.9586	0.774	0.17	cell cycle
GO:1901657	glycosyl compound metabolic process	0.0826	-4.4437	0.867	0.279	cell cycle
GO:0090304	nucleic acid metabolic process	0.20158	-6.6576	0.772	0.528	cell cycle
GO:0006066	alcohol metabolic process	0.00582	-2.5086	0.886	0.291	cell cycle
GO:0006575	cellular modified amino acid metabolic process	0.0098	-4.9208	0.881	0.337	cell cycle
GO:0000075	cell cycle checkpoint	0.0002	-3	0.893	0.611	cell cycle
GO:0008202	steroid metabolic process	0.0004	-2.8239	0.893	0.587	cell cycle
GO:0000077	DNA damage checkpoint	0.00011	-2.6383	0.823	0.586	cell cycle
GO:0006638	neutral lipid metabolic process	6e-05	-2.5376	0.9	0.501	cell cycle
GO:0006629	lipid metabolic process	0.03094	-5.1487	0.887	0.158	cell cycle
GO:0006081	cellular aldehyde metabolic process	0.00465	-4.0088	0.885	0.104	cell cycle
GO:0006082	organic acid metabolic process	0.09359	-12	0.803	0.437	cell cycle
GO:1903047	mitotic cell cycle process	0.00077	-7.4202	0.872	0.677	cell cycle
GO:0044283	small molecule biosynthetic process	0.05873	-2.8861	0.826	0.464	cell cycle
GO:0022402	cell cycle process	0.00527	-7.9586	0.868	0.106	cell cycle
GO:0044281	small molecule metabolic process	0.215	-17.0177	0.898	0.24	cell cycle
GO:0034641	cellular nitrogen compound metabolic process	0.33428	-11.7447	0.842	0.274	cell cycle
GO:0033554	cellular response to stress	0.02335	-7.6383	0.846	0.035	cellular response to stress
GO:1901700	response to oxygen-containing compound	0.00312	-4.5086	0.876	0.7	cellular response to stress
GO:0048583	regulation of response to stimulus	0.0069	-4.0362	0.773	0.507	cellular response to stress
GO:0009991	response to extracellular stimulus	0.00516	-3.3872	0.903	0.491	cellular response to stress
GO:0010033	response to organic substance	0.00287	-5.2596	0.876	0.461	cellular response to stress
GO:0009266	response to temperature stimulus	0.00147	-2.585	0.91	0.698	cellular response to stress
GO:0009725	response to hormone	0.00077	-3.6198	0.869	0.625	cellular response to stress
GO:0030968	endoplasmic reticulum unfolded protein response	5e-05	-2.6198	0.742	0.681	cellular response to stress
GO:0007584	response to nutrient	4e-05	-2.6778	0.9	0.553	cellular response to stress
GO:0071453	cellular response to oxygen levels	5e-05	-2.7696	0.869	0.514	cellular response to stress
GO:0031667	response to nutrient levels	0.00065	-3.1024	0.915	0.67	cellular response to stress
GO:0071466	cellular response to xenobiotic stimulus	0.00068	-3.3188	0.85	0.619	cellular response to stress
GO:0080135	regulation of cellular response to stress	0.00066	-3.5376	0.764	0.552	cellular response to stress
GO:0009410	response to xenobiotic stimulus	0.00069	-3.0969	0.887	0.62	cellular response to stress
GO:0016032	viral process	0.01744	-6.0605	0.945	0.036	viral process
GO:0001887	selenium compound metabolic process	0.0006	-5.301	0.946	0.045	selenium compound metabolism
GO:1901615	organic hydroxy compound metabolic process	0.00994	-2.5686	0.949	0.051	organic hydroxy compound metabolism
GO:1902582	single-organism intracellular transport	0.00461	-7.9586	0.809	0.059	single-organism intracellular transport
GO:0044765	single-organism transport	0.12592	-6.8539	0.841	0.581	single-organism intracellular transport
GO:0071166	ribonucleoprotein complex localization	3e-05	-3.7959	0.893	0.51	single-organism intracellular transport
GO:0006892	post-Golgi vesicle-mediated transport	5e-05	-2.7696	0.849	0.641	single-organism intracellular transport
GO:0071702	organic substance transport	0.05487	-7.2924	0.902	0.426	single-organism intracellular transport
GO:0071705	nitrogen compound transport	0.02072	-3.9208	0.911	0.312	single-organism intracellular transport
GO:0008643	carbohydrate transport	0.01467	-3	0.856	0.535	single-organism intracellular transport
GO:0008645	hexose transport	0.00137	-3.8539	0.877	0.649	single-organism intracellular transport
GO:0015931	nucleobase-containing compound transport	0.00238	-4.7212	0.903	0.253	single-organism intracellular transport
GO:0016197	endosomal transport	0.00015	-3.9586	0.846	0.687	single-organism intracellular transport
GO:0050658	RNA transport	0.00118	-3.5376	0.861	0.594	single-organism intracellular transport
GO:0015749	monosaccharide transport	0.00198	-3.7696	0.875	0.447	single-organism intracellular transport
GO:0006403	RNA localization	0.00119	-4.1192	0.88	0.234	single-organism intracellular transport
GO:0071426	ribonucleoprotein complex export from nucleus	3e-05	-4.0088	0.851	0.614	single-organism intracellular transport
GO:0051656	establishment of organelle localization	0.00023	-2.5376	0.879	0.588	single-organism intracellular transport
GO:0006790	sulfur compound metabolic process	0.01673	-5	0.927	0.061	sulfur compound metabolism
GO:0030010	establishment of cell polarity	7e-05	-2.6383	0.938	0.073	establishment of cell polarity
GO:0045444	fat cell differentiation	0.00011	-3.4202	0.933	0.075	fat cell differentiation
GO:0050767	regulation of neurogenesis	0.00031	-2.7447	0.812	0.681	fat cell differentiation
GO:0051186	cofactor metabolic process	0.03606	-3.7696	0.92	0.077	cofactor metabolism
GO:0006796	phosphate-containing compound metabolic process	0.16693	-4.3468	0.869	0.198	cofactor metabolism
GO:0006793	phosphorus metabolic process	0.16891	-5.0458	0.901	0.198	cofactor metabolism
GO:0046483	heterocycle metabolic process	0.33326	-9.3665	0.888	0.129	cofactor metabolism
GO:0009123	nucleoside monophosphate metabolic process	0.06477	-4.0809	0.743	0.653	cofactor metabolism
GO:0006725	cellular aromatic compound metabolic process	0.33051	-8.8539	0.888	0.259	cofactor metabolism
GO:0006732	coenzyme metabolic process	0.02742	-3.3098	0.919	0.082	coenzyme metabolism
GO:0006091	generation of precursor metabolites and energy	0.03224	-3.6576	0.921	0.084	generation of precursor metabolites and energy
GO:1901360	organic cyclic compound metabolic process	0.33913	-10.7696	0.915	0.089	organic cyclic compound metabolism
GO:0043170	macromolecule metabolic process	0.32799	-9.6383	0.916	0.23	organic cyclic compound metabolism
GO:1901135	carbohydrate derivative metabolic process	0.11649	-3.7447	0.93	0.156	organic cyclic compound metabolism
GO:0005975	carbohydrate metabolic process	0.05984	-2.9208	0.927	0.13	organic cyclic compound metabolism
GO:0007017	microtubule-based process	0.00172	-3.1871	0.923	0.095	microtubule-based process
GO:0006915	apoptotic process	0.00247	-3.8861	0.87	0.098	apoptotic process
GO:1902175	regulation of oxidative stress-induced intrinsic apoptotic signaling pathway	1e-05	-2.7212	0.734	0.668	apoptotic process

## Sheet: Low-Dose REVIGO treemap
% WARNING - This is exported REVIGO data useful only for the specific purpose of constructing a TreeMap visualization.
% Do not use this table as a general list of non-redundant GO categories	as it sets an extremely permissive
% threshold to detect redundancies (c=0.10) and fill the 'representative' column	while normally c>=0.4 is recommended.
% To export a reduced-redundancy set of GO terms	go to the Scatterplot & Table tab	and export to CSV from there.
term_ID	description	frequencyInDb	log10pvalue	uniqueness	dispensability	representative
GO:0006614	SRP-dependent cotranslational protein targeting to membrane	0.00097	-3.1938	0.521	0	SRP-dependent cotranslational protein targeting to membrane
GO:0070199	establishment of protein localization to chromosome	0	-2.9586	0.676	0.667	SRP-dependent cotranslational protein targeting to membrane
GO:0006415	translational termination	0.00178	-2.8539	0.766	0.454	SRP-dependent cotranslational protein targeting to membrane
GO:1903076	regulation of protein localization to plasma membrane	3e-05	-1.9208	0.533	0.69	SRP-dependent cotranslational protein targeting to membrane
GO:0051297	centrosome organization	8e-05	-2.6778	0.798	0.368	SRP-dependent cotranslational protein targeting to membrane
GO:0001887	selenium compound metabolic process	0.0006	-3.1805	0.917	0.02	selenium compound metabolism
GO:0051930	regulation of sensory perception of pain	1e-05	-2.3279	0.75	0.03	regulation of sensory perception of pain
GO:0032922	circadian regulation of gene expression	3e-05	-1.9586	0.757	0.433	regulation of sensory perception of pain
GO:0000184	nuclear-transcribed mRNA catabolic process, nonsense-mediated decay	4e-05	-3.1549	0.885	0.033	nuclear-transcribed mRNA catabolism, nonsense-mediated decay
GO:0006301	postreplication repair	2e-05	-1.9208	0.782	0.344	nuclear-transcribed mRNA catabolism, nonsense-mediated decay
GO:0043484	regulation of RNA splicing	6e-05	-2.1427	0.77	0.174	nuclear-transcribed mRNA catabolism, nonsense-mediated decay
GO:0070911	global genome nucleotide-excision repair	0	-1.9208	0.812	0.269	nuclear-transcribed mRNA catabolism, nonsense-mediated decay
GO:0002753	cytoplasmic pattern recognition receptor signaling pathway	0.00097	-2.0706	0.607	0.207	nuclear-transcribed mRNA catabolism, nonsense-mediated decay
GO:0071398	cellular response to fatty acid	1e-05	-2.0706	0.855	0.28	nuclear-transcribed mRNA catabolism, nonsense-mediated decay
GO:0008593	regulation of Notch signaling pathway	4e-05	-1.8861	0.701	0.578	nuclear-transcribed mRNA catabolism, nonsense-mediated decay
GO:2001022	positive regulation of response to DNA damage stimulus	4e-05	-1.9208	0.674	0.671	nuclear-transcribed mRNA catabolism, nonsense-mediated decay
GO:0033002	muscle cell proliferation	7e-05	-3.1549	0.822	0.034	muscle cell proliferation
GO:0048659	smooth muscle cell proliferation	4e-05	-3.1024	0.802	0.69	muscle cell proliferation
GO:0043094	cellular metabolic compound salvage	0.00368	-2.3188	0.902	0.044	cellular metabolic compound salvage
GO:0009069	serine family amino acid metabolic process	0.00643	-3.0458	0.783	0.084	serine family amino acid metabolism
GO:0016259	selenocysteine metabolic process	0.0005	-3.1427	0.807	0.477	serine family amino acid metabolism
GO:0045980	negative regulation of nucleotide metabolic process	3e-05	-1.8861	0.739	0.287	serine family amino acid metabolism
GO:1900543	negative regulation of purine nucleotide metabolic process	2e-05	-1.9208	0.742	0.64	serine family amino acid metabolism
GO:0009124	nucleoside monophosphate biosynthetic process	0.01559	-2.1739	0.791	0.262	serine family amino acid metabolism
GO:0009066	aspartate family amino acid metabolic process	0.00858	-2	0.78	0.616	serine family amino acid metabolism
GO:0000096	sulfur amino acid metabolic process	0.00604	-2.0969	0.83	0.505	serine family amino acid metabolism
